# Supplementary material for: Single-cell transcriptomics identifies altered neutrophil dynamics and accentuated T-cell cytotoxicity in tobacco-flavored e-cigarette-exposed mouse lungs
Source: eLife journal article supplement (doi:10.7554/elife.106380), 2025-04-01
Supplement: fig1-data1 [file Fig1-SD1.xlsx]

## Sheet: Fig1-SD1
Figure 1-Source Data1: Day wise levels of Ni, Cu, K and Zn as determined by ICP-MS in the aerosols captured daily during exposures using inExpose nose-only inhalation system from Scireq technologies as plotted in Figure 1B.
		Nickel							Copper
	PGVG	Fruit	Menthol	Tobacco				PGVG	Fruit	Menthol	Tobacco
Liquid	2.0897	1.63178	4.73097	2.83866			Liquid	2.15508	0.865675	2.72035	2.00139
Day1	2.91872	11.3641	65.644	18.5153			Day1	0.535714	0.656519	1.11473	0.923259
Day2	1.21995	36.2968	104.945	44.5749			Day2	0.718847	1.35219	1.25265	1.147
Day3	0.592667	32.1558	77.0232	42.2979			Day3	0.227929	1.80544	3.0724	2.05139
Day4	0.262552	52.8596	110.326	49.6359			Day4	0.155115	0.930357	1.78273	1.16056
Day5	0.217592	19.6674	59.6789	53.606			Day5	0.20447	0.46466	2.04298	1.32402
		Potassium							Zinc
	PGVG	Fruit	Menthol	Tobacco				PGVG	Fruit	Menthol	Tobacco
Liquid	0.79619	0.843393	1.21045	0.67273			Liquid	0.321978	0.362073	0.679286	1.93774
Day1	0.91749	0.53	1.43515	0.611012			Day1	0.174692	0.785696	1.72104	0.980145
Day2	1.19694	1.14545	1.18606	0.407044			Day2	0.183383	1.69044	1.68311	2.03914
Day3	0.863798	1.76441	1.15387	0.652779			Day3	0.194384	1.72719	2.19101	1.94678
Day4	0.875725	0.597968	1.80453	0.448712			Day4	0.176379	2.05342	2.95218	2.07344
Day5	0.835828	0.921111	1.01273	0.416072			Day5	0.15888	1.00998	1.73996	1.51714
