# Supplementary material for: Single-cell transcriptomics identifies altered neutrophil dynamics and accentuated T-cell cytotoxicity in tobacco-flavored e-cigarette-exposed mouse lungs
Source: eLife journal article supplement (doi:10.7554/elife.106380), 2025-04-01
Supplement: fig1-figsupp1-data1 [file Fig1-SD2.xlsx]

## Sheet: Fig1-SD2
Figure 1-Source Data 2: Serum cotinine levels in the blood of differently flavored e-cig aerosol exposed and control (air and PGVG) C57BL/6J mice as plotted in Figure 1-Supplement 1B.
	Air	PGVG	Mango	Menthol	Tobacco
	0	0	1324.21	894.293	843.427
	0	0	961.839	1268.24	1816.06
	0	0	700.201	1406.88	1763.2
	0	0	676.096	653.573	1233.44
