# Supplementary material for: Single-cell transcriptomics identifies altered neutrophil dynamics and accentuated T-cell cytotoxicity in tobacco-flavored e-cigarette-exposed mouse lungs
Source: eLife journal article supplement (doi:10.7554/elife.106380), 2025-04-01
Supplement: fig2-data1 [file Fig2-SD1.xlsx]

## Sheet: Fig2-SD1
Figure 2-Source Data 1: Number of significant (p < 0.05) differentially up- and downregulated genes in the myeloid and lymphoid clusters in PGVG, fruit-, menthol- and tobacco-flavored e-cig aerosol exposed mouse lungs when compared to air controls as plotted in Figure 2D.
		Myeloid Cluster					Lymphoid Cluster
		Up	Down				Up	Down
	PGVG	57	219			PGVG	9	15
	Mango	17	7			Mango	40	72
	Menthol	220	104			Menthol	8	1
	Tobacco	338	215			Tobacco	25	16
