# Supplementary material for: Single-cell transcriptomics identifies altered neutrophil dynamics and accentuated T-cell cytotoxicity in tobacco-flavored e-cigarette-exposed mouse lungs
Source: eLife journal article supplement (doi:10.7554/elife.106380), 2025-04-01
Supplement: fig2-figsupp1-data1 [file Fig2- SD2.xlsx]

## Sheet: Fig2- SD2
Figure 2- Source Data 2: Cell frequencies of major cell clusters (epithelial, endothelial, stromal, myeloid and lymphoid) in control (air) and exposed (PGVG, fruit, menthol and tobacco) mouse lungs in each sample as determined by scRNA seq after filtering, clustering and dimensionality reduction as plotted in Figure 2-Supplement 1C.
		Endothelial Cells		Lymphoid Cells		Myeloid Cells		Stromal Cells		Epithelial Cells
	Air	44.6476	51.9498	25.9249	19.1835	17.0629	14.6035	7.4272	8.15232	3.6714	4.6323
	PGVG	46.2569	45.9093	23.7637	27.1725	14.8352	15.5998	11.1092	8.30861	3.07349	1.94998
	Fruit	43.1312	35.8118	30.2657	33.7958	13.4605	16.8654	8.74115	9.11554	3.46773	3.2842
	Menthol	47.4766	40.2786	20.8627	27.4019	17.5845	20.3383	9.15888	7.37635	3.89648	3.8232
	Tobacco	41.4294	41.7755	21.994	33.9376	23.2192	14.3162	9.18919	6.4916	3.01502	2.38603
