# Supplementary material for: Single-cell transcriptomics identifies altered neutrophil dynamics and accentuated T-cell cytotoxicity in tobacco-flavored e-cigarette-exposed mouse lungs
Source: eLife journal article supplement (doi:10.7554/elife.106380), 2025-04-01
Supplement: fig3-data1 [file Fig3-SD1.xlsx]

## Sheet: Fig3-SD1
Figure 3- Source Data 1: Relative cell frequencies of alveolar macrophages and neutrophils across controls and flavored e-cig aerosol exposed mouse lungs as determined using scRNA seq as plotted in Figure 3A-B.
			Macrophages										Neutrophils
	Air	PGVG	Fruit	Menthol	Tobacco						Air	PGVG	Fruit	Menthol	Tobacco
	0.059502	0.064217	0.0463732	0.0474479	0.0466066						0.0766634	0.0346841	0.0473992	0.0858375	0.138619
	0.0659513	0.0568037	0.0438977	0.0426379	0.0315916						0.0461921	0.0381518	0.0666594	0.115122	0.0569182
