# Supplementary material for: Single-cell transcriptomics identifies altered neutrophil dynamics and accentuated T-cell cytotoxicity in tobacco-flavored e-cigarette-exposed mouse lungs
Source: eLife journal article supplement (doi:10.7554/elife.106380), 2025-04-01
Supplement: fig3-data2 [file Fig3-SD2.xlsx]

## Sheet: Fig3-SD2
Figure 3- Source Data 2: Values showing the sex-dependent changes in the percentages of macrophages and neutrophils out of total CD45+ cells in lung digests from mice exposed to differently flavored e-cig aerosols as determined using Flow cytometry as plotted in Figures 3D & 3-Supplement 1A-B.
				Macrophages										Neutrophils
		Female			Male							Female			Male
	Air	10.3209	10.6453	10.0379	9.42482	8.3451	16.2095				Air	3.53612	4.0511	2.77354	5.04845	6.89234	3.60044
	PGVG	12.5677	13.0471	16.1081	12.0606	19.5456	17.6598				PGVG	5.25422	5.51855	5.1512	13.4957	9.04427	6.87223
	PGVG+Nic	15.9917	10.3255	13.3364	14.903	16.5123	11.7863				PGVG+Nic	8.13345	7.99344	5.91239	6.52546	9.28941	6.61928
	Fruit	14.3285	11.5945	14.4047	7.24821	15.0054	16.4573				Fruit	5.1017	4.53887	5.8603	4.91783	6.7983	8.85932
	Menthol	7.64882	5.8069	10.1165	8.09086	15.7501	13.4735				Menthol	6.06348	7.8849	6.3068	17.7103	13.4782	3.71356
	Tobacco	9.68721	8.4716	16.9593	7.82425	8.80052	18.696				Tobacco	8.30267	7.04369	3.71441	14.807	15.5207	9.07183
