# Supplementary material for: Single-cell transcriptomics identifies altered neutrophil dynamics and accentuated T-cell cytotoxicity in tobacco-flavored e-cigarette-exposed mouse lungs
Source: eLife journal article supplement (doi:10.7554/elife.106380), 2025-04-01
Supplement: fig4-data1 [file Fig4-SD1.xlsx]

## Sheet: Fig4-SD1
Figure 4- Source Data 1: Values showing the sex-dependent changes in the percentages of eosinophils out of total CD45+ cells in lung digests from mice exposed to differently flavored e-cig aerosols as determined using Flow cytometry as plotted in Figures 4B and 3-Supplement 1C.
		Female			Male
	Air	8.90398	3.9488	3.71551	3.75117	5.6111	10.9932
	PGVG	3.26077	1.70946	2.2491	2.64632	2.71914	4.8181
	PGVG+Nic	3.72242	5.56996	8.91927	10.2272	9.81212	6.41101
	Fruit	4.21105	3.83121	5.23472	8.82752	10.9303	5.60271
	Menthol	0.455311	0.862063	0.65165	0.501468	0.432824	0.540135
	Tobacco	1.35695	1.30513	1.54767	1.76317	0.79326	1.04129
