# Supplementary material for: Single-cell transcriptomics identifies altered neutrophil dynamics and accentuated T-cell cytotoxicity in tobacco-flavored e-cigarette-exposed mouse lungs
Source: eLife journal article supplement (doi:10.7554/elife.106380), 2025-04-01
Supplement: fig5-data1 [file Fig5-SD1.xlsx]

## Sheet: Fig5-SD1
Figure 5- Source Data 1: Relative cell frequencies of CD4 and CD8 T cells across controls and flavored e-cig aerosol exposed mouse lungs as determined using scRNA seq as plotted in Figure 5A-B.Figure 5- A1
			CD4 T cells									CD8 T cells
	Air	PGVG	Fruit	Menthol	Tobacco					Air	PGVG	Fruit	Menthol	Tobacco
	0.0528907	0.051511	0.0422694	0.0350827	0.0356757					0.0593614	0.0501374	0.0485278	0.0435658	0.0438438
	0.0382099	0.0483256	0.0444396	0.0443434	0.0453213					0.0386025	0.050869	0.0543031	0.041643	0.0539856
