# Supplementary material for: Single-cell transcriptomics identifies altered neutrophil dynamics and accentuated T-cell cytotoxicity in tobacco-flavored e-cigarette-exposed mouse lungs
Source: eLife journal article supplement (doi:10.7554/elife.106380), 2025-04-01
Supplement: fig5-data2 [file Fig5-SD2.xlsx]

## Sheet: Fig5-SD2
Figure 5- Source Data 2: Values showing the sex-dependent changes in the percentages of CD4 and CD8 T cells out of total CD45+ cells in lung digests from mice exposed to differently flavored e-cig aerosols as determined using Flow cytometry as plotted in Figures 5D and 3-Supplement 1D-E.
				CD4 T cells									CD8 T cells
		Female			Male						Female			Male
	Air	10.3054	12.5202	11.6549	12.9259	14.9617	10.4139			Air	0.05081	1.22449	1.73578	0.132854	0.075813	0.031146
	PGVG	13.8226	14.7508	13.1658	11.1507	13.0636	12.3037			PGVG	1.666	2.15598	1.87871	1.38867	1.46585	3.27787
	PGVG+Nic	11.5304	12.3502	11.7426	10.3764	9.66957	12.4587			PGVG+Nic	1.90778	1.50301	1.76011	1.75023	1.37921	1.62539
	Fruit	10.7676	11.3367	12.1253	9.57751	9.36844	11.0805			Fruit	1.35308	2.15137	1.33436	1.5804	2.27139	2.00836
	Menthol	15.9428	14.368	14.3891	13.8543	11.1505	11.8432			Menthol	3.25596	3.60042	2.63767	2.52895	1.91176	2.11083
	Tobacco	15.9163	17.9969	16.4936	16.9458	17.3508	9.35551			Tobacco	3.42502	2.22344	2.25597	2.99049	3.29097	2.75833
