# Supplementary material for: Single-cell transcriptomics identifies altered neutrophil dynamics and accentuated T-cell cytotoxicity in tobacco-flavored e-cigarette-exposed mouse lungs
Source: eLife journal article supplement (doi:10.7554/elife.106380), 2025-04-01
Supplement: fig6-data1 [file Fig6-SD1.xlsx]

## Sheet: Fig6-SD1
Figure 6- Source Data 1: Mean value of relative fluorescence as determined from 6-10 random images captured from tissue sections from control and e-cig aerosol exposed mouse lungs quantitating Ly6G+ and S100A8+ puncta as plotted in Figure 6D.
	Ly6G+			S100A8+
	Air	Tobacco		Air	Tobacco
	0.566944	0.581491		0.62604	0.395119
	0.628208	0.696779		0.652019	0.309405
	0.598624	0.6208		0.377535	0.272652
	0.548507	0.535454		0.557425	0.377984
