# Supplementary material for: Single-cell transcriptomics identifies altered neutrophil dynamics and accentuated T-cell cytotoxicity in tobacco-flavored e-cigarette-exposed mouse lungs
Source: eLife journal article supplement (doi:10.7554/elife.106380), 2025-04-01
Supplement: fig7-data1 [file Fig7-SD1.xlsx]

## Sheet: Fig7-SD1
Figure 7- Source Data 1: Z-score table showing significant (p<0.05) DEGs and top ten GO terms associated with the respective genes in the myeloid and lymphoid cluster from mouse lungs exposed to 5-day nose-only exposure to fruit-flavored e-cig aerosol when compared to air control as plotted in Figures 7A(i-ii) & 7B(i-ii).
						Myeloid Cluster											Lymphoid Cluster
		Air		Fruit			GO Terms	Fold Enrichment					Air		Fruit			GO Terms	Fold Enrichment
	Stap1	-1.85543	-1.40802	0.347153	1.52234		NK-cell mediated immune response to tumor cell	9.75135				Ppp1r2	-1.0918	-0.3373	1.82851	1.85041		MHC class II protein complex assembly	7.09609
	Rps21	-1.39438	-1.65706	0.954759	1.5643		Hemoglobin complex	7.76667				Spib	-0.80012	-1.20853	1.99747	1.21365		Cellular response to UV-A	7.09609
	Egr1	-1.19039	-1.8407	0.341784	1.70479		Haptoglobin binding	7.75912				Plk2	-1.31492	-0.61976	1.01206	1.99115		ECM structural constituent	6.94586
	Hs6st1	-2.06294	-0.95898	0.179772	1.17084		Asp family amino acid catabolic process	7.31351				Fcrla	-0.43836	-0.82609	1.93619	1.03645		Elastic fiber assembly	6.63531
	Arih2	-1.14811	-1.84893	0.353674	1.67441		Transmembrane-ephrin receptor activity	7.05374				Klf10	-1.95041	-0.32998	1.62333	1.3201		Positive regulation of platelet activation	6.08237
	Rps29	-1.20386	-1.68609	0.811779	1.48896		Ligand-gated sodium channel activity	-5.12144				Cd83	-1.24141	-0.37098	1.30898	1.52164		High voltage-gated calcium channel activity	-7.0928
	Malt1	-1.46508	-1.39085	0.742741	1.4405		Regulation of somatic stem cell maintenance	-5.80411				Rel	-1.40666	-0.63984	0.949122	1.84357		Spindle elongation	-7.7197
	Cirbp	-1.27895	-1.46256	-0.10986	0.859874		Elastic fiber assembly	-6.33176				Rasgef1b	-1.65574	-0.36531	0.828448	1.89907		MCM complex	-8.3606
	Nr4a1	-0.97566	-1.66878	0.676767	1.15165		Negative regulation of T cell differentiation	-6.42917				Nr4a1	-0.21044	-1.4691	1.17405	1.43219		Outer kinetochore	-8.56832
	Neurl3	-1.08654	-1.53902	-0.22001	0.467295		Protein-containing complex destabilizing activity	-7.44937				Heg1	-2.00237	-0.7806	1.29941	1.29322		CMG complex	-10.7493
	Rpl38	-1.15581	-1.40796	1.21655	1.63046							Blk	-1.32372	-0.98246	1.07525	1.45531
	Hist1h1c	-1.21604	-0.74114	0.310566	0.428472							Gsn	-1.05692	-1.07043	0.771931	1.70776
	Dusp5	-0.5482	-1.36656	1.72021	1.2868							Inmt	-1.08398	-0.84748	0.892834	1.58533
	Hbb-bs	-0.5964	-0.81449	1.1499	-0.85677							Arl5b	-1.4402	-0.65696	0.644697	1.74472
	Hbb-bt	-0.68152	-0.69412	1.1721	-0.7115							Leng8	-0.87419	-1.34708	1.03801	1.31869
	Hba-a2	-0.64207	-0.71894	1.12365	-0.70601							Neurl3	-1.40968	-1.1916	0.617765	1.72652
	Hba-a1	-0.63241	-0.69362	1.15175	-0.7202							Litaf	-1.04478	-2.00909	0.639182	1.68019
	Rad51b	0.814648	0.66936	-0.94927	-1.09966							Spag9	-1.80437	-1.15061	0.724433	1.59119
	Gmds	0.802803	1.14979	-0.30303	-0.57242							Malt1	-1.25256	-1.2359	0.497795	1.76901
	Egfem1	0.937792	1.1027	-0.88648	-0.38941							Sema4c	-1.44342	-1.34773	0.602291	1.64798
	Htr2c	1.07995	1.01293	-0.5817	-0.43945							Gch1	-1.04969	-1.46467	-0.01689	2.24648
	Tfec	1.38573	1.28931	0.044714	-0.78383							Cecr2	-1.23789	-1.07103	0.257604	1.97012
	Morrbid	1.31357	1.64639	-0.36226	-1.57086							Plcb1	-1.49738	-0.65364	1.39827	0.724012
	Mitf	2.04429	1.0424	-0.55844	-0.27887							Cerk	-1.52781	-1.19204	0.488842	1.58153
												Agbl1	-0.62286	-1.53002	0.431983	1.61154
												Scd1	-1.58382	-0.75505	0.485849	1.52169
												Ldb2	-2.00501	-0.64602	1.40488	0.593468
												Maco1	-1.86005	-1.279	0.141389	1.82868
												Glp1r	-1.35483	-0.88075	1.12768	0.493843
												Klrb1b	-1.38494	-1.55272	0.873512	0.738298
												Serpinb9b	-1.17753	-1.74385	0.787221	0.752156
												Gab2	-1.66519	-1.11361	0.164092	1.35362
												Apold1	-1.21638	-0.98373	-0.15951	1.6658
												Nckap5	-1.58259	-0.77513	0.964701	0.509622
												Klra7	-1.54318	-1.30143	0.850518	0.256236
												Gm49980	-1.52398	-1.46801	-0.31922	1.24363
												Fcer1g	-1.1671	-1.73335	0.796808	0.073184
												Camk2b	-1.75202	-1.23598	-0.42575	1.20866
												Nfia	-1.87782	-1.3031	0.012825	0.674027
												Klra8	-1.56759	-1.78137	0.72945	-0.05196
												Cks1b	2.75109	0.163597	-0.74933	-0.08576
												Hspe1	1.48884	1.64773	0.059611	-0.94626
												Cxcr3	2.57677	0.615459	-0.33142	-0.58955
												Tk1	2.72995	-0.0437	-0.69842	-0.24635
												Cct8	1.94382	1.20704	0.090253	-1.11699
												Gadd45b	0.815831	0.380832	-0.58129	-0.50518
												Smc2	2.40828	0.554217	-0.53092	-0.5592
												Cmc2	2.40951	1.08773	-0.78035	-0.32325
												Cdk1	2.71253	0.136497	-0.86699	-0.30239
												Plk1	2.69123	0.229381	-0.89275	-0.29116
												Cdc20	2.50002	0.72035	-1.00319	-0.193
												Gmnn	2.47787	0.239907	-0.66179	-0.64557
												Kif22	2.67157	0.068395	-0.91086	-0.44409
												Ggt1	2.54589	0.616717	-0.50322	-0.86453
												Cdca8	2.58332	0.349673	-1.02563	-0.3837
												Cenpf	2.62517	0.259238	-1.13144	-0.33196
												Cct7	2.14584	0.996522	-0.40746	-1.06603
												Cct6a	1.82594	1.30646	-0.22681	-1.25618
												Ifi47	1.31678	1.14881	-0.14688	-1.52072
												Prc1	2.35813	0.406705	-1.43638	-0.25235
												Trat1	0.746365	1.33576	-0.57984	-1.20428
												Fignl1	2.11165	-0.06359	-1.02248	-0.82879
												Hspa1b	1.32838	1.58269	-0.77756	-1.11914
												Hspa1a	0.965862	1.86949	-0.72262	-1.18963
												Atxn1	2.21368	0.551519	-1.10388	-0.80922
												Pycard	2.08383	-0.12708	-0.67667	-1.24536
												Polg2	0.852095	0.252426	-1.19911	-0.72397
												Lat	1.89405	0.799229	-0.82625	-1.17015
												Lck	1.75531	0.695013	-0.59522	-1.44292
												Cd3g	1.60941	0.59748	-0.9122	-1.21113
												Sh2d1a	1.89199	1.06696	-0.49003	-1.64343
												Cd8a	2.12526	0.537476	-1.16895	-0.97415
												Themis	1.36497	1.04296	-0.84456	-1.33611
												Gm11290	0.850281	0.233223	-0.51879	-1.75473
												Gm12840	0.446119	0.730381	-0.84682	-1.50517
												Armh2	0.580055	0.396604	-1.12253	-1.23844
												Trbc2	1.89367	0.426857	-0.9821	-1.40388
												Osbpl10	0.241293	0.007054	-1.50201	-0.89074
												Apol8	0.590837	-0.05402	-1.42365	-0.98403
												Thy1	2.25708	0.271298	-1.00948	-1.40509
												Ms4a4b	1.56343	0.478082	-1.13002	-1.29221
												Dgka	1.26963	1.04322	-0.85246	-1.61992
												Tox	1.51005	0.459472	-1.09771	-1.37563
												Mob3b	1.0711	0.904567	-0.79754	-1.69448
												Ms4a6c	1.22719	0.830359	-1.22079	-1.28253
												Ephx3	0.895417	0.374313	-1.23748	-1.30575
												1700029H14Rik	0.388531	0.300471	-1.30515	-1.24124
												Skap1	1.236	0.827633	-1.10477	-1.46572
												Pvt1	1.32223	1.41164	-1.27779	-1.30019
												Itgb7	2.13942	0.396442	-1.08547	-1.50041
												Ms4a6b	1.61655	0.772297	-1.09698	-1.49223
												Bcl11b	1.22596	1.01546	-1.223	-1.37303
												Gpr68	1.08992	0.536114	-1.21857	-1.40755
												Olfml3	0.206729	0.041378	-1.43766	-1.29285
												Mcph1	2.01533	0.725675	-1.56457	-1.23489
												Cd6	1.3128	0.692042	-1.24042	-1.56132
												Serpinc1	0.925923	0.222506	-1.46173	-1.34566
												2310016D23Rik	1.38396	0.145883	-1.54851	-1.28161
												Trac	1.64331	0.678357	-1.25005	-1.61294
												Oprm1	0.917401	1.41751	-1.40556	-1.46897
												Fxyd4	0.774279	0.55974	-1.81795	-1.09363
												Tpst2	1.34761	1.05182	-1.0299	-1.88263
												Trbc1	1.52247	0.137761	-1.50644	-1.47699
												Cd28	1.19243	0.284074	-1.63181	-1.40035
												Stk39	1.35136	0.514521	-1.25508	-1.79842
												Wnt4	0.69434	-0.05716	-1.55623	-1.06277
												Gm11579	1.3777	0.307257	-1.55676	-1.63432
												Gm4566	0.640997	0.391517	-1.72485	-1.49609
												Ccnb2	2.57208	0.109611	-1.19991	-0.47048
												Pik3r5	1.42434	0.397312	-1.8741	-1.50709
												Gm2682	0.260958	1.22977	-1.8636	-1.52164
												Incenp	2.54452	0.286957	-1.03307	-0.77405
