# Supplementary material for: Single-cell transcriptomics identifies altered neutrophil dynamics and accentuated T-cell cytotoxicity in tobacco-flavored e-cigarette-exposed mouse lungs
Source: eLife journal article supplement (doi:10.7554/elife.106380), 2025-04-01
Supplement: fig8-data1 [file Fig8- SD1.xlsx]

## Sheet: Fig8- SD1
Figure 8- Source Data 1: Z-score table showing significant (p<0.05) DEGs and top ten GO terms associated with the respective genes in the myeloid and lymphoid cluster from mouse lungs exposed to 5-day nose-only exposure to menthol-flavored e-cig aerosol when compared to air control as plotted in Figures 8A(i-ii) & 8B(i-ii).
						Myeloid Cluster									Lymphoid Cluster
		Air		Menthol			GO Terms	Fold Enrichment			Air		Menthol			GO Terms	Fold Enrichment
	Mphosph6	-1.94299	-1.74393	0.630168	0.529768		T-helper 1 cell cytokine production	6.20606		Sgms2	-0.95102	-1.23623	1.21405	1.2678		Cellular response to UV-A	5.96582
	Stap1	-1.85543	-1.40802	0.171497	0.241917		L-type voltage-gated calcium channel complex	5.58562		Cdk8	-1.16409	-1.09667	1.00691	0.880146		Regulation of TLR9 signaling pathway	5.96582
	Psmb8	-1.22944	-1.90852	1.56265	0.727169		Haptoglobin-hemoglobin complex	5.07783		Cmss1	-0.73769	-0.88383	1.11622	0.69666		Interstitial matrix	5.55318
	Napsa	-1.57329	-1.46815	0.670133	0.522504		Positive regulation of platelet activation	4.87619		Camk1d	-1.09499	-1.05535	0.660927	1.04551		Protein import	5.50691
	Gpr35	-1.1686	-1.8671	0.275814	1.02378		Alanine transport	4.68497		AY036118	-0.56854	-0.3224	0.716906	0.841088		Transforming growth factor beta activation	5.42347
	Hs6st1	-2.06294	-0.95898	0.09394	0.666355		ERBB4 signaling pathway	-5.39831		Gm42418	-0.49351	-0.76575	0.955757	0.573044		Mitotic DNA replication	-7.97538
	Arih2	-1.14811	-1.84893	1.0104	0.226651		Glutamate binding	-5.8354		Nfia	-1.87782	-1.3031	0.127638	1.06835		Pos. regulation of mitotic spindle assembly checkpoint	-8.27077
	Ltb4r1	-1.47228	-1.4641	0.485159	0.69665		Laminin complex	-5.86691		Klra8	-1.56759	-1.78137	0.096287	0.513329		Spindle elongation	-8.27077
	Intu	-1.58859	-1.32683	0.465962	1.23554		Protein-containing complex destabilizing activity	-6.36589		Ahsa1	1.38697	1.50428	-0.31235	-1.18509		Outer kinetochore	-8.5849
	Plbd1	-1.40719	-1.49622	0.617887	0.815167		Regulation of meiotic cell cycle phase transition	-6.47798								CMG complex	-11.5394
	Aif1	-1.40332	-1.49122	0.789058	-0.26815
	4930444A19Rik	-1.72882	-1.129	0.021234	1.26765
	Malt1	-1.46508	-1.39085	1.25571	0.203523
	Gpr132	-0.75842	-2.08628	0.659758	0.496478
	Dusp16	-0.96855	-1.85365	1.25855	0.295633
	Cyth1	-1.21082	-1.60371	0.454752	1.12396
	Smchd1	-0.84414	-1.93677	0.991701	1.19159
	Def6	-1.3155	-1.4518	0.265435	1.42487
	Cirbp	-1.27895	-1.46256	0.343035	1.02689
	Coro1a	-0.96156	-1.77128	0.485211	0.942667
	Adgrv1	-1.07039	-1.65445	0.378086	0.927728
	Negr1	-0.7723	-1.95205	0.423349	0.015112
	Ankrd44	-1.38877	-1.3194	0.785194	1.55817
	Txndc16	-1.61257	-1.08167	1.2839	1.54636
	Tiam2	-1.52486	-1.16306	0.896419	0.713104
	Dgkg	-1.18698	-1.47027	0.009811	1.08352
	Smad3	-1.27553	-1.38082	0.509472	0.962573
	Hexb	-1.25271	-1.39421	0.111542	0.76915
	Neurl3	-1.08654	-1.53902	0.655315	0.720986
	Ptpn18	-0.72943	-1.88512	0.53174	0.660464
	Esr1	-0.94417	-1.63449	0.993995	0.461276
	Dusp2	-0.8565	-1.70384	0.988725	0.702477
	Ssbp2	-0.92744	-1.61844	0.119119	1.22607
	Rubcnl	-1.25082	-1.28277	0.539188	0.954306
	Uvrag	-1.0784	-1.44938	0.719361	1.04772
	Hivep1	-1.50517	-1.01206	0.823661	1.23084
	Il1r2	-0.33251	-0.88173	0.826761	1.59972
	Lsp1	-1.21964	-1.29665	0.46504	1.22863
	Vav3	-0.87249	-1.63736	1.08792	0.790483
	Ptprj	-0.92661	-1.57868	0.476942	0.891334
	Prr7	-1.06435	-1.40627	0.687091	1.10014
	Fus	-1.03995	-1.40684	0.545871	1.22208
	Sik1	-1.01482	-1.42685	0.542806	1.2824
	Pip4k2a	-1.34125	-1.09616	0.850592	0.949612
	Oga	-1.14684	-1.28699	0.689957	1.64632
	Cxcl3	-0.83538	-0.59638	0.226304	2.11742
	Wnk1	-1.19909	-1.22341	0.842153	1.40319
	H3f3b	-1.16815	-1.24521	0.160278	0.983683
	Limd2	-0.84766	-1.55746	0.782512	0.874321
	Pik3ip1	-1.52209	-0.86671	0.443907	1.07245
	Clec1b	-1.43593	-0.93425	0.343571	1.23145
	Slc28a2	-0.70663	-1.64623	0.407846	1.28004
	Tut4	-0.91954	-1.41165	0.678849	0.940404
	Atp1a3	-1.06849	-1.2586	0.065696	1.25752
	Stat4	-0.68	-1.4279	0.396874	1.31952
	Slc9a9	-1.31114	-0.99713	0.987904	1.06733
	Arhgef18	-1.20133	-1.09481	0.470072	1.41821
	Usp38	-0.95039	-1.33842	0.759135	1.60942
	Frmd5	-1.32385	-0.96037	0.762516	0.600533
	Tctex1d2	-1.01914	-1.25106	0.672175	1.32643
	Tbc1d1	-1.34576	-0.89312	0.991398	1.34375
	Sgms1	-0.95424	-1.28011	0.441217	1.2661
	Ccrl2	-0.79185	-1.41972	0.414234	1.44991
	Cx3cr1	-0.38004	-1.37598	0.711818	0.308106
	Wfdc17	-0.46022	-1.74324	0.640273	1.58315
	Clip1	-0.85823	-1.31915	0.505101	1.50554
	Cmip	-0.81556	-1.35005	0.816943	1.20628
	Arhgap15	-0.97345	-1.18752	0.735345	1.39762
	Cfap43	-0.94429	-1.21127	0.606584	1.50334
	Gm16599	-1.04885	-1.09797	0.791957	0.993142
	Fbxo11	-0.69948	-1.44655	0.932861	1.12958
	Smim3	-0.98296	-1.15623	1.21922	1.51075
	Ifitm1	-0.16484	-1.05446	0.978422	1.40319
	Gm10851	-0.7722	-1.34374	0.821736	1.66969
	Cd52	-0.91098	-1.40066	0.720455	1.00814
	Lpcat2	-0.63497	-1.4427	0.779597	1.18691
	Sh3bp5	-1.02839	-1.04816	0.560619	1.05539
	Ptpn22	-0.82441	-1.22314	0.816135	1.1522
	Ctse	-0.43804	-1.58624	0.590804	1.28304
	Dennd4a	-0.47727	-1.52865	0.802287	1.18916
	Fmnl2	-0.9945	-1.00353	1.18607	0.698031
	Oasl1	-0.1316	-1.29316	0.978125	1.08913
	Gpr65	-0.53543	-1.44025	0.312142	1.09778
	Gm26740	-0.87552	-1.08483	1.06702	1.34418
	Gm31814	-0.50936	-1.44809	0.527952	1.33823
	Hist1h1c	-1.21604	-0.74114	0.314548	1.07693
	Vasp	-0.94222	-0.99976	0.799895	1.3144
	Pilra	-0.83426	-1.09587	0.553586	1.38184
	2310010J17Rik	-0.49428	-1.43547	0.646	1.32501
	Pfkfb3	-0.73947	-1.16429	0.748089	1.59168
	Jdp2	-0.99029	-0.90976	0.572728	1.18333
	Entpd3	-0.48884	-1.40248	1.42261	1.33585
	Slc12a6	-1.06889	-0.81939	1.11249	1.03173
	Slc22a15	-0.81684	-1.06751	0.341093	1.38782
	Cmss1	-0.7787	-1.09903	0.982356	0.780882
	Ncam1	-0.91042	-0.96698	1.4183	1.28559
	Cnn2	-0.55554	-1.3185	1.03502	1.0555
	Ninj2	-0.94761	-0.91957	0.713161	1.90007
	Klf3	-0.615	-1.2444	0.490743	1.09636
	Palm	-0.961	-0.89484	0.149523	1.15994
	Hmgb2	-0.4066	-1.4363	0.810451	1.31166
	Hdac9	-0.73952	-1.07111	2.39581	0.309019
	Syk	-0.60957	-1.19837	1.16695	1.64949
	Arhgap45	-0.81893	-0.98436	0.676956	1.53957
	Il1bos	-0.65877	-1.14005	0.524971	1.18296
	Casp3	-1.11143	-0.67961	0.95346	1.07526
	Gm1604a	-0.77968	-1.00625	0.336081	1.63702
	Nos1ap	-0.23001	-1.55309	0.847552	1.33158
	Tbc1d8	-0.44011	-1.33754	1.61948	0.854619
	Atp8b4	-0.88408	-0.88782	1.06118	1.48659
	Rdh11	-0.65445	-1.11388	0.63328	1.30887
	Ets2	-0.37408	-1.38662	0.438306	1.21884
	Gsn	-0.92994	-1.27938	1.10363	1.55392
	Elmsan1	-0.65257	-1.10231	0.544772	1.46185
	Prkcb	-0.12844	-1.62092	0.777733	1.25104
	Camk1d	-0.73185	-1.01036	1.19642	1.01576
	Itgam	-0.14314	-1.59559	0.406066	1.2861
	Epb41	-0.6849	-1.04553	0.812622	1.64694
	D16Ertd472e	-0.60745	-1.12251	0.928611	1.43505
	Stim2	-0.56371	-1.16614	0.75743	1.12973
	Elmo1	-0.86602	-0.8541	1.10028	1.73322
	Slc2a1	-0.35629	-1.3578	0.813651	1.55085
	4932438A13Rik	-0.53147	-1.17033	0.872853	1.53754
	Kctd12	-0.39705	-1.3037	0.940929	1.36662
	Rbks	-0.47572	-1.22056	0.639024	1.29348
	Tmem132b	-0.54474	-1.14327	0.828145	1.53997
	Pilrb2	-0.66507	-1.00742	0.899887	1.01833
	Sag	-0.55195	-1.10751	1.22193	1.3362
	Ncf2	-0.45794	-1.18504	0.800967	1.39546
	Cdk8	-0.8671	-0.7737	1.12858	1.10164
	Ceacam10	-0.40955	-1.23107	0.700629	1.08666
	Epcam	-1.58178	-0.05746	1.17688	0.676371
	Dnah17	-0.70347	-0.9102	0.276734	1.83574
	S100a6	-0.32513	-1.28782	0.694984	1.1076
	Slc2a6	-0.32888	-1.27526	1.05378	1.12601
	Gtdc1	-0.682	-0.91605	0.957657	1.57292
	Trp53inp1	-0.80722	-0.75526	0.463713	1.65807
	Gmfg	-0.25735	-1.27275	0.70069	1.23918
	A330023F24Rik	-0.59393	-0.92918	0.707723	1.58891
	Arrdc3	-0.61197	-0.88779	0.13456	1.70435
	Ralgps1	-0.47164	-1.02579	0.775959	1.49588
	Cwc25	-0.53746	-0.94461	0.753341	1.24239
	Spata13	-0.20138	-1.27134	1.04372	1.29478
	Rbm47	-0.71047	-0.75824	0.723285	1.74363
	Gng2	-0.30028	-1.16254	1.16787	1.00786
	Ccdc57	-0.3412	-1.10967	1.05286	1.26072
	Anxa11os	-0.19258	-1.25793	1.24248	0.605613
	Kdm7a	-0.35666	-1.09339	0.936206	1.44439
	AB124611	-0.07149	-1.36765	0.534367	1.25895
	Ralgapa1	-0.6719	-0.76673	0.66151	1.51633
	Cyfip2	-0.90058	-1.52293	0.47281	1.06687
	Sik3	-0.40364	-1.02598	0.936076	1.13219
	Fgd3	-0.37722	-1.04771	1.02567	1.29812
	Nt5c2	-0.93455	-1.04138	0.78496	1.90626
	Trim11	-0.75873	-0.66151	0.837037	1.61695
	Lars2	-0.69711	-0.71245	0.73413	0.775114
	Cux1	-0.3958	-1.01162	1.0551	1.49239
	Ifitm2	-0.10298	-1.3012	0.488674	1.29205
	Pglyrp1	-0.36073	-1.03989	0.649102	1.10634
	Mirt1	-0.48636	-0.90838	0.814337	1.21687
	Pde2a	-0.1244	-1.23609	0.569405	1.37244
	E230029C05Rik	-0.44073	-0.91518	1.17091	0.969443
	Gm16174	-0.67866	-0.67693	0.73754	1.14795
	Trub2	-0.54425	-0.79864	1.11546	1.09359
	AY036118	-0.68478	-0.65807	0.589277	0.838603
	Cass4	-0.39382	-0.94693	0.485135	1.22612
	Itpkb	-0.53352	-0.79382	1.00804	1.27844
	Chd7	-0.63577	-0.68089	0.739324	1.78057
	Ogfrl1	-0.64343	-0.6684	0.649624	1.42085
	Emb	-0.30571	-0.99677	0.652038	1.29653
	Rab11fip4	-0.44764	-0.84777	0.832061	1.05967
	Slc38a2	-0.33353	-0.95969	0.774941	0.877837
	AU019990	-0.31611	-0.96591	0.508078	1.59687
	Slc25a33	-0.19625	-1.07173	0.682478	1.26409
	Tmem156	-0.26697	-0.99966	0.686759	1.48546
	Cyp4f18	-0.13842	-1.125	0.998808	1.19356
	Fam114a1	-0.4914	-0.74707	0.842532	1.57375
	Selplg	-0.17353	-1.04836	0.804341	1.35424
	St3gal5	-0.87669	-1.24665	0.669705	1.08554
	Lst1	-1.1529	-1.36389	0.162679	1.20366
	Gfod1	-0.37148	-0.83313	1.06373	1.24326
	Wbp1l	-0.16363	-1.02351	0.730033	1.57331
	Rasgrp4	-0.66534	-0.51975	0.703492	1.48082
	Fbxo31	-0.43226	-0.72883	0.860468	1.33409
	Slfn4	0.255018	-1.39197	1.22134	0.885896
	Lbr	-0.08425	-1.03977	0.518318	1.44057
	Ksr1	-0.24774	-0.87614	1.07651	1.51993
	Rcsd1	-0.07137	-1.05043	0.649449	1.42777
	Atrn	-0.54452	-0.56078	1.29874	1.62867
	Hcst	-0.28505	-0.77985	0.770291	0.980484
	Rgs2	-0.2368	-0.82456	0.993206	0.79403
	Adam19	-0.04177	-0.95076	1.24379	1.65933
	Cd24a	-0.13719	-0.84202	0.614488	1.07103
	Cd300ld	-0.10375	-0.86896	0.779804	1.23669
	Sorl1	0.108728	-1.07042	0.767185	1.31158
	Zfand4	-0.08292	-0.86426	0.724787	1.3368
	Trpm2	0.0478	-0.98524	0.96691	1.23023
	Slfn1	-0.06105	-0.85381	0.970167	1.32537
	Ptgs2	0.118307	-1.03204	0.477993	1.16443
	Zfp652	-0.44632	-0.46741	0.737176	1.71595
	Babam2	-0.28901	-0.61526	1.05548	1.53554
	Gm42418	-0.3262	-0.57371	1.16795	0.817402
	Lmnb1	-0.03358	-0.83031	0.880022	1.23029
	Il18rap	0.1143	-0.96744	0.873817	1.29766
	Sirpb1b	0.051029	-0.83321	1.07502	1.46775
	Prim2	-0.65093	-0.1041	0.951793	1.96485
	Nudt4	-0.06024	-0.68988	0.688644	1.31544
	Gm12216	-0.18712	-0.56248	1.30824	0.830941
	Csf3r	0.091441	-0.82377	0.86818	1.45288
	4732465J04Rik	-0.01516	-0.69744	0.732591	1.25089
	St3gal6	-0.13074	-0.56148	0.762371	1.82714
	H2-Q10	-0.03131	-0.61399	0.712117	1.19757
	Igf1r	0.023585	-0.66849	0.931055	1.34956
	Gm26887	-0.01546	-0.61888	1.36832	0.82616
	Pip5k1b	0.414962	-1.01049	1.0012	1.16081
	Chrm3	-0.55814	0.036168	0.91813	1.36641
	Il1rap	0.229337	-0.7031	1.00179	1.28842
	Lyst	-0.14118	-0.2623	0.998782	1.30374
	Chst11	0.296491	-0.68486	1.00993	1.01111
	Nlrp12	0.175408	-0.41495	1.12086	1.37204
	Mertk	0.422577	0.687642	-0.7748	-0.96569
	Cd209d	0.954786	0.313921	-2.06855	-1.06532
	Wfdc10	1.55789	-0.20225	-1.00852	-1.06342
	Cd93	0.72743	0.908256	-0.43065	-0.31185
	Patj	0.620449	1.04259	-0.4854	-0.64923
	Cdh5	0.947225	0.849488	-0.33733	-0.81421
	Sema3e	0.78612	1.06782	-0.64098	-1.02672
	Adgrf5	0.936883	0.928428	0.133655	-0.6234
	Olr1	1.18172	0.708158	-0.9509	-0.66853
	Atp6v0d2	0.760679	1.16235	-0.81733	-0.62442
	Tc2n	0.425708	1.50428	-0.77351	-0.59953
	Gmds	0.802803	1.14979	-0.13539	-0.63236
	Slc38a6	0.898623	1.05882	-1.03572	-0.53741
	Gpr160	0.770336	1.22292	-1.44206	-0.94758
	Gm41307	0.858754	1.13797	-0.62303	-1.19797
	Clu	2.26837	-0.25865	-0.93112	-0.80088
	Rgl1	1.02349	1.0015	-0.87058	-0.9805
	Ackr3	0.763796	1.26902	-0.51611	-1.10429
	Egfem1	0.937792	1.1027	-0.3295	-0.4753
	Prag1	1.13836	0.923984	-0.94202	-0.98383
	Abcc5	0.673564	1.40897	-0.60287	-0.49293
	Htr2c	1.07995	1.01293	-0.54336	-0.59656
	Pdlim1	0.541799	1.57416	-1.14815	-1.14731
	Dab2	0.783922	1.37405	-0.77446	-1.05875
	Plcb1	0.777142	1.43413	-0.23814	-0.80473
	Cidec	0.619907	1.62265	-0.51702	-1.00098
	Dst	0.858353	1.40711	-0.53411	-0.60696
	Emilin1	1.2651	1.00627	-0.99827	-0.70837
	Acaa1b	1.4815	0.813269	-0.58715	-0.65747
	Eng	1.05681	1.24948	-0.17562	-0.81612
	Krt19	1.09536	1.22499	-0.27186	-1.08974
	Mmd	1.2785	1.04304	-0.57655	-0.66019
	Pparg	1.26085	1.06714	-0.3608	-1.25104
	Tmem100	0.99314	1.36017	0.065262	-1.06035
	Prss23	1.34735	1.01912	-0.33898	-0.85049
	Plet1	1.26799	1.09872	-0.62579	-0.76098
	Fbxl7	0.815664	1.55345	-0.70576	-0.27862
	Cgnl1	2.26707	0.104732	-0.89126	-1.19473
	Ednrb	2.11644	0.258222	-0.5095	-1.25973
	Dmd	1.70613	0.698703	-0.63762	-0.95671
	Prkca	0.684904	1.72879	-0.20997	-0.56117
	Egr2	1.40345	1.02359	-1.35112	-1.07735
	Ecm1	2.29644	0.146672	-0.94251	-0.87158
	Rusc2	1.32632	1.12109	-1.11296	-0.80869
	Ctla2a	1.10322	1.34516	-1.38786	-0.80176
	Pmp22	1.44732	1.00538	-0.78315	-2.07069
	Tspan32	1.58005	0.888383	-1.14604	-0.48935
	Fkbp1a	1.07262	1.44883	-0.9222	-1.37389
	Nova2	1.3516	1.17145	-0.5877	-1.67247
	Abcd2	1.12921	1.39889	-0.83525	-0.59247
	P2ry14	1.33747	1.19106	-0.77444	-1.16283
	Il6st	1.20836	1.33048	-1.59299	-1.42151
	Rhoj	1.37372	1.18021	0.023856	-0.85302
	Dip2c	0.980469	1.57348	-0.30355	-0.08429
	Spp1	1.7817	0.778619	-1.49518	-0.18862
	Sox17	0.986282	1.59248	-0.96729	-1.19471
	Gca	1.64124	0.940009	-0.43175	-0.39968
	Tmbim1	1.16099	1.45572	-0.79484	-0.85285
	Kitl	2.01238	0.635047	0.077299	-0.91618
	Pcdh1	1.69594	0.952081	-0.25602	-1.52446
	Tfec	1.38573	1.28931	-0.75628	-0.57323
	Slc9a3r2	1.33284	1.34537	0.247235	-1.1418
	Cyp4b1	1.41784	1.27438	-0.19136	-1.7869
	Esam	1.24636	1.45092	-0.84021	-1.00519
	Gm48293	1.35518	1.34481	-0.13024	-1.22768
	March4	2.08169	0.622926	-0.83472	-0.78983
	Icam2	1.79767	0.91317	0.077743	-2.00697
	Wwtr1	1.66266	1.07321	-0.38798	-0.59858
	Myc	1.37904	1.35915	-0.78219	-0.67372
	Mavs	1.22592	1.51883	-0.29392	-1.22403
	Ubfd1	1.46171	1.29665	-1.07799	-0.82411
	Ppid	1.45629	1.30382	-0.78903	-1.10826
	Coro2b	1.71857	1.0436	-0.61589	-0.6689
	Jcad	1.18549	1.58699	-0.09338	-0.73348
	Cacybp	1.38822	1.39548	-0.32972	-1.18075
	Hspa8	1.36125	1.44638	-0.05439	-1.06106
	Dpagt1	1.28415	1.54674	-1.21739	-1.16253
	Prx	1.49576	1.33821	0.033605	-1.25171
	Chordc1	1.26892	1.57079	0.022643	-1.20776
	Ptpn12	1.65736	1.18671	-0.41026	-1.08722
	Pwwp3a	1.22812	1.63091	-0.25071	-1.3793
	Hspb1	1.58668	1.32265	-0.66921	-1.72324
	Phldb2	1.64837	1.27937	-0.19826	-0.87118
	Ahsa2	1.49604	1.44944	-0.62674	-1.00406
	Crip2	1.41258	1.55742	0.110017	-1.30089
	Aqp1	1.57988	1.39217	-0.2663	-1.54422
	Smad6	1.26477	1.72743	-0.35401	-1.35088
	Thbd	1.96646	1.04497	-0.33069	-1.34097
	Timp3	1.52697	1.49669	0.121854	-1.55016
	Adgrl2	1.3671	1.6594	-0.64988	-1.0249
	E330020D12Rik	1.60176	1.42749	0.076256	-1.76725
	Mcam	1.57355	1.47759	-0.35625	-1.07703
	Ick	1.44121	1.62113	-0.86817	-1.1889
	Myzap	1.41551	1.65027	0.194799	-0.61899
	Mitf	2.04429	1.0424	-0.7555	0.347958
	Edn1	1.56418	1.71688	-0.625	-0.72278
	Manf	1.68027	1.52317	-0.17385	-0.92889
	Creb3l2	1.51281	1.69444	-0.29655	-1.20244
	Tbx3	1.84188	1.36891	0.037709	-1.60744
	Bcam	1.84433	1.37824	-0.4833	-1.31992
	Dnajb9	2.03857	1.18704	-0.37798	-0.84571
	Spns1	1.3666	1.87066	-0.91749	-0.2015
	Ltbp1	2.42017	0.872749	-0.13184	-0.29461
	Serpinh1	1.83634	1.55659	-0.39793	-0.85589
