# Supplementary material for: Single-cell transcriptomics identifies altered neutrophil dynamics and accentuated T-cell cytotoxicity in tobacco-flavored e-cigarette-exposed mouse lungs
Source: eLife journal article supplement (doi:10.7554/elife.106380), 2025-04-01
Supplement: fig9-data1 [file Fig9- SD1.xlsx]

## Sheet: Fig9- SD1
Figure 9- Source Data 1: Z-score table showing significant (p<0.05) DEGs and top ten GO terms associated to the respective genes in the myeloid and lymphoid cluster from mouse lungs exposed to 5-day nose-only exposure to Tobacco-flavored e-cig aerosol when compared to air control as plotted in Figures 9A(i-ii) & 9B(i-ii).
						Myeloid Cluster									Lymphoid Cluster
		Air		Tobacco			GO Terms	Fold Enrichment			Air		Tobacco			GO Terms	Fold Enrichment
	Mphosph6	-1.94299	-1.74393	0.440906	0.497336		T-helper 1 cell cytokine production	6.66143		Gm26827	-1.20221	-0.69272	1.077	1.83865		Cellular response to UV-A	6.33365
	Cd300c2	-1.68122	-1.6084	0.871944	0.837401		NK- cell degranulation	6.28078		Hexb	-0.97927	-1.11009	1.19037	1.65659		Positive regulation of platelet activation	5.42884
	Rpp21	-1.8843	-1.38273	1.09775	0.843469		Leukocyte migration involved in inflammatory response	5.23398		Klra4	-1.13428	-1.16225	1.21557	1.60335		Reg. of chemokine-mediated signaling	5.42884
	Stap1	-1.85543	-1.40802	-0.2959	0.951712		Neg regulation of CD4-, alpha-beta T cell proliferation	5.23398		Itga2	-1.42285	-0.91613	1.21779	1.57614		Complex of collagen trimers	5.08993
	Il10ra	-1.83667	-1.30902	0.356684	1.62086		Regulation of TLR9 signaling pathway	5.23398		Lars2	-0.90723	-0.53615	1.31647	1.45413		Interstitial matrix	5.05666
	Gm19951	-1.27135	-1.81631	1.16274	0.308363		DSB repair involved in meiotic recombination	-6.43807		Cmss1	-0.73769	-0.88383	1.09235	1.50958		Spindle elongation	-8.96
	Man1a	-1.67091	-1.41466	-0.31191	1.05353		Positive regulation of spindle checkpoint	-6.43807		Camk1d	-1.09499	-1.05535	1.15036	1.45101		L-type voltage-gated calcium channel complex	-9.12144
	Napsa	-1.57329	-1.46815	0.126832	1.60397		Intracellular phosphate ion homeostasis	-6.52168		Gm42418	-0.49351	-0.76575	1.08719	1.39642		Mitotic DNA replication	-9.6
	Hivep2	-2.04063	-0.99854	1.08648	1.20673		Response to sodium phosphate	-6.52168		Klri2	-1.2727	-1.3935	0.838642	1.61776		Outer kinetochore	-9.91461
	Gpr35	-1.1686	-1.8671	1.13389	0.654361		Protein-containing complex destabilizing activity	-7.48499		AY036118	-0.56854	-0.3224	1.0604	1.3606		CMG complex	-15.2024
	Egr1	-1.19039	-1.8407	0.723017	0.382148					Tob2	0.101679	-0.30981	1.21458	1.15512
	Mef2c	-1.53971	-1.46846	-0.33694	1.74701					Cdk8	-1.16409	-1.09667	0.720286	1.60954
	Csf1r	-1.17884	-1.80038	0.115361	1.69048					Carns1	-1.09188	-1.6061	0.752775	1.50672
	Ltb4r1	-1.47228	-1.4641	1.01426	1.23473					Lrmda	-1.81498	-0.70374	0.634214	1.6176
	Bri3bp	-1.60228	-1.32334	-0.02269	1.77305					Klra8	-1.56759	-1.78137	0.974704	1.20199
	Lifr	-1.4791	-1.43863	-0.23548	1.81866					Il18rap	-1.55006	-1.2352	0.914428	1.16002
	Intu	-1.58859	-1.32683	0.776679	0.58071					Tyrobp	-1.07468	-1.65629	0.714423	1.24158
	Plbd1	-1.40719	-1.49622	0.232847	1.44456					Fcer1g	-1.1671	-1.73335	0.691401	1.24332
	Aif1	-1.40332	-1.49122	0.316138	1.26686					Nckap5	-1.58259	-0.77513	0.739886	1.15384
	Clec12a	-1.0953	-1.78521	0.530519	1.62688					Nfia	-1.87782	-1.3031	0.649192	1.18327
	Tmem26	-1.66653	-1.19368	-0.83859	1.39927					Klrb1c	-1.22237	-1.56858	0.236946	1.51186
	4930444A19Rik	-1.72882	-1.129	1.38384	0.566088					Aoah	-1.2428	-1.78457	0.35201	1.39005
	Gpr132	-0.75842	-2.08628	0.882372	0.616725					Hmcn1	-1.39939	-0.75205	0.882042	0.801062
	Dusp16	-0.96855	-1.85365	0.613576	0.447657					Klra7	-1.54318	-1.30143	-0.02506	1.36381
	Fau	-1.16225	-1.65928	1.01606	0.943197					Klrb1b	-1.38494	-1.55272	0.590623	0.584517
	Cyth1	-1.21082	-1.60371	0.932933	0.345739					S100a10	2.34703	0.600172	-0.30607	-0.75519
	Arhgdib	-1.05768	-1.75663	1.06036	1.32872					Hspe1	1.48884	1.64773	-0.21961	-0.94581
	Tgfbr3	-1.39835	-1.40082	-0.1792	1.39512					Ran	2.62146	0.385447	-0.42199	-0.75412
	Pou2f2	-1.54447	-1.25367	-0.73797	1.35962					Ahsa1	1.38697	1.50428	-0.29808	-0.94083
	BC049352	-1.37509	-1.41612	1.37106	1.19019					Cct3	1.66356	1.39796	-0.34265	-0.96162
	Smchd1	-0.84414	-1.93677	0.630283	0.722468					Cct6a	1.82594	1.30646	-0.32032	-1.05544
	Birc3	-0.76446	-2.01095	0.976636	0.674651					St13	1.52319	1.4012	-0.25541	-1.19619
	Def6	-1.3155	-1.4518	1.18873	0.508882					Cct7	2.14584	0.996522	-0.86343	-0.61413
	Nop53	-1.13591	-1.62457	0.734231	1.53513					Cct8	1.94382	1.20704	-0.58872	-0.90155
	Ifitm3	-0.87409	-1.87391	0.092433	1.79991					Cct5	1.96752	1.01116	-0.42976	-1.10766
	Cirbp	-1.27895	-1.46256	0.688695	1.10724					Ldha	2.17799	0.614976	-0.21975	-1.38218
	1810058I24Rik	-1.03089	-1.70435	1.29996	1.06631					Lat	1.89405	0.799229	-0.77217	-0.93579
	Coro1a	-0.96156	-1.77128	0.657056	1.54888					Raly	2.09534	0.868845	-0.74109	-0.97483
	Eno3	-0.97257	-1.75581	-0.46665	1.57143					Ifi47	1.31678	1.14881	-0.47987	-1.23897
	Adgrv1	-1.07039	-1.65445	1.09388	0.952614					Cct4	1.65885	1.29678	-0.56489	-1.22643
	Negr1	-0.7723	-1.95205	0.444682	0.577902					Cybc1	1.4148	1.35957	-0.77811	-1.18762
	Gm2a	-1.70969	-1.00712	-0.05561	1.75609
	Arl4c	-1.39325	-1.31372	0.315982	1.42774
	Itga4	-1.35197	-1.35085	-0.39254	1.59788
	Txndc16	-1.61257	-1.08167	0.12896	0.635443
	Arhgef10l	-1.16	-1.53267	-0.60188	1.8722
	Insyn2b	-1.39153	-1.29711	0.977473	0.977959
	Tiam2	-1.52486	-1.16306	-0.20852	1.66979
	Sp100	-0.68106	-2.00339	0.658044	1.35276
	Dgkg	-1.18698	-1.47027	0.390637	1.44532
	Smad3	-1.27553	-1.38082	0.868544	1.22415
	Frat2	-1.11345	-1.54121	0.692939	1.44404
	Aoah	-0.95152	-1.70262	0.616297	1.60886
	Use1	-1.45432	-1.19459	1.31658	1.56017
	Rap1gap2	-1.2488	-1.3993	0.199491	1.76662
	Hexb	-1.25271	-1.39421	1.17285	1.21405
	Nr4a1	-0.97566	-1.66878	0.173565	1.36319
	Rps27	-1.05146	-1.57786	0.604103	1.0298
	Zswim4	-1.13039	-1.49662	1.21695	0.751349
	Neurl3	-1.08654	-1.53902	1.42241	1.00949
	Polr2l	-1.17611	-1.44424	0.608774	1.04908
	Ptpn18	-0.72943	-1.88512	0.673845	1.60502
	Spn	-1.14319	-1.45577	-0.69687	1.90491
	Dbnl	-1.11137	-1.48233	0.446075	1.64365
	Esr1	-0.94417	-1.63449	1.01463	1.41043
	Nhsl2	-1.20655	-1.35995	0.562268	1.91148
	Dusp2	-0.8565	-1.70384	0.68808	1.36079
	Ssbp2	-0.92744	-1.61844	1.03152	0.763646
	Hnrnpdl	-1.33401	-1.20633	0.557003	1.07522
	Ier2	-0.78616	-1.74679	1.09126	0.928849
	Arhgap4	-0.84902	-1.68388	1.02294	1.68838
	Uvrag	-1.0784	-1.44938	0.385271	0.9367
	Tent5c	-0.67614	-1.84516	1.10621	0.571053
	Lst1	-1.1529	-1.36389	0.771432	1.35968
	Lsp1	-1.21964	-1.29665	0.758591	1.19261
	Vav3	-0.87249	-1.63736	0.92754	1.07385
	Ifi27l2a	-0.18488	-2.32325	0.915258	1.14672
	Ptprj	-0.92661	-1.57868	0.034735	1.52782
	Ank	-1.88481	-0.59722	0.107095	1.50884
	Nin	-0.92973	-1.54908	0.34197	1.68761
	Prr7	-1.06435	-1.40627	1.00314	0.651082
	Sgsh	-0.9825	-1.47165	0.106916	1.98013
	Fus	-1.03995	-1.40684	0.737045	1.00325
	Nfatc2	-1.24674	-1.19547	0.740929	1.1202
	Sik1	-1.01482	-1.42685	0.671437	0.990333
	Ebi3	-0.7727	-1.66079	1.77616	0.649046
	Cyfip2	-0.90058	-1.52293	0.336957	1.61159
	H3f3b	-1.16815	-1.24521	1.27156	0.879843
	Limd2	-0.84766	-1.55746	0.848457	1.39908
	Pik3ip1	-1.52209	-0.86671	0.704038	1.27944
	Clec1b	-1.43593	-0.93425	1.01844	0.22827
	S100a4	-0.89956	-1.45583	-0.10007	1.89231
	Slc28a2	-0.70663	-1.64623	1.06897	0.980573
	Tmc6	-1.01533	-1.31589	0.443439	1.44298
	Tut4	-0.91954	-1.41165	0.835499	0.993732
	Atp1a3	-1.06849	-1.2586	0.717654	1.42188
	Cd52	-0.91098	-1.40066	1.46272	0.837334
	Slc9a9	-1.31114	-0.99713	0.372779	1.14918
	Arhgef18	-1.20133	-1.09481	0.709709	1.05371
	Bcl2	-0.82747	-1.46227	-0.37996	2.23815
	Usp38	-0.95039	-1.33842	0.838826	0.363967
	Synj1	-0.93831	-1.34982	0.806319	1.25372
	Frmd5	-1.32385	-0.96037	0.676882	0.017431
	Tctex1d2	-1.01914	-1.25106	1.16569	1.17709
	Gm32250	-1.02201	-1.23487	1.71126	0.541726
	Emilin2	-0.48426	-1.76587	0.743552	1.07621
	Tln1	-1.3986	-0.84496	0.511654	1.79826
	Tbc1d1	-1.34576	-0.89312	1.04893	0.970716
	Sgms1	-0.95424	-1.28011	0.703253	1.00505
	Ifitm6	-0.38806	-1.84544	0.495596	1.65095
	Ndufaf7	-0.58595	-1.63995	1.72907	0.439566
	Kif21b	-1.25493	-0.96174	0.389974	1.59269
	Ccrl2	-0.79185	-1.41972	1.20594	0.146898
	Gsn	-0.92994	-1.27938	1.29008	0.247531
	Wfdc17	-0.46022	-1.74324	0.896079	0.854037
	Utrn	-0.90435	-1.29442	0.937633	1.56447
	Fyb	-0.69515	-1.49671	0.395343	1.93982
	Ptprc	-1.1516	-1.03931	0.660096	1.33235
	Clip1	-0.85823	-1.31915	0.858134	0.948066
	Btg2	-0.54703	-1.62	1.4714	0.561717
	Cmip	-0.81556	-1.35005	1.1431	0.758889
	Cebpz	-0.89565	-1.26764	1.40966	0.393396
	Arhgap15	-0.97345	-1.18752	0.937369	1.07856
	Cfap43	-0.94429	-1.21127	1.35696	0.561853
	Gm16599	-1.04885	-1.09797	1.87901	0.200909
	Smim3	-0.98296	-1.15623	1.09751	0.285236
	Hes1	-1.27925	-0.8592	0.173565	1.66657
	Sema4d	-0.53214	-1.60419	1.00817	1.52045
	St3gal5	-0.87669	-1.24665	1.21455	0.954936
	Tpcn1	-0.7685	-1.34516	1.06361	1.98818
	Stat4	-0.68	-1.4279	1.31356	0.751167
	Rnf213	-0.69312	-1.40995	0.643905	1.72425
	H3f3a	-0.44967	-1.65261	1.51225	0.886883
	Ckap4	-0.54881	-1.54791	1.21371	0.784892
	Lpcat2	-0.63497	-1.4427	1.48555	0.748004
	Sh3bp5	-1.02839	-1.04816	1.19125	1.16277
	Ninj1	-0.28086	-1.7557	1.87293	0.304698
	Ctse	-0.43804	-1.58624	1.01877	1.08603
	Dennd4a	-0.47727	-1.52865	1.17362	0.70051
	Il1rl1	-1.10833	-0.8906	0.600017	0.973866
	Il1b	0.288478	-0.9195	1.38362	0.440053
	Tnfsf13b	-0.81164	-1.17501	1.70597	0.329339
	Gpr65	-0.53543	-1.44025	1.243	0.716601
	Tsc22d3	-0.57224	-1.39676	1.15893	1.29585
	Fam117a	-0.59862	-1.36551	0.542941	1.99499
	Gm26740	-0.87552	-1.08483	1.23779	0.57893
	Gm31814	-0.50936	-1.44809	1.19627	1.02363
	Hist1h1c	-1.21604	-0.74114	1.17986	1.04211
	Cd37	-0.42371	-1.52415	1.57454	0.6116
	Vasp	-0.94222	-0.99976	1.3541	0.647644
	Il1bos	-0.65877	-1.14005	1.7168	0.168122
	Pilra	-0.83426	-1.09587	1.22945	0.57257
	2310010J17Rik	-0.49428	-1.43547	1.11559	0.548903
	Jdp2	-0.99029	-0.90976	1.5079	0.450194
	Nfe2	-0.31615	-1.57641	1.3605	1.1081
	Cd72	-1.16958	-0.7197	0.023951	1.86018
	Slc12a6	-1.06889	-0.81939	1.03977	1.39061
	Slc22a15	-0.81684	-1.06751	1.35529	0.783651
	Kdm6b	-0.34964	-1.53035	1.3042	1.10551
	Fem1c	-1.07657	-0.80296	1.17295	0.877343
	Ncam1	-0.91042	-0.96698	1.48729	0.008349
	Cnn2	-0.55554	-1.3185	1.09642	1.19112
	Tmem176a	-0.76404	-1.09796	1.16968	0.144468
	Klf3	-0.615	-1.2444	1.31302	0.923294
	Palm	-0.961	-0.89484	1.7323	0.857219
	Ntng2	-0.40906	-1.43493	1.60331	0.877875
	Hmgb2	-0.4066	-1.4363	1.55547	0.551944
	Prdx6	-0.70753	-1.13366	1.72484	0.572861
	Son	-0.69873	-1.13787	1.56052	0.742783
	Prkce	-0.78543	-1.0415	1.14271	1.37938
	Tbc1d2b	-0.33506	-1.48092	1.50848	0.483699
	Arhgap45	-0.81893	-0.98436	0.828932	1.22369
	Cables1	-1.00657	-0.79588	1.84805	0.616729
	Cmss1	-0.7787	-1.09903	1.12924	1.50104
	Tyrobp	-0.41211	-1.38433	1.72974	0.587718
	Casp3	-1.11143	-0.67961	0.806861	1.25599
	Gm1604a	-0.77968	-1.00625	1.20667	0.449309
	Gm15564	-1.17104	-0.61465	1.20864	1.77952
	Nos1ap	-0.23001	-1.55309	1.32112	0.495067
	Ypel3	-0.3978	-1.38318	1.66664	0.854957
	Rdh11	-0.65445	-1.11388	1.57252	0.328263
	Ets2	-0.37408	-1.38662	1.36586	0.182735
	Cx3cr1	-0.38004	-1.37598	1.45024	1.60824
	Elmsan1	-0.65257	-1.10231	0.695156	0.990552
	Chn2	-0.87153	-0.87889	0.311094	1.69985
	Prkcb	-0.12844	-1.62092	1.22371	1.016
	Camk1d	-0.73185	-1.01036	0.897146	1.41382
	Adgre5	-0.54381	-1.19802	0.803479	1.93345
	Itgam	-0.14314	-1.59559	1.38445	0.893517
	Stim2	-0.56371	-1.16614	1.52787	0.677101
	Dusp1	-0.21314	-1.51376	1.14498	0.754775
	Rbks	-0.47572	-1.22056	1.61095	0.583839
	Tmem132b	-0.54474	-1.14327	1.19692	0.57557
	Card19	-0.09155	-1.59075	1.90358	0.665294
	Lrrc25	-0.01096	-1.66997	1.50509	1.42901
	Pilrb2	-0.66507	-1.00742	1.45599	0.766042
	Marcksl1	-0.03281	-1.63037	1.55132	0.637476
	Trem1	-0.26224	-1.39731	1.64105	0.159905
	Rrp1b	-0.60952	-1.04586	1.48427	0.50042
	Mgl2	-1.45366	-0.1967	1.04217	0.712376
	Ccdc180	-0.62602	-1.01832	1.308	0.931345
	Ncf2	-0.45794	-1.18504	1.54993	0.316556
	Cdk8	-0.8671	-0.7737	0.71307	1.47906
	Ceacam10	-0.40955	-1.23107	1.89708	0.305318
	Gm4107	-0.58407	-1.04343	1.78791	-0.04016
	Slc24a1	-0.71675	-0.90766	1.52579	1.06443
	Nckap5	-0.98657	-0.63547	0.29135	1.26591
	Dnah17	-0.70347	-0.9102	1.08061	0.624984
	S100a6	-0.32513	-1.28782	1.69109	0.297515
	Slc2a6	-0.32888	-1.27526	1.2228	0.643686
	Hacd4	-0.41785	-1.18546	1.46339	1.00415
	Gucy2c	-0.88272	-0.71911	1.52863	0.498005
	Acap1	-0.83652	-0.76449	1.72344	0.793616
	Gtdc1	-0.682	-0.91605	1.12342	0.675618
	Lgals9	-0.61562	-0.97425	1.58145	0.833277
	Irak3	-0.53638	-1.04578	1.4426	0.938877
	Lipe	-0.56131	-1.01577	1.01306	1.40648
	Cd209b	-0.98969	-0.56892	1.73508	1.1173
	Itprip	-0.19856	-1.34999	1.36702	0.523064
	Mafb	-0.38245	-1.15637	0.796402	0.384903
	Gmfg	-0.25735	-1.27275	1.51568	0.532122
	Rilpl2	0.182661	-1.71141	1.00463	1.74906
	Xylt1	-0.131	-1.38886	1.20494	0.861382
	Arrdc3	-0.61197	-0.88779	0.830056	1.1734
	Ralgps1	-0.47164	-1.02579	1.25502	0.562142
	Cwc25	-0.53746	-0.94461	1.44463	0.459168
	Spata13	-0.20138	-1.27134	0.382455	1.3125
	Fxyd5	-0.48285	-0.98474	1.5685	0.370969
	Gng2	-0.30028	-1.16254	1.36502	0.874939
	Ccdc57	-0.3412	-1.10967	1.41866	0.472318
	Anxa11os	-0.19258	-1.25793	1.69047	0.427748
	Adssl1	-0.10259	-1.34264	1.40092	1.06171
	AB124611	-0.07149	-1.36765	1.35781	0.800556
	Ralgapa1	-0.6719	-0.76673	1.55245	-0.02378
	Gm12840	-0.72797	-0.70934	0.434895	1.52561
	Pilrb1	-0.2179	-1.21271	1.32043	1.20124
	Sik3	-0.40364	-1.02598	1.40232	0.627352
	Hist1h4i	-0.82682	-0.60209	1.48066	0.849224
	Fgd3	-0.37722	-1.04771	1.00594	0.983893
	Oasl1	-0.1316	-1.29316	1.46129	0.603648
	Lars2	-0.69711	-0.71245	1.2332	1.49516
	Cux1	-0.3958	-1.01162	1.35214	0.305155
	Ccnjl	-0.94437	-0.46204	1.06145	0.565279
	Ifitm2	-0.10298	-1.3012	1.29968	0.471021
	Pglyrp1	-0.36073	-1.03989	1.69569	0.471768
	Mirt1	-0.48636	-0.90838	1.42034	0.603829
	Pxdc1	-0.66089	-0.7288	1.62956	1.18512
	Clec4e	0.016019	-1.39336	1.53525	0.482757
	Scnn1a	-0.07504	-1.29837	1.12923	0.941205
	Cbx4	-0.55663	-0.81086	1.17784	1.2505
	Pde2a	-0.1244	-1.23609	1.51713	0.476433
	Zfhx3	-0.80599	-0.55304	1.14375	1.69473
	E230029C05Rik	-0.44073	-0.91518	1.51384	0.670214
	Gm16174	-0.67866	-0.67693	1.6947	0.091227
	Trub2	-0.54425	-0.79864	1.50251	0.586853
	AY036118	-0.68478	-0.65807	1.297	1.27847
	Cass4	-0.39382	-0.94693	0.90288	1.44762
	Itpkb	-0.53352	-0.79382	0.806094	1.06553
	Asah2	-0.41644	-0.8982	1.76252	1.3411
	Ogfrl1	-0.64343	-0.6684	1.0863	0.715356
	Emb	-0.30571	-0.99677	1.24757	0.818356
	Rab11fip4	-0.44764	-0.84777	1.43224	0.905833
	Slc38a2	-0.33353	-0.95969	1.43841	0.737276
	Gm13822	-0.44177	-0.83367	1.70385	0.590585
	Gm14548	-0.26058	-1.01092	1.75423	0.433714
	Slc25a33	-0.19625	-1.07173	1.42022	0.248883
	Tmem156	-0.26697	-0.99966	0.949039	0.850007
	Cyp4f18	-0.13842	-1.125	1.43203	0.497175
	Anks1	-0.48911	-0.76823	1.63605	0.677182
	B3gnt5	-0.29296	-0.95985	1.43769	0.529522
	Gm35853	-0.59232	-0.65671	1.00037	1.53805
	Sun2	-0.3314	-0.90999	1.58474	0.91142
	Astl	-0.32391	-0.89759	1.88491	0.711214
	Ifitm1	-0.16484	-1.05446	0.926068	0.698883
	Il1r2	-0.33251	-0.88173	1.23022	0.263374
	Ppp1r15a	0.058199	-1.27237	1.21906	1.25751
	Gfod1	-0.37148	-0.83313	1.40623	0.196727
	Retreg1	-0.74172	-0.4604	1.33643	0.501509
	Midn	-0.26322	-0.93823	1.34014	0.649857
	Rasgrp4	-0.66534	-0.51975	1.26419	0.945376
	Pla1a	0.139013	-1.31703	1.53219	0.551666
	Ttc21a	-0.18627	-0.98914	2.31118	-0.01241
	Egr3	-0.21838	-0.95338	0.953906	2.3291
	Fbxo31	-0.43226	-0.72883	1.59829	0.260653
	AA467197	-0.86578	-0.27135	1.75795	0.423245
	Rac2	0.013419	-1.14659	1.64783	0.596686
	Lbr	-0.08425	-1.03977	1.46488	0.517135
	D830025C05Rik	-0.03488	-1.08769	1.13768	1.40587
	Rcsd1	-0.07137	-1.05043	0.928953	1.04565
	Rbm38	-0.19991	-0.91979	1.4062	1.13619
	Hcst	-0.28505	-0.77985	1.63533	0.50158
	Carns1	-0.11536	-0.94946	1.43465	0.731006
	Nkg7	-0.53644	-0.52711	0.462896	2.31678
	Rgs2	-0.2368	-0.82456	1.28778	0.968412
	Plk2	-0.1633	-0.89591	1.85272	0.788259
	Pgghg	-0.16194	-0.87577	1.37953	1.35775
	Lilra6	-0.05205	-0.96239	1.72175	0.780757
	Ints14	-0.48525	-0.49925	1.31808	1.06756
	Snx18	0.006258	-0.98859	1.58919	0.378853
	Cd24a	-0.13719	-0.84202	1.51454	0.624243
	Cd300ld	-0.10375	-0.86896	1.37522	0.601217
	Sorl1	0.108728	-1.07042	1.21334	0.693811
	Pi16	0.105688	-1.05573	1.35092	0.729257
	Zfand4	-0.08292	-0.86426	1.25303	0.802765
	Trpm2	0.0478	-0.98524	1.33357	0.488775
	Ptgs2	0.118307	-1.03204	1.30025	0.586606
	Padi4	-0.09148	-0.82009	1.90114	0.198173
	Gm42418	-0.3262	-0.57371	0.857258	1.45305
	Srgn	0.095544	-0.99062	1.6641	0.290831
	Dhrs7	-0.09117	-0.78248	1.86492	0.019339
	Lmnb1	-0.03358	-0.83031	1.55723	0.077419
	Il18rap	0.1143	-0.96744	1.30227	0.609178
	Slpi	-0.00376	-0.8476	1.7363	0.265551
	Nup107	-0.34892	-0.4771	1.33892	1.40326
	Csf1	-0.17825	-0.64625	1.22026	1.26417
	Cd300lb	0.051768	-0.80449	1.67427	0.390599
	Nudt4	-0.06024	-0.68988	1.55309	0.361101
	Gm12216	-0.18712	-0.56248	1.40759	0.750788
	1600002D24Rik	0.070958	-0.81377	1.3844	0.983386
	Csf3r	0.091441	-0.82377	1.03292	0.666313
	4732465J04Rik	-0.01516	-0.69744	1.21545	0.860589
	Gm11476	0.059116	-0.76097	1.95505	0.185321
	Cdh23	-0.13292	-0.54113	1.9164	0.879862
	Hsh2d	0.126199	-0.78862	1.36747	0.894849
	H2-Q10	-0.03131	-0.61399	1.14046	0.734544
	Igf1r	0.023585	-0.66849	1.31371	0.421538
	Gm26887	-0.01546	-0.61888	1.42696	0.703101
	Fmnl2	-0.9945	-1.00353	1.09763	1.01228
	Hp	0.202112	-0.82678	1.60366	0.256258
	Stpg4	-0.18665	-0.42219	1.8164	0.914405
	Mir142hg	-0.01675	-0.57063	1.57907	0.935496
	Gm13986	-0.12307	-0.36019	1.41877	0.705583
	Gm43661	0.13148	-0.57596	1.62457	0.572267
	Chst11	0.296491	-0.68486	1.51167	0.226751
	Asprv1	-0.04011	-0.32233	1.68169	0.267959
	Ripor2	0.348102	-0.69568	1.26542	0.721497
	Diaph3	0.213229	-0.00582	-1.30534	-0.78174
	Top2a	0.301813	-0.04343	-1.26249	-0.61886
	Cenpf	0.561756	-0.0842	-0.79364	-1.02533
	Serpinb1a	0.449199	0.058312	-1.31015	-1.26544
	Agmo	-0.50439	1.06019	-0.97185	-1.71719
	Cep112	0.136137	0.419947	-1.104	-1.20021
	Cit	0.56481	0.012484	-1.29351	-0.88762
	Nusap1	0.654136	-0.06474	-1.22611	-0.72283
	Knl1	0.146399	0.443593	-1.55658	-0.3814
	Cenpp	0.517125	0.13986	-1.66686	-1.04988
	Ehbp1	-0.11331	0.776043	-1.42764	-1.09788
	Atg4a	0.164157	0.531857	-1.46265	-1.45761
	Cdk1	0.824576	-0.12824	-1.35189	-1.01011
	Sdk1	0.511831	0.191123	-1.71344	-1.05404
	Stmn1	0.527495	0.193038	-1.28973	-1.03655
	Kif11	0.365644	0.360373	-1.48843	-0.39558
	Pclaf	0.611484	0.136478	-1.41221	-0.8264
	Ube2c	0.982019	-0.19073	-0.80961	-0.95305
	Ect2	0.717131	0.084137	-1.33661	-0.72515
	Dennd4c	-0.02611	0.845013	-1.40158	-1.66324
	Sec24a	-0.17626	1.04287	-1.21656	-1.54899
	Ncapd2	0.677174	0.198142	-1.28938	-0.88442
	Anln	0.480925	0.401838	-1.16761	-0.70641
	Rrm2	0.708717	0.180976	-1.57055	-1.17894
	Bckdhb	-0.21836	1.11184	-1.01414	-1.17277
	Fbxo5	0.672468	0.226615	-1.19188	-1.11436
	Mertk	0.422577	0.687642	-0.91456	-1.52716
	Zfp992	0.454049	0.658921	-1.48655	-1.37447
	Pim1	-0.41223	-1.52393	1.39245	0.289349
	Reps2	0.445696	0.734485	-0.86541	-2.01498
	Cpne8	0.454579	0.764862	-0.90298	-1.94979
	Sgo1	1.0755	0.218201	-1.15394	-0.63982
	Rad51b	0.814648	0.66936	-1.64734	-0.23013
	Atad2	0.403027	1.10012	-1.70886	-0.57591
	Chek2	0.420511	1.10782	-1.61709	-0.87261
	Ly75	0.664081	0.899786	-0.79493	-1.7146
	Mrc1	0.456821	1.1198	-0.38801	-2.07067
	Prdx1	1.11231	0.471288	-1.38838	-0.7541
	Prom1	0.774738	0.834545	-1.10472	-1.7553
	Gm20658	1.75989	-0.14921	-0.82512	-0.35614
	Tmem216	1.26654	0.345758	-0.49664	-1.79841
	C530008M17Rik	0.251003	1.36336	-0.71614	-1.71401
	Igf2bp3	1.73158	-0.0801	-1.11116	-1.51113
	Pnpla8	0.612724	1.03899	-0.48979	-2.24653
	Dock10	0.663291	0.993469	-0.95724	-1.68814
	Brip1	1.03816	0.619633	-1.44643	-1.17039
	Patj	0.620449	1.04259	-0.65062	-1.86639
	Abcg1	0.311512	1.40163	-1.07662	-1.69278
	Hebp1	0.641663	1.07822	-0.90502	-1.71135
	Ltc4s	0.647891	1.09524	-0.38229	-2.14303
	Cdk6	0.330706	1.41267	-1.08768	-1.51883
	Rora	0.176943	1.57392	-0.98825	-1.37756
	Tagln2	0.767617	0.996745	-1.02455	-1.41674
	Clec4n	1.59321	0.17326	-1.05615	-1.30042
	Nup210	0.435251	1.33485	-1.05791	-0.87235
	Hsd17b4	0.504438	1.27537	-0.7775	-1.85953
	Snx24	0.32231	1.46488	-1.10229	-1.93019
	Lima1	0.758345	1.02938	-0.88188	-1.471
	Grm8	1.26437	0.531903	-1.71349	-0.70484
	Dhrs3	0.998059	0.835915	-0.68226	-1.49663
	Sema3e	0.78612	1.06782	-0.5716	-1.40684
	Flvcr2	0.681755	1.17545	-0.58401	-2.22869
	Zfp934	0.609135	1.27003	-0.36735	-1.64902
	Olr1	1.18172	0.708158	-0.89185	-1.27635
	Pld1	0.784267	1.11545	-1.01336	-1.75985
	Atp6v0d2	0.760679	1.16235	-0.5829	-1.80903
	Tc2n	0.425708	1.50428	-0.90498	-1.3177
	Gpd1	0.965525	0.964937	-0.70509	-2.03896
	Bcar3	0.517833	1.43061	-0.63189	-1.52573
	AU020206	0.594725	1.35597	-0.58476	-1.72252
	Gmds	0.802803	1.14979	-1.04782	-1.51742
	Fam122b	1.15262	0.802415	-0.92696	-1.12372
	Slc38a6	0.898623	1.05882	-0.9372	-1.39354
	Atxn1	0.575679	1.39407	-0.75248	-1.93287
	Rock2	0.652806	1.32421	-1.08166	-1.34205
	Osbpl3	1.18415	0.80163	-1.67686	-0.37616
	Adipor2	0.682199	1.30476	-0.47565	-1.74747
	Mlph	1.47163	0.520958	-1.20086	-0.35291
	Gm41307	0.858754	1.13797	-0.27933	-1.28541
	Ppnr	0.324922	1.68023	-1.04783	-1.78736
	Rgl1	1.02349	1.0015	-0.47239	-1.27306
	Kcnip4	0.768684	1.26671	-0.44302	-2.04417
	Gpr156	1.21333	0.823766	-0.75614	-1.30622
	Egfem1	0.937792	1.1027	-1.07317	-1.2624
	Mical3	0.798021	1.25906	-0.7086	-1.67153
	Nrp2	1.29167	0.76721	-0.32967	-1.55625
	Trim29	0.301288	1.75939	-1.15808	-1.22368
	Prag1	1.13836	0.923984	-0.74581	-1.39464
	Shtn1	0.488818	1.58041	-1.23326	-1.52815
	C9	1.51124	0.56658	-0.27043	-1.14791
	Gm34907	0.526978	1.55337	-0.40654	-1.6876
	Abcc5	0.673564	1.40897	-0.9555	-1.42293
	Cks1b	1.4202	0.664486	-0.92433	-1.40992
	Rangap1	0.75987	1.33254	-1.20589	-1.12974
	Htr2c	1.07995	1.01293	-0.93065	-1.36535
	Tdrd3	0.477468	1.61797	-1.66566	-1.22855
	Capn15	0.72446	1.38199	-0.85504	-1.66635
	Xrcc5	1.13982	0.973807	-0.97355	-1.65998
	Dtnb	0.658324	1.46073	-1.49624	-1.16777
	Plin2	1.08529	1.0372	-0.50472	-1.84955
	Mccc2	0.88435	1.25041	-0.99262	-1.44835
	Pex11a	2.01153	0.130966	-1.37445	-0.66041
	Dab2	0.783922	1.37405	-0.04725	-1.46326
	Cd36	1.21037	0.952931	-1.53723	-0.88114
	Shc3	1.43111	0.760876	-1.32109	-1.33083
	Atp10a	0.889599	1.31136	-0.77823	-1.84713
	Siglecf	1.22839	0.972982	-0.6299	-1.84587
	Ddhd1	0.78415	1.41802	-1.46205	-1.06657
	Plcb1	0.777142	1.43413	-0.93136	-1.67055
	Frmd4a	0.870939	1.35563	-0.67162	-1.53633
	Ffar2	1.09906	1.12974	-0.46475	-1.55443
	Il18	0.319716	0.817633	-0.75963	-2.15714
	Coro6	1.67476	0.559693	-0.76988	-1.04771
	Cidec	0.619907	1.62265	-0.6043	-1.69143
	Tacc2	0.870078	1.38095	-1.20561	-0.85468
	Prkar2b	1.485	0.771733	-0.20255	-1.5459
	Gm4258	1.51129	0.751419	-1.22737	-0.61789
	Dst	0.858353	1.40711	-0.95183	-1.34561
	Afap1	0.758061	1.50937	-1.06808	-1.58865
	Mak	0.626945	1.66307	-0.39578	-1.73964
	Acaa1b	1.4815	0.813269	-0.78549	-1.59749
	Ubqln1	1.21875	1.0768	-0.74748	-2.04174
	Tbxas1	1.7031	0.598445	-0.45399	-1.39245
	Krt19	1.09536	1.22499	-0.66366	-1.32092
	Mmd	1.2785	1.04304	-0.43975	-1.60448
	Pparg	1.26085	1.06714	-0.75589	-1.07825
	Plekhg1	0.841883	1.50704	-0.69839	-1.71457
	Pla2g15	1.07605	1.27828	-0.5036	-1.41034
	Marco	1.84136	0.514952	-0.88496	-0.65628
	Nek1	1.01367	1.35046	-1.45479	-1.5
	Plet1	1.26799	1.09872	-0.22519	-2.04692
	Pla2g4a	1.03686	1.35283	-1.26087	-1.40707
	Smarcal1	0.922245	1.46979	-1.11347	-1.07811
	Cdc14b	0.59575	1.80142	-1.00136	-1.44094
	Dmd	1.70613	0.698703	-0.62124	-1.68237
	Prkca	0.684904	1.72879	-1.13426	-1.1384
	Gm46401	0.748664	1.66753	-0.22334	-1.53606
	Krt79	0.984402	1.43233	-0.30294	-1.88301
	Nr1h3	1.07547	1.34631	-0.7173	-1.19759
	Gm13546	0.715433	1.70646	-0.16738	-1.52282
	Afg1l	0.702432	1.73933	-1.27412	-0.6124
	Rusc2	1.32632	1.12109	-0.94108	-1.36667
	Camk2d	0.770788	1.68865	-0.96132	-1.81974
	Tspan32	1.58005	0.888383	-1.25441	-0.59649
	Matn2	0.907179	1.57411	-0.82668	-1.67274
	Asph	1.30801	1.18007	-0.86371	-1.60987
	Ms4a8a	0.981859	1.52851	-0.60349	-1.56129
	Prg4	1.89063	0.634982	-0.77362	-0.59959
	Abcd2	1.12921	1.39889	-0.47971	-1.03129
	P2ry14	1.33747	1.19106	-0.94347	-1.21721
	Gsap	1.06614	1.46627	-0.78549	-1.43446
	Acvr1b	1.17513	1.35939	-1.06976	-1.16695
	Tcf7l2	0.852515	1.69082	-0.62619	-1.60741
	Syn1	0.897106	1.64737	-0.40868	-1.61945
	Dip2c	0.980469	1.57348	-1.3459	-1.74075
	Ctsd	1.46376	1.09306	-0.32662	-1.68796
	Spp1	1.7817	0.778619	-0.61718	-1.20192
	Gca	1.64124	0.940009	-0.26655	-1.47523
	Cyb561a3	1.16547	1.43177	-0.4382	-1.85311
	Mreg	1.8956	0.709155	-1.03347	-0.9098
	AI504432	0.660085	1.94787	-0.59404	-1.6098
	Tmbim1	1.16099	1.45572	-0.46816	-1.55965
	Pvt1	1.04476	1.57533	-0.77664	-1.15992
	Sav1	1.16447	1.45667	-0.92921	-1.43726
	Rbm14	1.17896	1.44449	-1.07682	-0.79493
	Sel1l	1.33554	1.29143	-0.53682	-2.05007
	Mgll	0.853921	1.78819	-0.2188	-1.33498
	Cyb5b	1.31043	1.33283	-1.06176	-1.10989
	Zfp703	1.11685	1.52746	-0.35452	-1.7849
	Tfec	1.38573	1.28931	-1.00816	-1.23399
	Tardbp	1.36872	1.31654	-0.29444	-1.48052
	Sec24d	1.56575	1.12179	-0.4261	-1.51292
	Shroom3	1.97971	0.717323	-1.0789	-0.31818
	Snx27	1.53479	1.16351	-0.51981	-1.17699
	Gm48293	1.35518	1.34481	-0.40315	-1.30795
	Tcaf1	1.70703	0.996001	-0.73718	-0.97098
	4-Mar	2.08169	0.622926	-0.43691	-0.82765
	Adamts2	1.02679	1.6882	-0.43906	-1.5452
	Wwtr1	1.66266	1.07321	-0.62526	-1.67225
	Myc	1.37904	1.35915	-0.02316	-1.58791
	Mavs	1.22592	1.51883	-0.37139	-1.08866
	Rasal2	1.50323	1.24519	-0.55961	-0.9643
	Ubfd1	1.46171	1.29665	-0.30237	-1.10446
	Ppid	1.45629	1.30382	-0.64859	-1.16061
	Coro2b	1.71857	1.0436	-0.58043	-1.03883
	Cacybp	1.38822	1.39548	-0.20479	-1.09191
	Hspa8	1.36125	1.44638	-0.33206	-0.87211
	Krcc1	1.53486	1.27679	-0.53273	-1.13181
	Chordc1	1.26892	1.57079	-0.39144	-0.89459
	Ptpn12	1.65736	1.18671	-0.65988	-1.07452
	Snd1	1.54498	1.29916	-1.157	-1.14539
	P2ry13	2.016	0.837119	-0.96822	-0.90127
	Pwwp3a	1.22812	1.63091	-0.7912	-0.62744
	Zkscan3	1.08127	1.79404	-0.61998	-1.36989
	Edn1	1.56418	1.71688	-0.23629	-0.28406
	Cdc42bpa	1.38371	1.51908	-0.52322	-0.82963
	Hspb1	1.58668	1.32265	-0.09085	-0.49294
	Ahsa2	1.49604	1.44944	-0.12704	-1.00327
	Frk	0.863544	2.13759	-0.98856	-1.1936
	Rab32	1.68966	1.3122	-0.50914	-1.189
	Timp3	1.52697	1.49669	0.054782	-0.25579
	Adgrl2	1.3671	1.6594	-0.47906	-1.38566
	Plin3	1.95718	1.10169	-0.93282	-0.77493
	Mcam	1.57355	1.47759	0.054536	-1.35853
	Mmp19	1.54091	1.5101	0.017297	-1.40729
	Ick	1.44121	1.62113	-0.42029	-1.00849
	Mitf	2.04429	1.0424	-1.2855	-0.94527
	Manf	1.68027	1.52317	0.11791	-1.31905
	Creb3l2	1.51281	1.69444	-0.40603	-0.80222
	Tbx3	1.84188	1.36891	-0.3155	-0.36699
	Spns1	1.3666	1.87066	-0.53594	-1.3863
	Ptges	1.83826	1.40119	-0.46178	-0.88373
	1600014C10Rik	1.87475	1.3757	-0.33235	-1.26736
	Pex14	1.56354	1.33344	-0.89035	-0.94489
	Ltbp1	2.42017	0.872749	-0.55319	-0.23046
	Tgfb2	1.66525	1.66843	-0.20406	-0.49725
