# Supplementary material for: Single-cell transcriptomics identifies altered neutrophil dynamics and accentuated T-cell cytotoxicity in tobacco-flavored e-cigarette-exposed mouse lungs
Source: eLife journal article supplement (doi:10.7554/elife.106380), 2025-04-01
Supplement: fig9-figsupp1-data1 [file Fig9- SD2.xlsx]

## Sheet: Fig9- SD2
Figure 9- Source Data 2: Z score values of the levels of cytokine/chemokine obtained in per mg of protein from mouse lung tissue samples following 5-day nose-only exposure to PGVG, PGVG+Nic, fruit, menthol or tobacco-flavored e-cig aerosols as plotted in Figure 9-Supplement 1A.
		Air-female	Air-male	PGVG-female	PGVG-male	PGVG+Nic-female	PGVG+Nic-male	Fruit-female	Fruit-male	Menthol-female	Menthol-male	Tobacco-female	Tobacco-male
	CCL20	-0.15862	-0.4354	2.60521	0.457958	-1.03877	-0.88403	0.245971	-1.03134	0.329022	-0.53293	0.617275	-0.17434
	IL-1b	0.479813	0.657581	0.508731	1.32895	-1.85104	-1.8559	0.952853	-0.60828	0.150882	-0.17953	0.313649	0.102292
	CXCL5	-0.03937	1.22703	-0.26689	0.331229	-2.0118	-1.19238	1.79192	-0.10402	0.349674	-0.37319	0.542639	-0.25484
	TNF-a	-0.74003	0.360599	-0.19079	0.820007	-1.32194	-1.44645	1.2034	-0.91824	1.09404	-0.22756	1.48953	-0.12256
	GM-CSF	0.687541	0.935968	0.853944	0.721981	-1.97809	-1.25325	1.27293	0.570366	-0.39461	-0.61807	-0.15964	-0.63907
	CX3C	-0.71724	0.184463	-0.6512	1.68079	-0.91164	-1.59194	0.06867	-1.08447	0.694692	0.486655	1.26831	0.572916
	CCL1	0.067114	-0.08597	1.93524	0.976241	-0.74275	-1.51252	0.984735	-0.99526	0.75239	-0.74634	-0.02759	-0.60529
	CXCL13	-0.41592	-0.03488	2.58504	0.919657	-0.85006	-1.10094	-0.10392	-0.56975	0.338772	-0.86249	0.333967	-0.23948
	IL-16	0.502853	0.40632	-0.48863	0.006089	-1.28121	-1.71052	1.25888	-1.39281	0.439928	0.854134	0.289468	1.11549
	IFN-g	-0.29428	0.4961	0.267944	1.19328	-1.94589	-1.71938	0.824576	-0.79605	0.809576	0.439665	0.407389	0.317065
	CXCL10	0.353736	0.608	0.197176	0.872181	-1.86431	-1.75856	0.79375	-0.78286	1.1647	-0.21901	0.697281	-0.06208
	IL-2	0.789883	-1.20077	-1.27517	0.600238	-0.0056	0.180023	0.020504	0.625306	-1.48283	-0.89146	1.47168	1.1682
	CXCL11	0.284208	0.914865	0.637278	0.695563	-1.84568	-1.79813	0.781122	0.229287	0.713043	-0.54842	0.702805	-0.76595
	IL-6	-0.20609	0.267579	0.795987	1.19786	-2.41578	-0.16663	0.930654	-0.63065	0.640042	-0.32826	0.722126	-0.80683
	IL-4	0.924133	0.625904	0.317083	0.974732	-1.44333	-1.60241	0.767108	-0.69734	0.673118	-0.76074	1.09106	-0.86932
	CCL7	-0.42574	0.236894	-0.47838	0.431682	-1.24106	-1.11089	2.04656	-1.19472	0.327549	-0.29871	1.24344	0.463371
	CCL12	-0.82884	-0.83735	0.321954	0.442449	-0.38868	-1.23514	1.71491	-0.59444	-0.9011	0.691884	-0.12766	1.742
	MCP-1	0.496017	0.752122	0.808947	0.930345	-1.74456	-1.84003	1.13072	-0.30231	0.382169	-0.46021	0.423214	-0.57643
	CCL22	0.654728	-1.9752	-1.17836	-0.16266	0.659724	-0.81207	0.425898	0.010867	0.530885	0.248579	1.88484	-0.28724
	RANTES	2.79434	-0.55627	-0.52265	-0.81307	-0.13187	-0.8886	0.914439	-0.31457	-0.21715	-0.36754	-0.04423	0.147161
	IL-10	0.810357	0.480642	0.948751	1.38717	-1.91879	-1.45211	0.925353	0.141071	-0.03628	-0.49244	-0.22001	-0.57372
	KC	0.128815	0.821165	0.515584	0.84817	-1.98242	-1.80839	1.0954	-0.15316	0.716212	-0.01268	0.347446	-0.51615
	CCL27	0.916879	0.368871	-1.44554	1.78651	-0.93865	-0.79332	0.650493	-0.95649	0.194671	-0.19754	1.13737	-0.72325
	CCL17	-0.49176	-1.49638	-0.42857	1.24458	-1.82661	-0.64416	0.307121	0.454631	0.283604	0.540255	1.37891	0.678387
	MIP-3b	-0.09232	0.33258	0.665551	0.836933	-1.51134	-1.73517	1.96784	-0.50912	-0.39809	-0.03038	0.377057	0.096466
	CXCL16	0.741175	-0.70258	-1.88262	1.07008	-0.33124	-0.7301	0.297769	-0.78785	-0.19183	-0.22119	1.16864	1.56975
	CXCL12	0.251405	0.466266	-0.98736	0.897106	-1.18934	-1.50682	0.815005	-1.41152	1.29474	0.333472	0.88782	0.149225
	CCL24	-0.61899	0.281347	-1.07907	1.83385	-1.23916	-0.46764	-0.3217	0.710776	-1.23027	0.081934	1.14293	0.905992
	Eotaxin	0.147463	-0.13522	-0.76068	1.3259	-1.00797	-1.28196	0.682327	-0.02748	-1.41297	0.393124	0.267817	1.80965
	MIP-1b	0.522892	0.218232	0.210234	0.712802	-1.72726	-1.6248	1.57084	-0.10044	0.708945	-0.65495	0.816834	-0.65333
	MIP-1a	0.803853	-0.34955	-0.10819	-0.14906	-1.15502	-1.91624	2.04444	0.016499	-0.34763	0.094837	0.929006	0.137055
