# Supplementary material for: Single-cell transcriptomics identifies altered neutrophil dynamics and accentuated T-cell cytotoxicity in tobacco-flavored e-cigarette-exposed mouse lungs
Source: eLife journal article supplement (doi:10.7554/elife.106380), 2025-04-01
Supplement: fig9-figsupp1-data2 [file Fig9- SD3.xlsx]

## Sheet: Fig9- SD3
Figure 9- Source Data 3: Z score values of the gene expression of commonly dysregulated genes in the mouse lung tissue samples following 5-day nose-only exposure to PGVG, fruit, menthol or tobacco-flavored e-cig aerosols as compared to air controls as plotted in Figure 9-Supplement 1B.
		Air-female	Air-male	PGVG-female	PGVG-male	Fruit-female	Fruit-male	Menthol-female	Menthol-male	Tobacco-female	Tobacco-male
	Nfia	1.0854	0.914601	1.10193	0.553719	2.7438	3.23967	1.34711	2.14876	2.06336	2.66116
	Klra8	1.20307	0.796935	1.16858	0.572797	3.25287	2.63027	1.31418	1.81992	2.19732	2.61111
	Neurl3	1.10633	0.893673	0.888454	0.521853	1.83953	2.33007	1.6908	2.12133	3.48597	1.81474
	Stap1	0.978375	1.02163	1.13851	0.554062	1.8609	2.33781	1.22618	1.52659	1.79077	1.36061
	Cirbp	1.06943	0.930568	0.838593	0.755636	2.25789	3.45897	1.88278	3.1073	3.49865	2.49955
	Hist1h1c	0.931866	1.06813	0.794549	0.316562	2.03774	2.13207	1.39203	2.25576	3.04822	1.73061
	Egfem1	0.981846	1.01815	0.956476	0.382378	0.460311	0.60281	0.423243	0.480972	0.453779	0.242461
	Tfec	1.0381	0.961898	0.709059	0.319455	0.849357	0.658592	0.451173	0.587434	0.668685	0.368912
	Mitf	1.12515	0.874852	0.618745	0.281502	0.807059	0.857204	0.527709	0.815668	0.756053	0.483159
	Gmds	0.979614	1.02039	0.911442	0.364972	0.901359	0.841736	0.641824	0.69224	0.809075	0.424375
	Htr2c	1.03208	0.967923	0.783952	0.419445	0.839433	0.87142	0.577573	0.700099	0.839613	0.447456
