# Supplementary material for: Single-cell transcriptomics identifies altered neutrophil dynamics and accentuated T-cell cytotoxicity in tobacco-flavored e-cigarette-exposed mouse lungs
Source: eLife. 2026 Jan 29;14:RP106380. doi: 10.7554/eLife.106380 (PMC12854674; doi:10.7554/eLife.106380)
Supplement: Supplementary file 1. — (a) Table showing the QC parameters used before and after filtering and normalization of scRNA seq data. (b) Variable features with average log2 fold change and p value for genes in each cell cluster identified upon dimensionality reduction and clustering of 71,725 single cells from scRNA seq from treated and control samples. (c) Table showing the two-way ANOVA statistics for the cell frequencies identified through (a) scRNA seq analyses for general clustering using treatment and cell types as independent variables and (b) flow cytometric analyses using treatment and sex as independent variables. (d) (a) DESeq2 results showing the significant (p < 0.05) DEGs and (b) GO results of the DEGs in the myeloid cell cluster from mouse lungs exposed to 5-day nose-only exposure to PG:VG when compared to air control. (e) DESeq2 results showing the significant (p < 0.05) DEGs in the myeloid cell cluster from mouse lungs exposed to 5-day nose-only exposure to fruit-flavored e-cig aerosol when compared to air control. (f) GO analyses results of the (a) upregulated DEGs (log2 fold change >0.5) and (b) downregulated DEGs (log2 fold change <–0.5) in the myeloid cell cluster from mouse lungs exposed to 5-day nose-only exposure to fruit-flavored e-cig aerosols when compared to air control. (g) DESeq2 results showing the significant (p < 0.05) DEGs in the myeloid cell cluster from mouse lungs exposed to 5-day nose-only exposure to menthol-flavored e-cig aerosol when compared to air control. (h) GO analyses results of the (a) upregulated DEGs (log2 fold change >0.5) and (b) downregulated DEGs (log2 fold change <–0.5) in the myeloid cell cluster from mouse lungs exposed to 5-day nose-only exposure to menthol-flavored e-cig aerosols when compared to air control. (i) DESeq2 results showing the significant (p < 0.05) DEGs in the myeloid cell cluster from mouse lungs exposed to 5-day nose-only exposure to tobacco-flavored e-cig aerosols when compared to air control. (j) GO analyses results o [file elife-106380-supp1.xlsx]

## Sheet: File 1a
Supplementary File 1a: Table showing the QC parameters used before and after filtering and normalization of scRNA seq data
	Air		PGVG		Fruit		Menthol		Tobacco
	Female	Male	Female	Male	Female	Male	Female	Male	Female	Male
Pre-filter sample (cell) count	7314	7875	6096	2480	10264	9665	7276	7383	8672	7844
Post-filter sample (cell) count	7109	7642	5824	2359	9747	9226	6955	7036	8325	7502
Myeloid cell count after general clustering	1213	1116	864	368	1312	1556	1223	1431	1933	1074
Lymphoid cell count after general clustering	1843	1466	1384	641	2950	3118	1451	1928	1831	2546
Number of features (genes) analysed in the study	24777	24777	24777	24777	24777	24777	24777	24777	24777	24777

## Sheet: File 1b
Supplementary File 1b: Variable features with average log2 fold change and p value for genes in each cell cluster identified upon dimensionality reduction and clustering of 71,725 single cells from scRNA seq from treated and control samples.
p_val	avg_log2FC	pct.1	pct.2	p_val_adj	cluster	gene
0	3.16145	1	0.211	0	gCap	Ptprb
0	3.1081	0.993	0.241	0	gCap	Ldb2
0	3.05984	0.954	0.221	0	gCap	Sema3c
0	3.04877	0.977	0.322	0	gCap	Adgrl3
0	3.04425	0.985	0.209	0	gCap	Gpihbp1
0	2.80808	0.98	0.162	0	gCap	Tek
0	2.75766	0.978	0.191	0	gCap	Cd93
0	2.75114	0.986	0.197	0	gCap	Adgrl4
0	2.70912	0.903	0.146	0	gCap	Plvap
0	2.65046	1	0.438	0	gCap	Epas1
0	2.6033	0.996	0.257	0	gCap	Tspan7
0	2.59176	0.997	0.305	0	gCap	Tmem100
0	2.58753	0.956	0.186	0	gCap	Acer2
0	2.58739	0.993	0.334	0	gCap	Pltp
0	2.58001	0.9	0.188	0	gCap	Lyve1
0	2.56999	0.983	0.223	0	gCap	Cyyr1
0	2.53953	0.989	0.284	0	gCap	Ptprm
0	2.51969	0.892	0.128	0	gCap	Bmp6
0	2.50977	0.959	0.193	0	gCap	Cemip2
0	2.47382	0.971	0.272	0	gCap	Nckap5
0	2.46561	0.996	0.341	0	gCap	Flt1
0	2.45866	0.99	0.324	0	gCap	Hpgd
0	2.45016	0.902	0.132	0	gCap	Npr3
0	2.4494	0.893	0.171	0	gCap	Hmcn1
0	2.44694	0.998	0.408	0	gCap	Ctla2a
0	2.33374	0.994	0.355	0	gCap	Calcrl
0	2.31666	0.984	0.324	0	gCap	Klhl5
0	2.30745	0.99	0.3	0	gCap	Ptprg
0	2.30735	0.982	0.269	0	gCap	Itga1
0	2.30312	0.938	0.206	0	gCap	Pde3a
0	2.29381	0.998	0.445	0	gCap	Bmpr2
0	2.23614	0.875	0.155	0	gCap	Ccdc85a
0	2.23135	0.993	0.281	0	gCap	Eng
0	2.22133	0.908	0.273	0	gCap	Sorbs1
0	2.18981	0.84	0.086	0	gCap	Kit
0	2.17978	0.968	0.294	0	gCap	Plcb4
0	2.17874	0.801	0.131	0	gCap	Samd12
0	2.17666	0.981	0.344	0	gCap	Dock9
0	2.16482	0.999	0.328	0	gCap	Egfl7
0	2.14547	0.99	0.273	0	gCap	Aqp1
0	2.14532	0.924	0.206	0	gCap	Smad6
0	2.14419	0.96	0.305	0	gCap	BC028528
0	2.14284	1	0.321	0	gCap	Adgrf5
0	2.12979	0.893	0.185	0	gCap	Clec14a
0	2.12631	0.954	0.301	0	gCap	Plpp1
0	2.11222	0.893	0.236	0	gCap	Itga6
0	2.10979	0.845	0.176	0	gCap	Efnb2
0	2.10094	0.822	0.08	0	gCap	Sema3g
0	2.09754	0.938	0.236	0	gCap	Fendrr
0	2.08348	0.974	0.352	0	gCap	Pakap.1
0	2.05467	0.984	0.251	0	gCap	Slco2a1
0	2.05422	0.984	0.362	0	gCap	Rapgef5
0	2.01676	0.974	0.368	0	gCap	Dgkh
0	2.00783	0.956	0.26	0	gCap	Foxf1
0	1.99794	0.996	0.295	0	gCap	Cldn5
0	1.96137	0.984	0.279	0	gCap	Ace
0	1.95517	0.668	0.12	0	gCap	Cxcl12
0	1.94436	0.944	0.237	0	gCap	Rasip1
0	1.94308	1	0.687	0	gCap	Sptbn1
0	1.93425	0.96	0.234	0	gCap	Galnt18
0	1.91881	0.997	0.325	0	gCap	Ramp2
0	1.91331	0.768	0.089	0	gCap	Mcf2l
0	1.90986	0.718	0.064	0	gCap	Glp1r
0	1.90121	0.841	0.262	0	gCap	Akap12
0	1.89711	0.978	0.303	0	gCap	Cav1
0	1.88657	0.985	0.456	0	gCap	Heg1
0	1.88405	0.998	0.398	0	gCap	Cd36
0	1.88148	0.941	0.288	0	gCap	Ece1
0	1.87316	0.994	0.309	0	gCap	Acvrl1
0	1.86527	0.927	0.377	0	gCap	Sh3pxd2a
0	1.8651	0.997	0.266	0	gCap	Cdh5
0	1.84503	0.832	0.201	0	gCap	Tm4sf1
0	1.84491	0.869	0.253	0	gCap	Plcb1
0	1.82323	0.963	0.302	0	gCap	Thbd
0	1.79978	0.932	0.229	0	gCap	Afap1l1
0	1.79635	0.661	0.14	0	gCap	Adamts9
0	1.79601	0.919	0.337	0	gCap	Rin2
0	1.79131	0.95	0.336	0	gCap	Id1
0	1.78524	0.648	0.145	0	gCap	Fbxl7
0	1.76657	0.909	0.279	0	gCap	Rasal2
0	1.76576	0.538	0.072	0	gCap	Edn1
0	1.75313	0.839	0.254	0	gCap	Ptprk
0	1.74772	0.884	0.232	0	gCap	Nostrin
0	1.74341	0.992	0.544	0	gCap	Arhgap31
0	1.74274	0.883	0.184	0	gCap	Shank3
0	1.72646	0.771	0.191	0	gCap	Tinagl1
0	1.72623	0.753	0.169	0	gCap	Ncald
0	1.72385	0.775	0.225	0	gCap	Pxdc1
0	1.72179	0.814	0.187	0	gCap	Asap2
0	1.71853	0.905	0.246	0	gCap	Tspan9
0	1.71792	0.99	0.437	0	gCap	Ehd4
0	1.70949	0.708	0.14	0	gCap	Pcdh17
0	1.69307	0.72	0.206	0	gCap	Hilpda
0	1.69012	0.953	0.518	0	gCap	Atp1a1
0	1.68211	0.779	0.153	0	gCap	Cadm1
0	1.68031	0.87	0.183	0	gCap	Tie1
0	1.66736	0.691	0.141	0	gCap	Sema6d
0	1.66549	0.833	0.19	0	gCap	Efnb1
0	1.6649	0.955	0.298	0	gCap	Slc9a3r2
0	1.66409	0.926	0.522	0	gCap	Arl15
0	1.65726	0.88	0.257	0	gCap	Tjp1
0	1.62715	0.999	0.64	0	gCap	Clic4
0	1.62038	0.875	0.198	0	gCap	Podxl
0	1.61843	0.851	0.193	0	gCap	Clec1a
0	1.6079	0.807	0.224	0	gCap	Casz1
0	1.60211	0.865	0.242	0	gCap	Hecw2
0	1.60167	0.933	0.251	0	gCap	Esam
0	1.5934	0.974	0.395	0	gCap	S1pr1
0	1.59131	0.967	0.427	0	gCap	Zbtb16
0	1.58995	0.772	0.174	0	gCap	Vegfa
0	1.58413	0.952	0.305	0	gCap	Ly6c1
0	1.58249	0.778	0.194	0	gCap	Fzd4
0	1.58159	0.949	0.297	0	gCap	Cavin2
0	1.57834	0.976	0.357	0	gCap	Nfib
0	1.56596	0.841	0.24	0	gCap	Sash1
0	1.56215	0.924	0.412	0	gCap	Tmcc3
0	1.55813	0.789	0.246	0	gCap	Tmtc2
0	1.55524	0.962	0.47	0	gCap	Klf4
0	1.54162	0.804	0.242	0	gCap	Ptgfrn
0	1.53827	0.956	0.453	0	gCap	Cdk14
0	1.5369	0.859	0.264	0	gCap	Rhoj
0	1.52856	0.722	0.155	0	gCap	Rasgef1a
0	1.52604	0.916	0.374	0	gCap	4931406P16Rik
0	1.52452	0.793	0.173	0	gCap	Gata2
0	1.52298	0.973	0.503	0	gCap	Prkch
0	1.51843	0.917	0.285	0	gCap	Slc43a3
0	1.51766	0.887	0.238	0	gCap	Fmo1
0	1.51625	0.689	0.122	0	gCap	Cadps2
0	1.51493	0.853	0.202	0	gCap	Myzap
0	1.51252	0.899	0.475	0	gCap	Clec2d
0	1.51183	0.993	0.75	0	gCap	Qk
0	1.5111	0.757	0.14	0	gCap	Nova2
0	1.50808	0.962	0.471	0	gCap	Ctnna1
0	1.50547	0.891	0.298	0	gCap	Fmnl2
0	1.49328	0.972	0.519	0	gCap	Klf7
0	1.49111	0.637	0.089	0	gCap	Arhgef26
0	1.48947	0.905	0.303	0	gCap	Dlc1
0	1.4887	0.873	0.246	0	gCap	Arap3
0	1.48719	0.943	0.555	0	gCap	Numb
0	1.48618	0.835	0.233	0	gCap	Arhgap29
0	1.48435	0.835	0.255	0	gCap	Jup
0	1.48189	0.981	0.573	0	gCap	Jun
0	1.48038	0.897	0.221	0	gCap	Clic5
0	1.47353	0.886	0.463	0	gCap	Phlpp1
0	1.46708	0.775	0.22	0	gCap	S100a16
0	1.46431	0.749	0.196	0	gCap	Fnbp1l
0	1.46208	0.8	0.266	0	gCap	Pkp4
0	1.45572	0.846	0.243	0	gCap	Kank3
0	1.45177	0.611	0.078	0	gCap	Sox17
0	1.44464	0.902	0.376	0	gCap	Luzp1
0	1.44336	0.986	0.422	0	gCap	Ly6a
0	1.44232	0.653	0.154	0	gCap	Etl4
0	1.43836	0.995	0.529	0	gCap	Pecam1
0	1.43786	0.754	0.203	0	gCap	Mcc
0	1.42655	0.906	0.393	0	gCap	Tcn2
0	1.42422	0.869	0.34	0	gCap	Ctnnd1
0	1.42254	0.748	0.166	0	gCap	Erg
0	1.42197	0.628	0.144	0	gCap	Tcim
0	1.42144	0.58	0.065	0	gCap	Myrip
0	1.42068	0.758	0.166	0	gCap	Fgd5
0	1.42022	0.843	0.261	0	gCap	Cav2
0	1.42005	0.874	0.424	0	gCap	Syne1
0	1.4161	0.609	0.084	0	gCap	Palmd
0	1.41366	0.76	0.158	0	gCap	Adcy4
0	1.41303	0.979	0.628	0	gCap	Aldh2
0	1.41221	0.712	0.125	0	gCap	Ephb4
0	1.40853	0.933	0.61	0	gCap	Ppp1r2
0	1.40836	0.794	0.22	0	gCap	Jcad
0	1.40703	0.845	0.29	0	gCap	Afdn
0	1.40668	0.702	0.186	0	gCap	Sh3d19
0	1.40043	0.979	0.545	0	gCap	Tcf4
0	1.39588	0.704	0.185	0	gCap	Eml1
0	1.39268	0.863	0.343	0	gCap	Bcl2l1
0	1.38561	0.963	0.557	0	gCap	Fkbp1a
0	1.37743	0.624	0.152	0	gCap	Meis2
0	1.3674	0.96	0.395	0	gCap	Crip2
0	1.36562	0.817	0.289	0	gCap	Ptk2
0	1.36232	0.925	0.406	0	gCap	Arhgef12
0	1.35042	0.936	0.416	0	gCap	Cyth3
0	1.34937	0.989	0.494	0	gCap	Ifitm3
0	1.3465	0.764	0.213	0	gCap	Mcam
0	1.34441	0.88	0.554	0	gCap	Epb41
0	1.34356	0.774	0.288	0	gCap	Fas
0	1.34182	0.874	0.45	0	gCap	Id3
0	1.34124	0.76	0.247	0	gCap	Pard3
0	1.336	0.794	0.17	0	gCap	Tspan18
0	1.3327	0.807	0.304	0	gCap	Pard3b
0	1.32873	0.666	0.115	0	gCap	Notch4
0	1.32395	0.664	0.16	0	gCap	Adrb1
0	1.32248	0.987	0.647	0	gCap	Adgre5
0	1.32224	0.729	0.171	0	gCap	Hspa12b
0	1.32045	0.769	0.295	0	gCap	Atp2a3
0	1.30961	0.678	0.17	0	gCap	Adam15
0	1.30946	0.667	0.19	0	gCap	Rasgrp3
0	1.30364	0.827	0.366	0	gCap	Bst2
0	1.30325	0.766	0.227	0	gCap	Plxna2
0	1.30292	0.604	0.111	0	gCap	Sox7
0	1.30229	0.813	0.347	0	gCap	Dusp3
0	1.29796	0.583	0.132	0	gCap	Pcbp3
0	1.29704	0.663	0.146	0	gCap	Nsg1
0	1.29655	0.814	0.184	0	gCap	Sema6a
0	1.29364	0.663	0.127	0	gCap	Ushbp1
0	1.29273	0.649	0.182	0	gCap	Myo10
0	1.29024	0.426	0.092	0	gCap	4930554G24Rik
0	1.29	0.774	0.326	0	gCap	Kif13a
0	1.28528	0.643	0.147	0	gCap	Sox18
0	1.28509	1	0.976	0	gCap	Itm2b
0	1.28501	0.767	0.281	0	gCap	Cttnbp2nl
0	1.28152	0.932	0.337	0	gCap	Fermt2
0	1.28095	0.726	0.171	0	gCap	Parvb
0	1.27771	0.68	0.177	0	gCap	Arl4d
0	1.27674	0.987	0.787	0	gCap	Rap1a
0	1.27257	0.696	0.223	0	gCap	Emp1
0	1.27185	0.817	0.238	0	gCap	Lims2
0	1.26176	0.794	0.262	0	gCap	Cavin1
0	1.26034	0.753	0.205	0	gCap	Nes
0	1.2547	0.661	0.153	0	gCap	Rai14
0	1.25196	0.815	0.349	0	gCap	Sbf2
0	1.24918	0.772	0.274	0	gCap	Dennd3
0	1.24865	0.686	0.158	0	gCap	Cdc42ep1
0	1.24794	0.958	0.662	0	gCap	Sptan1
0	1.24643	0.813	0.238	0	gCap	Scn7a
0	1.24392	0.785	0.296	0	gCap	Wwc2
0	1.23933	0.896	0.248	0	gCap	Prex2
0	1.23498	0.743	0.242	0	gCap	Phldb2
0	1.22927	0.668	0.137	0	gCap	Arhgef15
0	1.2255	0.47	0.089	0	gCap	Ramp3
0	1.22076	0.696	0.161	0	gCap	Caskin2
0	1.21568	0.768	0.307	0	gCap	Rhoc
0	1.21482	0.515	0.082	0	gCap	Rgs9
0	1.21373	0.748	0.311	0	gCap	Elk3
0	1.2126	0.963	0.564	0	gCap	Prkce
0	1.21156	0.92	0.341	0	gCap	Col4a1
0	1.20638	0.728	0.294	0	gCap	Tubb2a
0	1.20572	0.667	0.199	0	gCap	Nbea
0	1.20387	0.653	0.17	0	gCap	Ica1
0	1.20167	0.794	0.27	0	gCap	Cbfa2t3
0	1.19808	0.701	0.218	0	gCap	Rtl8a
0	1.19766	0.729	0.24	0	gCap	Slfn5
0	1.19398	0.634	0.14	0	gCap	Sox13
0	1.18748	0.618	0.117	0	gCap	Ntn1
0	1.1871	0.665	0.169	0	gCap	Sorbs3
0	1.18433	0.741	0.287	0	gCap	Cdc42bpa
0	1.18223	0.538	0.091	0	gCap	Ackr3
0	1.18077	0.755	0.275	0	gCap	Cep85l
0	1.18071	0.753	0.183	0	gCap	Prx
0	1.17906	0.775	0.372	0	gCap	Ehd1
0	1.17703	0.74	0.285	0	gCap	Dock1
0	1.17599	0.8	0.235	0	gCap	Nkd1
0	1.17091	0.775	0.265	0	gCap	Nav1
0	1.17005	0.424	0.11	0	gCap	Plat
0	1.16999	0.663	0.178	0	gCap	Dock6
0	1.16974	0.548	0.094	0	gCap	Lrrc32
0	1.16253	0.698	0.205	0	gCap	Ripor1
0	1.16209	0.535	0.113	0	gCap	Zfp366
0	1.1613	0.868	0.55	0	gCap	Rdx
0	1.15706	0.576	0.139	0	gCap	Ctla2b
0	1.15441	0.669	0.162	0	gCap	Hyal2
0	1.15404	0.815	0.505	0	gCap	Slc3a2
0	1.15301	0.737	0.303	0	gCap	Itpripl2
0	1.1472	0.76	0.358	0	gCap	Anks1
0	1.14561	0.603	0.116	0	gCap	Ccm2l
0	1.14478	0.783	0.196	0	gCap	Sema3f
0	1.13678	0.837	0.484	0	gCap	Smad7
0	1.13217	0.739	0.287	0	gCap	Wwtr1
0	1.12866	0.93	0.524	0	gCap	Klf9
0	1.12835	0.724	0.305	0	gCap	Qsox1
0	1.12736	0.809	0.27	0	gCap	Adgrl2
0	1.12567	0.869	0.502	0	gCap	Mxd4
0	1.12518	0.519	0.065	0	gCap	Dll1
0	1.12428	0.613	0.191	0	gCap	Prickle1
0	1.12062	0.74	0.27	0	gCap	Ghr
0	1.12036	0.845	0.419	0	gCap	Xdh
0	1.11845	0.726	0.311	0	gCap	Map4k3
0	1.11813	0.619	0.198	0	gCap	St5
0	1.11698	0.852	0.3	0	gCap	Col4a2
0	1.11603	0.596	0.15	0	gCap	Srgap1
0	1.11282	0.586	0.195	0	gCap	Casc4
0	1.10712	0.875	0.49	0	gCap	Rin3
0	1.10357	0.641	0.189	0	gCap	Ddah2
0	1.09915	0.575	0.177	0	gCap	Adamts1
0	1.0963	0.671	0.324	0	gCap	Ier3
0	1.09465	0.644	0.268	0	gCap	Rnf144a
0	1.09075	0.736	0.35	0	gCap	Ccdc85b
0	1.07736	0.554	0.14	0	gCap	Yes1
0	1.07609	0.743	0.216	0	gCap	Mapt
0	1.07605	0.683	0.265	0	gCap	Carhsp1
0	1.07501	0.568	0.104	0	gCap	She
0	1.07423	0.464	0.195	0	gCap	Hdac9
0	1.07157	0.634	0.168	0	gCap	Csgalnact1
0	1.07121	0.788	0.275	0	gCap	Crim1
0	1.06909	0.887	0.61	0	gCap	Ctnnb1
0	1.06763	0.624	0.172	0	gCap	6430548M08Rik
0	1.06694	0.864	0.304	0	gCap	Anxa3
0	1.06658	0.694	0.252	0	gCap	Msrb3
0	1.06643	0.442	0.053	0	gCap	Hey1
0	1.06564	0.572	0.125	0	gCap	Pde9a
0	1.06524	0.776	0.442	0	gCap	Slk
0	1.06491	0.757	0.358	0	gCap	Ppp1r13b
0	1.0608	0.676	0.169	0	gCap	Tmcc2
0	1.05823	0.722	0.302	0	gCap	Hdac7
0	1.05179	0.607	0.202	0	gCap	Scarb1
0	1.05142	0.638	0.224	0	gCap	Arrb1
0	1.05132	0.673	0.286	0	gCap	Stmn1
0	1.04925	0.933	0.459	0	gCap	Rbpms
0	1.04289	0.758	0.354	0	gCap	Notch1
0	1.03742	0.633	0.172	0	gCap	Stmn2
0	1.03665	0.699	0.339	0	gCap	Gcc2
0	1.03328	0.697	0.243	0	gCap	Stard9
0	1.03138	0.386	0.055	0	gCap	Tmem252
0	1.03136	0.563	0.12	0	gCap	Npr1
0	1.03111	0.507	0.156	0	gCap	Gm49417
0	1.03094	0.733	0.337	0	gCap	AU020206
0	1.02942	0.656	0.248	0	gCap	Flnb
0	1.02762	0.443	0.058	0	gCap	Wfdc1
0	1.02687	0.51	0.094	0	gCap	Lama5
0	1.02675	0.935	0.82	0	gCap	Tax1bp1
0	1.02509	0.286	0.072	0	gCap	Iigp1
0	1.02409	0.598	0.163	0	gCap	Amotl1
0	1.02385	0.853	0.54	0	gCap	Pdlim5
0	1.02309	0.998	0.93	0	gCap	Ybx1
0	1.02301	0.841	0.529	0	gCap	Ccny
0	1.01941	0.72	0.411	0	gCap	Nf1
0	1.01448	0.682	0.292	0	gCap	Tmem184b
0	1.01225	0.578	0.141	0	gCap	2900026A02Rik
0	1.0097	0.701	0.313	0	gCap	Syne2
0	1.00914	0.609	0.292	0	gCap	Hes1
0	1.00786	0.917	0.383	0	gCap	Tns1
0	1.0067	0.587	0.151	0	gCap	Emcn
0	1.00585	0.462	0.072	0	gCap	Sh3tc2
0	1.00548	0.96	0.589	0	gCap	Itgb1
0	1.00489	0.563	0.194	0	gCap	Tbc1d8
0	1.00247	0.973	0.632	0	gCap	Pitpnc1
0	1.00217	0.52	0.129	0	gCap	Mid2
0	1.00124	0.659	0.297	0	gCap	Cd200
0	1.00077	0.398	0.081	0	gCap	Pknox2
0	0.999911	0.902	0.285	0	gCap	Icam2
0	0.998603	0.799	0.492	0	gCap	Pde4d
0	0.997598	0.554	0.125	0	gCap	Ripply3
0	0.995283	0.696	0.253	0	gCap	Ehd2
0	0.993732	0.647	0.181	0	gCap	Mfap2
0	0.99192	0.906	0.247	0	gCap	Prickle2
0	0.989719	0.855	0.521	0	gCap	Epb41l2
0	0.989656	0.518	0.114	0	gCap	N4bp3
0	0.987499	0.585	0.297	0	gCap	Mctp1
0	0.986264	0.827	0.421	0	gCap	Cdkn1a
0	0.985943	0.723	0.299	0	gCap	Raph1
0	0.985354	0.748	0.467	0	gCap	Xiap
0	0.985145	0.495	0.092	0	gCap	Tead4
0	0.985074	0.709	0.371	0	gCap	Pcnx
0	0.983372	0.381	0.034	0	gCap	Gna14
0	0.981796	0.72	0.273	0	gCap	Apbb2
0	0.979288	0.514	0.185	0	gCap	Sntb1
0	0.979162	0.815	0.441	0	gCap	Snrk
0	0.976041	0.649	0.204	0	gCap	Dach1
0	0.974654	0.996	0.843	0	gCap	Zbtb20
0	0.97388	0.998	0.793	0	gCap	Klf2
0	0.96914	0.758	0.186	0	gCap	Ecscr
0	0.968283	0.855	0.561	0	gCap	Smurf2
0	0.967835	0.926	0.585	0	gCap	Tuba1a
0	0.966508	0.591	0.232	0	gCap	Meis1
0	0.965956	0.677	0.249	0	gCap	9530026P05Rik
0	0.965895	0.697	0.295	0	gCap	Dennd5b
0	0.965488	0.779	0.274	0	gCap	Ankrd33b
0	0.964954	0.592	0.185	0	gCap	Lrp5
0	0.964844	0.404	0.074	0	gCap	Arhgap28
0	0.964478	0.575	0.242	0	gCap	Maff
0	0.960818	0.709	0.425	0	gCap	Ralgapa2
0	0.957388	0.759	0.4	0	gCap	Stim2
0	0.956686	0.83	0.54	0	gCap	Stt3b
0	0.956487	0.919	0.671	0	gCap	Add3
0	0.956241	0.521	0.108	0	gCap	Abcb1a
0	0.955648	0.932	0.605	0	gCap	Gnaq
0	0.954199	0.547	0.132	0	gCap	B4galt4
0	0.954006	0.619	0.249	0	gCap	Rapgef4
0	0.953858	0.6	0.21	0	gCap	Phactr1
0	0.953429	0.636	0.306	0	gCap	Arhgap5
0	0.952478	0.296	0.075	0	gCap	Vegfc
0	0.951741	0.588	0.15	0	gCap	Rapgef3
0	0.95044	0.763	0.348	0	gCap	Sh2d3c
0	0.949535	0.784	0.507	0	gCap	Git2
0	0.948952	0.369	0.047	0	gCap	Sox11
0	0.948137	0.596	0.219	0	gCap	Rbfox2
0	0.946513	0.65	0.254	0	gCap	Cdc42bpb
0	0.941926	0.554	0.165	0	gCap	Ttll7
0	0.941669	0.653	0.244	0	gCap	Cpne8
0	0.938201	0.884	0.666	0	gCap	Strn3
0	0.936213	0.518	0.143	0	gCap	Itga2
0	0.933188	0.671	0.231	0	gCap	Smagp
0	0.929652	0.791	0.432	0	gCap	H2-Q7
0	0.928889	0.679	0.276	0	gCap	Tanc1
0	0.928749	0.576	0.201	0	gCap	Plscr4
0	0.927093	0.443	0.129	0	gCap	Zfp503
0	0.926653	0.675	0.164	0	gCap	Rgs12
0	0.925553	0.538	0.131	0	gCap	Ppm1f
0	0.924566	0.588	0.197	0	gCap	Grasp
0	0.919983	0.429	0.081	0	gCap	Megf6
0	0.914975	0.636	0.263	0	gCap	Lrrc8a
0	0.914247	0.437	0.077	0	gCap	Adgra3
0	0.905403	0.466	0.111	0	gCap	Hoxa5
0	0.904879	0.735	0.321	0	gCap	Myo1d
0	0.902748	0.415	0.051	0	gCap	Gpr182
0	0.900672	0.597	0.252	0	gCap	Frmd4b
0	0.899379	0.456	0.164	0	gCap	Specc1
0	0.898038	0.497	0.125	0	gCap	Thsd1
0	0.896217	0.667	0.301	0	gCap	Sec14l1
0	0.894587	0.828	0.592	0	gCap	Arglu1
0	0.893866	0.756	0.327	0	gCap	Agap1
0	0.890354	0.714	0.408	0	gCap	Elovl5
0	0.890114	0.651	0.188	0	gCap	Lpl
0	0.88772	0.578	0.255	0	gCap	Arl4a
0	0.887596	0.463	0.095	0	gCap	Jag2
0	0.887159	0.571	0.175	0	gCap	Map3k6
0	0.886108	0.576	0.207	0	gCap	Marveld1
0	0.884149	0.545	0.163	0	gCap	Rtl8b
0	0.883452	0.936	0.386	0	gCap	Timp3
0	0.878004	0.483	0.119	0	gCap	Tnfsf10
0	0.877045	0.784	0.451	0	gCap	Mapk3
0	0.877014	0.811	0.376	0	gCap	Nedd4
0	0.874903	0.635	0.293	0	gCap	Acer3
0	0.873481	0.801	0.507	0	gCap	Actn4
0	0.873101	0.444	0.064	0	gCap	Mmrn2
0	0.872761	0.502	0.138	0	gCap	Coro2b
0	0.872332	0.412	0.09	0	gCap	Dll4
0	0.87223	0.645	0.263	0	gCap	Nckap1
0	0.86983	0.552	0.216	0	gCap	Lifr
0	0.863404	0.613	0.223	0	gCap	Tns2
0	0.862405	0.436	0.142	0	gCap	Pdgfd
0	0.86125	0.529	0.174	0	gCap	Lrrc8b
0	0.859911	0.284	0.031	0	gCap	Chrm2
0	0.858267	0.628	0.329	0	gCap	Adrb2
0	0.857474	0.499	0.113	0	gCap	Robo4
0	0.856737	0.571	0.223	0	gCap	Taok2
0	0.850635	0.676	0.356	0	gCap	Abhd2
0	0.85023	0.436	0.077	0	gCap	Tmeff1
0	0.849848	0.379	0.061	0	gCap	Shroom2
0	0.849127	0.787	0.468	0	gCap	Hpcal1
0	0.848961	0.577	0.18	0	gCap	Cracr2b
0	0.844543	0.508	0.184	0	gCap	Gkap1
0	0.843956	0.575	0.255	0	gCap	Piezo1
0	0.843647	0.941	0.665	0	gCap	Klf3
0	0.841629	0.592	0.226	0	gCap	Pitpnm2
0	0.840371	0.864	0.584	0	gCap	Msi2
0	0.839155	0.944	0.79	0	gCap	Myl12a
0	0.839138	0.982	0.548	0	gCap	Ifitm2
0	0.837796	0.917	0.746	0	gCap	Top1
0	0.837394	0.994	0.904	0	gCap	mt-Nd3
0	0.834879	0.411	0.077	0	gCap	Efna1
0	0.832369	0.7	0.413	0	gCap	Phc2
0	0.831722	0.546	0.201	0	gCap	Rnf141
0	0.826086	0.384	0.14	0	gCap	Glis3
0	0.825705	0.919	0.691	0	gCap	Asap1
0	0.823251	0.729	0.478	0	gCap	Rapgef1
0	0.822992	0.549	0.209	0	gCap	Arhgap23
0	0.822819	0.971	0.779	0	gCap	Ucp2
0	0.822559	0.96	0.797	0	gCap	Sec62
0	0.822506	0.695	0.323	0	gCap	Rras
0	0.822368	0.586	0.27	0	gCap	Zbtb4
0	0.822292	0.651	0.334	0	gCap	Prkd2
0	0.821496	0.416	0.1	0	gCap	Eogt
0	0.819912	0.503	0.242	0	gCap	Mlec
0	0.819466	0.634	0.164	0	gCap	Eln
0	0.816553	0.819	0.395	0	gCap	Dst
0	0.816392	0.695	0.431	0	gCap	Sbds
0	0.815139	0.358	0.055	0	gCap	Gja4
0	0.812326	0.71	0.415	0	gCap	Plec
0	0.811595	0.492	0.159	0	gCap	Pdgfb
0	0.810768	0.356	0.103	0	gCap	Prrg1
0	0.810438	0.698	0.343	0	gCap	Cpd
0	0.806942	0.407	0.079	0	gCap	Il17rd
0	0.806884	0.491	0.153	0	gCap	Amotl2
0	0.805645	0.714	0.176	0	gCap	Pcdh1
0	0.804716	0.68	0.377	0	gCap	Cyfip1
0	0.80364	0.997	0.939	0	gCap	Gnai2
0	0.80364	0.515	0.149	0	gCap	Gjc1
0	0.802947	0.983	0.892	0	gCap	Myl12b
0	0.802363	0.742	0.521	0	gCap	S100a13
0	0.801517	0.469	0.107	0	gCap	Unc45b
0	0.798478	0.459	0.133	0	gCap	Zbtb46
0	0.797993	0.526	0.183	0	gCap	Epn2
0	0.797603	0.571	0.187	0	gCap	Stard8
0	0.797429	0.774	0.517	0	gCap	Map4
0	0.796741	0.352	0.046	0	gCap	Grrp1
0	0.794883	0.383	0.108	0	gCap	Ptgs1
0	0.792404	0.6	0.226	0	gCap	Impdh1
0	0.790723	0.753	0.498	0	gCap	Map4k4
0	0.790405	0.52	0.174	0	gCap	Stx3
0	0.788752	0.618	0.311	0	gCap	Daam1
0	0.788072	0.499	0.187	0	gCap	Osbpl2
0	0.786169	0.552	0.262	0	gCap	Mrtfb
0	0.782594	0.683	0.441	0	gCap	Bnip2
0	0.782323	0.379	0.12	0	gCap	Prkd1
0	0.782016	0.336	0.037	0	gCap	Hoga1
0	0.779302	0.518	0.143	0	gCap	Pxdn
0	0.777766	0.587	0.301	0	gCap	Aph1a
0	0.77753	0.985	0.949	0	gCap	Cmss1
0	0.776323	0.968	0.778	0	gCap	Rbms1
0	0.77582	0.375	0.069	0	gCap	Ccdc9b
0	0.773819	0.543	0.25	0	gCap	Arhgef7
0	0.770813	0.695	0.366	0	gCap	Ttc28
0	0.768285	0.583	0.187	0	gCap	Fgfr3
0	0.767905	0.558	0.179	0	gCap	Sgip1
0	0.767855	0.899	0.532	0	gCap	Tspan13
0	0.76714	0.7	0.404	0	gCap	Hip1
0	0.765929	0.339	0.055	0	gCap	Prss12
0	0.765827	0.946	0.788	0	gCap	Gnb1
0	0.765246	0.384	0.102	0	gCap	Unc13b
0	0.764155	0.39	0.076	0	gCap	Uaca
0	0.762848	0.317	0.047	0	gCap	Slc24a4
0	0.76197	0.464	0.166	0	gCap	Plxna4
0	0.761164	0.623	0.323	0	gCap	Hmbox1
0	0.760007	0.65	0.393	0	gCap	H2-Q4
0	0.757129	0.4	0.103	0	gCap	Fam171a1
0	0.755059	0.529	0.223	0	gCap	Fam219a
0	0.754731	0.859	0.586	0	gCap	Zeb1
0	0.753815	0.673	0.421	0	gCap	Nedd4l
0	0.753059	0.489	0.153	0	gCap	Lysmd2
0	0.750236	0.638	0.369	0	gCap	Lrrc8c
0	0.748962	0.365	0.05	0	gCap	Tmem44
0	0.748856	0.417	0.084	0	gCap	Flt4
0	0.748036	0.681	0.388	0	gCap	Tpst2
0	0.747004	0.275	0.039	0	gCap	Kcnh1
0	0.746987	0.433	0.109	0	gCap	Spns2
0	0.746873	0.384	0.096	0	gCap	Maoa
0	0.746825	0.761	0.431	0	gCap	Dpysl2
0	0.746509	0.906	0.682	0	gCap	Mef2a
0	0.74551	0.524	0.201	0	gCap	Zcchc14
0	0.745388	0.507	0.237	0	gCap	Gm12216
0	0.745134	0.581	0.239	0	gCap	Gpr146
0	0.742459	0.421	0.131	0	gCap	Pawr
0	0.741652	0.968	0.602	0	gCap	Aff3
0	0.741539	0.506	0.142	0	gCap	Myct1
0	0.74068	0.612	0.338	0	gCap	Lgals9
0	0.736743	0.612	0.317	0	gCap	Rab12
0	0.73626	0.317	0.025	0	gCap	Aplnr
0	0.733792	0.617	0.237	0	gCap	Mxra7
0	0.733345	0.788	0.441	0	gCap	Marcks
0	0.732198	0.504	0.236	0	gCap	Plk2
0	0.731578	0.467	0.153	0	gCap	Tlnrd1
0	0.730433	0.732	0.28	0	gCap	Shroom3
0	0.728456	0.654	0.361	0	gCap	Capn2
0	0.728075	0.443	0.124	0	gCap	Cdc42ep4
0	0.727348	0.672	0.383	0	gCap	Ybx3
0	0.727212	0.615	0.244	0	gCap	Clstn1
0	0.724309	0.548	0.219	0	gCap	Abi3
0	0.723933	0.447	0.112	0	gCap	Bvht
0	0.718669	0.554	0.191	0	gCap	Krt80
0	0.715293	0.558	0.314	0	gCap	Map4k2
0	0.713901	0.75	0.339	0	gCap	Pam
0	0.713157	0.522	0.231	0	gCap	Myo6
0	0.71292	0.623	0.342	0	gCap	Ccser2
0	0.712711	0.926	0.771	0	gCap	Sh3glb1
0	0.711465	0.38	0.096	0	gCap	Tox2
0	0.711256	0.53	0.224	0	gCap	Ndst1
0	0.710271	0.466	0.226	0	gCap	Tle1
0	0.710162	0.812	0.301	0	gCap	Pmp22
0	0.709099	0.703	0.495	0	gCap	Ano6
0	0.708288	0.527	0.239	0	gCap	Ephx1
0	0.70801	0.65	0.357	0	gCap	Map7d1
0	0.705376	0.356	0.09	0	gCap	Zfp641
0	0.705187	0.762	0.507	0	gCap	Rapgef2
0	0.704415	0.673	0.416	0	gCap	Rab11a
0	0.70243	0.3	0.043	0	gCap	Mmp28
0	0.702232	0.526	0.221	0	gCap	Stard13
0	0.69947	0.648	0.421	0	gCap	Cflar
0	0.699441	0.741	0.525	0	gCap	Dync1h1
0	0.698329	0.816	0.585	0	gCap	Fam117b
0	0.697806	0.478	0.184	0	gCap	Fmnl3
0	0.695848	0.437	0.136	0	gCap	Cyb561
0	0.695793	0.359	0.094	0	gCap	Kcnq1
0	0.695262	0.597	0.274	0	gCap	Mtus1
0	0.693993	0.62	0.383	0	gCap	Tulp4
0	0.693351	0.267	0.032	0	gCap	Tox3
0	0.692838	0.624	0.36	0	gCap	Csnk1e
0	0.692766	0.772	0.555	0	gCap	mt-Nd4l
0	0.692383	0.521	0.191	0	gCap	Frmd4a
0	0.692378	0.478	0.172	0	gCap	Plscr3
0	0.691004	0.662	0.431	0	gCap	Ktn1
0	0.688934	0.385	0.086	0	gCap	Ptpn14
0	0.688089	0.692	0.495	0	gCap	Setd5
0	0.687572	0.91	0.776	0	gCap	Gphn
0	0.685032	0.555	0.285	0	gCap	H2-Q6
0	0.682735	0.803	0.6	0	gCap	Kras
0	0.68171	0.357	0.111	0	gCap	Fam78b
0	0.68	0.289	0.031	0	gCap	Car14
0	0.678879	0.715	0.588	0	gCap	Lars2
0	0.678738	0.934	0.757	0	gCap	Wasf2
0	0.676371	0.652	0.31	0	gCap	Psd3
0	0.67637	0.55	0.26	0	gCap	Frmd6
0	0.67507	0.857	0.526	0	gCap	Arhgef3
0	0.673902	0.41	0.141	0	gCap	Slc16a9
0	0.673288	0.437	0.151	0	gCap	Ahr
0	0.671616	0.5	0.192	0	gCap	Plekhg1
0	0.670549	0.538	0.288	0	gCap	Trim35
0	0.670164	0.52	0.224	0	gCap	Ston1
0	0.668744	0.765	0.422	0	gCap	Cebpd
0	0.668659	0.501	0.215	0	gCap	Tjp2
0	0.668053	0.52	0.152	0	gCap	Sema7a
0	0.666763	0.82	0.214	0	gCap	Cyp4b1
0	0.665748	0.841	0.434	0	gCap	Gstm1
0	0.664348	0.552	0.251	0	gCap	Pea15a
0	0.664064	0.442	0.157	0	gCap	Git1
0	0.662892	0.85	0.666	0	gCap	Tubb5
0	0.662719	0.565	0.308	0	gCap	Dram2
0	0.662617	0.637	0.3	0	gCap	St3gal6
0	0.661651	0.296	0.07	0	gCap	Spry4
0	0.661287	0.479	0.232	0	gCap	1110038F14Rik
0	0.660524	0.626	0.283	0	gCap	Cd151
0	0.659865	0.407	0.118	0	gCap	Cish
0	0.659167	0.499	0.217	0	gCap	Mical2
0	0.658728	0.367	0.075	0	gCap	Dok4
0	0.657662	0.393	0.193	0	gCap	Gm4258
0	0.657308	0.446	0.166	0	gCap	Dab2ip
0	0.656684	0.627	0.354	0	gCap	Grap
0	0.655619	0.712	0.52	0	gCap	Btbd7
0	0.652273	0.826	0.483	0	gCap	Ptpn12
0	0.650913	0.355	0.17	0	gCap	Gbp7
0	0.649241	0.761	0.596	0	gCap	Dnajc8
0	0.648261	0.595	0.342	0	gCap	Arl2bp
0	0.647146	0.428	0.216	0	gCap	Dusp6
0	0.646048	0.321	0.048	0	gCap	Grtp1
0	0.645797	0.92	0.691	0	gCap	Aplp2
0	0.644909	0.897	0.668	0	gCap	Laptm4a
0	0.644779	0.553	0.314	0	gCap	Plekho1
0	0.644486	0.405	0.141	0	gCap	Tspan8
0	0.641441	0.447	0.195	0	gCap	Kdsr
0	0.641245	0.85	0.677	0	gCap	Tpm4
0	0.640749	0.587	0.284	0	gCap	Vat1
0	0.636424	0.636	0.439	0	gCap	Rassf1
0	0.635918	0.607	0.397	0	gCap	Ankrd13a
0	0.635201	0.624	0.221	0	gCap	Igfbp4
0	0.633438	1	0.997	0	gCap	mt-Atp6
0	0.632956	0.451	0.215	0	gCap	Creb3l2
0	0.631924	0.557	0.295	0	gCap	Klc1
0	0.631568	0.398	0.139	0	gCap	Snx21
0	0.63143	0.515	0.286	0	gCap	Slc23a2
0	0.631175	0.305	0.08	0	gCap	Nxpe4
0	0.62886	0.427	0.168	0	gCap	Mark4
0	0.628815	0.303	0.043	0	gCap	Celsr2
0	0.627839	0.355	0.089	0	gCap	Card10
0	0.627263	0.996	0.942	0	gCap	H2-K1
0	0.627069	0.311	0.101	0	gCap	2610307P16Rik
0	0.626824	0.335	0.071	0	gCap	Fkbp14
0	0.62581	0.365	0.083	0	gCap	Jam2
0	0.625742	0.471	0.254	0	gCap	Stk3
0	0.624689	0.596	0.384	0	gCap	Srgap2
0	0.623063	0.355	0.1	0	gCap	Lxn
0	0.62289	0.391	0.141	0	gCap	Adgrl1
0	0.620925	0.267	0.077	0	gCap	Ccser1
0	0.618295	0.328	0.083	0	gCap	Gfod2
0	0.617779	0.409	0.126	0	gCap	Trim16
0	0.615512	0.394	0.183	0	gCap	Zhx3
0	0.615081	0.47	0.181	0	gCap	Tgfb1i1
0	0.61252	0.426	0.176	0	gCap	Cuedc1
0	0.61238	0.677	0.421	0	gCap	Mprip
0	0.611814	0.375	0.125	0	gCap	2510009E07Rik
0	0.61065	0.354	0.099	0	gCap	Cyp2d22
0	0.610472	0.397	0.155	0	gCap	Mill2
0	0.609975	0.552	0.287	0	gCap	Phactr2
0	0.609853	0.362	0.139	0	gCap	Rgs3
0	0.60925	0.942	0.687	0	gCap	Lamp1
0	0.608727	0.746	0.608	0	gCap	Pomp
0	0.608459	0.527	0.328	0	gCap	Camta1
0	0.607863	0.231	0.047	0	gCap	Apold1
0	0.607813	0.63	0.388	0	gCap	Pttg1ip
0	0.60761	0.512	0.29	0	gCap	4930402H24Rik
0	0.606565	0.614	0.395	0	gCap	Grk5
0	0.606428	0.363	0.117	0	gCap	Edc3
0	0.605317	0.542	0.31	0	gCap	Stx12
0	0.604456	0.54	0.225	0	gCap	Tmtc1
0	0.603449	0.833	0.623	0	gCap	Zmiz1
0	0.602031	0.531	0.231	0	gCap	Trib2
0	0.60143	0.987	0.877	0	gCap	Macf1
0	0.601144	0.335	0.079	0	gCap	Mapk12
0	0.600656	0.408	0.143	0	gCap	Stxbp1
0	0.600542	1	1	0	gCap	Gm42418
0	0.600335	0.905	0.577	0	gCap	Selenop
0	0.600043	0.487	0.277	0	gCap	Alas1
0	0.598164	0.314	0.056	0	gCap	Wscd1
0	0.597656	0.367	0.127	0	gCap	C2cd2
0	0.596471	0.366	0.142	0	gCap	Schip1
0	0.596164	0.469	0.236	0	gCap	Cers4
0	0.59601	0.352	0.125	0	gCap	Ddah1
0	0.59596	0.48	0.227	0	gCap	Crybg3
0	0.593347	0.818	0.597	0	gCap	Ablim1
0	0.591935	0.361	0.114	0	gCap	Dusp8
0	0.591146	0.3	0.045	0	gCap	Upp1
0	0.589876	0.419	0.139	0	gCap	Edil3
0	0.589476	0.894	0.765	0	gCap	Csnk1a1
0	0.589377	0.436	0.214	0	gCap	Zfp704
0	0.588056	0.269	0.063	0	gCap	Scn3b
0	0.587148	0.337	0.094	0	gCap	Nrarp
0	0.58693	0.53	0.322	0	gCap	Naa20
0	0.586708	0.248	0.052	0	gCap	Nipal2
0	0.586544	0.628	0.39	0	gCap	Ldlrad4
0	0.584654	0.471	0.21	0	gCap	Ampd3
0	0.584325	0.595	0.33	0	gCap	Agpat4
0	0.583644	0.9	0.754	0	gCap	Rac1
0	0.582879	0.526	0.285	0	gCap	Ttyh3
0	0.581798	0.426	0.188	0	gCap	Map3k11
0	0.581066	0.404	0.164	0	gCap	Grb10
0	0.579914	0.448	0.237	0	gCap	Rbms2
0	0.579289	0.527	0.306	0	gCap	Ttc7b
0	0.578753	0.555	0.375	0	gCap	Sars
0	0.577114	0.804	0.696	0	gCap	Anp32a
0	0.571077	0.307	0.06	0	gCap	Tal1
0	0.569527	0.785	0.593	0	gCap	Smarca2
0	0.569052	0.533	0.294	0	gCap	Cltb
0	0.568194	0.719	0.555	0	gCap	Dync1i2
0	0.568105	0.241	0.026	0	gCap	Scube1
0	0.567939	0.861	0.695	0	gCap	Pde4b
0	0.567778	0.251	0.06	0	gCap	Rassf9
0	0.567062	0.634	0.186	0	gCap	Tbx3
0	0.56705	0.638	0.357	0	gCap	Cnn3
0	0.56705	0.9	0.791	0	gCap	Dynll1
0	0.566636	0.667	0.513	0	gCap	Eif4g1
0	0.566633	0.406	0.153	0	gCap	Cdc42ep2
0	0.566244	0.131	0.047	0	gCap	Peg3
0	0.565205	0.618	0.404	0	gCap	Cyb5r3
0	0.56518	0.489	0.25	0	gCap	Thra
0	0.564906	0.374	0.157	0	gCap	Plcg1
0	0.564597	0.369	0.116	0	gCap	Pak4
0	0.564355	0.379	0.164	0	gCap	Nod1
0	0.562205	0.879	0.367	0	gCap	Nrp1
0	0.562138	0.514	0.296	0	gCap	Sh2b3
0	0.561592	0.632	0.413	0	gCap	Lrrc58
0	0.560592	0.381	0.143	0	gCap	St3gal2
0	0.559977	0.786	0.567	0	gCap	Itpkb
0	0.559647	0.876	0.66	0	gCap	Rock2
0	0.558971	0.329	0.139	0	gCap	Prkcg
0	0.558508	0.293	0.092	0	gCap	P2rx7
0	0.5576	0.339	0.087	0	gCap	Cmtm8
0	0.55649	0.391	0.189	0	gCap	Wars
0	0.556426	0.492	0.267	0	gCap	Kctd10
0	0.556392	1	0.962	0	gCap	mt-Nd2
0	0.555936	0.559	0.302	0	gCap	Dip2c
0	0.554915	0.348	0.124	0	gCap	Rps6ka2
0	0.55409	0.678	0.556	0	gCap	Cdk8
0	0.553556	0.623	0.377	0	gCap	Nfic
0	0.553133	0.268	0.05	0	gCap	Clec9a
0	0.552683	0.516	0.314	0	gCap	Oaz2
0	0.552571	0.401	0.131	0	gCap	Stab1
0	0.551925	0.367	0.12	0	gCap	Tbkbp1
0	0.551572	0.287	0.049	0	gCap	Nos3
0	0.549905	0.421	0.191	0	gCap	Plscr1
0	0.549289	0.339	0.121	0	gCap	Abcg2
0	0.548938	0.378	0.195	0	gCap	Mospd2
0	0.547996	0.528	0.255	0	gCap	F11r
0	0.546766	0.537	0.284	0	gCap	Lima1
0	0.546694	0.299	0.095	0	gCap	Raver2
0	0.545911	0.335	0.122	0	gCap	Als2cl
0	0.545737	1	0.986	0	gCap	mt-Cytb
0	0.545534	0.362	0.135	0	gCap	Avpi1
0	0.545351	0.45	0.221	0	gCap	Tnfaip1
0	0.545068	0.547	0.402	0	gCap	Chd9
0	0.544518	0.981	0.858	0	gCap	Nfkbia
0	0.540938	0.434	0.213	0	gCap	Dync1li2
0	0.540769	0.304	0.084	0	gCap	Jag1
0	0.540437	0.462	0.249	0	gCap	Myo18a
0	0.540392	0.67	0.499	0	gCap	Sptlc2
0	0.539734	0.562	0.375	0	gCap	Acadl
0	0.538377	0.415	0.171	0	gCap	Ift43
0	0.537532	0.34	0.122	0	gCap	Pelo
0	0.536367	0.684	0.557	0	gCap	AY036118
0	0.536346	0.56	0.371	0	gCap	Dlgap4
0	0.536177	0.524	0.154	0	gCap	Piezo2
0	0.535833	0.324	0.128	0	gCap	Lncppara
0	0.534816	0.523	0.306	0	gCap	Btg3
0	0.5347	0.718	0.383	0	gCap	Ets2
0	0.533992	0.668	0.497	0	gCap	Aopep
0	0.532836	0.299	0.094	0	gCap	Reep1
0	0.532789	0.382	0.157	0	gCap	Peg13
0	0.532215	0.634	0.432	0	gCap	Hipk2
0	0.531278	0.34	0.114	0	gCap	Hotairm1
0	0.531232	0.474	0.226	0	gCap	St6galnac3
0	0.529125	0.616	0.45	0	gCap	Hook3
0	0.52798	0.655	0.248	0	gCap	Gng11
0	0.527893	0.998	0.946	0	gCap	Serinc3
0	0.527789	0.664	0.463	0	gCap	Clip1
0	0.526878	0.44	0.229	0	gCap	Xpnpep1
0	0.526302	0.283	0.095	0	gCap	Atp8b1
0	0.525375	0.412	0.184	0	gCap	Antxr1
0	0.524875	0.736	0.59	0	gCap	Itpr2
0	0.524734	0.48	0.238	0	gCap	Gna11
0	0.522883	0.499	0.327	0	gCap	Il4ra
0	0.522553	0.556	0.375	0	gCap	Nck1
0	0.519866	0.497	0.308	0	gCap	Trim8
0	0.519233	0.843	0.616	0	gCap	Utrn
0	0.518039	0.475	0.268	0	gCap	Vamp3
0	0.517527	0.293	0.061	0	gCap	Cdr2l
0	0.51734	0.488	0.302	0	gCap	Lrp6
0	0.514237	0.341	0.119	0	gCap	Syde1
0	0.512792	0.263	0.065	0	gCap	Rnf144b
0	0.512653	0.156	0.028	0	gCap	Cyp26b1
0	0.512422	0.349	0.129	0	gCap	Inafm2
0	0.512084	0.546	0.378	0	gCap	Cenpb
0	0.512043	0.337	0.146	0	gCap	Trim2
0	0.511754	0.267	0.057	0	gCap	Bcl6b
0	0.511331	0.362	0.141	0	gCap	Slc30a1
0	0.510488	0.377	0.167	0	gCap	Rusc2
0	0.509855	0.213	0.049	0	gCap	Epha4
0	0.509222	0.938	0.851	0	gCap	Clic1
0	0.509045	0.34	0.111	0	gCap	Ifitm10
0	0.508996	0.543	0.215	0	gCap	Tmem204
0	0.506712	0.249	0.051	0	gCap	Ptpru
0	0.504778	0.519	0.313	0	gCap	Mast4
0	0.50452	0.221	0.047	0	gCap	Fam71f2
0	0.504421	0.342	0.176	0	gCap	Afg1l
0	0.504338	0.982	0.952	0	gCap	Son
0	0.504115	1	0.982	0	gCap	H2-D1
0	0.504047	0.551	0.412	0	gCap	Tasor
0	0.501454	0.389	0.171	0	gCap	Pald1
0	0.500425	0.605	0.428	0	gCap	Tmco1
0	0.499625	0.235	0.023	0	gCap	Dnah2os
0	0.499109	0.481	0.288	0	gCap	Sav1
0	0.498646	0.573	0.43	0	gCap	Rb1
0	0.498464	0.526	0.347	0	gCap	Cebpg
0	0.497681	0.264	0.061	0	gCap	Plekha8
0	0.49738	1	0.998	0	gCap	Malat1
0	0.496835	0.309	0.132	0	gCap	Hs3st1
0	0.496693	0.405	0.166	0	gCap	Npdc1
0	0.496094	0.372	0.185	0	gCap	Fnip2
0	0.49589	0.29	0.11	0	gCap	Nos1ap
0	0.494542	0.405	0.216	0	gCap	Acadsb
0	0.494334	0.326	0.091	0	gCap	Gm9917
0	0.493046	0.577	0.382	0	gCap	Il6st
0	0.491307	0.258	0.087	0	gCap	Spaca6
0	0.490597	0.408	0.167	0	gCap	Ccnd1
0	0.490432	0.679	0.518	0	gCap	Nisch
0	0.489234	0.257	0.063	0	gCap	Fam124a
0	0.487373	0.463	0.158	0	gCap	Tspan12
0	0.487143	0.203	0.02	0	gCap	Disp2
0	0.486855	0.461	0.206	0	gCap	Tmem140
0	0.485576	0.401	0.234	0	gCap	Smad1
0	0.48527	0.179	0.028	0	gCap	Dipk2b
0	0.484937	0.539	0.37	0	gCap	Eea1
0	0.484035	0.435	0.233	0	gCap	Smim10l1
0	0.483807	0.411	0.226	0	gCap	Mfhas1
0	0.483439	0.597	0.432	0	gCap	B230219D22Rik
0	0.483236	0.394	0.142	0	gCap	Pard6g
0	0.482867	0.759	0.652	0	gCap	Nsd1
0	0.481215	0.351	0.145	0	gCap	Btbd3
0	0.480913	0.35	0.102	0	gCap	Pllp
0	0.480813	0.613	0.49	0	gCap	Ddx17
0	0.480785	0.524	0.382	0	gCap	Tet3
0	0.480482	0.488	0.33	0	gCap	Prkacb
0	0.478802	0.34	0.14	0	gCap	Cmtm3
0	0.478206	0.287	0.075	0	gCap	C130074G19Rik
0	0.477017	0.429	0.238	0	gCap	Atp13a2
0	0.476924	0.395	0.2	0	gCap	Baiap2
0	0.476711	0.265	0.112	0	gCap	Osmr
0	0.476687	0.339	0.144	0	gCap	Soga1
0	0.474953	0.32	0.118	0	gCap	Dele1
0	0.47474	0.772	0.621	0	gCap	Acap2
0	0.473826	0.35	0.106	0	gCap	Gm13889
0	0.473208	0.317	0.093	0	gCap	Ackr2
0	0.470398	0.99	0.913	0	gCap	Txnip
0	0.469472	0.245	0.043	0	gCap	Kif26a
0	0.468902	0.244	0.052	0	gCap	Plekhg5
0	0.468847	0.876	0.797	0	gCap	Eif4g2
0	0.467884	0.317	0.137	0	gCap	Xaf1
0	0.467865	0.284	0.079	0	gCap	Ppp2r5b
0	0.466636	0.34	0.142	0	gCap	Magi1
0	0.465083	0.322	0.134	0	gCap	Phldb1
0	0.464326	0.431	0.273	0	gCap	Wdr37
0	0.464124	0.26	0.093	0	gCap	Dysf
0	0.463351	0.35	0.147	0	gCap	Trip10
0	0.462769	0.414	0.227	0	gCap	Gna12
0	0.46151	0.619	0.463	0	gCap	Sypl
0	0.46118	0.607	0.39	0	gCap	Rhob
0	0.460724	0.464	0.287	0	gCap	Leprot
0	0.460077	0.94	0.81	0	gCap	Atp2b1
0	0.459842	0.313	0.127	0	gCap	Nhsl2
0	0.45881	0.819	0.71	0	gCap	Abi1
0	0.458466	0.528	0.381	0	gCap	Psmb10
0	0.458422	0.384	0.249	0	gCap	Rnf213
0	0.457836	0.406	0.198	0	gCap	Bicd2
0	0.456012	0.337	0.142	0	gCap	Car2
0	0.455913	0.155	0.026	0	gCap	Gm4951
0	0.455842	0.5	0.372	0	gCap	Ttc3
0	0.455371	0.531	0.401	0	gCap	Exoc6b
0	0.454925	0.401	0.252	0	gCap	Airn
0	0.454578	0.386	0.181	0	gCap	Plcl1
0	0.454293	0.23	0.047	0	gCap	Kazn
0	0.453544	0.82	0.707	0	gCap	Arhgdia
0	0.453384	0.676	0.5	0	gCap	Ski
0	0.453097	0.572	0.442	0	gCap	Ppm1a
0	0.451515	0.427	0.288	0	gCap	Tom1l2
0	0.451274	0.333	0.172	0	gCap	Tbc1d12
0	0.45014	0.245	0.043	0	gCap	Bik
0	0.449716	0.27	0.104	0	gCap	Fam135a
0	0.4493	0.405	0.255	0	gCap	P2rx4
0	0.447994	0.608	0.408	0	gCap	Inpp5a
0	0.447244	0.298	0.121	0	gCap	Gm46367
0	0.446831	0.776	0.712	0	gCap	Snrpb
0	0.446084	0.536	0.385	0	gCap	Oip5os1
0	0.445817	0.208	0.047	0	gCap	Cd300lg
0	0.445662	0.715	0.585	0	gCap	Lrch1
0	0.445586	0.345	0.148	0	gCap	Rcn1
0	0.445334	0.762	0.63	0	gCap	Fcho2
0	0.443102	0.307	0.132	0	gCap	Rassf8
0	0.44241	0.505	0.303	0	gCap	Dpp4
0	0.442358	0.973	0.921	0	gCap	Hmgb1
0	0.442173	0.328	0.156	0	gCap	Qser1
0	0.442064	1	0.977	0	gCap	mt-Nd4
0	0.441854	0.438	0.297	0	gCap	Tbc1d22a
0	0.441469	0.377	0.198	0	gCap	Helz2
0	0.440607	0.43	0.251	0	gCap	Slc44a1
0	0.440448	0.277	0.093	0	gCap	P4ha2
0	0.439485	0.231	0.068	0	gCap	Lurap1l
0	0.439458	0.144	0.024	0	gCap	9630014M24Rik
0	0.439199	0.755	0.673	0	gCap	Eif2s2
0	0.438898	0.256	0.067	0	gCap	St6galnac2
0	0.438797	0.503	0.32	0	gCap	Magi3
0	0.438721	0.336	0.151	0	gCap	Ctbp2
0	0.438413	0.478	0.344	0	gCap	mt-Atp8
0	0.437818	0.845	0.797	0	gCap	Arf1
0	0.43745	0.239	0.109	0	gCap	Irgm2
0	0.437171	0.4	0.196	0	gCap	Bag5
0	0.436985	0.67	0.581	0	gCap	Tapbp
0	0.436938	0.499	0.339	0	gCap	Tmpo
0	0.435767	0.493	0.367	0	gCap	Ubr4
0	0.435711	0.592	0.455	0	gCap	Gatad2a
0	0.435069	0.297	0.124	0	gCap	Tmem63a
0	0.43431	0.303	0.124	0	gCap	Plxnd1
0	0.43427	0.369	0.187	0	gCap	Ick
0	0.433446	0.355	0.185	0	gCap	Zfp664
0	0.433237	0.374	0.217	0	gCap	Erc1
0	0.432811	0.234	0.051	0	gCap	Fam107a
0	0.432436	0.734	0.615	0	gCap	Uqcrb
0	0.432072	0.168	0.03	0	gCap	Me3
0	0.431609	0.243	0.076	0	gCap	Ciart
0	0.43117	0.421	0.201	0	gCap	Tspan4
0	0.431017	0.26	0.078	0	gCap	Sh3bp4
0	0.430033	0.34	0.149	0	gCap	Tspan2
0	0.429945	0.467	0.32	0	gCap	Prxl2c
0	0.429857	0.267	0.083	0	gCap	Agrn
0	0.428858	0.506	0.374	0	gCap	Klf10
0	0.428411	0.396	0.27	0	gCap	Trim24
0	0.427822	0.314	0.136	0	gCap	Stom
0	0.427614	0.466	0.276	0	gCap	Lmo2
0	0.427604	0.544	0.313	0	gCap	Nfix
0	0.427054	0.814	0.71	0	gCap	Selenof
0	0.425336	0.179	0.037	0	gCap	Nhsl1
0	0.424838	0.311	0.145	0	gCap	H1f0
0	0.421385	0.174	0.027	0	gCap	Kank4
0	0.420893	0.269	0.107	0	gCap	Cars
0	0.420554	0.253	0.086	0	gCap	Gtf2ird1
0	0.419209	0.381	0.234	0	gCap	Mdfic
0	0.419079	0.488	0.34	0	gCap	Mob2
0	0.419008	0.212	0.041	0	gCap	Fzd6
0	0.418808	0.578	0.468	0	gCap	Kat6a
0	0.417406	0.745	0.647	0	gCap	Phf20l1
0	0.417401	0.997	0.955	0	gCap	Hsp90ab1
0	0.416642	0.278	0.098	0	gCap	Epha2
0	0.415404	0.236	0.068	0	gCap	Spats2
0	0.415094	0.227	0.057	0	gCap	Sema4c
0	0.414519	0.583	0.494	0	gCap	Prpf4b
0	0.414341	0.437	0.266	0	gCap	Gimap5
0	0.411703	0.347	0.217	0	gCap	Btrc
0	0.411488	0.525	0.383	0	gCap	Elk4
0	0.411424	0.248	0.108	0	gCap	Pik3r3
0	0.410326	0.366	0.175	0	gCap	Sdc3
0	0.410246	0.517	0.37	0	gCap	Sipa1
0	0.410174	0.4	0.234	0	gCap	Sipa1l2
0	0.409398	0.346	0.185	0	gCap	Sun1
0	0.409276	0.392	0.229	0	gCap	Gimap8
0	0.408906	0.262	0.084	0	gCap	Bcar1
0	0.408697	0.345	0.174	0	gCap	Dusp7
0	0.408671	0.302	0.156	0	gCap	Fer
0	0.408567	0.998	0.963	0	gCap	B2m
0	0.40783	0.897	0.738	0	gCap	Hsp90b1
0	0.407705	0.552	0.408	0	gCap	Srpr
0	0.406557	0.445	0.297	0	gCap	Irf2bpl
0	0.406169	0.56	0.428	0	gCap	Crk
0	0.406132	0.745	0.674	0	gCap	Snx3
0	0.405497	0.442	0.208	0	gCap	Abi3bp
0	0.404607	0.257	0.109	0	gCap	Gbp2
0	0.404604	0.734	0.594	0	gCap	Tuba1b
0	0.404437	0.419	0.312	0	gCap	Guk1
0	0.404093	0.429	0.282	0	gCap	Nr1d2
0	0.403882	0.284	0.125	0	gCap	Hdgfl3
0	0.403114	0.959	0.876	0	gCap	Msn
0	0.403	0.328	0.154	0	gCap	Ndrg1
0	0.402926	0.463	0.304	0	gCap	Tecpr1
0	0.402224	0.603	0.485	0	gCap	Pura
0	0.40211	0.716	0.59	0	gCap	Tubb4b
0	0.401726	0.465	0.291	0	gCap	Tmem109
0	0.40063	0.276	0.125	0	gCap	Ier5l
0	0.400534	0.62	0.525	0	gCap	Ralbp1
0	0.400314	0.259	0.093	0	gCap	Gdpd1
0	0.399177	0.427	0.294	0	gCap	Inpp5k
0	0.398875	0.233	0.065	0	gCap	Kifc3
0	0.398749	0.262	0.112	0	gCap	Cipc
0	0.39846	0.208	0.079	0	gCap	Slc2a13
0	0.39746	0.855	0.764	0	gCap	Ndufa4
0	0.396996	0.754	0.69	0	gCap	Atrx
0	0.396948	0.737	0.631	0	gCap	Ywhab
0	0.396611	0.256	0.077	0	gCap	Mtss2
0	0.39651	0.397	0.272	0	gCap	Scmh1
0	0.396434	0.362	0.231	0	gCap	Stxbp5
0	0.396359	1	0.996	0	gCap	mt-Co2
0	0.396101	0.364	0.193	0	gCap	Fez2
0	0.394645	0.473	0.334	0	gCap	Nras
0	0.394038	0.302	0.132	0	gCap	Slc35f5
0	0.393815	0.569	0.266	0	gCap	Serpinh1
0	0.393237	0.574	0.447	0	gCap	Vgll4
0	0.393217	0.351	0.219	0	gCap	Acyp2
0	0.392041	0.426	0.31	0	gCap	Hibadh
0	0.391843	0.711	0.509	0	gCap	Fyn
0	0.39178	0.247	0.093	0	gCap	Cdr2
0	0.391675	0.585	0.508	0	gCap	Luc7l3
0	0.391526	0.246	0.083	0	gCap	Tmem88
0	0.390579	0.347	0.2	0	gCap	Mesd
0	0.3902	0.853	0.778	0	gCap	Prrc2c
0	0.388958	0.685	0.592	0	gCap	Taok1
0	0.388791	0.562	0.438	0	gCap	Ifnar2
0	0.388554	0.276	0.146	0	gCap	Lipe
0	0.387407	0.173	0.054	0	gCap	Garnl3
0	0.38739	0.182	0.06	0	gCap	Mpped2
0	0.386822	0.644	0.356	0	gCap	Tgm2
0	0.385207	0.249	0.084	0	gCap	Rilpl1
0	0.384804	0.228	0.075	0	gCap	Atp9a
0	0.384536	0.241	0.1	0	gCap	Parp12
0	0.384455	0.304	0.139	0	gCap	Rnf215
0	0.384339	0.57	0.443	0	gCap	Lats2
0	0.384154	0.34	0.2	0	gCap	Pggt1b
0	0.384121	0.641	0.523	0	gCap	Sppl3
0	0.383896	0.304	0.161	0	gCap	Myef2
0	0.383795	0.558	0.375	0	gCap	Tnfrsf1a
0	0.383697	0.178	0.04	0	gCap	Fat4
0	0.383315	0.345	0.126	0	gCap	Ltbp1
0	0.383252	0.119	0.019	0	gCap	Inhbb
0	0.383123	0.531	0.434	0	gCap	Pcm1
0	0.38139	0.447	0.291	0	gCap	Hras
0	0.381358	0.246	0.107	0	gCap	Ctif
0	0.380658	0.742	0.637	0	gCap	H2-T23
0	0.380618	0.534	0.418	0	gCap	Sod1
0	0.380572	0.525	0.419	0	gCap	Rnf7
0	0.38053	0.312	0.158	0	gCap	Prkab1
0	0.379237	0.845	0.346	0	gCap	Entpd1
0	0.378916	0.292	0.186	0	gCap	Fam193b
0	0.378883	0.308	0.167	0	gCap	Nde1
0	0.3779	0.271	0.14	0	gCap	Hist1h1e
0	0.377692	0.266	0.16	0	gCap	Tmem241
0	0.377447	0.86	0.785	0	gCap	Gnb2
0	0.377313	0.692	0.622	0	gCap	Atf4
0	0.377309	0.425	0.267	0	gCap	Lman1
0	0.377243	0.275	0.13	0	gCap	Shb
0	0.37692	0.344	0.199	0	gCap	Vamp5
0	0.376915	0.409	0.105	0	gCap	Prss23
0	0.375825	0.333	0.185	0	gCap	Mtmr2
0	0.375598	0.79	0.713	0	gCap	Kif5b
0	0.374953	0.202	0.051	0	gCap	Tubb2b
0	0.374785	0.291	0.174	0	gCap	Tdrd3
0	0.374757	0.82	0.311	0	gCap	Sparc
0	0.374554	0.253	0.115	0	gCap	Mtmr10
0	0.374274	0.358	0.2	0	gCap	Fam129b
0	0.374238	0.926	0.874	0	gCap	Srrm2
0	0.374208	0.295	0.158	0	gCap	Tdrd7
0	0.374095	0.588	0.439	0	gCap	St3gal1
0	0.374056	0.247	0.096	0	gCap	Zfpm1
0	0.373914	0.438	0.325	0	gCap	Wbp4
0	0.372916	0.609	0.462	0	gCap	Rsu1
0	0.372894	0.817	0.768	0	gCap	Cox7a2
0	0.372508	0.461	0.347	0	gCap	Pds5b
0	0.372224	0.128	0.031	0	gCap	Depp1
0	0.371733	0.567	0.47	0	gCap	Ndufc2
0	0.370893	0.281	0.146	0	gCap	Rnf217
0	0.37079	0.448	0.328	0	gCap	Anxa7
0	0.370262	0.494	0.383	0	gCap	Myo9a
0	0.370152	0.317	0.188	0	gCap	Trim56
0	0.368916	0.275	0.142	0	gCap	Cnksr3
0	0.368387	0.687	0.41	0	gCap	Ppp1r16b
0	0.36821	0.57	0.422	0	gCap	Dennd5a
0	0.367889	0.192	0.051	0	gCap	9330175M20Rik
0	0.367327	0.541	0.425	0	gCap	Cd2ap
0	0.366863	0.273	0.133	0	gCap	Erf
0	0.366694	0.371	0.205	0	gCap	Ppfibp1
0	0.366547	0.683	0.619	0	gCap	Hnrnph1
0	0.366	0.307	0.161	0	gCap	Ro60
0	0.365706	0.506	0.367	0	gCap	Pdlim1
0	0.364966	0.327	0.198	0	gCap	Gle1
0	0.364906	0.341	0.173	0	gCap	Zfyve9
0	0.36462	0.452	0.31	0	gCap	Pdcl3
0	0.364219	0.336	0.198	0	gCap	Gab1
0	0.364109	0.595	0.238	0	gCap	Bcam
0	0.363945	0.41	0.3	0	gCap	Tmf1
0	0.363806	0.26	0.108	0	gCap	Riox1
0	0.36349	0.377	0.22	0	gCap	Bag3
0	0.363427	0.449	0.191	0	gCap	Stxbp6
0	0.363358	0.161	0.02	0	gCap	Mpp3
0	0.363151	0.727	0.666	0	gCap	Tnrc6c
0	0.362965	0.35	0.223	0	gCap	Bcl9l
0	0.362903	0.158	0.051	0	gCap	2700054A10Rik
0	0.362788	0.241	0.083	0	gCap	Pwwp2b
0	0.362765	0.499	0.386	0	gCap	Shoc2
0	0.362742	0.479	0.37	0	gCap	Arhgef2
0	0.362307	0.996	0.967	0	gCap	Myl6
0	0.361554	0.831	0.756	0	gCap	Ywhae
0	0.361111	0.356	0.215	0	gCap	Triobp
0	0.361	0.264	0.112	0	gCap	Yap1
0	0.360598	0.22	0.065	0	gCap	Scarf1
0	0.360556	0.662	0.592	0	gCap	Mkln1
0	0.360125	0.468	0.34	0	gCap	Snx13
0	0.359823	0.152	0.028	0	gCap	Gm13387
0	0.359343	0.395	0.268	0	gCap	Bag6
0	0.358939	0.888	0.711	0	gCap	Tagln2
0	0.358782	0.825	0.596	0	gCap	Atp8a1
0	0.357927	0.777	0.649	0	gCap	Akr1a1
0	0.357888	0.199	0.071	0	gCap	Tbc1d30
0	0.357847	0.339	0.172	0	gCap	Cd38
0	0.357193	0.417	0.304	0	gCap	Gars
0	0.355766	0.336	0.194	0	gCap	Tmem65
0	0.355586	0.727	0.666	0	gCap	Srsf11
0	0.355194	0.247	0.096	0	gCap	Slc35e4
0	0.35514	0.688	0.227	0	gCap	Kitl
0	0.354841	0.477	0.284	0	gCap	Elovl1
0	0.354511	0.283	0.122	0	gCap	Zfp697
0	0.354474	0.789	0.684	0	gCap	Tmod3
0	0.353812	0.568	0.482	0	gCap	Metap2
0	0.353663	0.203	0.051	0	gCap	Nynrin
0	0.353359	0.405	0.246	0	gCap	Pdlim7
0	0.353316	0.554	0.464	0	gCap	Ddx50
0	0.352533	0.329	0.207	0	gCap	Gcn1
0	0.351444	0.219	0.085	0	gCap	Shroom4
0	0.350227	0.621	0.526	0	gCap	Nucks1
0	0.349367	0.479	0.362	0	gCap	Kdelr2
0	0.349156	0.26	0.119	0	gCap	Plxna1
0	0.349001	0.277	0.138	0	gCap	Rab6b
0	0.348603	0.239	0.124	0	gCap	Cntln
0	0.348522	0.556	0.463	0	gCap	Zcrb1
0	0.347742	0.595	0.505	0	gCap	Pkn2
0	0.347129	0.445	0.321	0	gCap	Nfe2l1
0	0.34626	0.28	0.121	0	gCap	Homer3
0	0.345907	0.244	0.101	0	gCap	Il3ra
0	0.345614	0.511	0.395	0	gCap	Gltp
0	0.345446	0.391	0.279	0	gCap	Ppp4r1
0	0.345419	0.379	0.257	0	gCap	Rnpepl1
0	0.343948	0.855	0.553	0	gCap	Ahnak
0	0.343802	0.702	0.61	0	gCap	Uqcr11
0	0.343712	0.363	0.236	0	gCap	Abhd16a
0	0.343447	0.411	0.275	0	gCap	Ssbp4
0	0.343273	0.71	0.655	0	gCap	Purb
0	0.343199	0.141	0.014	0	gCap	Grp
0	0.343089	0.357	0.239	0	gCap	0610010K14Rik
0	0.342918	0.381	0.215	0	gCap	Atp11a
0	0.342836	0.369	0.256	0	gCap	Phactr4
0	0.342527	0.176	0.044	0	gCap	Capn5
0	0.341099	0.261	0.122	0	gCap	Lmf2
0	0.340646	0.509	0.39	0	gCap	Fbxw2
0	0.3405	0.301	0.19	0	gCap	Casd1
0	0.34032	0.783	0.742	0	gCap	Atp5j
0	0.340197	0.267	0.135	0	gCap	Arhgap27
0	0.339854	0.933	0.833	0	gCap	Mbnl2
0	0.339756	0.354	0.232	0	gCap	Stk25
0	0.339254	0.164	0.048	0	gCap	Vsig2
0	0.338912	0.971	0.948	0	gCap	Rhoa
0	0.33886	0.749	0.658	0	gCap	Nr3c1
0	0.33857	0.342	0.22	0	gCap	Jade2
0	0.337648	0.234	0.096	0	gCap	Slc16a2
0	0.337145	0.5	0.39	0	gCap	Ctdsp2
0	0.336472	0.582	0.454	0	gCap	Znrf1
0	0.336422	0.396	0.283	0	gCap	Tsg101
0	0.336361	0.539	0.443	0	gCap	Atxn7l3b
0	0.335962	0.722	0.66	0	gCap	Psma7
0	0.335875	0.15	0.04	0	gCap	Hdx
0	0.334449	0.286	0.177	0	gCap	BC005561
0	0.334039	0.144	0.019	0	gCap	9630028H03Rik
0	0.333076	0.219	0.059	0	gCap	Pcp4l1
0	0.332427	0.541	0.407	0	gCap	Myo1c
0	0.332397	0.315	0.098	0	gCap	Pcsk5
0	0.33198	0.331	0.205	0	gCap	Traf7
0	0.331557	0.267	0.121	0	gCap	Cttn
0	0.331526	0.628	0.444	0	gCap	Arap2
0	0.330926	0.466	0.36	0	gCap	Polr2m
0	0.330836	0.341	0.173	0	gCap	Pkd2
0	0.330282	0.155	0.027	0	gCap	Gdpd5
0	0.329887	0.31	0.193	0	gCap	Rgl2
0	0.329319	0.384	0.198	0	gCap	Nid1
0	0.328674	0.285	0.149	0	gCap	Slc39a6
0	0.327715	0.357	0.233	0	gCap	Wsb2
0	0.327472	0.359	0.247	0	gCap	Hmg20b
0	0.32729	0.183	0.046	0	gCap	Tead2
0	0.327129	0.801	0.711	0	gCap	Calr
0	0.326531	0.169	0.029	0	gCap	B3gnt3
0	0.326127	0.63	0.555	0	gCap	Rab1a
0	0.326088	0.283	0.152	0	gCap	Tbc1d10a
0	0.32576	0.349	0.203	0	gCap	Farp1
0	0.324835	0.311	0.195	0	gCap	Znfx1
0	0.32448	0.618	0.554	0	gCap	Chmp2a
0	0.324292	0.157	0.033	0	gCap	Nkd2
0	0.323268	0.501	0.406	0	gCap	Chmp5
0	0.323125	0.333	0.22	0	gCap	Fam222b
0	0.32312	0.421	0.298	0	gCap	Ifi35
0	0.323101	0.189	0.082	0	gCap	Mettl15
0	0.322459	0.504	0.408	0	gCap	Dctn2
0	0.32212	0.464	0.343	0	gCap	Ndfip2
0	0.321756	0.251	0.111	0	gCap	Tnks1bp1
0	0.32149	0.662	0.562	0	gCap	Zmynd11
0	0.321047	0.306	0.198	0	gCap	Camsap2
0	0.320931	0.32	0.194	0	gCap	Plekha3
0	0.320832	0.173	0.048	0	gCap	Tnfrsf10b
0	0.320746	0.315	0.201	0	gCap	Dapk3
0	0.320277	0.128	0.021	0	gCap	Ntrk2
0	0.318952	0.176	0.06	0	gCap	Spats2l
0	0.318803	0.9	0.813	0	gCap	mt-Nd5
0	0.318518	0.251	0.126	0	gCap	Tcaf1
0	0.31757	0.144	0.023	0	gCap	Plekhh1
0	0.317259	0.252	0.126	0	gCap	Unc119b
0	0.317037	0.197	0.092	0	gCap	Oasl2
0	0.316232	0.69	0.629	0	gCap	Eif4h
0	0.316187	0.35	0.225	0	gCap	Ralb
0	0.315804	0.578	0.463	0	gCap	Kif1b
0	0.315427	0.195	0.073	0	gCap	B430010I23Rik
0	0.315154	0.486	0.379	0	gCap	Nucb1
0	0.314988	0.294	0.181	0	gCap	Mapk9
0	0.314486	0.204	0.075	0	gCap	Dusp23
0	0.314304	0.42	0.249	0	gCap	S100a1
0	0.313825	0.319	0.207	0	gCap	Zscan26
0	0.313127	0.975	0.627	0	gCap	Cd9
0	0.312902	0.214	0.1	0	gCap	4930503L19Rik
0	0.312878	0.594	0.49	0	gCap	Serinc1
0	0.312855	0.239	0.11	0	gCap	Ankrd50
0	0.312831	0.392	0.162	0	gCap	Itga3
0	0.312551	0.338	0.218	0	gCap	Tef
0	0.312478	0.253	0.121	0	gCap	Glis2
0	0.312185	0.164	0.035	0	gCap	Gm15581
0	0.311955	0.206	0.077	0	gCap	Adgra2
0	0.311696	0.286	0.133	0	gCap	Gm30382
0	0.311274	0.917	0.871	0	gCap	Hnrnpa2b1
0	0.310667	0.135	0.016	0	gCap	D830026I12Rik
0	0.31053	0.157	0.032	0	gCap	Pcdh12
0	0.310002	0.154	0.022	0	gCap	Gpr4
0	0.309826	0.162	0.052	0	gCap	Fam13c
0	0.309626	0.759	0.684	0	gCap	Sept7
0	0.309435	0.205	0.088	0	gCap	Zfp532
0	0.30845	0.99	0.967	0	gCap	Calm1
0	0.30709	0.136	0.017	0	gCap	Glb1l2
0	0.306338	0.224	0.105	0	gCap	Ccdc28b
0	0.306298	0.205	0.076	0	gCap	Hoxb5
0	0.30624	0.212	0.082	0	gCap	Zfp319
0	0.305965	0.473	0.348	0	gCap	Sept11
0	0.305769	0.154	0.033	0	gCap	Ada
0	0.305073	0.219	0.072	0	gCap	Lbp
0	0.304368	0.148	0.028	0	gCap	Gm29107
0	0.303045	0.181	0.072	0	gCap	Eva1c
0	0.30274	0.265	0.13	0	gCap	Gnb4
0	0.302555	0.49	0.383	0	gCap	Tmem256
0	0.301701	0.235	0.106	0	gCap	Ankrd46
0	0.301038	0.249	0.13	0	gCap	Slc12a4
0	0.30029	0.227	0.1	0	gCap	Trim37
0	0.29981	0.172	0.055	0	gCap	Bend7
0	0.29937	0.312	0.14	0	gCap	Itga5
0	0.298552	0.22	0.112	0	gCap	Inf2
0	0.296915	0.221	0.099	0	gCap	Sult1a1
0	0.296873	0.673	0.637	0	gCap	Prkar1a
0	0.296846	0.789	0.718	0	gCap	Tmem59
0	0.29607	0.334	0.202	0	gCap	Mfng
0	0.295193	0.289	0.171	0	gCap	Ltbr
0	0.294938	0.195	0.081	0	gCap	Pvr
0	0.293415	0.806	0.733	0	gCap	Stag1
0	0.293085	0.157	0.054	0	gCap	Prkaa2
0	0.292763	0.339	0.226	0	gCap	Ankrd40
0	0.291666	0.19	0.065	0	gCap	Castor1
0	0.291348	0.268	0.153	0	gCap	Chst15
0	0.291241	0.198	0.101	0	gCap	Ophn1
0	0.290693	0.18	0.06	0	gCap	Mras
0	0.29054	0.981	0.838	0	gCap	Ly6e
0	0.290056	0.285	0.167	0	gCap	Nr1d1
0	0.289208	0.197	0.049	0	gCap	Samd5
0	0.288752	0.275	0.167	0	gCap	Kif1c
0	0.288469	0.373	0.211	0	gCap	Ryk
0	0.288142	0.15	0.039	0	gCap	Nxpe2
0	0.287535	0.222	0.118	0	gCap	Mpdz
0	0.287296	0.732	0.678	0	gCap	Ywhaq
0	0.286939	0.924	0.858	0	gCap	Myh9
0	0.286869	0.166	0.063	0	gCap	Wdr59
0	0.285992	0.265	0.146	0	gCap	Nbdy
0	0.285126	0.272	0.142	0	gCap	Gulp1
0	0.283661	0.148	0.037	0	gCap	Pkn3
0	0.282824	0.206	0.081	0	gCap	Dmwd
0	0.282424	0.298	0.182	0	gCap	Mrpl53
0	0.282249	0.243	0.129	0	gCap	Zc3h7b
0	0.28188	0.962	0.938	0	gCap	Chchd2
0	0.279475	0.24	0.099	0	gCap	Hfe
0	0.277114	0.289	0.17	0	gCap	Sh3tc1
0	0.276516	0.29	0.176	0	gCap	Pik3cb
0	0.275805	0.157	0.036	0	gCap	Neurl1b
0	0.275389	0.154	0.061	0	gCap	Disc1
0	0.275201	0.296	0.17	0	gCap	Sgce
0	0.274664	0.178	0.06	0	gCap	Stap2
0	0.274635	0.283	0.13	0	gCap	Gnao1
0	0.274011	0.185	0.091	0	gCap	Ttc39c
0	0.272572	0.693	0.524	0	gCap	Skap2
0	0.272205	0.102	0.013	0	gCap	Clec12b
0	0.272141	0.869	0.852	0	gCap	Hnrnpk
0	0.271359	0.581	0.429	0	gCap	Vcl
0	0.270444	0.212	0.108	0	gCap	Usp46
0	0.270335	0.286	0.173	0	gCap	Dbp
0	0.270248	0.223	0.113	0	gCap	Zdhhc1
0	0.268999	0.269	0.156	0	gCap	Scoc
0	0.268728	0.155	0.055	0	gCap	Trpm4
0	0.268254	0.162	0.059	0	gCap	Gm15614
0	0.268042	0.443	0.29	0	gCap	Rab31
0	0.267634	0.108	0.014	0	gCap	Gm20631
0	0.267585	0.186	0.088	0	gCap	Adamtsl4
0	0.267444	0.189	0.084	0	gCap	Hoxb4
0	0.266851	0.141	0.044	0	gCap	Ppp1r18os
0	0.266781	0.129	0.021	0	gCap	Exoc3l
0	0.266625	0.858	0.748	0	gCap	Spag9
0	0.266439	0.265	0.153	0	gCap	Zcchc24
0	0.26556	0.29	0.15	0	gCap	Cx3cr1
0	0.264501	0.237	0.128	0	gCap	Tbcc
0	0.263821	0.132	0.03	0	gCap	Prodh
0	0.261358	0.219	0.111	0	gCap	Tfpi
0	0.261323	0.212	0.103	0	gCap	Prmt2
0	0.260846	0.206	0.106	0	gCap	Casp7
0	0.260813	0.133	0.041	0	gCap	Arhgap20
0	0.260362	0.125	0.029	0	gCap	Gm48089
0	0.260138	0.557	0.388	0	gCap	Tsc22d1
0	0.259915	0.198	0.099	0	gCap	Tsc2
0	0.258374	0.154	0.048	0	gCap	Timeless
0	0.257191	0.182	0.083	0	gCap	Limk1
0	0.255739	0.92	0.895	0	gCap	Morf4l1
0	0.254775	0.241	0.122	0	gCap	Tspan17
0	0.254774	0.327	0.192	0	gCap	Nipal3
0	0.254677	0.476	0.192	0	gCap	Cd34
0	0.254595	0.15	0.056	0	gCap	Phf11d
0	0.252914	0.257	0.143	0	gCap	Lzts2
0	0.252472	0.174	0.082	0	gCap	Tpra1
0	0.252248	0.236	0.134	0	gCap	Nr2f6
0	0.250833	0.124	0.035	0	gCap	Gm49767
0	0.250122	0.947	0.898	0	gCap	Arpc3
2.47963e-307	0.258687	0.211	0.111	5.94664e-303	gCap	Plod2
4.83247e-307	0.36019	0.533	0.435	1.15892e-302	gCap	Lrch3
4.02434e-306	0.310801	0.318	0.21	9.65116e-302	gCap	Scaf1
1.04979e-305	0.293878	0.531	0.428	2.5176e-301	gCap	Tmbim4
2.63268e-305	0.318728	0.529	0.443	6.31368e-301	gCap	Higd1a
5.86497e-305	0.319181	0.471	0.358	1.40654e-300	gCap	Dgkz
3.94536e-304	0.265491	0.495	0.375	9.46176e-300	gCap	Pxn
1.64193e-303	0.311395	0.585	0.505	3.93767e-299	gCap	Rab5c
3.24857e-303	0.299035	0.328	0.223	7.79073e-299	gCap	Mrps18a
3.79254e-303	0.307533	0.415	0.307	9.09527e-299	gCap	Fam76a
4.60886e-303	0.436981	0.588	0.499	1.1053e-298	gCap	Irf1
1.05615e-302	0.343354	0.421	0.319	2.53286e-298	gCap	Cnot6
1.70469e-301	0.328331	0.54	0.452	4.08818e-297	gCap	Anapc5
5.47327e-301	0.261656	0.428	0.303	1.3126e-296	gCap	St3gal4
3.76039e-297	0.396176	0.704	0.612	9.01816e-293	gCap	Gm47283
2.58413e-295	0.309641	0.539	0.455	6.19727e-291	gCap	Trappc6b
2.04595e-294	0.273638	0.253	0.152	4.90659e-290	gCap	Aars
4.95398e-294	0.310284	0.419	0.314	1.18806e-289	gCap	Pak1ip1
1.41578e-293	0.267493	0.306	0.201	3.39533e-289	gCap	Tax1bp3
1.52445e-292	0.318837	0.341	0.231	3.65593e-288	gCap	Pde8a
1.24115e-291	0.360185	0.595	0.525	2.97652e-287	gCap	Zfr
7.39399e-290	0.318754	0.329	0.215	1.77323e-285	gCap	Nxn
7.66372e-290	0.262043	0.318	0.211	1.83791e-285	gCap	Yif1b
1.10188e-287	0.268026	0.136	0.058	2.64254e-283	gCap	Jazf1
5.48088e-287	0.332801	0.497	0.411	1.31442e-282	gCap	Pdap1
1.787e-285	0.375699	0.512	0.424	4.28557e-281	gCap	Akap9
1.96296e-285	0.309958	0.44	0.332	4.70756e-281	gCap	Ccdc50
7.42e-285	0.262595	0.253	0.152	1.77946e-280	gCap	Rarg
4.48238e-284	0.253669	0.565	0.461	1.07496e-279	gCap	Mtch1
4.75075e-284	0.310607	0.399	0.297	1.13932e-279	gCap	Mgat1
1.52373e-283	0.271475	0.22	0.126	3.65422e-279	gCap	Acvr1
7.0296e-282	0.324323	0.582	0.508	1.68584e-277	gCap	Ubn1
1.0614e-281	0.330928	0.422	0.325	2.54545e-277	gCap	Zfp326
1.58782e-279	0.29426	0.494	0.392	3.80792e-275	gCap	Midn
3.56022e-279	0.300799	0.249	0.152	8.53813e-275	gCap	Acvr1b
2.49389e-278	0.289464	0.468	0.343	5.98085e-274	gCap	Slco3a1
1.32607e-276	0.285534	0.259	0.161	3.18017e-272	gCap	Arfgap3
2.37523e-275	0.296683	0.374	0.268	5.69627e-271	gCap	Prkd3
1.45245e-274	0.31035	0.751	0.707	3.48328e-270	gCap	Usp34
3.11542e-273	0.281636	0.38	0.279	7.4714e-269	gCap	Psmc1
3.07627e-271	0.253399	0.209	0.117	7.3775e-267	gCap	Ifih1
9.07981e-271	0.28043	0.561	0.486	2.17752e-266	gCap	Ndufs5
1.07736e-268	0.280414	0.437	0.333	2.58373e-264	gCap	Rnf19a
1.66162e-268	0.267469	0.315	0.214	3.9849e-264	gCap	Prkar2a
2.67232e-268	0.322327	0.648	0.59	6.40875e-264	gCap	Dnm2
2.74219e-267	0.339905	0.403	0.307	6.57633e-263	gCap	Brd9
1.48601e-266	0.26531	0.725	0.695	3.56376e-262	gCap	Cox6a1
3.1658e-266	0.308195	0.482	0.388	7.59221e-262	gCap	Vezf1
6.20301e-266	0.322355	0.355	0.256	1.48761e-261	gCap	Ccdc82
6.27696e-266	0.260821	0.227	0.134	1.50534e-261	gCap	Ubr7
9.09644e-265	0.330956	0.294	0.193	2.18151e-260	gCap	Stat2
4.25507e-264	0.395954	0.159	0.078	1.02045e-259	gCap	Macrod2
4.29653e-264	0.290166	0.727	0.68	1.03039e-259	gCap	Eif3a
1.79799e-263	0.28565	0.615	0.549	4.31195e-259	gCap	Nol7
9.3112e-263	0.33239	0.449	0.356	2.23301e-258	gCap	Tbk1
4.01631e-260	0.3118	0.657	0.603	9.63191e-256	gCap	Mier1
1.62098e-259	0.293899	0.644	0.607	3.88743e-255	gCap	Pcbp1
1.08571e-258	0.317003	0.308	0.213	2.60374e-254	gCap	Rai1
1.6308e-258	0.295436	0.6	0.546	3.91098e-254	gCap	Csnk2a1
1.93221e-258	0.283635	0.466	0.375	4.63384e-254	gCap	Akt1
2.41639e-256	0.269516	0.303	0.201	5.79499e-252	gCap	Rhbdf2
5.89016e-254	0.258331	0.273	0.177	1.41258e-249	gCap	Ppp1r37
8.12222e-254	0.27113	0.665	0.619	1.94787e-249	gCap	Smdt1
1.35382e-253	0.264819	0.247	0.155	3.24674e-249	gCap	Smad5
2.35767e-253	0.26991	0.336	0.232	5.65417e-249	gCap	Golim4
2.44136e-252	0.313358	0.528	0.443	5.85487e-248	gCap	Tbl1x
1.21427e-250	0.268144	0.332	0.233	2.91206e-246	gCap	Dpf2
3.74189e-250	0.269293	0.265	0.17	8.97379e-246	gCap	Cep68
4.44627e-250	0.305711	0.298	0.202	1.0663e-245	gCap	Ezh1
3.49054e-249	0.294042	0.498	0.418	8.37102e-245	gCap	Psmd7
7.4567e-249	0.304943	0.318	0.224	1.78827e-244	gCap	Anapc1
2.83994e-248	0.261047	0.759	0.732	6.81075e-244	gCap	Hnrnpu
5.99645e-248	0.257034	0.625	0.549	1.43807e-243	gCap	Rps27l
6.00768e-247	0.293992	0.247	0.152	1.44076e-242	gCap	Sox4
2.2824e-246	0.302131	0.425	0.337	5.47365e-242	gCap	Abhd17a
4.95729e-246	0.311723	0.452	0.362	1.18886e-241	gCap	Trak1
3.14843e-245	0.302565	0.493	0.416	7.55058e-241	gCap	Cdv3
3.21961e-245	0.296355	0.314	0.217	7.72126e-241	gCap	Zdhhc17
2.26116e-242	0.337782	0.326	0.23	5.42271e-238	gCap	Parp14
2.59608e-242	0.300946	0.394	0.292	6.22593e-238	gCap	Otud7b
2.05726e-241	0.346226	0.392	0.297	4.93373e-237	gCap	Pim3
3.19001e-239	0.277803	0.413	0.323	7.65029e-235	gCap	Ccdc47
6.03215e-238	0.267045	0.435	0.338	1.44663e-233	gCap	Wasl
4.78563e-235	0.289941	0.442	0.351	1.14769e-230	gCap	Ppp1r12c
7.18985e-235	0.385488	0.156	0.08	1.72427e-230	gCap	Slc24a3
3.90723e-232	0.273249	0.363	0.273	9.37031e-228	gCap	Clptm1
8.17712e-232	0.276269	0.161	0.085	1.96104e-227	gCap	Cep112
2.47922e-231	0.307823	0.189	0.108	5.94566e-227	gCap	Eml6
9.35604e-231	0.295151	0.523	0.462	2.24376e-226	gCap	Psma6
7.65953e-229	0.290074	0.533	0.463	1.83691e-224	gCap	Bax
1.59981e-228	0.267542	0.526	0.452	3.83666e-224	gCap	Rala
1.45174e-225	0.300836	0.336	0.249	3.48157e-221	gCap	Dicer1
6.78198e-225	0.274177	0.468	0.378	1.62645e-220	gCap	Stx7
8.35407e-225	0.263365	0.263	0.174	2.00347e-220	gCap	3110082I17Rik
2.6344e-224	0.272596	0.368	0.28	6.31782e-220	gCap	Pitpnb
6.28723e-223	0.284229	0.231	0.146	1.5078e-218	gCap	0610010F05Rik
1.69659e-222	0.27002	0.255	0.168	4.06876e-218	gCap	Iars
9.29155e-222	0.297522	0.518	0.443	2.2283e-217	gCap	Per1
2.74113e-221	0.304218	0.293	0.202	6.57378e-217	gCap	Fam102b
1.43443e-220	0.272445	0.466	0.389	3.44004e-216	gCap	Vdac3
2.72271e-220	0.31531	0.468	0.384	6.5296e-216	gCap	Atp11c
4.40331e-217	0.282759	0.417	0.316	1.056e-212	gCap	A330023F24Rik
5.09173e-217	0.26451	0.322	0.232	1.2211e-212	gCap	Rprd1b
1.14426e-215	0.294951	0.42	0.34	2.74416e-211	gCap	Ubtf
8.15846e-213	0.265343	0.727	0.689	1.95656e-208	gCap	Ash1l
9.23592e-213	0.251242	0.31	0.222	2.21496e-208	gCap	Acot9
6.17615e-211	0.269375	0.293	0.198	1.48116e-206	gCap	Sh3rf1
2.67885e-210	0.292909	0.451	0.372	6.42443e-206	gCap	Rasa1
3.08793e-210	0.251809	0.605	0.521	7.40548e-206	gCap	Cdk17
5.61128e-210	0.250194	0.515	0.455	1.3457e-205	gCap	Arpc1a
3.2138e-209	0.28027	0.624	0.577	7.70735e-205	gCap	Senp6
1.47991e-207	0.286939	0.314	0.229	3.54913e-203	gCap	Slc30a9
1.85175e-207	0.272426	0.592	0.534	4.44087e-203	gCap	Irf2bp2
1.71143e-206	0.292234	0.511	0.44	4.10434e-202	gCap	Fubp1
2.00662e-206	0.255517	0.604	0.546	4.81227e-202	gCap	Elf2
3.97038e-206	0.266852	0.431	0.351	9.52176e-202	gCap	Ilk
1.46753e-205	0.26121	0.664	0.623	3.51944e-201	gCap	Erbin
6.82116e-205	0.348923	0.332	0.24	1.63585e-200	gCap	Pbx3
4.81602e-204	0.251488	0.319	0.235	1.15498e-199	gCap	Ext2
1.33583e-203	0.256765	0.421	0.335	3.20358e-199	gCap	Map2k3
3.1773e-201	0.277039	0.283	0.2	7.61979e-197	gCap	Atxn3
8.4227e-201	0.265179	0.576	0.527	2.01993e-196	gCap	Cbx3
1.13253e-199	0.250359	0.187	0.112	2.71603e-195	gCap	Iqsec2
2.63856e-199	0.307917	0.498	0.434	6.32779e-195	gCap	Arid2
5.60718e-199	0.284053	0.441	0.365	1.34471e-194	gCap	Vps36
1.56122e-198	0.274289	0.431	0.35	3.74411e-194	gCap	Tap2
1.77348e-197	0.312867	0.467	0.401	4.25315e-193	gCap	Herc2
3.58996e-197	0.298456	0.418	0.344	8.60944e-193	gCap	Sfswap
6.59696e-196	0.279096	0.485	0.41	1.58208e-191	gCap	Ptpra
3.76822e-195	0.299448	0.207	0.128	9.03695e-191	gCap	Nr3c2
8.28594e-194	0.258331	0.436	0.364	1.98713e-189	gCap	Sar1a
1.63349e-193	0.279756	0.367	0.287	3.91743e-189	gCap	Ppp2r2d
3.16027e-193	0.276425	0.45	0.378	7.57895e-189	gCap	Psmd1
3.35734e-191	0.294684	0.517	0.447	8.05156e-187	gCap	Atf7
1.32775e-190	0.287571	0.467	0.399	3.1842e-186	gCap	Hnrnpr
1.05141e-189	0.2693	0.519	0.465	2.52148e-185	gCap	Pcnp
4.44312e-189	0.260346	0.345	0.264	1.06555e-184	gCap	Fam114a2
6.50203e-186	0.253807	0.664	0.637	1.55932e-181	gCap	Eif3c
8.70233e-186	0.286802	0.403	0.33	2.08699e-181	gCap	Atxn2
9.66605e-186	0.29928	0.521	0.465	2.31811e-181	gCap	Smc1a
2.02429e-185	0.263683	0.326	0.247	4.85465e-181	gCap	Brd3
3.43694e-185	0.252505	0.523	0.468	8.24248e-181	gCap	Rnf187
1.17196e-184	0.282083	0.369	0.284	2.8106e-180	gCap	Exoc6
1.47477e-184	0.279919	0.45	0.387	3.5368e-180	gCap	Prrc2a
1.41252e-183	0.266097	0.383	0.305	3.38751e-179	gCap	Snrnp27
2.56977e-183	0.263824	0.42	0.342	6.16281e-179	gCap	Ap2a2
4.30371e-181	0.28644	0.458	0.392	1.03212e-176	gCap	Mark3
4.50785e-180	0.312254	0.532	0.479	1.08107e-175	gCap	Zfp638
1.03642e-179	0.309053	0.356	0.283	2.48554e-175	gCap	Clock
5.26566e-176	0.255701	0.425	0.358	1.26281e-171	gCap	Setd3
4.86424e-174	0.280018	0.351	0.276	1.16654e-169	gCap	Dpp8
7.38129e-174	0.252282	0.464	0.408	1.77018e-169	gCap	Ndufa8
8.75177e-174	0.251122	0.451	0.372	2.09885e-169	gCap	Nfatc1
1.60209e-173	0.257761	0.269	0.192	3.84212e-169	gCap	St7l
2.04422e-173	0.293416	0.161	0.095	4.90246e-169	gCap	Gbp4
7.63461e-173	0.275181	0.45	0.379	1.83093e-168	gCap	Rabgap1
1.82567e-172	0.250062	0.269	0.193	4.37833e-168	gCap	Irf3
1.29183e-169	0.292391	0.501	0.442	3.09807e-165	gCap	Zc3h7a
1.49575e-169	0.255	0.643	0.625	3.5871e-165	gCap	Srrm1
4.61978e-168	0.261468	0.288	0.214	1.10791e-163	gCap	Ice1
8.86104e-167	0.277923	0.453	0.383	2.12505e-162	gCap	Kat2b
1.57129e-166	0.271201	0.458	0.392	3.76827e-162	gCap	Mon2
1.17376e-165	0.269412	0.557	0.517	2.8149e-161	gCap	Ddx24
4.44658e-162	0.269775	0.481	0.418	1.06638e-157	gCap	Eps15
7.73506e-162	0.275593	0.382	0.312	1.85502e-157	gCap	Cdc37l1
2.48477e-161	0.572801	0.412	0.362	5.95897e-157	gCap	Ivns1abp
6.51948e-161	0.275956	0.606	0.567	1.5635e-156	gCap	Med13l
4.24847e-160	0.27809	0.378	0.313	1.01887e-155	gCap	Golga4
2.73966e-159	0.254144	0.22	0.149	6.57025e-155	gCap	Herc6
3.01407e-159	0.308974	0.582	0.545	7.22833e-155	gCap	Pnisr
2.80856e-156	0.287222	0.362	0.291	6.73549e-152	gCap	Reps1
3.76939e-156	0.292358	0.508	0.463	9.03976e-152	gCap	Fam193a
2.66548e-155	0.255265	0.469	0.4	6.39235e-151	gCap	Fbxw7
3.84464e-155	0.261283	0.538	0.495	9.22023e-151	gCap	Cul1
1.4535e-154	0.259963	0.376	0.309	3.48578e-150	gCap	Marf1
1.96565e-154	0.256603	0.375	0.296	4.71403e-150	gCap	Gm37240
7.47952e-154	0.329711	0.183	0.12	1.79374e-149	gCap	Mid1
1.89896e-153	0.26852	0.366	0.297	4.55409e-149	gCap	Trio
4.39354e-153	0.272026	0.344	0.281	1.05366e-148	gCap	Tmem259
5.68396e-145	0.267696	0.341	0.277	1.36313e-140	gCap	Zranb2
1.49127e-140	0.260216	0.347	0.28	3.57637e-136	gCap	Dennd6a
9.58483e-139	0.252417	0.597	0.571	2.29863e-134	gCap	Pbrm1
1.43784e-135	0.251033	0.342	0.284	3.44824e-131	gCap	Srsf1
3.25435e-134	0.253816	0.607	0.572	7.80458e-130	gCap	Ubn2
4.19167e-130	0.253516	0.502	0.459	1.00525e-125	gCap	Pnn
2.56041e-129	0.260244	0.598	0.577	6.14038e-125	gCap	Eif5b
2.85233e-127	0.259266	0.358	0.298	6.84046e-123	gCap	Zmym4
1.88439e-120	0.250234	0.587	0.567	4.51915e-116	gCap	Thoc2
2.01978e-119	0.264615	0.415	0.368	4.84383e-115	gCap	Baz1b
2.49039e-114	0.261858	0.279	0.221	5.97245e-110	gCap	Vwa8
4.95612e-114	0.258457	0.43	0.382	1.18858e-109	gCap	Golgb1
5.47769e-103	0.2649	0.473	0.444	1.31366e-98	gCap	Bod1l
2.94516e-102	0.272066	0.553	0.537	7.06307e-98	gCap	Sltm
1.19937e-44	0.297953	0.465	0.48	2.87634e-40	gCap	Ppp1r10
1.32142e-08	0.27212	0.918	0.922	0.000316903	gCap	Camk1d
0	5.11178	0.963	0.103	0	B-cells	Igkc
0	4.59112	0.996	0.039	0	B-cells	Cd79a
0	4.47789	0.999	0.139	0	B-cells	Ebf1
0	4.02456	0.977	0.03	0	B-cells	Bank1
0	3.94385	0.999	0.437	0	B-cells	Cd74
0	3.94011	0.996	0.156	0	B-cells	Ighm
0	3.79446	0.951	0.026	0	B-cells	Ly6d
0	3.78561	0.989	0.037	0	B-cells	Cd79b
0	3.25209	0.887	0.02	0	B-cells	Iglc2
0	3.08144	0.988	0.3	0	B-cells	H2-Aa
0	3.08079	0.988	0.25	0	B-cells	H2-Eb1
0	2.88975	0.976	0.38	0	B-cells	Mef2c
0	2.88136	0.938	0.022	0	B-cells	Ighd
0	2.83752	0.99	0.327	0	B-cells	H2-Ab1
0	2.76743	0.917	0.012	0	B-cells	Pax5
0	2.71424	0.888	0.013	0	B-cells	Ms4a1
0	2.70751	0.924	0.107	0	B-cells	Ralgps2
0	2.67242	0.88	0.013	0	B-cells	Fcmr
0	2.56144	0.82	0.013	0	B-cells	Iglc3
0	2.50355	0.891	0.28	0	B-cells	Man1a
0	2.46539	0.965	0.185	0	B-cells	Cd37
0	2.42326	0.913	0.248	0	B-cells	Rel
0	2.35434	0.837	0.066	0	B-cells	Btla
0	2.32314	0.418	0.01	0	B-cells	Iglc1
0	2.26032	0.948	0.224	0	B-cells	Prkcb
0	2.24199	0.877	0.04	0	B-cells	H2-Ob
0	2.23893	0.835	0.02	0	B-cells	Blnk
0	2.22308	0.975	0.249	0	B-cells	Syk
0	2.20043	0.84	0.131	0	B-cells	March1
0	2.19363	0.872	0.022	0	B-cells	H2-DMb2
0	2.15326	0.728	0.008	0	B-cells	Gm31243
0	2.10849	0.737	0.082	0	B-cells	Pgap1
0	2.0828	0.715	0.059	0	B-cells	Tmem163
0	2.06382	0.973	0.32	0	B-cells	Fam107b
0	2.05715	0.907	0.272	0	B-cells	Snx5
0	2.04991	0.862	0.167	0	B-cells	Dusp2
0	2.03767	0.827	0.108	0	B-cells	Ikzf3
0	2.03696	0.976	0.284	0	B-cells	Ripor2
0	2.01135	0.829	0.487	0	B-cells	Fchsd2
0	1.98179	0.828	0.061	0	B-cells	Ly86
0	1.95032	0.971	0.604	0	B-cells	Bach2
0	1.93774	0.706	0.206	0	B-cells	Immp2l
0	1.91985	0.789	0.076	0	B-cells	Cd55
0	1.91842	0.709	0.069	0	B-cells	Slc9a7
0	1.90989	0.752	0.118	0	B-cells	Ero1lb
0	1.8977	0.873	0.171	0	B-cells	Ltb
0	1.86309	0.675	0.022	0	B-cells	Bcl11a
0	1.85464	0.994	0.402	0	B-cells	Arhgap15
0	1.84451	0.683	0.011	0	B-cells	Pou2af1
0	1.82158	0.986	0.319	0	B-cells	Mir142hg
0	1.75115	0.851	0.268	0	B-cells	Dgkd
0	1.71922	0.779	0.24	0	B-cells	Snx29
0	1.71389	0.756	0.102	0	B-cells	Hvcn1
0	1.70933	0.587	0.015	0	B-cells	Vpreb3
0	1.70288	0.708	0.021	0	B-cells	Fcrla
0	1.67178	0.654	0.01	0	B-cells	Blk
0	1.66742	0.865	0.287	0	B-cells	Arhgef18
0	1.65475	1	0.996	0	B-cells	Rps27
0	1.65013	0.835	0.135	0	B-cells	Ptprcap
0	1.64351	0.984	0.409	0	B-cells	Stk17b
0	1.63814	0.967	0.71	0	B-cells	Foxn3
0	1.63736	0.781	0.264	0	B-cells	Myo1e
0	1.63366	0.879	0.301	0	B-cells	Apobec3
0	1.56247	0.632	0.007	0	B-cells	Mzb1
0	1.55818	0.847	0.367	0	B-cells	Nfatc3
0	1.5331	0.841	0.183	0	B-cells	H2-DMa
0	1.53271	0.719	0.206	0	B-cells	St6gal1
0	1.52927	0.927	0.158	0	B-cells	Napsa
0	1.52635	0.999	0.942	0	B-cells	Foxp1
0	1.52292	0.712	0.16	0	B-cells	Slc38a1
0	1.51961	0.577	0.009	0	B-cells	Fcer2a
0	1.51918	0.662	0.014	0	B-cells	Siglecg
0	1.51677	0.55	0.074	0	B-cells	Cd86
0	1.5154	0.905	0.632	0	B-cells	Fbxo11
0	1.5	0.5	0.037	0	B-cells	Cecr2
0	1.49264	0.791	0.246	0	B-cells	Pde7a
0	1.48676	1	0.966	0	B-cells	Rps15a
0	1.48462	0.587	0.052	0	B-cells	Cd83
0	1.48218	0.617	0.097	0	B-cells	Cd69
0	1.47873	0.865	0.386	0	B-cells	Pkig
0	1.47369	0.721	0.115	0	B-cells	Gm8369
0	1.46056	0.895	0.384	0	B-cells	Serp1
0	1.45622	1	0.992	0	B-cells	Rps24
0	1.44987	1	0.987	0	B-cells	Rpl18a
0	1.44928	1	0.991	0	B-cells	H3f3a
0	1.44826	0.658	0.12	0	B-cells	Txndc16
0	1.44648	0.681	0.069	0	B-cells	Pou2f2
0	1.4462	0.695	0.095	0	B-cells	Ccr7
0	1.44051	0.876	0.36	0	B-cells	Birc3
0	1.42651	0.642	0.201	0	B-cells	Eif2ak3
0	1.42581	1	0.998	0	B-cells	Fau
0	1.42236	0.778	0.145	0	B-cells	Wdfy4
0	1.42077	0.955	0.644	0	B-cells	Inpp5d
0	1.42062	0.632	0.022	0	B-cells	H2-Oa
0	1.41956	0.572	0.006	0	B-cells	Tnfrsf13c
0	1.41618	0.651	0.011	0	B-cells	Cd19
0	1.40237	0.98	0.674	0	B-cells	Zfp36l2
0	1.39101	0.702	0.121	0	B-cells	Rhoh
0	1.38741	0.603	0.013	0	B-cells	Fcrl1
0	1.38419	0.998	0.651	0	B-cells	Btg1
0	1.38303	0.536	0.031	0	B-cells	Gm15987
0	1.37904	0.831	0.352	0	B-cells	Snx2
0	1.37554	0.817	0.315	0	B-cells	Smap2
0	1.37252	0.968	0.575	0	B-cells	Ets1
0	1.37249	0.907	0.368	0	B-cells	Pdcd4
0	1.36506	0.999	0.976	0	B-cells	Rps13
0	1.36032	0.622	0.111	0	B-cells	P2ry10
0	1.35979	0.738	0.187	0	B-cells	Tmem131l
0	1.35811	0.739	0.256	0	B-cells	Malt1
0	1.35745	1	0.968	0	B-cells	Rps7
0	1.34797	0.985	0.392	0	B-cells	Coro1a
0	1.34359	0.923	0.58	0	B-cells	Cyth1
0	1.34344	1	0.959	0	B-cells	Rps19
0	1.33653	1	0.911	0	B-cells	Rpl12
0	1.33532	0.879	0.474	0	B-cells	Rabgap1l
0	1.3227	0.559	0.049	0	B-cells	Ap1s3
0	1.3226	0.963	0.39	0	B-cells	Dock2
0	1.32171	0.999	0.983	0	B-cells	Rpl39
0	1.32149	0.699	0.157	0	B-cells	Cmah
0	1.31619	0.743	0.361	0	B-cells	Dmxl1
0	1.31405	0.734	0.306	0	B-cells	Strbp
0	1.31214	0.762	0.296	0	B-cells	Map3k1
0	1.30497	1	0.968	0	B-cells	Rps20
0	1.30483	0.677	0.226	0	B-cells	Dipk1a
0	1.29854	0.999	0.952	0	B-cells	Rps26
0	1.29622	0.907	0.564	0	B-cells	Zfp36l1
0	1.29055	0.798	0.262	0	B-cells	Unc93b1
0	1.28645	0.781	0.411	0	B-cells	Foxo1
0	1.28273	0.849	0.468	0	B-cells	Slc12a6
0	1.27893	0.963	0.396	0	B-cells	Arhgdib
0	1.27893	0.73	0.36	0	B-cells	Nsf
0	1.27099	1	0.967	0	B-cells	Rps28
0	1.26814	0.763	0.346	0	B-cells	Sesn1
0	1.26683	0.852	0.323	0	B-cells	Crlf3
0	1.26054	0.878	0.5	0	B-cells	Smim14
0	1.25836	0.614	0.11	0	B-cells	Snx30
0	1.25651	1	0.987	0	B-cells	Rpl34
0	1.25167	0.864	0.294	0	B-cells	Gm26740
0	1.24612	0.978	0.607	0	B-cells	Lyn
0	1.23818	0.772	0.369	0	B-cells	Eml4
0	1.23611	0.842	0.191	0	B-cells	Satb1
0	1.22429	0.586	0.121	0	B-cells	Serpinb1a
0	1.2241	0.762	0.338	0	B-cells	Mtss1
0	1.21788	1	0.949	0	B-cells	Rpsa
0	1.21767	1	0.963	0	B-cells	Rpl32
0	1.21497	0.982	0.393	0	B-cells	Cd52
0	1.213	0.67	0.229	0	B-cells	Glcci1
0	1.20533	1	0.991	0	B-cells	Rps21
0	1.20486	0.621	0.126	0	B-cells	Tec
0	1.20417	0.773	0.286	0	B-cells	Dock11
0	1.20284	1	0.984	0	B-cells	Rps3a1
0	1.20114	0.999	0.964	0	B-cells	Rps5
0	1.20043	1	0.991	0	B-cells	Rps10
0	1.18587	0.763	0.275	0	B-cells	Ptk2b
0	1.18543	0.645	0.172	0	B-cells	Stat4
0	1.18541	0.49	0.023	0	B-cells	Chst3
0	1.18436	0.962	0.41	0	B-cells	Cytip
0	1.18034	0.526	0.035	0	B-cells	Cd72
0	1.18023	1	0.989	0	B-cells	Rpl17
0	1.17732	0.587	0.086	0	B-cells	Btk
0	1.17021	0.809	0.264	0	B-cells	Itga4
0	1.17008	0.819	0.492	0	B-cells	Med13
0	1.16527	0.999	0.892	0	B-cells	Rpl10a
0	1.15066	0.664	0.224	0	B-cells	Tbc1d1
0	1.14804	0.675	0.249	0	B-cells	Bmp2k
0	1.14472	1	0.989	0	B-cells	Rpl30
0	1.14091	1	0.994	0	B-cells	Rpl27a
0	1.13886	0.621	0.089	0	B-cells	Kcnq5
0	1.1294	1	0.994	0	B-cells	Rps16
0	1.12507	1	0.989	0	B-cells	Rpl13
0	1.12364	0.718	0.333	0	B-cells	Rfx7
0	1.12339	0.64	0.154	0	B-cells	Plcg2
0	1.12216	1	0.994	0	B-cells	Rpl23
0	1.12105	0.528	0.113	0	B-cells	Phtf2
0	1.11887	0.86	0.486	0	B-cells	Tut4
0	1.1182	0.664	0.202	0	B-cells	Ptpn6
0	1.1171	1	0.996	0	B-cells	Rpl37a
0	1.11583	0.817	0.408	0	B-cells	Sp100
0	1.11034	0.621	0.217	0	B-cells	Plcl2
0	1.10982	0.655	0.219	0	B-cells	Pold4
0	1.10886	0.745	0.364	0	B-cells	Csnk1g3
0	1.10654	1	0.979	0	B-cells	Rpl8
0	1.10588	0.81	0.219	0	B-cells	Xylt1
0	1.10298	1	0.986	0	B-cells	Rpl21
0	1.09721	0.586	0.206	0	B-cells	Rps6ka5
0	1.09617	0.798	0.49	0	B-cells	Herc4
0	1.09275	0.459	0.007	0	B-cells	Spib
0	1.09198	1	0.991	0	B-cells	Rpl35a
0	1.08912	0.556	0.079	0	B-cells	Snx8
0	1.08852	0.999	0.943	0	B-cells	Rps18
0	1.08684	0.457	0.052	0	B-cells	Gm43305
0	1.08629	0.685	0.212	0	B-cells	Inpp4b
0	1.08385	0.66	0.256	0	B-cells	Pde3b
0	1.08221	1	0.987	0	B-cells	Rpl19
0	1.07912	0.779	0.456	0	B-cells	Ppp1r16b
0	1.07518	0.731	0.27	0	B-cells	Il2rg
0	1.07458	0.999	0.971	0	B-cells	Rpl18
0	1.07297	0.758	0.418	0	B-cells	Lmbrd1
0	1.0718	0.999	0.962	0	B-cells	Rpl27
0	1.07074	1	0.998	0	B-cells	Rps29
0	1.06724	0.514	0.089	0	B-cells	Zfp831
0	1.06001	1	0.965	0	B-cells	Rpl36
0	1.05711	0.999	0.97	0	B-cells	Rps3
0	1.04949	0.367	0.003	0	B-cells	Gm30211
0	1.04924	1	0.987	0	B-cells	Rpl9
0	1.04795	0.999	0.981	0	B-cells	Rps11
0	1.04766	1	0.96	0	B-cells	Rps4x
0	1.04737	0.528	0.092	0	B-cells	Stap1
0	1.04224	0.492	0.114	0	B-cells	Rasgef1b
0	1.04074	0.953	0.714	0	B-cells	Uba52
0	1.0387	0.401	0.017	0	B-cells	Irf4
0	1.03592	0.909	0.659	0	B-cells	Fli1
0	1.03185	0.72	0.313	0	B-cells	Mndal
0	1.0291	1	0.986	0	B-cells	Rpl38
0	1.02835	1	0.973	0	B-cells	Rpl13a
0	1.02383	0.671	0.178	0	B-cells	Ptpn22
0	1.0194	0.748	0.379	0	B-cells	Kdm7a
0	1.01622	0.595	0.164	0	B-cells	Dapp1
0	1.01522	0.457	0.164	0	B-cells	2610035D17Rik
0	1.00875	0.509	0.169	0	B-cells	Cobll1
0	1.00821	0.847	0.511	0	B-cells	Arhgap26
0	1.00696	1	0.979	0	B-cells	Rpl11
0	1.00543	0.48	0.028	0	B-cells	Cd22
0	1.00312	0.988	0.794	0	B-cells	Junb
0	1.00073	0.612	0.171	0	B-cells	Cnp
0	1.00009	0.53	0.138	0	B-cells	Nfkbid
0	0.997438	0.856	0.251	0	B-cells	Sorl1
0	0.995925	0.68	0.279	0	B-cells	Lrrk2
0	0.992504	0.65	0.141	0	B-cells	Irf8
0	0.990117	0.405	0.052	0	B-cells	Pkib
0	0.988659	0.691	0.331	0	B-cells	Arhgap17
0	0.984544	0.999	0.94	0	B-cells	Rpl35
0	0.982594	0.806	0.479	0	B-cells	2410006H16Rik
0	0.979997	0.515	0.124	0	B-cells	Zfp318
0	0.9788	0.693	0.295	0	B-cells	Rasa3
0	0.978232	0.955	0.769	0	B-cells	Slc38a2
0	0.97796	0.628	0.254	0	B-cells	Ifi203
0	0.97795	0.671	0.282	0	B-cells	Mta3
0	0.977481	0.8	0.502	0	B-cells	Tgfb1
0	0.977177	0.688	0.322	0	B-cells	Arpc5l
0	0.974975	0.935	0.715	0	B-cells	Shisa5
0	0.974342	0.778	0.274	0	B-cells	Limd2
0	0.974059	0.573	0.088	0	B-cells	Chchd10
0	0.972522	0.448	0.081	0	B-cells	Arl5c
0	0.969625	0.999	0.974	0	B-cells	Rpl6
0	0.968951	0.423	0.026	0	B-cells	Gm15675
0	0.967773	0.51	0.094	0	B-cells	Ifi209
0	0.966993	0.664	0.339	0	B-cells	Jarid2
0	0.96676	0.604	0.151	0	B-cells	Acp5
0	0.964861	1	0.987	0	B-cells	Rps9
0	0.96277	0.488	0.103	0	B-cells	Lamb3
0	0.961173	0.999	0.91	0	B-cells	Rpl3
0	0.959182	0.604	0.185	0	B-cells	Cmtm7
0	0.956113	0.9	0.524	0	B-cells	Rapgef6
0	0.953365	0.727	0.382	0	B-cells	Plekha2
0	0.95278	0.718	0.36	0	B-cells	Cerk
0	0.952457	0.999	0.956	0	B-cells	Rps2
0	0.94812	0.357	0.052	0	B-cells	E330020D12Rik
0	0.947766	0.818	0.544	0	B-cells	Arid1b
0	0.944009	0.464	0.036	0	B-cells	Cxcr5
0	0.940718	0.781	0.305	0	B-cells	Arhgap45
0	0.934552	0.941	0.835	0	B-cells	Ppp3ca
0	0.934045	0.778	0.435	0	B-cells	Sik1
0	0.930015	0.998	0.934	0	B-cells	Rpl22
0	0.92473	0.725	0.386	0	B-cells	Ccm2
0	0.924127	0.999	0.964	0	B-cells	Rpl7
0	0.923888	0.514	0.167	0	B-cells	Slc4a7
0	0.923279	0.61	0.254	0	B-cells	Snx9
0	0.919073	0.319	0.002	0	B-cells	Gm43388
0	0.918488	1	0.989	0	B-cells	Rps8
0	0.916029	0.554	0.223	0	B-cells	Traf3
0	0.911821	0.471	0.06	0	B-cells	A630001G21Rik
0	0.90951	0.294	0.029	0	B-cells	Rab30
0	0.90644	0.368	0.048	0	B-cells	Kynu
0	0.904106	0.836	0.326	0	B-cells	Runx1
0	0.903128	0.388	0.031	0	B-cells	Cd180
0	0.90134	0.784	0.547	0	B-cells	Aff1
0	0.901127	0.567	0.211	0	B-cells	1110059E24Rik
0	0.899955	0.408	0.037	0	B-cells	Ms4a4c
0	0.899844	0.94	0.713	0	B-cells	Eif3f
0	0.899279	0.772	0.419	0	B-cells	Stk24
0	0.896539	0.715	0.303	0	B-cells	Sh3kbp1
0	0.895824	0.263	0.012	0	B-cells	Cacna1e
0	0.895483	1	0.996	0	B-cells	Rpl37
0	0.893355	0.537	0.161	0	B-cells	Lpgat1
0	0.893251	0.449	0.126	0	B-cells	Cpm
0	0.892562	0.835	0.492	0	B-cells	Gm11808
0	0.892382	0.391	0.013	0	B-cells	Trim7
0	0.888868	0.686	0.363	0	B-cells	Trim25
0	0.884302	0.658	0.327	0	B-cells	Otulin
0	0.883529	0.999	0.979	0	B-cells	Rpl26
0	0.882872	0.999	0.974	0	B-cells	Rps25
0	0.878817	0.626	0.279	0	B-cells	Mylip
0	0.877948	0.999	0.979	0	B-cells	Rplp2
0	0.877313	0.391	0.125	0	B-cells	Adamts6
0	0.876496	0.866	0.315	0	B-cells	Rac2
0	0.872356	0.998	0.944	0	B-cells	Rpl15
0	0.872016	0.719	0.385	0	B-cells	Cdc42se2
0	0.871189	0.694	0.307	0	B-cells	Rps27rt
0	0.87067	0.753	0.503	0	B-cells	Hivep2
0	0.867526	0.462	0.055	0	B-cells	Rnase6
0	0.865876	0.428	0.091	0	B-cells	Gpr183
0	0.865711	0.435	0.059	0	B-cells	Ciita
0	0.86498	0.57	0.217	0	B-cells	Ppp3cc
0	0.864838	0.319	0.029	0	B-cells	Tmem108
0	0.863318	0.528	0.127	0	B-cells	Vars
0	0.861837	0.596	0.225	0	B-cells	Nrros
0	0.860332	0.953	0.807	0	B-cells	Elmo1
0	0.85919	0.653	0.312	0	B-cells	Tcp11l2
0	0.858956	0.404	0.057	0	B-cells	BE692007
0	0.858214	0.753	0.509	0	B-cells	Akt3
0	0.857349	0.703	0.345	0	B-cells	Csk
0	0.851532	0.636	0.344	0	B-cells	Tob2
0	0.85137	0.427	0.051	0	B-cells	Map4k1
0	0.851277	0.995	0.895	0	B-cells	Rpl36a
0	0.847879	0.65	0.32	0	B-cells	Pxk
0	0.847708	1	0.991	0	B-cells	Rps12
0	0.846682	0.754	0.47	0	B-cells	Gpbp1
0	0.841394	0.759	0.289	0	B-cells	Ikzf1
0	0.840579	0.513	0.127	0	B-cells	Scml4
0	0.840447	0.979	0.881	0	B-cells	Tsc22d3
0	0.839414	0.433	0.053	0	B-cells	Gga2
0	0.838641	0.844	0.642	0	B-cells	Arid4b
0	0.838183	0.998	0.906	0	B-cells	Rack1
0	0.837118	0.854	0.617	0	B-cells	Elf1
0	0.836955	0.656	0.263	0	B-cells	Retreg1
0	0.832479	0.562	0.19	0	B-cells	Neurl3
0	0.831622	0.486	0.117	0	B-cells	Plac8
0	0.826685	1	0.993	0	B-cells	Rps27a
0	0.82656	0.601	0.155	0	B-cells	Gramd3
0	0.817623	0.741	0.371	0	B-cells	Gimap1
0	0.817451	0.928	0.713	0	B-cells	Snrpg
0	0.817195	0.454	0.147	0	B-cells	Atg16l2
0	0.81677	1	0.983	0	B-cells	Rpl28
0	0.816662	0.997	0.941	0	B-cells	Rpl29
0	0.816306	0.568	0.177	0	B-cells	Cd2
0	0.815187	0.783	0.431	0	B-cells	Ezr
0	0.814823	0.408	0.067	0	B-cells	Il21r
0	0.811641	0.492	0.123	0	B-cells	Dok3
0	0.81127	0.641	0.38	0	B-cells	Mlxip
0	0.81087	0.998	0.957	0	B-cells	Rpl10
0	0.809627	0.608	0.264	0	B-cells	Arhgap25
0	0.80873	0.791	0.652	0	B-cells	Aff4
0	0.808488	0.699	0.383	0	B-cells	Sh3bp5
0	0.802502	0.395	0.039	0	B-cells	Tnfrsf13b
0	0.795557	0.304	0.008	0	B-cells	Cr2
0	0.794588	0.655	0.374	0	B-cells	Itpr1
0	0.79424	0.525	0.245	0	B-cells	Sgk3
0	0.793774	0.791	0.466	0	B-cells	Smchd1
0	0.793306	0.504	0.157	0	B-cells	Relb
0	0.79159	0.964	0.878	0	B-cells	Ccnd3
0	0.789218	0.522	0.169	0	B-cells	Mif4gd
0	0.788627	0.746	0.527	0	B-cells	Smg1
0	0.787916	0.48	0.13	0	B-cells	Card11
0	0.786479	0.8	0.325	0	B-cells	Ptpn18
0	0.786396	0.417	0.087	0	B-cells	Rubcn
0	0.785861	0.459	0.1	0	B-cells	Parp1
0	0.785429	0.602	0.238	0	B-cells	Grk6
0	0.781523	0.634	0.348	0	B-cells	Etnk1
0	0.77887	0.589	0.233	0	B-cells	Lbh
0	0.773046	0.882	0.49	0	B-cells	Fam49b
0	0.770294	0.813	0.63	0	B-cells	Lncpint
0	0.767246	0.58	0.184	0	B-cells	Cyfip2
0	0.764971	0.53	0.262	0	B-cells	Jak2
0	0.764813	0.999	0.988	0	B-cells	Rps14
0	0.76477	0.642	0.254	0	B-cells	Arhgap30
0	0.761657	0.466	0.132	0	B-cells	Tgif1
0	0.758226	0.611	0.318	0	B-cells	B3gnt2
0	0.754526	0.361	0.051	0	B-cells	Clec2i
0	0.753435	0.736	0.505	0	B-cells	Cnot6l
0	0.75267	0.686	0.38	0	B-cells	Nasp
0	0.749585	0.481	0.207	0	B-cells	Ifi30
0	0.749312	0.487	0.131	0	B-cells	Trp53i11
0	0.747493	0.988	0.95	0	B-cells	Jund
0	0.747424	0.524	0.237	0	B-cells	Plekhm3
0	0.745664	0.377	0.041	0	B-cells	B3gnt5
0	0.745024	0.836	0.631	0	B-cells	Polr2a
0	0.743819	0.384	0.043	0	B-cells	Cxxc5
0	0.743575	0.89	0.445	0	B-cells	Dennd4a
0	0.742852	0.382	0.044	0	B-cells	Sbk1
0	0.741964	1	0.983	0	B-cells	Rps23
0	0.739914	0.422	0.114	0	B-cells	N4bp2
0	0.739175	0.232	0.004	0	B-cells	Klhl14
0	0.737333	0.408	0.063	0	B-cells	Cdt1
0	0.736603	0.582	0.291	0	B-cells	Swap70
0	0.734874	0.91	0.69	0	B-cells	Rpl22l1
0	0.734661	0.342	0.042	0	B-cells	Gpr174
0	0.734236	0.581	0.284	0	B-cells	St8sia4
0	0.729792	0.301	0.048	0	B-cells	Susd1
0	0.728816	0.535	0.188	0	B-cells	Ifi27l2a
0	0.728651	0.803	0.532	0	B-cells	Grb2
0	0.728014	0.888	0.624	0	B-cells	Pnrc1
0	0.727968	0.686	0.424	0	B-cells	Rnf216
0	0.727809	0.902	0.765	0	B-cells	Ddx6
0	0.72502	0.422	0.126	0	B-cells	Gm48678
0	0.723401	0.929	0.741	0	B-cells	Actr3
0	0.72313	0.999	0.989	0	B-cells	H3f3b
0	0.721442	0.435	0.102	0	B-cells	Fam169b
0	0.72091	0.974	0.682	0	B-cells	Aff3
0	0.720903	0.779	0.449	0	B-cells	Ptprj
0	0.720661	0.513	0.204	0	B-cells	Ppp1r21
0	0.720643	0.467	0.122	0	B-cells	Traf3ip3
0	0.716725	0.693	0.402	0	B-cells	Srsf10
0	0.715644	0.528	0.285	0	B-cells	Slc10a7
0	0.711384	0.909	0.764	0	B-cells	Sub1
0	0.711207	0.998	0.908	0	B-cells	Rpl5
0	0.711038	0.602	0.369	0	B-cells	Atf7ip
0	0.709155	0.376	0.089	0	B-cells	Lpxn
0	0.708801	0.773	0.52	0	B-cells	4930523C07Rik
0	0.70791	0.88	0.714	0	B-cells	Gdi2
0	0.707443	0.469	0.179	0	B-cells	Slc1a5
0	0.706483	0.983	0.849	0	B-cells	Rpl4
0	0.706218	0.668	0.252	0	B-cells	Cxcr4
0	0.706043	0.495	0.127	0	B-cells	Il10ra
0	0.702709	0.999	0.965	0	B-cells	Rps15
0	0.701945	0.478	0.15	0	B-cells	Hip1r
0	0.698839	0.344	0.028	0	B-cells	Haao
0	0.694586	0.592	0.349	0	B-cells	Tcf20
0	0.693853	0.359	0.086	0	B-cells	Lrmp
0	0.693053	0.588	0.313	0	B-cells	Tmem123
0	0.69296	0.38	0.099	0	B-cells	Tfrc
0	0.692894	0.426	0.127	0	B-cells	Sesn3
0	0.692258	0.633	0.197	0	B-cells	Sell
0	0.689903	1	0.998	0	B-cells	Rpl41
0	0.688557	0.98	0.85	0	B-cells	Sh3bgrl3
0	0.685641	0.581	0.297	0	B-cells	Slbp
0	0.683989	0.98	0.825	0	B-cells	Eef1b2
0	0.681722	0.489	0.162	0	B-cells	Sept6
0	0.680618	0.584	0.364	0	B-cells	Smyd3
0	0.676625	0.612	0.323	0	B-cells	Ubac2
0	0.675513	0.998	0.97	0	B-cells	Rpl24
0	0.675008	0.701	0.412	0	B-cells	Gm2000
0	0.674818	0.997	0.922	0	B-cells	Rpl14
0	0.674554	0.508	0.211	0	B-cells	Rcc2
0	0.673313	0.355	0.113	0	B-cells	Prim2
0	0.672677	0.471	0.128	0	B-cells	Ncf4
0	0.671557	0.321	0.057	0	B-cells	Cnr2
0	0.669527	0.207	0.002	0	B-cells	2010309G21Rik
0	0.667938	0.409	0.115	0	B-cells	Apobec1
0	0.666572	0.805	0.612	0	B-cells	Dip2b
0	0.665724	0.78	0.505	0	B-cells	Rcsd1
0	0.664928	0.389	0.108	0	B-cells	Fam117a
0	0.664859	0.776	0.578	0	B-cells	Crebrf
0	0.664613	0.385	0.131	0	B-cells	Gem
0	0.664248	0.999	0.886	0	B-cells	Tmsb10
0	0.663219	0.728	0.474	0	B-cells	Hmgn1
0	0.657291	0.37	0.146	0	B-cells	Simc1
0	0.657286	0.515	0.211	0	B-cells	Gmip
0	0.656645	0.413	0.129	0	B-cells	Zfp1
0	0.656626	0.694	0.468	0	B-cells	Erp29
0	0.65533	0.628	0.388	0	B-cells	Abhd17b
0	0.653783	0.997	0.867	0	B-cells	Ly6e
0	0.653471	0.56	0.219	0	B-cells	B4galnt1
0	0.653166	0.747	0.524	0	B-cells	Chd2
0	0.649794	0.811	0.654	0	B-cells	Itsn2
0	0.648733	0.731	0.481	0	B-cells	Tgfbr2
0	0.647019	0.557	0.281	0	B-cells	Yeats4
0	0.643714	0.388	0.1	0	B-cells	Ctse
0	0.64246	0.907	0.745	0	B-cells	Hnrnpa0
0	0.642118	0.999	0.97	0	B-cells	Rplp0
0	0.640579	0.512	0.164	0	B-cells	Capg
0	0.639596	0.641	0.389	0	B-cells	Dennd1b
0	0.639429	0.684	0.511	0	B-cells	Fryl
0	0.639315	0.23	0.023	0	B-cells	Gm11342
0	0.638724	0.757	0.59	0	B-cells	Nfkb1
0	0.63642	0.281	0.009	0	B-cells	Gm20513
0	0.636385	0.386	0.12	0	B-cells	Myo5a
0	0.635471	1	0.995	0	B-cells	Eef1a1
0	0.634416	0.604	0.347	0	B-cells	Ppdpf
[truncated: 31,181 more rows]

## Sheet: File 1c
Supplementary File 1c: Table showing the Two-way ANOVA statistics for the cell frequencies identified through (a) scRNA seq analyses for general clustering using treatment and cell types as independent variable and (b) flow cytometric analyses using treatment and sex as independent variable
	Interaction					Treatment (Row Factor)					Cell Types (Column Factor)
	(a) scRNA seq Cell frequency data
Clustering/Cell type	SS	dF	MS	F	p-value	SS	dF	MS	F	p-value	SS	dF	MS	F	p-value
General	246.5	16	15.41	1.425	0.2078	0.0505	4	0.01262	0.001168	>0.9999	10314	4	2578	238.5	<0.0001
	(b) Flow Cytomentric analyses
	Interaction					Treatment (Row Factor)					Sex (Column Factor)
Cell Type	SS	dF	MS	F	Sig	SS	dF	MS	F	Sig	SS	dF	MS	F	Sig
Macrophage	25.48	4	6.369	0.4	0.7713	96.21	4	24.05	1.6	0.1898	17.4	1	17.4	1.2	0.2808
Neutrophil	28.82	4	7.204	0.8	0.5365	120.9	4	30.23	3.3	0.0289	115	1	115	12	0.0019
Eosinophil	17.82	4	4.454	1.3	0.2853	176.6	4	44.16	13	<0.0001	10.48	1	10.48	3.1	0.0896
CD4 + T-cell	14.19	4	3.547	1	0.4035	81.08	4	20.27	6	0.0023	13.62	1	13.62	4	0.0576
CD8 T-cell	2.817	4	0.7043	2.2	0.1031	19.8	4	4.949	15	<0.0001	0.3256	1	0.3256	1	0.3228

## Sheet: File 1d
Supplementary File 1d : (a) DESeq2 results showing the significant (p<0.05) DEGs and (b) GO results of the DEGs in the myeloid cell cluster from mouse lungs exposed to 5-day nose-only exposure to PG:VG when compared to air control.
(a) DESeq2 Results
	baseMean	log2FoldChange	lfcSE	stat	pvalue	padj
Gsta3	47.3581	1.44815	0.440613	3.28667	0.00101379	0.0487646
Hs6st1	1045.64	0.757034	0.225294	3.3602	0.000778863	0.0406789
Il1rl1	170.076	0.818205	0.243266	3.36341	0.000769856	0.0403779
Slc40a1	691.384	-0.937431	0.278173	-3.36995	0.000751819	0.0397532
Cavin2	574.955	-1.11833	0.210626	-5.30956	1.09892667402846e-07	4.20748391933411e-05
Igfbp5	36.0481	-4.18176	0.948466	-4.40897	1.038615490523e-05	0.00158216
Cxcr2	2632.27	-1.14169	0.266634	-4.28188	1.85322187176898e-05	0.00223715
Cyp27a1	256.063	0.785289	0.235364	3.3365	0.000848419	0.0430808
Des	33.8376	-1.93507	0.558528	-3.46459	0.000531049	0.0310288
Ackr3	137.907	-1.48859	0.340422	-4.37277	1.22681069380843e-05	0.00170633
Tmcc2	202.973	-0.956522	0.291586	-3.28041	0.00103657	0.0487646
Sox13	111.965	-1.04504	0.317211	-3.29447	0.000986068	0.0476701
Hmcn1	345.146	-0.903516	0.220074	-4.10552	4.03410591335396e-05	0.00429136
Fmo1	348.844	-1.25257	0.201772	-6.20787	5.3707669782358e-10	9.81776203621505e-07
Selp	118.611	-1.44664	0.38683	-3.73973	0.000184217	0.0137049
Slamf9	880.676	0.504731	0.146064	3.45556	0.000549154	0.0315111
Cenpf	225.479	0.964581	0.222653	4.33222	1.47610801899056e-05	0.00196753
Ptpn14	50.5923	-1.79681	0.439874	-4.08482	4.41116914010226e-05	0.00452063
Plxdc2	1511.66	0.417427	0.123275	3.38615	0.000708807	0.0379494
Egfl7	1080.45	-0.833681	0.189771	-4.39309	1.11750248109577e-05	0.00166274
Eng	731.047	-1.07847	0.201969	-5.3398	9.30489103523237e-08	3.96884618956111e-05
Dab2ip	97.0148	-1.44821	0.336562	-4.30296	1.68532129234604e-05	0.00207359
Slc43a3	405.755	-1.01864	0.255185	-3.99176	6.55837627980854e-05	0.00603748
Tspan18	219.157	-1.47418	0.314308	-4.69025	2.72874358436201e-06	0.000521149
Actc1	68.2933	-2.94381	0.681496	-4.31963	1.56289005995824e-05	0.00199257
Meis2	126.183	-1.77011	0.385894	-4.58705	4.49550281556638e-06	0.000821778
Frmd5	456.129	1.4685	0.329956	4.45058	8.56384503527872e-06	0.00136979
Il1b	15842	-0.878266	0.235917	-3.72277	0.000197049	0.0143263
1700026D11Rik	105.751	-1.25934	0.376922	-3.34111	0.000834449	0.0426513
Thbd	944.093	-0.788608	0.199309	-3.9567	7.59924027674377e-05	0.00684788
Cd93	950.99	-0.958509	0.137829	-6.95436	3.5417842633623e-12	9.0641342867968e-09
Id1	1396.65	-0.880251	0.15511	-5.67501	1.38683766429782e-08	8.15726666353563e-06
Ccm2l	94.1144	-1.28867	0.352419	-3.65664	0.000255539	0.0171325
Ppp1r16b	330.592	-0.788291	0.201803	-3.90624	9.37446460680813e-05	0.00773907
Mafb	785.361	0.858733	0.166124	5.16923	2.35062937827678e-07	7.33625695717798e-05
Zfp831	280.662	-0.737586	0.223908	-3.29414	0.000987228	0.0476701
Lama5	75.7746	-1.23762	0.359838	-3.43939	0.000583023	0.032801
Sox18	145.429	-1.83888	0.479121	-3.83803	0.000124025	0.00985726
Stmn2	205.063	-1.02123	0.233045	-4.38211	1.17536648001147e-05	0.00166792
Hey1	59.9499	-2.06827	0.541458	-3.81982	0.00013355	0.0104841
Tnfsf10	86.7424	-1.18758	0.344185	-3.45041	0.000559742	0.0318331
Tm4sf1	331.237	-1.08675	0.237288	-4.57987	4.65264797539557e-06	0.000838525
Fcrls	199.702	1.12471	0.306398	3.67075	0.000241837	0.0165484
She	105.527	-1.21202	0.301062	-4.02581	5.67791651853165e-05	0.00558262
S100a16	196.64	-1.12575	0.234272	-4.8053	1.5451930465732e-06	0.000353077
Zfp697	51.4009	-1.41482	0.416376	-3.39795	0.00067892	0.036656
Csf1	518.215	-0.606215	0.181216	-3.34527	0.000822029	0.0422437
S1pr1	520.034	-0.701568	0.212448	-3.30231	0.000958919	0.0475594
Cnn3	181.929	-0.880191	0.250872	-3.50853	0.00045059	0.0275873
Arhgap29	231.569	-1.3337	0.296082	-4.50448	6.65365230161881e-06	0.00112026
Cenpe	197.294	0.799175	0.238782	3.34688	0.000817273	0.0422337
Emcn	140.206	-0.960796	0.292645	-3.28315	0.00102656	0.0487646
Ttll7	96.0381	-1.45212	0.367586	-3.95044	7.80088986464648e-05	0.00692559
Adgrl4	549.834	-1.31685	0.279884	-4.70499	2.53884567705684e-06	0.000499801
Negr1	180.943	2.10902	0.358569	5.88179	4.05857182665625e-09	3.52174231821103e-06
Pakap.1	668.752	-1.25114	0.21652	-5.77842	7.54033488370775e-09	5.36034028732913e-06
Nfib	499.993	-1.03326	0.200408	-5.15576	2.52597756258918e-07	7.64435564093465e-05
Acer2	419.537	-1.06769	0.181641	-5.878	4.15253477240658e-09	3.52174231821103e-06
Tek	432.35	-1.31241	0.270263	-4.85606	1.19745246004674e-06	0.000283752
Stil	90.4678	1.06926	0.30507	3.50497	0.000456655	0.0278255
Tie1	218.559	-1.05826	0.245046	-4.31862	1.57004321803817e-05	0.00199257
Gja4	39.6289	-2.19156	0.594569	-3.68596	0.000227845	0.0158451
C1qb	2889.04	0.994761	0.213187	4.66615	3.0690041561022e-06	0.000577514
C1qc	1805.45	0.978725	0.237656	4.11825	3.8176626944884e-05	0.00413815
C1qa	3136.39	1.06007	0.216847	4.88856	1.01577895261075e-06	0.00024996
Ece1	587.537	-0.820166	0.161291	-5.08501	3.67616113612513e-07	0.000102261
Sema3c	706.859	-0.927	0.193192	-4.79835	1.59980871751161e-06	0.000359143
Fgl2	2013.87	-0.667383	0.176533	-3.78051	0.000156507	0.011992
Nos3	48.679	-1.7243	0.510008	-3.38094	0.000722394	0.0385157
Nsg1	128.986	-1.30835	0.308384	-4.2426	2.20949781177017e-05	0.00259383
Adgra3	66.9789	-1.22613	0.363759	-3.37073	0.000749685	0.0397532
Slc34a2	69.0051	-1.58133	0.415651	-3.80446	0.000142116	0.0110885
Kit	259.178	-1.00989	0.250951	-4.02427	5.71524944494531e-05	0.00558262
Cxcl15	63.057	-2.05839	0.500048	-4.1164	3.84838714151486e-05	0.00413815
Areg	51.0702	2.55211	0.536935	4.7531	2.00322184320988e-06	0.000420217
Cxcl10	51.8144	-2.08935	0.609741	-3.42661	0.00061116	0.0337086
Cit	152.232	0.807393	0.244108	3.30753	0.000941239	0.0468642
Tbx3	194.822	-1.34392	0.361749	-3.71507	0.000203146	0.0146037
Myl2	73.0133	-1.63504	0.489475	-3.34038	0.000836627	0.0426513
Gm43661	492.162	-0.995289	0.253137	-3.93182	8.43061704190989e-05	0.00719431
Pitpnm2	126.617	-1.11277	0.334844	-3.32324	0.000889799	0.0446505
Eln	226.134	-1.6604	0.392516	-4.23016	2.33524757146204e-05	0.00266802
Rasa4	222.762	0.916612	0.267763	3.42323	0.000618827	0.033985
Ephb4	122.075	-1.74383	0.338437	-5.15261	2.56882848202712e-07	7.64435564093465e-05
Cav2	706.788	-0.573492	0.142693	-4.01905	5.84323806613034e-05	0.00562181
Cav1	805.131	-0.909874	0.217727	-4.17896	2.92841440532083e-05	0.00328702
Cadps2	114.441	-1.19927	0.363446	-3.29972	0.000967806	0.0476087
Podxl	321.301	-1.36637	0.26898	-5.07982	3.77800015387486e-07	0.000102858
Bpgm	170.388	1.8409	0.292874	6.28562	3.26538643267345e-10	6.96398079874825e-07
Gimap4	124.879	-1.11571	0.310364	-3.59484	0.000324596	0.0213001
Tmem176b	1464.37	0.735845	0.128438	5.72918	1.00914320941035e-08	6.45649825380739e-06
Tmem176a	1190.92	0.641759	0.146205	4.38944	1.13643125777654e-05	0.00166792
Gsdme	472.206	-0.718313	0.203806	-3.5245	0.000424286	0.0262278
Inmt	276.167	0.994409	0.287173	3.46275	0.000534694	0.0310997
Aqp1	912.089	-1.07621	0.19258	-5.58836	2.2921768348194e-08	1.13794842260613e-05
Snca	37.7785	6.61443	1.7685	3.74013	0.000183923	0.0137049
Igkc	632.85	-1.05546	0.247989	-4.25609	2.08030352936162e-05	0.00248781
Reep1	45.804	-1.44277	0.441244	-3.26977	0.00107635	0.0499023
Asprv1	754.263	-1.30423	0.290923	-4.48309	7.35715535722632e-06	0.00119167
Mxd1	4680.98	-0.968819	0.250769	-3.8634	0.00011182	0.00911372
Gata2	297.618	-1.04265	0.199802	-5.21842	1.80452421402601e-07	6.076497853336e-05
Fgd5	165.587	-1.36184	0.389295	-3.49822	0.000468377	0.0284045
Prickle2	1035.17	-0.826134	0.252125	-3.27668	0.00105036	0.0492321
Cxcl12	181.328	-1.08902	0.269164	-4.04592	5.21187144163851e-05	0.00524853
Gm16556	561.884	-0.823587	0.220328	-3.738	0.000185492	0.0137069
Vwf	769.495	-0.630157	0.189415	-3.32687	0.000878289	0.0443678
Tspan9	309.319	-0.900932	0.251453	-3.58291	0.000339787	0.0221833
2310001H17Rik	1213.87	-0.61925	0.186179	-3.3261	0.000880698	0.0443678
Clec1a	651.346	-0.984158	0.281946	-3.49059	0.00048196	0.0289538
Pde3a	412.711	-1.07839	0.245866	-4.38609	1.1540829469264e-05	0.00166792
Tmtc1	153.366	-1.20574	0.298303	-4.042	5.29976107446927e-05	0.00525703
Nlrp12	666.143	-0.889732	0.226295	-3.93174	8.43346491632061e-05	0.00719431
Apoe	14261.6	0.752413	0.174755	4.30552	1.66591910795035e-05	0.00206962
Bcam	197.773	-0.945964	0.264793	-3.57247	0.000353628	0.0227389
Pou2f2	1868.34	0.766339	0.206718	3.70718	0.000209582	0.0149822
Prx	343.73	-0.927327	0.208685	-4.44367	8.84358949029671e-06	0.00139707
Rasip1	522.384	-0.947209	0.182891	-5.17909	2.22970028418787e-07	7.23785946004019e-05
Tjp1	245.476	-1.5797	0.278829	-5.66547	1.46621704643107e-08	8.15726666353563e-06
Prss23	143.332	-2.50997	0.415897	-6.03507	1.58894156023569e-09	1.69434135039799e-06
Serpinh1	122.657	-1.08318	0.27648	-3.91774	8.9381468185001e-05	0.00752451
Hbb-bt	3801.24	11.3729	1.86101	6.11115	9.89133950496338e-10	1.26569580305511e-06
Hbb-bs	14667.4	9.17736	1.8566	4.9431	7.68904498407204e-07	0.000193575
Trim30b	599.12	-0.85819	0.255157	-3.36338	0.000769945	0.0403779
Lyve1	871.998	-1.11249	0.278151	-3.99959	6.34513046283435e-05	0.00595299
Galnt18	443.447	-1.07488	0.2619	-4.10416	4.05794517001938e-05	0.00429136
Mki67	693.467	0.810339	0.210428	3.8509	0.000117682	0.00947085
Retn	204.33	-1.3532	0.305955	-4.42287	9.7397569212118e-06	0.00150157
Efnb2	323.69	-1.1597	0.242868	-4.77501	1.79698464444489e-06	0.000396452
Col4a1	387.279	-0.738818	0.18883	-3.91261	9.13028591982736e-05	0.00758644
1700029H14Rik	149.727	-1.01876	0.271796	-3.74828	0.000178054	0.0134023
Csmd1	36.0432	3.65038	0.882658	4.13566	3.53934512021888e-05	0.00390426
Plat	130.115	-1.54327	0.374661	-4.11911	3.80331462967202e-05	0.00413815
Dlc1	336.143	-1.15092	0.244501	-4.70723	2.51110106636067e-06	0.000499801
Mtus1	619.79	-0.940353	0.255847	-3.67545	0.000237429	0.0163341
Neil3	127.825	1.19406	0.315569	3.78383	0.000154431	0.0119042
Plvap	453.022	-1.1504	0.256256	-4.48926	7.14711928808669e-06	0.00117249
Nkd1	218.969	-0.967266	0.250781	-3.85702	0.000114778	0.00929557
Slc6a2	89.4907	-2.14271	0.543046	-3.94572	7.95609458483915e-05	0.00692559
Cdh5	883.474	-0.98375	0.174105	-5.65033	1.60137224645931e-08	8.5379830273722e-06
Cdh13	27.6553	-2.90568	0.868042	-3.34739	0.000815757	0.0422337
Fendrr	444.156	-0.783959	0.210698	-3.72078	0.000198612	0.0143584
Pard3	148.215	-1.31592	0.310752	-4.23463	2.28929247711571e-05	0.00263908
Amotl1	117.064	-1.37285	0.385185	-3.56412	0.000365083	0.023358
Esam	394.052	-0.835992	0.177989	-4.69688	2.64162733025391e-06	0.000512156
Smad6	453.177	-1.03188	0.226046	-4.56492	4.99681758297392e-06	0.000875881
Aqp9	525.77	-1.07132	0.266765	-4.01595	5.92059516776496e-05	0.00565373
Myzap	280.053	-1.40534	0.237778	-5.9103	3.41478189486202e-09	3.36119608666573e-06
Amotl2	101.936	-1.6108	0.398298	-4.0442	5.25016907444356e-05	0.00524853
Slco2a1	598.601	-1.1048	0.207524	-5.32372	1.01663740625813e-07	4.19641685499324e-05
Sema3f	201.349	-1.08329	0.310794	-3.48554	0.000491142	0.0290956
Kif15	193.389	1.09739	0.278642	3.93835	8.20429703172753e-05	0.00709339
Myct1	86.8586	-1.61967	0.437821	-3.69939	0.000216116	0.0151116
Ptprk	243.354	-1.25823	0.315112	-3.99297	6.52510130092642e-05	0.00603748
Man1a	1387.9	0.778521	0.171591	4.53706	5.70433019039862e-06	0.000973235
Chst11	2333.03	-0.913988	0.248238	-3.6819	0.000231498	0.0160122
Timp3	993.99	-1.26266	0.237821	-5.30931	1.1004199902534e-07	4.20748391933411e-05
Gm47719	218.972	-1.13065	0.328956	-3.43707	0.000588049	0.032801
Kitl	360.89	-1.25568	0.266689	-4.70842	2.49647490634263e-06	0.000499801
Ptprb	1342.15	-1.55407	0.206779	-7.51561	5.66464789100529e-14	2.41616114711012e-10
4930554G24Rik	112.761	-1.66158	0.352047	-4.71976	2.36118967441606e-06	0.000487319
B3gnt2	937.833	-0.488364	0.145935	-3.34645	0.000818534	0.0422337
Ccdc85a	295.258	-1.25623	0.274749	-4.57228	4.82452038751728e-06	0.000857424
Sptbn1	2644.54	-0.608284	0.152127	-3.99854	6.37354849343079e-05	0.00595299
Hba-a1	5476.75	9.63797	1.69912	5.67232	1.40873903248108e-08	8.15726666353563e-06
Hba-a2	4437.1	9.65408	1.66657	5.79279	6.9225083349243e-09	5.21061274433479e-06
Epn2	78.9984	-1.33331	0.406151	-3.2828	0.00102782	0.0487646
Ntn1	101.582	-1.3571	0.371844	-3.64965	0.000262598	0.0175011
Arhgef15	119.537	-1.40041	0.344069	-4.07014	4.69854295461766e-05	0.00477163
Adap2	677.288	0.568082	0.154859	3.66839	0.000244086	0.0166134
Unc45b	80.9898	-1.28584	0.356067	-3.61123	0.000304744	0.0202047
Tmem100	1095.03	-1.18454	0.236195	-5.01512	5.30012778687783e-07	0.000138409
Tbx21	26.5615	-2.36964	0.683228	-3.4683	0.000523761	0.0307433
Top2a	739.437	0.910223	0.191146	4.76192	1.91757997285763e-06	0.000415887
Cavin1	276.336	-1.26709	0.247377	-5.12209	3.02161874030921e-07	8.7874166820447e-05
Ramp2	1220.29	-0.831611	0.207236	-4.01287	5.99842814615319e-05	0.00568562
Arl4d	199.715	-0.976147	0.242789	-4.02056	5.80592334692764e-05	0.00562181
Hexim1	1143.49	-0.533611	0.163096	-3.27176	0.00106882	0.0497331
Mapt	237.95	-0.970695	0.262321	-3.70041	0.000215248	0.0151116
Pecam1	1141.95	-0.649978	0.167997	-3.86899	0.000109288	0.00896441
Caskin2	132.031	-1.63604	0.411256	-3.97816	6.94499315079967e-05	0.0063027
Rnf144a	924.526	-1.19901	0.277661	-4.31824	1.57275251861538e-05	0.00199257
Dnajb9	1241.67	-0.68815	0.197098	-3.49141	0.000480474	0.0289538
Egln3	169.8	-1.72127	0.348264	-4.94244	7.7151712265457e-07	0.000193575
Clec14a	306.782	-1.47575	0.344039	-4.28949	1.79081025541401e-05	0.0021824
Rhoj	297.083	-1.51278	0.215846	-7.00858	2.40748657694659e-12	7.70154955965213e-09
Cep128	864.884	0.538963	0.164296	3.28044	0.00103646	0.0487646
Efcab11	236.516	1.21426	0.234577	5.17636	2.26253812442644e-07	7.23785946004019e-05
Lgmn	2132.8	0.485033	0.118748	4.08456	4.41605707570132e-05	0.00452063
Eml1	201.95	-0.945711	0.253081	-3.73679	0.000186387	0.0137069
Rcor1	1548.77	-0.455528	0.131783	-3.45665	0.000546943	0.0315111
Crip2	651.239	-0.851997	0.215826	-3.94761	7.89346922034314e-05	0.00692559
Nid1	62.1471	-1.41082	0.407897	-3.45877	0.00054265	0.0314197
Gng4	150.689	-1.1954	0.326007	-3.66679	0.000245614	0.016629
Hist1h2ap	319.699	1.01538	0.229437	4.42552	9.62092399941967e-06	0.00150133
Hist1h2bc	1682.45	-0.650278	0.190333	-3.41653	0.000634243	0.0345486
Hfe	645.343	0.627684	0.178762	3.51129	0.000445938	0.0274338
Ripor2	4292.03	-0.717307	0.175409	-4.08933	4.32613582039317e-05	0.00452063
Armh2	49.8047	-2.68582	0.756593	-3.54989	0.00038539	0.0244131
Serpinb6b	90.451	-1.82967	0.48595	-3.76513	0.000166461	0.0126788
Bmp6	297.361	-1.64632	0.313522	-5.25107	1.51218015778582e-07	5.32361489456786e-05
Gcnt2	4959.26	-0.671272	0.179018	-3.74974	0.000177018	0.0134023
Edn1	159.573	-1.91226	0.450476	-4.24499	2.18606894138756e-05	0.00259009
Cd83	1276.07	0.608373	0.172014	3.53676	0.000405068	0.0252842
Ctla2a	1975.1	-0.775253	0.1397	-5.54942	2.86615817215244e-08	1.3583466655875e-05
Homer1	2302.04	-0.76443	0.209063	-3.65645	0.000255729	0.0171325
Hexb	2138.4	0.448365	0.124238	3.60891	0.000307491	0.0202817
Plpp1	907.381	-0.657297	0.158904	-4.13646	3.5271050490322e-05	0.00390426
Ptprg	693.555	-1.2107	0.230201	-5.25932	1.44588988910254e-07	5.28617343455887e-05
Sema3g	180.206	-1.2184	0.279314	-4.3621	1.2881796621104e-05	0.00177242
Mmrn2	58.692	-1.53583	0.440341	-3.48783	0.000486962	0.0289822
Sftpa1	336.794	-1.14	0.233501	-4.88218	1.04918219917885e-06	0.000253308
Fermt2	345.633	-1.00496	0.221171	-4.5438	5.52482049304127e-06	0.000955346
Sox7	108.331	-1.91117	0.511791	-3.73428	0.000188255	0.0137652
Sftpc	2397.85	-1.49013	0.39214	-3.79999	0.000144702	0.0112219
Pcdh17	189.013	-1.14715	0.280599	-4.08822	4.34687124633721e-05	0.00452063
Diaph3	439.159	0.807261	0.186873	4.31983	1.56147995739758e-05	0.00199257
Klf12	91.1758	-1.19347	0.346744	-3.44193	0.00057758	0.0327023
Dock9	542.24	-1.1817	0.22518	-5.24779	1.53933847373406e-07	5.32361489456786e-05
Ghr	224.451	-1.83229	0.36414	-5.03181	4.85858509554159e-07	0.000129522
Npr3	296.352	-1.19404	0.302544	-3.94668	7.92412746536804e-05	0.00692559
Fbxl7	183.657	-1.46835	0.269683	-5.44473	5.18836168122258e-08	2.28931986458359e-05
Ly6a	1119.72	-0.890395	0.258999	-3.43782	0.000586409	0.032801
Ly6c1	708.99	-1.0663	0.272476	-3.91336	9.10215497532727e-05	0.00758644
Gpihbp1	708.2	-0.686335	0.18538	-3.70231	0.000213645	0.0151116
Mirt2	469.779	-1.22051	0.318881	-3.82748	0.000129465	0.0102261
Spatc1	239.387	-1.15539	0.350248	-3.29878	0.000971075	0.0476087
Cdc42ep1	113.656	-1.23116	0.319966	-3.8478	0.000119185	0.00953181
Shank3	263.246	-0.919227	0.210977	-4.35701	1.31853853982636e-05	0.001776
Hdac7	226.125	-0.919548	0.248465	-3.70092	0.000214819	0.0151116
Acvrl1	1022.23	-0.570688	0.17387	-3.28227	0.00102974	0.0487646
Tns2	137.003	-1.05423	0.310622	-3.39393	0.000688967	0.0370421
Myh11	75.4122	-2.67449	0.620626	-4.30934	1.63739458491734e-05	0.00205413
Ppm1f	140.519	-0.914695	0.263142	-3.47605	0.00050885	0.0300057
Iglc2	105.119	-1.47028	0.446327	-3.29418	0.0009871	0.0476701
Phldb2	166.345	-1.07701	0.245886	-4.38012	1.18615879348771e-05	0.00166792
Jam2	55.7445	-1.41475	0.401256	-3.5258	0.000422212	0.0262263
Cyyr1	606.855	-1.53465	0.253518	-6.05342	1.41806745506112e-09	1.64959919590565e-06
Erg	202.015	-1.23917	0.242717	-5.10541	3.30070774039182e-07	9.38574583245638e-05
Slc9a3r2	649.758	-1.43422	0.310875	-4.61348	3.95973183208387e-06	0.000734329
Tmem204	142.414	-1.11557	0.311705	-3.57893	0.000345007	0.0224097
H2-Aa	17168	0.545061	0.159541	3.41643	0.000634489	0.0345486
H2-Eb1	16082.7	0.500772	0.145727	3.43636	0.000589576	0.032801
Aif1	691.298	0.850547	0.21343	3.98514	6.7440143680638e-05	0.00616403
H2-Q10	1024.11	-0.850353	0.215047	-3.95426	7.67712605976144e-05	0.00686969
AY036118	1156.66	-0.450118	0.132048	-3.40874	0.000652647	0.0353867
Adgrf5	1139.96	-1.17559	0.153428	-7.66214	1.82864583083825e-14	1.16996760257031e-10
Clic5	389.329	-1.49904	0.260452	-5.75551	8.6381390998803e-09	5.81755936431939e-06
Vegfa	356.354	-1.04431	0.265853	-3.92813	8.5607403102185e-05	0.00725452
Ptprm	574.16	-0.918338	0.209624	-4.38088	1.18198550978853e-05	0.00166792
Ltbp1	84.6986	-2.04637	0.430474	-4.75376	1.99664406534704e-06	0.000420217
Rasgrp3	187.316	-0.884122	0.257654	-3.43143	0.000600404	0.0332587
Epas1	2294.2	-1.38287	0.175236	-7.89148	2.98635141868599e-15	3.8213352753506e-11
Ston1	176.214	-0.788621	0.239143	-3.2977	0.000974807	0.0476093
Jcad	257.32	-1.57798	0.2689	-5.86827	4.40355400839141e-09	3.52174231821103e-06
Gm49980	179.061	0.996487	0.285668	3.48827	0.000486163	0.0289822
Arap3	593.821	-0.820617	0.182567	-4.49488	6.96106300493202e-06	0.0011568
Scgb3a2	148.457	4.97155	1.50605	3.30104	0.000963267	0.0475906
Sema6a	306.452	-1.19312	0.28504	-4.18581	2.84146332722427e-05	0.00321764
Gm15345	464.82	-2.08864	0.5894	-3.54367	0.0003946	0.0247515
Iigp1	58.5137	-2.1039	0.482785	-4.35785	1.31349101026364e-05	0.001776
Ndst1	526.119	-1.05532	0.217996	-4.84102	1.29171384390965e-06	0.000300523
Cd74	53578.3	0.539971	0.162892	3.3149	0.000916743	0.0458228
Tcof1	874.113	0.486616	0.136709	3.55949	0.00037157	0.0236548
Csf1r	2751.98	0.559001	0.157652	3.5458	0.00039143	0.0246736
Afap1l1	336.987	-1.21808	0.198162	-6.14691	7.90081348376863e-10	1.12332010375893e-06
Sh3tc2	52.5689	-2.08328	0.481761	-4.3243	1.53019244064514e-05	0.00199257
Gstp1	376.726	0.776861	0.237238	3.2746	0.0010581	0.049414
Ms4a7	294.441	1.43684	0.233727	6.14752	7.87015639957794e-10	1.12332010375893e-06
Aldh1a1	96.2713	1.76019	0.321364	5.47723	4.32035320491861e-08	1.97440141464781e-05
Cemip2	707.387	-0.760487	0.179579	-4.23483	2.28729534856007e-05	0.00263908
Fas	724.219	-0.612065	0.186289	-3.28557	0.00101776	0.0487646
Cc2d2b	216.063	-1.28131	0.358663	-3.57247	0.000353629	0.0227389
Scd1	241.856	-1.10447	0.250985	-4.40054	1.07981236917272e-05	0.00162556
Tspan7	895.94	-1.02237	0.192667	-5.30642	1.1179622792854e-07	4.20748391933411e-05
Efnb1	258.811	-1.4075	0.25193	-5.58686	2.31218028975925e-08	1.13794842260613e-05
Kif4	104.257	0.985028	0.285414	3.45122	0.000558054	0.0318331
(b) GO analyses
	ONTOLOGY	ID	Description	GeneRatio	BgRatio	pvalue	p.adjust	qvalue	geneID	Count
GO:0001667	BP	GO:0001667	ameboidal-type cell migration	34/256	469/23012	4.08140024960092e-18	1.50073087177826e-14	1.04913467468689e-14	Edn1/Ppm1f/Ptprm/Sema3f/Rhoj/Amotl1/Jcad/Hdac7/Kit/Cdh13/Aqp1/Sema3g/Efnb1/Vegfa/Sema6a/Tek/Mmrn2/Sema3c/Efnb2/Lgmn/Amotl2/Clec14a/Cdh5/Ptprg/Nos3/Cxcl12/Acvrl1/Kitl/Dab2ip/Gata2/Ephb4/Apoe/Lama5/Pecam1	34
GO:0010631	BP	GO:0010631	epithelial cell migration	26/256	327/23012	4.98060294975941e-15	6.11710459348188e-12	4.27636071090069e-12	Ppm1f/Ptprm/Rhoj/Amotl1/Jcad/Hdac7/Kit/Cdh13/Aqp1/Vegfa/Tek/Mmrn2/Efnb2/Lgmn/Clec14a/Cdh5/Ptprg/Nos3/Cxcl12/Acvrl1/Kitl/Dab2ip/Gata2/Ephb4/Apoe/Pecam1	26
GO:0090132	BP	GO:0090132	epithelium migration	26/256	329/23012	5.76000869697465e-15	6.11710459348188e-12	4.27636071090069e-12	Ppm1f/Ptprm/Rhoj/Amotl1/Jcad/Hdac7/Kit/Cdh13/Aqp1/Vegfa/Tek/Mmrn2/Efnb2/Lgmn/Clec14a/Cdh5/Ptprg/Nos3/Cxcl12/Acvrl1/Kitl/Dab2ip/Gata2/Ephb4/Apoe/Pecam1	26
GO:0090130	BP	GO:0090130	tissue migration	26/256	331/23012	6.65445155668412e-15	6.11710459348188e-12	4.27636071090069e-12	Ppm1f/Ptprm/Rhoj/Amotl1/Jcad/Hdac7/Kit/Cdh13/Aqp1/Vegfa/Tek/Mmrn2/Efnb2/Lgmn/Clec14a/Cdh5/Ptprg/Nos3/Cxcl12/Acvrl1/Kitl/Dab2ip/Gata2/Ephb4/Apoe/Pecam1	26
GO:0050920	BP	GO:0050920	regulation of chemotaxis	22/256	240/23012	3.74653809493587e-14	2.75520411501584e-11	1.92611495322808e-11	Edn1/Ppm1f/Ripor2/Sema3f/Cdh13/Sema3g/Gstp1/Cd74/Vegfa/Sema6a/Csf1r/Sema3c/Efnb2/Lgmn/Mtus1/Cxcl12/Aif1/S1pr1/Cxcl10/Csf1/Cxcr2/Il1b	22
GO:0002040	BP	GO:0002040	sprouting angiogenesis	17/256	132/23012	1.23586959520962e-13	7.57382083597631e-11	5.29472552895071e-11	Tjp1/Rhoj/Jcad/Hdac7/Cdh13/Epn2/Vegfa/Sema6a/Ramp2/Tek/Mmrn2/Efnb2/Clec14a/Tspan18/Gata2/Ephb4/Ppp1r16b	17
GO:0043542	BP	GO:0043542	endothelial cell migration	21/256	231/23012	1.7147086450578e-13	9.00711955411076e-11	6.29671956576113e-11	Ptprm/Rhoj/Amotl1/Jcad/Hdac7/Cdh13/Vegfa/Tek/Mmrn2/Efnb2/Lgmn/Clec14a/Cdh5/Nos3/Cxcl12/Acvrl1/Dab2ip/Gata2/Ephb4/Apoe/Pecam1	21
GO:0006935	BP	GO:0006935	chemotaxis	28/256	455/23012	2.59112301347692e-13	1.16943284396216e-10	8.17530024463765e-11	Edn1/Ppm1f/Ripor2/Sema3f/Kit/Cdh13/Sema3g/Gstp1/Cd74/Vegfa/Sema6a/Csf1r/Sema3c/Efnb2/Lgmn/Ackr3/Ntn1/Mtus1/Cxcl12/Cxcl15/Aif1/S1pr1/Cxcl10/Csf1/Slamf9/Cxcr2/Eng/Il1b	28
GO:0042330	BP	GO:0042330	taxis	28/256	457/23012	2.88406445072342e-13	1.16943284396216e-10	8.17530024463765e-11	Edn1/Ppm1f/Ripor2/Sema3f/Kit/Cdh13/Sema3g/Gstp1/Cd74/Vegfa/Sema6a/Csf1r/Sema3c/Efnb2/Lgmn/Ackr3/Ntn1/Mtus1/Cxcl12/Cxcl15/Aif1/S1pr1/Cxcl10/Csf1/Slamf9/Cxcr2/Eng/Il1b	28
GO:0040013	BP	GO:0040013	negative regulation of locomotion	25/256	359/23012	3.44705959933782e-13	1.16943284396216e-10	8.17530024463765e-11	Fas/Phldb2/Ripor2/Ptprk/Ptprm/Sema3f/Cav1/Sema3g/Gstp1/Cd74/Sema6a/Mmrn2/Sema3c/Tie1/Frmd5/Ptprg/Dlc1/Cxcl12/Acvrl1/Aif1/Igfbp5/Dab2ip/Egfl7/Apoe/Eng	25
GO:0050900	BP	GO:0050900	leukocyte migration	26/256	392/23012	3.49843929387647e-13	1.16943284396216e-10	8.17530024463765e-11	Edn1/Ripor2/Nlrp12/Kit/Lyve1/Cd74/Vegfa/Csf1r/Lgmn/Jam2/Mtus1/Podxl/Plvap/Cxcl12/Cxcl15/Aif1/S1pr1/Cxcl10/Kitl/Csf1/Slamf9/Selp/Tbx21/Cxcr2/Pecam1/Il1b	26
GO:0045765	BP	GO:0045765	regulation of angiogenesis	23/256	307/23012	6.97978778502521e-13	2.13872330712814e-10	1.49514401500277e-10	Id1/Ptprm/Tjp1/Rhoj/Jcad/Aqp1/Epn2/Vegfa/Sema6a/Ramp2/Tek/Tie1/Cdh5/Nos3/Acvrl1/Tspan18/Cxcl10/Cxcr2/Dab2ip/Gata2/Ppp1r16b/Eng/Il1b	23
GO:0002687	BP	GO:0002687	positive regulation of leukocyte migration	18/256	172/23012	8.78419461776786e-13	2.24039789551641e-10	1.56622293942461e-10	Edn1/Ripor2/Lyve1/Cd74/Vegfa/Csf1r/Lgmn/Jam2/Plvap/Cxcl12/Aif1/Cxcl10/Kitl/Csf1/Selp/Cxcr2/Pecam1/Il1b	18
GO:0034329	BP	GO:0034329	cell junction assembly	28/256	479/23012	9.0322860214409e-13	2.24039789551641e-10	1.56622293942461e-10	Ppm1f/Ston1/Phldb2/Ptprk/Tjp1/Negr1/Shank3/Esam/Cav1/Hdac7/Cdh13/Efnb1/Pcdh17/Vegfa/Ramp2/Tek/Efnb2/Fermt2/Snca/Cdh5/Pard3/Dlc1/Ntn1/Arhgef15/Acvrl1/Mapt/Pecam1/Il1b	28
GO:1901342	BP	GO:1901342	regulation of vasculature development	23/256	311/23012	9.13950732465219e-13	2.24039789551641e-10	1.56622293942461e-10	Id1/Ptprm/Tjp1/Rhoj/Jcad/Aqp1/Epn2/Vegfa/Sema6a/Ramp2/Tek/Tie1/Cdh5/Nos3/Acvrl1/Tspan18/Cxcl10/Cxcr2/Dab2ip/Gata2/Ppp1r16b/Eng/Il1b	23
GO:0060485	BP	GO:0060485	mesenchyme development	23/256	315/23012	1.19185502954739e-12	2.73903183977861e-10	1.91480919878601e-10	Edn1/Phldb2/Timp3/Sema3f/Sema3g/Efnb1/Tcof1/Vegfa/Sema6a/Sema3c/Fermt2/Nos3/Gcnt2/Acvrl1/Hey1/Kitl/Fendrr/Tmem100/Dab2ip/Lama5/Eng/Tbx3/Il1b	23
GO:0001936	BP	GO:0001936	regulation of endothelial cell proliferation	17/256	152/23012	1.29326281674366e-12	2.79725139833319e-10	1.955509472748e-10	Ptprm/Bmp6/Cav2/Cav1/Jcad/Cdh13/Vegfa/Tek/Mmrn2/Tie1/Cxcl12/Acvrl1/Gata2/Egfl7/Ppp1r16b/Apoe/Eng	17
GO:0048762	BP	GO:0048762	mesenchymal cell differentiation	20/256	253/23012	8.78606769827183e-12	1.79479838480808e-09	1.25471212392864e-09	Edn1/Phldb2/Timp3/Sema3f/Sema3g/Efnb1/Tcof1/Vegfa/Sema6a/Sema3c/Fermt2/Gcnt2/Hey1/Kitl/Tmem100/Dab2ip/Lama5/Eng/Tbx3/Il1b	20
GO:0043534	BP	GO:0043534	blood vessel endothelial cell migration	15/256	125/23012	1.00082824266382e-11	1.93686602540782e-09	1.35402912386983e-09	Rhoj/Amotl1/Jcad/Hdac7/Vegfa/Mmrn2/Efnb2/Clec14a/Cdh5/Nos3/Cxcl12/Acvrl1/Gata2/Ephb4/Apoe	15
GO:0001935	BP	GO:0001935	endothelial cell proliferation	17/256	174/23012	1.16966157629692e-11	2.15042280802189e-09	1.50332293121952e-09	Ptprm/Bmp6/Cav2/Cav1/Jcad/Cdh13/Vegfa/Tek/Mmrn2/Tie1/Cxcl12/Acvrl1/Gata2/Egfl7/Ppp1r16b/Apoe/Eng	17
GO:0002685	BP	GO:0002685	regulation of leukocyte migration	19/256	245/23012	4.12928422399703e-11	7.06899991709385e-09	4.9418140639661e-09	Edn1/Ripor2/Lyve1/Cd74/Vegfa/Csf1r/Lgmn/Jam2/Mtus1/Plvap/Cxcl12/Aif1/Cxcl10/Kitl/Csf1/Selp/Cxcr2/Pecam1/Il1b	19
GO:0003158	BP	GO:0003158	endothelium development	15/256	138/23012	4.22948050519621e-11	7.06899991709385e-09	4.9418140639661e-09	Id1/Tjp1/Bmp6/Vegfa/Tie1/Sox18/Cdh5/Acvrl1/Cxcl10/Hey1/Slc40a1/Tmem100/Ppp1r16b/Pecam1/Il1b	15
GO:0007162	BP	GO:0007162	negative regulation of cell adhesion	21/256	315/23012	6.52386102329526e-11	1.0429668253329e-08	7.29119845257987e-09	Hfe/Ppm1f/Phldb2/Ripor2/H2-Aa/Ccm2l/Bmp6/Cdh13/Acer2/Gstp1/Cd74/Vegfa/Sema6a/Jam2/Fgl2/Dlc1/Gcnt2/Podxl/Cxcl12/Acvrl1/Tbx21	21
GO:0050678	BP	GO:0050678	regulation of epithelial cell proliferation	24/256	423/23012	7.73084712597841e-11	1.18443020342594e-08	8.28014415861372e-09	Ptprk/Id1/Ptprm/Bmp6/Cav2/Cav1/Jcad/Cdh13/Nfib/Vegfa/Tek/Mmrn2/Tie1/Efnb2/Cxcl12/Acvrl1/Hey1/Dab2ip/Gata2/Egfl7/Ppp1r16b/Apoe/Lama5/Eng	24
GO:0060562	BP	GO:0060562	epithelial tube morphogenesis	23/256	395/23012	1.17225495004512e-10	1.72415258052636e-08	1.20532487916218e-08	Edn1/Shank3/Csmd1/Vegfa/Tek/Mmrn2/Tie1/Efnb2/Col4a1/Dlc1/Ntn1/Cxcl12/Acvrl1/Areg/Cxcl10/Hey1/Csf1/Stil/Cxcr2/Rasip1/Lama5/Eng/Tbx3	23
GO:2000146	BP	GO:2000146	negative regulation of cell motility	21/256	327/23012	1.3037945846999e-10	1.79536355111958e-08	1.25510722180096e-08	Fas/Phldb2/Ripor2/Ptprk/Ptprm/Cav1/Gstp1/Cd74/Mmrn2/Tie1/Frmd5/Ptprg/Dlc1/Cxcl12/Acvrl1/Aif1/Igfbp5/Dab2ip/Egfl7/Apoe/Eng	21
GO:0048872	BP	GO:0048872	homeostasis of number of cells	23/256	398/23012	1.36131471435337e-10	1.79536355111958e-08	1.25510722180096e-08	Fas/Tspan9/Kit/Hba-a1/Hba-a2/Adgrf5/Cd74/Emcn/Vegfa/Csf1r/Myct1/Rcor1/Nos3/Bpgm/Mafb/Epas1/Kitl/Csf1/Slc40a1/Cadps2/Cxcr2/Gata2/Hbb-b1	23
GO:0043114	BP	GO:0043114	regulation of vascular permeability	10/256	49/23012	1.36715201064314e-10	1.79536355111958e-08	1.25510722180096e-08	Tjp1/Bmp6/Vegfa/Ramp2/Fermt2/Cdh5/Pde3a/Plvap/Cxcr2/Apoe	10
GO:0050921	BP	GO:0050921	positive regulation of chemotaxis	15/256	162/23012	4.17172551207575e-10	5.16963226775211e-08	3.61399939820811e-08	Edn1/Ppm1f/Ripor2/Cdh13/Cd74/Vegfa/Csf1r/Lgmn/Cxcl12/Aif1/S1pr1/Cxcl10/Csf1/Cxcr2/Il1b	15
GO:0030336	BP	GO:0030336	negative regulation of cell migration	20/256	314/23012	4.2178125654763e-10	5.16963226775211e-08	3.61399939820811e-08	Fas/Phldb2/Ripor2/Ptprk/Ptprm/Cav1/Gstp1/Cd74/Mmrn2/Tie1/Ptprg/Dlc1/Cxcl12/Acvrl1/Aif1/Igfbp5/Dab2ip/Egfl7/Apoe/Eng	20
GO:1902903	BP	GO:1902903	regulation of supramolecular fiber organization	22/256	394/23012	6.65740021052223e-10	7.89653566906137e-08	5.52032981802896e-08	Edn1/Ppm1f/Phldb2/Id1/Tjp1/Shank3/Esam/Cav1/Sptbn1/Stmn2/Fermt2/Snca/Cdh5/Dlc1/Arhgef15/Cdc42ep1/Mapt/S1pr1/Eln/Cit/Apoe/Pecam1	22
GO:0045446	BP	GO:0045446	endothelial cell differentiation	13/256	119/23012	8.08568571102061e-10	9.04637861792213e-08	6.32416488984608e-08	Id1/Tjp1/Bmp6/Vegfa/Tie1/Sox18/Cdh5/Acvrl1/Hey1/Tmem100/Ppp1r16b/Pecam1/Il1b	13
GO:0060326	BP	GO:0060326	cell chemotaxis	20/256	326/23012	8.11886033155916e-10	9.04637861792213e-08	6.32416488984608e-08	Edn1/Ripor2/Kit/Gstp1/Cd74/Vegfa/Csf1r/Lgmn/Ackr3/Mtus1/Cxcl12/Cxcl15/Aif1/S1pr1/Cxcl10/Csf1/Slamf9/Cxcr2/Eng/Il1b	20
GO:0003007	BP	GO:0003007	heart morphogenesis	19/256	294/23012	9.18739890185091e-10	9.935901694737e-08	6.94601489731267e-08	Edn1/Ccm2l/Vegfa/Tek/Sema3c/Nos3/Dlc1/Acvrl1/S1pr1/Hey1/Stil/Eln/Tmem100/Smad6/Ephb4/Myl2/Eng/Tbx3/Actc1	19
GO:0001570	BP	GO:0001570	vasculogenesis	12/256	99/23012	1.0898037388721e-09	1.14491667080935e-07	8.00391197090429e-08	Cav1/Hdac7/Ramp2/Tek/Tie1/Sox18/Ackr3/Hey1/Tmem100/Egfl7/Rasip1/Eng	12
GO:0030595	BP	GO:0030595	leukocyte chemotaxis	17/256	235/23012	1.31364020195718e-09	1.34173750627682e-07	9.37985196836095e-08	Edn1/Ripor2/Kit/Cd74/Vegfa/Csf1r/Lgmn/Mtus1/Cxcl12/Cxcl15/Aif1/S1pr1/Cxcl10/Csf1/Slamf9/Cxcr2/Il1b	17
GO:0001945	BP	GO:0001945	lymph vessel development	8/256	32/23012	1.75597872229302e-09	1.74506317888417e-07	1.21994311232989e-07	Vegfa/Tie1/Efnb2/Sox18/Ptpn14/Clec14a/Acvrl1/Tmem204	8
GO:0002262	BP	GO:0002262	myeloid cell homeostasis	16/256	215/23012	2.70103010170353e-09	2.61360202209576e-07	1.82712340951801e-07	Tspan9/Kit/Hba-a1/Hba-a2/Adgrf5/Vegfa/Csf1r/Rcor1/Bpgm/Mafb/Epas1/Kitl/Csf1/Cxcr2/Gata2/Hbb-b1	16
GO:0097529	BP	GO:0097529	myeloid leukocyte migration	17/256	247/23012	2.80211233620986e-09	2.64188898980606e-07	1.84689833333994e-07	Edn1/Ripor2/Kit/Cd74/Vegfa/Csf1r/Lgmn/Mtus1/Cxcl12/Cxcl15/Aif1/Cxcl10/Kitl/Csf1/Cxcr2/Pecam1/Il1b	17
GO:0003018	BP	GO:0003018	vascular process in circulatory system	17/256	248/23012	2.97875547535951e-09	2.69908698954905e-07	1.88688445342421e-07	Edn1/Npr3/Ptprm/Tjp1/Bmp6/Cav1/Vegfa/Ramp2/Fermt2/Cdh5/Pde3a/Nos3/Plvap/Ece1/Smad6/Cxcr2/Apoe	17
GO:0002690	BP	GO:0002690	positive regulation of leukocyte chemotaxis	12/256	108/23012	3.00958843001117e-09	2.69908698954905e-07	1.88688445342421e-07	Edn1/Ripor2/Cd74/Vegfa/Csf1r/Lgmn/Cxcl12/Aif1/Cxcl10/Csf1/Cxcr2/Il1b	12
GO:0010632	BP	GO:0010632	regulation of epithelial cell migration	17/256	249/23012	3.16559841549746e-09	2.77140604137718e-07	1.93744143625183e-07	Ppm1f/Ptprm/Rhoj/Amotl1/Jcad/Hdac7/Aqp1/Vegfa/Tek/Mmrn2/Lgmn/Ptprg/Nos3/Acvrl1/Dab2ip/Gata2/Apoe	17
GO:0002688	BP	GO:0002688	regulation of leukocyte chemotaxis	13/256	134/23012	3.53171879937100e-09	3.02003023843887e-07	2.11125025901199e-07	Edn1/Ripor2/Cd74/Vegfa/Csf1r/Lgmn/Mtus1/Cxcl12/Aif1/Cxcl10/Csf1/Cxcr2/Il1b	13
GO:0007159	BP	GO:0007159	leukocyte cell-cell adhesion	22/256	444/23012	6.03143285932442e-09	5.04035877812179e-07	3.52362656518426e-07	Cd83/Hfe/Ripor2/H2-Aa/H2-Eb1/Cav1/Efnb1/Gstp1/Cd74/Efnb2/Jam2/Fgl2/H2-Q10/Cxcl12/Aif1/Kitl/Sox13/Selp/Tbx21/Ephb4/Pecam1/Il1b	22
GO:0002042	BP	GO:0002042	cell migration involved in sprouting angiogenesis	9/256	55/23012	9.22797762355107e-09	7.54028304928828e-07	5.27127984952321e-07	Rhoj/Jcad/Hdac7/Vegfa/Mmrn2/Efnb2/Clec14a/Gata2/Ephb4	9
GO:0060840	BP	GO:0060840	artery development	12/256	122/23012	1.22097830402089e-08	9.75986353018435e-07	6.82294969889932e-07	Edn1/Ltbp1/Adgrf5/Ndst1/Vegfa/Efnb2/Acvrl1/Hey1/Smad6/Ephb4/Apoe/Eng	12
GO:0010594	BP	GO:0010594	regulation of endothelial cell migration	14/256	177/23012	1.2482125231071e-08	9.76527116481872e-07	6.82673008158462e-07	Ptprm/Rhoj/Amotl1/Jcad/Hdac7/Vegfa/Tek/Mmrn2/Lgmn/Nos3/Acvrl1/Dab2ip/Gata2/Apoe	14
GO:0045766	BP	GO:0045766	positive regulation of angiogenesis	14/256	182/23012	1.78123307554542e-08	1.33665184056745e-06	9.34429896988598e-07	Tjp1/Jcad/Aqp1/Vegfa/Ramp2/Tek/Tie1/Cdh5/Nos3/Acvrl1/Cxcr2/Gata2/Eng/Il1b	14
GO:1904018	BP	GO:1904018	positive regulation of vasculature development	14/256	182/23012	1.78123307554542e-08	1.33665184056745e-06	9.34429896988598e-07	Tjp1/Jcad/Aqp1/Vegfa/Ramp2/Tek/Tie1/Cdh5/Nos3/Acvrl1/Cxcr2/Gata2/Eng/Il1b	14
GO:0001938	BP	GO:0001938	positive regulation of endothelial cell proliferation	11/256	103/23012	2.10836467581461e-08	1.55049138259406e-06	1.08392137649248e-06	Bmp6/Cav2/Cav1/Jcad/Cdh13/Vegfa/Cxcl12/Acvrl1/Gata2/Egfl7/Ppp1r16b	11
GO:1903670	BP	GO:1903670	regulation of sprouting angiogenesis	8/256	43/23012	2.17811357917203e-08	1.57037718247364e-06	1.09782319098826e-06	Tjp1/Rhoj/Jcad/Epn2/Vegfa/Sema6a/Tspan18/Ppp1r16b	8
GO:0010721	BP	GO:0010721	negative regulation of cell development	18/256	321/23012	2.35183260081228e-08	1.66301701407438e-06	1.16258607513838e-06	Fas/Id1/Tmem176b/Tmem176a/Sema3f/Sema3g/Cd74/Vegfa/Sema6a/C1qc/Sema3c/Fgl2/Ntn1/Mafb/Tbx21/Gata2/Cit/Il1b	18
GO:0007411	BP	GO:0007411	axon guidance	16/256	252/23012	2.59116440330772e-08	1.76439102054861e-06	1.2334548680073e-06	Edn1/Ptprm/Sema3f/Nfib/Sema3g/Efnb1/Vegfa/Sema6a/Csf1r/Sema3c/Efnb2/Ntn1/Cxcl12/Ece1/B3gnt2/Lama5	16
GO:0097485	BP	GO:0097485	neuron projection guidance	16/256	252/23012	2.59116440330772e-08	1.76439102054861e-06	1.2334548680073e-06	Edn1/Ptprm/Sema3f/Nfib/Sema3g/Efnb1/Vegfa/Sema6a/Csf1r/Sema3c/Efnb2/Ntn1/Cxcl12/Ece1/B3gnt2/Lama5	16
GO:1903037	BP	GO:1903037	regulation of leukocyte cell-cell adhesion	20/256	405/23012	3.21131432839924e-08	2.146909597368e-06	1.50086690716764e-06	Cd83/Hfe/Ripor2/H2-Aa/H2-Eb1/Cav1/Efnb1/Gstp1/Cd74/Efnb2/Fgl2/H2-Q10/Cxcl12/Aif1/Kitl/Sox13/Selp/Tbx21/Ephb4/Il1b	20
GO:0031589	BP	GO:0031589	cell-substrate adhesion	19/256	368/23012	3.55658646096579e-08	2.33528007445914e-06	1.63255340933806e-06	Ppm1f/Ston1/Phldb2/Ptprk/Vwf/Cdh13/Nid1/Acer2/Vegfa/Tek/Fermt2/Dlc1/Gcnt2/Acvrl1/Csf1/Smad6/Bcam/Lama5/Pecam1	19
GO:0060841	BP	GO:0060841	venous blood vessel development	6/256	19/23012	4.29600223548948e-08	2.77129828419207e-06	1.93736610509055e-06	Vegfa/Sema3c/Efnb2/Acvrl1/Ephb4/Eng	6
GO:0045216	BP	GO:0045216	cell-cell junction organization	15/256	230/23012	5.00937645415472e-08	3.17577193481498e-06	2.22012655191394e-06	Tjp1/Esam/Bmp6/Cav1/Hdac7/Cdh13/Vegfa/Ramp2/Csf1r/Efnb2/Fermt2/Cdh5/Pard3/Pecam1/Il1b	15
GO:0007160	BP	GO:0007160	cell-matrix adhesion	15/256	235/23012	6.65064460394006e-08	4.14481698452332e-06	2.89756897820189e-06	Ppm1f/Ston1/Phldb2/Ptprk/Cdh13/Nid1/Acer2/Vegfa/Tek/Fermt2/Dlc1/Acvrl1/Csf1/Bcam/Pecam1	15
GO:0042692	BP	GO:0042692	muscle cell differentiation	21/256	466/23012	6.86074837063924e-08	4.20449529314008e-06	2.93928903878965e-06	Myh11/Edn1/Ripor2/Cav2/Kit/Homer1/Nid1/Vegfa/Ramp2/Csf1r/Efnb2/Cxcl12/Cxcl10/Hey1/Igfbp5/Tmem204/Smad6/Myl2/Eng/Tbx3/Actc1	21
GO:0001946	BP	GO:0001946	lymphangiogenesis	6/256	21/23012	8.43303527887416e-08	5.08332306892136e-06	3.55366214857821e-06	Vegfa/Tie1/Sox18/Ptpn14/Clec14a/Acvrl1	6
GO:0043117	BP	GO:0043117	positive regulation of vascular permeability	6/256	22/23012	1.1487679904276e-07	6.81293532387464e-06	4.76280379053344e-06	Tjp1/Bmp6/Vegfa/Pde3a/Cxcr2/Apoe	6
GO:0043535	BP	GO:0043535	regulation of blood vessel endothelial cell migration	10/256	96/23012	1.18717764841201e-07	6.92897176700155e-06	4.84392283612722e-06	Rhoj/Amotl1/Jcad/Hdac7/Vegfa/Mmrn2/Nos3/Acvrl1/Gata2/Apoe	10
GO:0001763	BP	GO:0001763	morphogenesis of a branching structure	15/256	249/23012	1.41652790326981e-07	8.13839546925482e-06	5.68940976938301e-06	Edn1/Csmd1/Vegfa/Tek/Sema3c/Tie1/Col4a1/Cxcl12/Areg/Csf1/Rasip1/Lama5/Eng/Tbx3/Il1b	15
GO:0070371	BP	GO:0070371	ERK1 and ERK2 cascade	18/256	362/23012	1.44345113491792e-07	8.16549203552797e-06	5.70835250440413e-06	Edn1/Timp3/Cav1/Nlrp12/Gstp1/Cd74/Vegfa/Sema6a/Tek/Csf1r/Fermt2/Ackr3/Gcnt2/Cxcl12/Ece1/Dab2ip/Apoe/Il1b	18
GO:0032970	BP	GO:0032970	regulation of actin filament-based process	19/256	403/23012	1.47443468033374e-07	8.21438836301083e-06	5.7425350707735e-06	Edn1/Ppm1f/Phldb2/Id1/Tjp1/Shank3/Esam/Cav1/Sptbn1/Csf1r/Fermt2/Pard3/Dlc1/Arhgef15/Cdc42ep1/S1pr1/Eln/Cit/Pecam1	19
GO:0031032	BP	GO:0031032	actomyosin structure organization	14/256	218/23012	1.70467451045495e-07	9.35535548498931e-06	6.5401652074328e-06	Myh11/Edn1/Ppm1f/Phldb2/Tjp1/Frmd5/Fermt2/Dlc1/Arhgef15/S1pr1/Cnn3/Eln/Myl2/Actc1	14
GO:0050863	BP	GO:0050863	regulation of T cell activation	19/256	408/23012	1.78337351062936e-07	9.64332999791786e-06	6.74148314699209e-06	Cd83/Hfe/Fas/Ripor2/H2-Aa/H2-Eb1/Cav1/Efnb1/Cd74/Efnb2/Fgl2/Ctla2a/H2-Q10/Aif1/Kitl/Sox13/Tbx21/Ephb4/Il1b	19
GO:0036303	BP	GO:0036303	lymph vessel morphogenesis	6/256	24/23012	2.0339646649326e-07	1.0838968221677e-05	7.57733289361617e-06	Vegfa/Tie1/Sox18/Ptpn14/Clec14a/Acvrl1	6
GO:0048754	BP	GO:0048754	branching morphogenesis of an epithelial tube	13/256	191/23012	2.42802354728762e-07	1.27540608333951e-05	8.91614060522761e-06	Edn1/Csmd1/Vegfa/Tek/Tie1/Col4a1/Cxcl12/Areg/Csf1/Rasip1/Lama5/Eng/Tbx3	13
GO:0034332	BP	GO:0034332	adherens junction organization	8/256	58/23012	2.49323842064298e-07	1.29121657362032e-05	9.02666897436645e-06	Tjp1/Bmp6/Cdh13/Vegfa/Ramp2/Efnb2/Fermt2/Cdh5	8
GO:0048660	BP	GO:0048660	regulation of smooth muscle cell proliferation	13/256	192/23012	2.57888535419037e-07	1.31702242324416e-05	9.20707315048666e-06	Edn1/Timp3/Npr3/Cav1/Cdh13/Gstp1/Vegfa/Nos3/Retn/Aif1/S1pr1/Igfbp5/Apoe	13
GO:0070372	BP	GO:0070372	regulation of ERK1 and ERK2 cascade	17/256	338/23012	2.75276231577474e-07	1.38656260754845e-05	9.69321640248293e-06	Timp3/Cav1/Nlrp12/Gstp1/Cd74/Vegfa/Sema6a/Tek/Csf1r/Fermt2/Ackr3/Gcnt2/Cxcl12/Ece1/Dab2ip/Apoe/Il1b	17
GO:0071674	BP	GO:0071674	mononuclear cell migration	13/256	194/23012	2.90604404898202e-07	1.44398972541985e-05	1.00946793280428e-05	Ripor2/Nlrp12/Csf1r/Lgmn/Jam2/Cxcl12/Aif1/S1pr1/Cxcl10/Csf1/Slamf9/Tbx21/Pecam1	13
GO:0001837	BP	GO:0001837	epithelial to mesenchymal transition	12/256	163/23012	3.05160016617872e-07	1.49092572621742e-05	1.04228006911325e-05	Edn1/Phldb2/Tcof1/Vegfa/Fermt2/Gcnt2/Hey1/Tmem100/Dab2ip/Eng/Tbx3/Il1b	12
GO:0061138	BP	GO:0061138	morphogenesis of a branching epithelium	14/256	229/23012	3.11151409553077e-07	1.49092572621742e-05	1.04228006911325e-05	Edn1/Csmd1/Vegfa/Tek/Sema3c/Tie1/Col4a1/Cxcl12/Areg/Csf1/Rasip1/Lama5/Eng/Tbx3	14
GO:0045601	BP	GO:0045601	regulation of endothelial cell differentiation	7/256	41/23012	3.16269259300949e-07	1.49092572621742e-05	1.04228006911325e-05	Id1/Bmp6/Vegfa/Cdh5/Acvrl1/Tmem100/Il1b	7
GO:0071711	BP	GO:0071711	basement membrane organization	7/256	41/23012	3.16269259300949e-07	1.49092572621742e-05	1.04228006911325e-05	Phldb2/Cav2/Cav1/Nid1/Ramp2/Col4a1/Hmcn1	7
GO:0048844	BP	GO:0048844	artery morphogenesis	9/256	83/23012	3.63843335721876e-07	1.69348347525233e-05	1.18388464468064e-05	Edn1/Adgrf5/Vegfa/Efnb2/Acvrl1/Hey1/Ephb4/Apoe/Eng	9
GO:0007015	BP	GO:0007015	actin filament organization	20/256	474/23012	4.05161464880975e-07	1.86222338295918e-05	1.30184775952545e-05	Ppm1f/Phldb2/Id1/Tjp1/Shank3/Esam/Rhoj/Sptbn1/Fermt2/Dlc1/Arhgef15/Cdc42ep1/Aif1/S1pr1/Diaph3/Cnn3/Eln/Cit/Pecam1/Actc1	20
GO:0001755	BP	GO:0001755	neural crest cell migration	8/256	62/23012	4.23246708439843e-07	1.92133104559667e-05	1.3431688915011e-05	Edn1/Sema3f/Sema3g/Efnb1/Sema6a/Sema3c/Kitl/Lama5	8
GO:0048659	BP	GO:0048659	smooth muscle cell proliferation	13/256	201/23012	4.36415320989117e-07	1.95695016497193e-05	1.36806959416614e-05	Edn1/Timp3/Npr3/Cav1/Cdh13/Gstp1/Vegfa/Nos3/Retn/Aif1/S1pr1/Igfbp5/Apoe	13
GO:0022409	BP	GO:0022409	positive regulation of cell-cell adhesion	17/256	352/23012	4.85880567999771e-07	2.12688434349424e-05	1.48686760282637e-05	Cd83/H2-Aa/H2-Eb1/Tjp1/Cav1/Efnb1/Cd74/Efnb2/Gcnt2/Podxl/H2-Q10/Aif1/Kitl/Sox13/Selp/Ephb4/Il1b	17
GO:0032956	BP	GO:0032956	regulation of actin cytoskeleton organization	17/256	352/23012	4.85880567999771e-07	2.12688434349424e-05	1.48686760282637e-05	Edn1/Ppm1f/Phldb2/Id1/Tjp1/Shank3/Esam/Sptbn1/Csf1r/Fermt2/Dlc1/Arhgef15/Cdc42ep1/S1pr1/Eln/Cit/Pecam1	17
GO:0090497	BP	GO:0090497	mesenchymal cell migration	8/256	64/23012	5.43550400578315e-07	2.30865228388027e-05	1.61393838719655e-05	Edn1/Sema3f/Sema3g/Efnb1/Sema6a/Sema3c/Kitl/Lama5	8
GO:0014032	BP	GO:0014032	neural crest cell development	9/256	87/23012	5.46240817779667e-07	2.30865228388027e-05	1.61393838719655e-05	Edn1/Sema3f/Sema3g/Efnb1/Tcof1/Sema6a/Sema3c/Kitl/Lama5	9
GO:0048041	BP	GO:0048041	focal adhesion assembly	9/256	87/23012	5.46240817779667e-07	2.30865228388027e-05	1.61393838719655e-05	Ppm1f/Ston1/Phldb2/Ptprk/Vegfa/Tek/Fermt2/Dlc1/Acvrl1	9
GO:0110053	BP	GO:0110053	regulation of actin filament organization	15/256	281/23012	6.65924769189988e-07	2.78250610944498e-05	1.94520129947602e-05	Ppm1f/Phldb2/Id1/Tjp1/Shank3/Esam/Sptbn1/Fermt2/Dlc1/Arhgef15/Cdc42ep1/S1pr1/Eln/Cit/Pecam1	15
GO:0022408	BP	GO:0022408	negative regulation of cell-cell adhesion	13/256	209/23012	6.80515277191531e-07	2.81152210588007e-05	1.96548587451415e-05	Hfe/Ppm1f/Ripor2/H2-Aa/Ccm2l/Bmp6/Gstp1/Cd74/Vegfa/Fgl2/Podxl/Cxcl12/Tbx21	13
GO:1901888	BP	GO:1901888	regulation of cell junction assembly	14/256	246/23012	7.38019998738302e-07	3.01522170595638e-05	2.1078886981508e-05	Ppm1f/Phldb2/Tjp1/Negr1/Cav1/Vegfa/Tek/Fermt2/Snca/Dlc1/Ntn1/Arhgef15/Acvrl1/Il1b	14
GO:0090287	BP	GO:0090287	regulation of cellular response to growth factor stimulus	16/256	323/23012	7.60486647350669e-07	3.07286747506419e-05	2.14818784595759e-05	Cav2/Cav1/Jcad/Ltbp1/Epn2/Vegfa/Sema6a/Tek/Mmrn2/Cdh5/Acvrl1/Chst11/Tmem204/Smad6/Dab2ip/Eng	16
GO:0001937	BP	GO:0001937	negative regulation of endothelial cell proliferation	7/256	47/23012	8.3584631250665e-07	3.34065966422495e-05	2.33539667636298e-05	Ptprm/Cav2/Cav1/Mmrn2/Acvrl1/Apoe/Eng	7
GO:1903587	BP	GO:1903587	regulation of blood vessel endothelial cell proliferation involved in sprouting angiogenesis	5/256	17/23012	9.0900180384066e-07	3.59397809970119e-05	2.51248715900271e-05	Jcad/Vegfa/Mmrn2/Gata2/Ppp1r16b	5
GO:0032535	BP	GO:0032535	regulation of cellular component size	18/256	412/23012	9.53208900659268e-07	3.7286692848129e-05	2.60664740807383e-05	Edn1/Shank3/Esam/Sema3f/Sptbn1/Aqp1/Sema3g/Vegfa/Sema6a/Sema3c/Ntn1/Cdc42ep1/Cxcl12/Mapt/Eln/Cit/Apoe/Pecam1	18
GO:0042060	BP	GO:0042060	wound healing	17/256	370/23012	9.68140076983179e-07	3.74721164533384e-05	2.61961004763759e-05	Phldb2/Ccm2l/Cav1/Vwf/Plat/Tspan9/Aqp1/Vegfa/Fermt2/Pard3/Acvrl1/Selp/Gata2/Thbd/Apoe/Eng/Pecam1	17
GO:0060560	BP	GO:0060560	developmental growth involved in morphogenesis	15/256	292/23012	1.07845170498051e-06	4.1306947075139e-05	2.88769634162545e-05	Edn1/Sema3f/Nkd1/Sema3g/Vegfa/Sema6a/Csf1r/Sema3c/Ntn1/Cxcl12/Areg/Mapt/S1pr1/Csf1/Apoe	15
GO:0001885	BP	GO:0001885	endothelial cell development	8/256	72/23012	1.3614202620475e-06	5.15811950253577e-05	3.6059510256337e-05	Id1/Tjp1/Vegfa/Sox18/Cdh5/Ppp1r16b/Pecam1/Il1b	8
GO:0030218	BP	GO:0030218	erythrocyte differentiation	11/256	155/23012	1.37475037054258e-06	5.15811950253577e-05	3.6059510256337e-05	Kit/Hba-a1/Hba-a2/Adgrf5/Vegfa/Rcor1/Bpgm/Mafb/Epas1/Gata2/Hbb-b1	11
GO:0048010	BP	GO:0048010	vascular endothelial growth factor receptor signaling pathway	7/256	51/23012	1.48149715348727e-06	5.45930261930934e-05	3.8165028688586e-05	Epn2/Vegfa/Tek/Mmrn2/Clec14a/Tmem204/Dab2ip	7
GO:0007044	BP	GO:0007044	cell-substrate junction assembly	9/256	98/23012	1.50700020285998e-06	5.45930261930934e-05	3.8165028688586e-05	Ppm1f/Ston1/Phldb2/Ptprk/Vegfa/Tek/Fermt2/Dlc1/Acvrl1	9
GO:0048864	BP	GO:0048864	stem cell development	9/256	98/23012	1.50700020285998e-06	5.45930261930934e-05	3.8165028688586e-05	Edn1/Sema3f/Sema3g/Efnb1/Tcof1/Sema6a/Sema3c/Kitl/Lama5	9
GO:0048662	BP	GO:0048662	negative regulation of smooth muscle cell proliferation	8/256	73/23012	1.51441084353971e-06	5.45930261930934e-05	3.8165028688586e-05	Timp3/Npr3/Cav1/Gstp1/Nos3/Aif1/Igfbp5/Apoe	8
GO:0048841	BP	GO:0048841	regulation of axon extension involved in axon guidance	6/256	33/23012	1.53898888830709e-06	5.49404091485937e-05	3.84078780301063e-05	Sema3f/Sema3g/Vegfa/Sema6a/Sema3c/Cxcl12	6
GO:0022612	BP	GO:0022612	gland morphogenesis	11/256	158/23012	1.66016587138566e-06	5.86964414335104e-05	4.1033654432427e-05	Csmd1/Cav1/Nfib/Sema3c/Ntn1/Areg/Mki67/Igfbp5/Csf1/Lama5/Tbx3	11
GO:0061028	BP	GO:0061028	establishment of endothelial barrier	7/256	52/23012	1.69582387293225e-06	5.93861369597321e-05	4.15158084982511e-05	Tjp1/Vegfa/Sox18/Cdh5/Ppp1r16b/Pecam1/Il1b	7
GO:0001952	BP	GO:0001952	regulation of cell-matrix adhesion	10/256	128/23012	1.74919503818867e-06	6.06772656171674e-05	4.24184139350222e-05	Ppm1f/Phldb2/Cdh13/Acer2/Vegfa/Tek/Fermt2/Dlc1/Acvrl1/Csf1	10
GO:0014033	BP	GO:0014033	neural crest cell differentiation	9/256	100/23012	1.78681791837422e-06	6.14030793071215e-05	4.29258175766831e-05	Edn1/Sema3f/Sema3g/Efnb1/Tcof1/Sema6a/Sema3c/Kitl/Lama5	9
GO:0030099	BP	GO:0030099	myeloid cell differentiation	19/256	476/23012	1.81174848738181e-06	6.16833258157678e-05	4.31217330037659e-05	Fas/Kit/Hba-a1/Hba-a2/Adgrf5/Cd74/Vegfa/C1qc/Csf1r/Rcor1/Bpgm/Mafb/Epas1/Kitl/Csf1/Il1rl1/Meis2/Gata2/Hbb-b1	19
GO:0035904	BP	GO:0035904	aorta development	8/256	75/23012	1.86467505821231e-06	6.29028457710704e-05	4.39742780507433e-05	Ltbp1/Ndst1/Efnb2/Acvrl1/Hey1/Smad6/Ephb4/Eng	8
GO:0097530	BP	GO:0097530	granulocyte migration	11/256	161/23012	1.99637200046522e-06	6.67332713246418e-05	4.66520614845556e-05	Edn1/Ripor2/Cd74/Vegfa/Csf1r/Cxcl15/Cxcl10/Csf1/Cxcr2/Pecam1/Il1b	11
GO:0071621	BP	GO:0071621	granulocyte chemotaxis	10/256	130/23012	2.01468626162079e-06	6.67387512070237e-05	4.66558923743761e-05	Edn1/Ripor2/Cd74/Vegfa/Csf1r/Cxcl15/Cxcl10/Csf1/Cxcr2/Il1b	10
GO:0010634	BP	GO:0010634	positive regulation of epithelial cell migration	11/256	162/23012	2.12100656742293e-06	6.96334031108404e-05	4.86794928350264e-05	Ppm1f/Rhoj/Amotl1/Jcad/Hdac7/Aqp1/Vegfa/Tek/Lgmn/Nos3/Gata2	11
GO:0150115	BP	GO:0150115	cell-substrate junction organization	9/256	105/23012	2.68975696696209e-06	8.75242156417666e-05	6.11866466075588e-05	Ppm1f/Ston1/Phldb2/Ptprk/Vegfa/Tek/Fermt2/Dlc1/Acvrl1	9
GO:0014009	BP	GO:0014009	glial cell proliferation	8/256	79/23012	2.77517304572214e-06	8.95115025361429e-05	6.25759240780559e-05	Fas/Shank3/Nfib/Csf1r/Ntn1/Areg/Csf1/Il1b	8
GO:0034101	BP	GO:0034101	erythrocyte homeostasis	11/256	167/23012	2.85223487205584e-06	8.9558338589879e-05	6.26086663431243e-05	Kit/Hba-a1/Hba-a2/Adgrf5/Vegfa/Rcor1/Bpgm/Mafb/Epas1/Gata2/Hbb-b1	11
GO:0050680	BP	GO:0050680	negative regulation of epithelial cell proliferation	11/256	167/23012	2.85223487205584e-06	8.9558338589879e-05	6.26086663431243e-05	Ptprk/Ptprm/Cav2/Cav1/Nfib/Mmrn2/Efnb2/Acvrl1/Dab2ip/Apoe/Eng	11
GO:0043116	BP	GO:0043116	negative regulation of vascular permeability	5/256	21/23012	2.88231181026338e-06	8.9558338589879e-05	6.26086663431243e-05	Vegfa/Ramp2/Fermt2/Pde3a/Apoe	5
GO:0090050	BP	GO:0090050	positive regulation of cell migration involved in sprouting angiogenesis	5/256	21/23012	2.88231181026338e-06	8.9558338589879e-05	6.26086663431243e-05	Rhoj/Jcad/Hdac7/Vegfa/Gata2	5
GO:1902105	BP	GO:1902105	regulation of leukocyte differentiation	16/256	358/23012	2.89897434634954e-06	8.9558338589879e-05	6.26086663431243e-05	Cd83/Fas/H2-Aa/Tmem176b/Tmem176a/Cd74/C1qc/Csf1r/Fgl2/Ctla2a/Mafb/Kitl/Csf1/Sox13/Tbx21/Gata2	16
GO:1903706	BP	GO:1903706	regulation of hemopoiesis	18/256	446/23012	2.92276329365936e-06	8.9558338589879e-05	6.26086663431243e-05	Cd83/Fas/H2-Aa/Tmem176b/Tmem176a/Cd74/C1qc/Csf1r/Rcor1/Fgl2/Ctla2a/Mafb/Kitl/Csf1/Sox13/Tbx21/Meis2/Gata2	18
GO:1903589	BP	GO:1903589	positive regulation of blood vessel endothelial cell proliferation involved in sprouting angiogenesis	4/256	10/23012	2.98082071080409e-06	9.05824607737739e-05	6.33246122295223e-05	Jcad/Vegfa/Gata2/Ppp1r16b	4
GO:0048846	BP	GO:0048846	axon extension involved in axon guidance	6/256	37/23012	3.11219754288471e-06	9.30369948389193e-05	6.50405340156137e-05	Sema3f/Sema3g/Vegfa/Sema6a/Sema3c/Cxcl12	6
GO:1902284	BP	GO:1902284	neuron projection extension involved in neuron projection guidance	6/256	37/23012	3.11219754288471e-06	9.30369948389193e-05	6.50405340156137e-05	Sema3f/Sema3g/Vegfa/Sema6a/Sema3c/Cxcl12	6
GO:0061383	BP	GO:0061383	trabecula morphogenesis	7/256	57/23012	3.19643787615947e-06	9.43913155977772e-05	6.59873159439967e-05	Ccm2l/Vegfa/Tek/S1pr1/Hey1/Slc40a1/Eng	7
GO:0050867	BP	GO:0050867	positive regulation of cell activation	18/256	449/23012	3.20884265698182e-06	9.43913155977772e-05	6.59873159439967e-05	Cd83/H2-Aa/H2-Eb1/Cav1/Efnb1/Cd74/Csf1r/Efnb2/H2-Q10/Aif1/Kitl/Sox13/Selp/Il1rl1/Tbx21/Gata2/Ephb4/Il1b	18
GO:0033002	BP	GO:0033002	muscle cell proliferation	14/256	279/23012	3.25138558005359e-06	9.48836887131513e-05	6.63315253675094e-05	Edn1/Timp3/Npr3/Cav2/Cav1/Cdh13/Gstp1/Vegfa/Nos3/Retn/Aif1/S1pr1/Igfbp5/Apoe	14
GO:0030856	BP	GO:0030856	regulation of epithelial cell differentiation	11/256	171/23012	3.587635730789e-06	0.000103443	7.23150047199876e-05	Id1/Bmp6/Cav1/Vegfa/Csf1r/Cdh5/Acvrl1/Hey1/Tmem100/Tbx3/Il1b	11
GO:0043536	BP	GO:0043536	positive regulation of blood vessel endothelial cell migration	7/256	58/23012	3.60094372397645e-06	0.000103443	7.23150047199876e-05	Rhoj/Amotl1/Jcad/Hdac7/Vegfa/Nos3/Gata2	7
GO:0051145	BP	GO:0051145	smooth muscle cell differentiation	8/256	82/23012	3.68406779502608e-06	0.00010501	7.3410800126101e-05	Kit/Vegfa/Ramp2/Hey1/Tmem204/Smad6/Eng/Tbx3	8
GO:0010595	BP	GO:0010595	positive regulation of endothelial cell migration	9/256	110/23012	3.96044579419155e-06	0.00011202	7.83110010479009e-05	Rhoj/Amotl1/Jcad/Hdac7/Vegfa/Tek/Lgmn/Nos3/Gata2	9
GO:0051017	BP	GO:0051017	actin filament bundle assembly	11/256	174/23012	4.24324083148101e-06	0.000118524	8.2858245379241e-05	Ppm1f/Phldb2/Id1/Tjp1/Shank3/Fermt2/Dlc1/Arhgef15/Aif1/S1pr1/Eln	11
GO:0003203	BP	GO:0003203	endocardial cushion morphogenesis	6/256	39/23012	4.28711683196851e-06	0.000118524	8.2858245379241e-05	Nos3/Acvrl1/Hey1/Tmem100/Eng/Tbx3	6
GO:0090049	BP	GO:0090049	regulation of cell migration involved in sprouting angiogenesis	6/256	39/23012	4.28711683196851e-06	0.000118524	8.2858245379241e-05	Rhoj/Jcad/Hdac7/Vegfa/Mmrn2/Gata2	6
GO:0060443	BP	GO:0060443	mammary gland morphogenesis	7/256	60/23012	4.53864768917447e-06	0.000124542	8.70650247994034e-05	Csmd1/Cav1/Ntn1/Areg/Igfbp5/Csf1/Tbx3	7
GO:0002043	BP	GO:0002043	blood vessel endothelial cell proliferation involved in sprouting angiogenesis	5/256	23/23012	4.68023152257545e-06	0.000127476	8.91159873538344e-05	Jcad/Vegfa/Mmrn2/Gata2/Ppp1r16b	5
GO:0048675	BP	GO:0048675	axon extension	10/256	143/23012	4.76062965826597e-06	0.000128712	8.99803221786803e-05	Edn1/Sema3f/Sema3g/Vegfa/Sema6a/Sema3c/Ntn1/Cxcl12/Mapt/Apoe	10
GO:0030516	BP	GO:0030516	regulation of axon extension	9/256	113/23012	4.94684583479596e-06	0.00013277	9.28174992590991e-05	Sema3f/Sema3g/Vegfa/Sema6a/Sema3c/Ntn1/Cxcl12/Mapt/Apoe	9
GO:0061572	BP	GO:0061572	actin filament bundle organization	11/256	177/23012	5.00128564773938e-06	0.000133259	9.31589592050311e-05	Ppm1f/Phldb2/Id1/Tjp1/Shank3/Fermt2/Dlc1/Arhgef15/Aif1/S1pr1/Eln	11
GO:0001974	BP	GO:0001974	blood vessel remodeling	7/256	61/23012	5.07874479647771e-06	0.000134349	9.39212025217612e-05	Npr3/Vegfa/Sema3c/Nos3/Acvrl1/Epas1/Eln	7
GO:0048771	BP	GO:0048771	tissue remodeling	12/256	213/23012	5.11932938924258e-06	0.000134456	9.39955065303036e-05	Npr3/Cav1/Vegfa/Csf1r/Sema3c/Tie1/Nos3/Acvrl1/Epas1/S1pr1/Igfbp5/Eln	12
GO:1902904	BP	GO:1902904	negative regulation of supramolecular fiber organization	11/256	178/23012	5.2789906677626e-06	0.000137666	9.62396059027717e-05	Phldb2/Tjp1/Shank3/Sptbn1/Stmn2/Snca/Cdh5/Dlc1/S1pr1/Apoe/Pecam1	11
GO:0033674	BP	GO:0033674	positive regulation of kinase activity	17/256	420/23012	5.33149312014421e-06	0.000138056	9.6512277237896e-05	Edn1/Kit/Cenpe/Cd74/Vegfa/Tek/Csf1r/Tie1/Fermt2/Snca/Kitl/Ghr/Csf1/Stil/Dab2ip/Ephb4/Il1b	17
GO:0071622	BP	GO:0071622	regulation of granulocyte chemotaxis	7/256	62/23012	5.67126273495529e-06	0.000145827	0.000101945	Edn1/Ripor2/Cd74/Csf1r/Csf1/Cxcr2/Il1b	7
GO:0032231	BP	GO:0032231	regulation of actin filament bundle assembly	9/256	115/23012	5.7155926518409e-06	0.000145946	0.000102028	Ppm1f/Phldb2/Id1/Tjp1/Shank3/Fermt2/Dlc1/Arhgef15/S1pr1	9
GO:0007517	BP	GO:0007517	muscle organ development	16/256	380/23012	6.18107135404129e-06	0.000156743	0.000109577	Ripor2/Ccm2l/Cav2/Cav1/Hdac7/Homer1/Cenpf/Unc45b/S1pr1/Hey1/Eln/Des/Myl2/Lama5/Eng/Actc1	16
GO:0003151	BP	GO:0003151	outflow tract morphogenesis	8/256	88/23012	6.27349743703301e-06	0.000157998	0.000110453	Edn1/Vegfa/Sema3c/Hey1/Eln/Smad6/Eng/Tbx3	8
GO:0002696	BP	GO:0002696	positive regulation of leukocyte activation	17/256	427/23012	6.62574309752813e-06	0.000165734	0.000115862	Cd83/H2-Aa/H2-Eb1/Cav1/Efnb1/Cd74/Csf1r/Efnb2/H2-Q10/Aif1/Kitl/Sox13/Il1rl1/Tbx21/Gata2/Ephb4/Il1b	17
GO:0048845	BP	GO:0048845	venous blood vessel morphogenesis	4/256	12/23012	6.90389502659847e-06	0.000171177	0.000119667	Vegfa/Efnb2/Ephb4/Eng	4
GO:0071900	BP	GO:0071900	regulation of protein serine/threonine kinase activity	15/256	340/23012	6.94310008102649e-06	0.000171177	0.000119667	Edn1/Cav1/Kit/Gstp1/Vegfa/Fermt2/Snca/Kitl/Ghr/Stil/Dab2ip/Hexim1/Rasip1/Apoe/Il1b	15
GO:0051893	BP	GO:0051893	regulation of focal adhesion assembly	7/256	64/23012	7.02955397148094e-06	0.000171177	0.000119667	Ppm1f/Phldb2/Vegfa/Tek/Fermt2/Dlc1/Acvrl1	7
GO:0090109	BP	GO:0090109	regulation of cell-substrate junction assembly	7/256	64/23012	7.02955397148094e-06	0.000171177	0.000119667	Ppm1f/Phldb2/Vegfa/Tek/Fermt2/Dlc1/Acvrl1	7
GO:0007265	BP	GO:0007265	Ras protein signal transduction	15/256	341/23012	7.19137537899394e-06	0.000173965	0.000121616	Ripor2/Rhoj/Rasgrp3/Cdh13/Dlc1/Ntn1/Cdc42ep1/Aif1/Kitl/Csf1/Rasa4/Dab2ip/Rasip1/Apoe/Pecam1	15
GO:0014706	BP	GO:0014706	striated muscle tissue development	14/256	300/23012	7.47887053265978e-06	0.000179737	0.000125651	Myh11/Edn1/Ccm2l/Hdac7/Vegfa/Sema3c/Efnb2/Cenpf/S1pr1/Hey1/Myl2/Eng/Tbx3/Actc1	14
GO:1903039	BP	GO:1903039	positive regulation of leukocyte cell-cell adhesion	14/256	301/23012	7.76694004829321e-06	0.000185448	0.000129644	Cd83/H2-Aa/H2-Eb1/Cav1/Efnb1/Cd74/Efnb2/H2-Q10/Aif1/Kitl/Sox13/Selp/Ephb4/Il1b	14
GO:0008361	BP	GO:0008361	regulation of cell size	12/256	223/23012	8.16731947870285e-06	0.00019375	0.000135447	Edn1/Shank3/Sema3f/Aqp1/Sema3g/Vegfa/Sema6a/Sema3c/Ntn1/Cxcl12/Mapt/Apoe	12
GO:0050731	BP	GO:0050731	positive regulation of peptidyl-tyrosine phosphorylation	11/256	187/23012	8.44902792705641e-06	0.000199148	0.000139221	Bmp6/Cav2/Tspan9/Kit/Cd74/Vegfa/Csf1r/Areg/Kitl/Ghr/Pecam1	11
GO:0043254	BP	GO:0043254	regulation of protein-containing complex assembly	17/256	436/23012	8.70101945473039e-06	0.000203781	0.00014246	Fas/Esam/Cav1/Sptbn1/Stmn2/Vegfa/Fermt2/Snca/Cdh5/Cdc42ep1/Mapt/Eln/Selp/Dab2ip/Rasip1/Apoe/Pecam1	17
GO:0044331	BP	GO:0044331	cell-cell adhesion mediated by cadherin	6/256	44/23012	8.8540445070979e-06	0.000206053	0.000144048	Ppm1f/Tjp1/Bmp6/Cdh13/Vegfa/Cdh5	6
GO:0051341	BP	GO:0051341	regulation of oxidoreductase activity	8/256	93/23012	9.47602755800174e-06	0.000219141	0.000153197	Edn1/Npr3/Cav1/Gstp1/Snca/Apoe/Eng/Il1b	8
GO:0001569	BP	GO:0001569	branching involved in blood vessel morphogenesis	6/256	45/23012	1.01216447568981e-05	0.000231163	0.000161602	Edn1/Vegfa/Tek/Col4a1/Cxcl12/Eng	6
GO:0032768	BP	GO:0032768	regulation of monooxygenase activity	6/256	45/23012	1.01216447568981e-05	0.000231163	0.000161602	Npr3/Cav1/Snca/Apoe/Eng/Il1b	6
GO:0010810	BP	GO:0010810	regulation of cell-substrate adhesion	12/256	228/23012	1.02168707463305e-05	0.000231898	0.000162116	Ppm1f/Phldb2/Cdh13/Nid1/Acer2/Vegfa/Tek/Fermt2/Dlc1/Gcnt2/Acvrl1/Csf1	12
GO:0042063	BP	GO:0042063	gliogenesis	16/256	396/23012	1.03467639091107e-05	0.000233405	0.00016317	Sh3tc2/Hexb/Fas/Shank3/Nfib/C1qa/Csf1r/Pard3/Ntn1/Areg/Csf1/Ptprb/Sox13/Prx/Dab2ip/Il1b	16
GO:0050767	BP	GO:0050767	regulation of neurogenesis	18/256	493/23012	1.15318922466448e-05	0.000256993	0.000179659	Fas/Id1/Shank3/Sema3f/Kit/Sema3g/Vegfa/Sema6a/Csf1r/Sema3c/Ntn1/Cxcl12/Mapt/Hey1/Gata2/Cit/Apoe/Il1b	18
GO:0002691	BP	GO:0002691	regulation of cellular extravasation	6/256	46/23012	1.15321722195206e-05	0.000256993	0.000179659	Ripor2/Lyve1/Plvap/Cxcl12/Selp/Pecam1	6
GO:0150116	BP	GO:0150116	regulation of cell-substrate junction organization	7/256	69/23012	1.16452931753262e-05	0.00025795	0.000180329	Ppm1f/Phldb2/Vegfa/Tek/Fermt2/Dlc1/Acvrl1	7
GO:0050679	BP	GO:0050679	positive regulation of epithelial cell proliferation	12/256	233/23012	1.27035818150402e-05	0.000279707	0.000195538	Id1/Bmp6/Cav2/Cav1/Jcad/Cdh13/Vegfa/Cxcl12/Acvrl1/Gata2/Egfl7/Ppp1r16b	12
GO:0006898	BP	GO:0006898	receptor-mediated endocytosis	13/256	273/23012	1.28110206614221e-05	0.000280394	0.000196018	Hfe/Ston1/Cav2/Cav1/Lyve1/Vegfa/Ramp2/Efnb2/Snca/Pard3/Ackr3/Cxcr2/Apoe	13
GO:0050870	BP	GO:0050870	positive regulation of T cell activation	13/256	275/23012	1.38422554592525e-05	0.000301171	0.000210544	Cd83/H2-Aa/H2-Eb1/Cav1/Efnb1/Cd74/Efnb2/H2-Q10/Aif1/Kitl/Sox13/Ephb4/Il1b	13
GO:0007178	BP	GO:0007178	transmembrane receptor protein serine/threonine kinase signaling pathway	16/256	407/23012	1.45121507800727e-05	0.000312954	0.000218781	Hfe/Ptprk/Id1/Bmp6/Cav2/Cav1/Sptbn1/Ltbp1/Fermt2/Cdh5/Gcnt2/Acvrl1/Chst11/Tmem100/Smad6/Eng	16
GO:0061387	BP	GO:0061387	regulation of extent of cell growth	9/256	129/23012	1.45540273953304e-05	0.000312954	0.000218781	Sema3f/Sema3g/Vegfa/Sema6a/Sema3c/Ntn1/Cxcl12/Mapt/Apoe	9
GO:0051251	BP	GO:0051251	positive regulation of lymphocyte activation	15/256	364/23012	1.55714143040656e-05	0.000332437	0.000232401	Cd83/H2-Aa/H2-Eb1/Cav1/Efnb1/Cd74/Csf1r/Efnb2/H2-Q10/Aif1/Kitl/Sox13/Tbx21/Ephb4/Il1b	15
GO:0003180	BP	GO:0003180	aortic valve morphogenesis	5/256	29/23012	1.56408873477918e-05	0.000332437	0.000232401	Tie1/Nos3/Hey1/Eln/Smad6	5
GO:0003205	BP	GO:0003205	cardiac chamber development	11/256	201/23012	1.66612016564776e-05	0.000352088	0.000246138	Ccm2l/Ltbp1/Ndst1/Tek/Sema3c/Nos3/Hey1/Smad6/Myl2/Eng/Tbx3	11
GO:0097084	BP	GO:0097084	vascular associated smooth muscle cell development	4/256	15/23012	1.85434265059464e-05	0.000389624	0.000272379	Vegfa/Ramp2/Smad6/Eng	4
GO:0007043	BP	GO:0007043	cell-cell junction assembly	10/256	167/23012	1.86590581393451e-05	0.000389826	0.00027252	Tjp1/Esam/Cav1/Hdac7/Cdh13/Ramp2/Cdh5/Pard3/Pecam1/Il1b	10
GO:0071526	BP	GO:0071526	semaphorin-plexin signaling pathway	6/256	50/23012	1.88502823482265e-05	0.000391596	0.000273758	Edn1/Sema3f/Sema3g/Sema6a/Sema3c/Ece1	6
GO:0019932	BP	GO:0019932	second-messenger-mediated signaling	14/256	326/23012	1.90108259274911e-05	0.000392712	0.000274538	Edn1/Cdh13/Aqp1/Vegfa/Pde3a/Ackr3/Nos3/Tspan18/Mapt/Ece1/Tmem100/Selp/Cxcr2/Apoe	14
GO:0002064	BP	GO:0002064	epithelial cell development	12/256	243/23012	1.93065208402696e-05	0.000396593	0.000277251	Id1/Tjp1/Bmp6/Vegfa/Sox18/Cdh5/Pard3/Epas1/Gata2/Ppp1r16b/Pecam1/Il1b	12
GO:0042326	BP	GO:0042326	negative regulation of phosphorylation	15/256	371/23012	1.94496208232835e-05	0.000397313	0.000277754	Ppm1f/Cav1/Nlrp12/Gstp1/Snca/Pard3/Mapt/Ptprb/Dab2ip/Hexim1/Rasip1/Apoe/Eng/Pecam1/Il1b	15
GO:0071560	BP	GO:0071560	cellular response to transforming growth factor beta stimulus	12/256	248/23012	2.36092168890287e-05	0.000478934	0.000334814	Ptprk/Cav2/Cav1/Ltbp1/Fermt2/Cdh5/Nos3/Gcnt2/Acvrl1/Chst11/Smad6/Eng	12
GO:0003197	BP	GO:0003197	endocardial cushion development	6/256	52/23012	2.37057242656603e-05	0.000478934	0.000334814	Nos3/Acvrl1/Hey1/Tmem100/Eng/Tbx3	6
GO:0007266	BP	GO:0007266	Rho protein signal transduction	9/256	138/23012	2.49584624419977e-05	0.000501488	0.000350581	Ripor2/Rhoj/Cdh13/Dlc1/Ntn1/Cdc42ep1/Rasip1/Apoe/Pecam1	9
GO:0090023	BP	GO:0090023	positive regulation of neutrophil chemotaxis	5/256	32/23012	2.5809945368678e-05	0.000515778	0.000360571	Edn1/Ripor2/Cd74/Cxcr2/Il1b	5
GO:0007264	BP	GO:0007264	small GTPase mediated signal transduction	16/256	427/23012	2.60363185342783e-05	0.000516639	0.000361173	Ripor2/Dock9/Rhoj/Rasgrp3/Cdh13/Dlc1/Ntn1/Cdc42ep1/Aif1/Kitl/Csf1/Rasa4/Dab2ip/Rasip1/Apoe/Pecam1	16
GO:1990138	BP	GO:1990138	neuron projection extension	11/256	211/23012	2.61340136773194e-05	0.000516639	0.000361173	Edn1/Sema3f/Sema3g/Vegfa/Sema6a/Csf1r/Sema3c/Ntn1/Cxcl12/Mapt/Apoe	11
GO:0010563	BP	GO:0010563	negative regulation of phosphorus metabolic process	16/256	429/23012	2.75467889733915e-05	0.000537549	0.000375791	Ppm1f/Cav1/Nlrp12/Gstp1/Snca/Pard3/Mapt/Ptprb/Dab2ip/Hexim1/Rasip1/Ppp1r16b/Apoe/Eng/Pecam1/Il1b	16
GO:0045936	BP	GO:0045936	negative regulation of phosphate metabolic process	16/256	429/23012	2.75467889733915e-05	0.000537549	0.000375791	Ppm1f/Cav1/Nlrp12/Gstp1/Snca/Pard3/Mapt/Ptprb/Dab2ip/Hexim1/Rasip1/Ppp1r16b/Apoe/Eng/Pecam1/Il1b	16
GO:0071559	BP	GO:0071559	response to transforming growth factor beta	12/256	252/23012	2.76303276233383e-05	0.000537549	0.000375791	Ptprk/Cav2/Cav1/Ltbp1/Fermt2/Cdh5/Nos3/Gcnt2/Acvrl1/Chst11/Smad6/Eng	12
GO:0050768	BP	GO:0050768	negative regulation of neurogenesis	10/256	175/23012	2.79259649579499e-05	0.000540441	0.000377813	Fas/Id1/Sema3f/Sema3g/Sema6a/Sema3c/Ntn1/Gata2/Cit/Il1b	10
GO:0045123	BP	GO:0045123	cellular extravasation	7/256	79/23012	2.84703836602715e-05	0.000548092	0.000383162	Ripor2/Lyve1/Jam2/Plvap/Cxcl12/Selp/Pecam1	7
GO:0051494	BP	GO:0051494	negative regulation of cytoskeleton organization	10/256	176/23012	2.93229249863637e-05	0.000561565	0.00039258	Phldb2/Tjp1/Shank3/Sptbn1/Stmn2/Snca/Cdh5/Dlc1/S1pr1/Pecam1	10
GO:0030947	BP	GO:0030947	regulation of vascular endothelial growth factor receptor signaling pathway	5/256	33/23012	3.01440447401728e-05	0.000568408	0.000397364	Epn2/Tek/Mmrn2/Tmem204/Dab2ip	5
GO:0050999	BP	GO:0050999	regulation of nitric-oxide synthase activity	5/256	33/23012	3.01440447401728e-05	0.000568408	0.000397364	Npr3/Cav1/Apoe/Eng/Il1b	5
GO:2000352	BP	GO:2000352	negative regulation of endothelial cell apoptotic process	5/256	33/23012	3.01440447401728e-05	0.000568408	0.000397364	Id1/Ramp2/Tek/Cdh5/Gata2	5
GO:0001933	BP	GO:0001933	negative regulation of protein phosphorylation	14/256	341/23012	3.11882148195942e-05	0.000585097	0.000409031	Ppm1f/Cav1/Nlrp12/Gstp1/Snca/Pard3/Ptprb/Dab2ip/Hexim1/Rasip1/Apoe/Eng/Pecam1/Il1b	14
GO:2000047	BP	GO:2000047	regulation of cell-cell adhesion mediated by cadherin	4/256	17/23012	3.17701828852438e-05	0.00059299	0.000414549	Ppm1f/Tjp1/Bmp6/Vegfa	4
GO:0003176	BP	GO:0003176	aortic valve development	5/256	34/23012	3.5022079628108e-05	0.000647117	0.000452388	Tie1/Nos3/Hey1/Eln/Smad6	5
GO:0071624	BP	GO:0071624	positive regulation of granulocyte chemotaxis	5/256	34/23012	3.5022079628108e-05	0.000647117	0.000452388	Edn1/Ripor2/Cd74/Cxcr2/Il1b	5
GO:0043087	BP	GO:0043087	regulation of GTPase activity	14/256	345/23012	3.54170668529694e-05	0.000647903	0.000452938	Ripor2/Dock9/Cav2/Rasgrp3/Arap3/Fermt2/Adap2/Arhgef15/S1pr1/Arhgap29/Rasa4/Dab2ip/Rasip1/Pecam1	14
GO:0051146	BP	GO:0051146	striated muscle cell differentiation	14/256	345/23012	3.54170668529694e-05	0.000647903	0.000452938	Myh11/Edn1/Ripor2/Cav2/Homer1/Vegfa/Csf1r/Efnb2/Cxcl12/Cxcl10/Igfbp5/Myl2/Tbx3/Actc1	14
GO:0072132	BP	GO:0072132	mesenchyme morphogenesis	6/256	56/23012	3.64285093546564e-05	0.000663107	0.000463567	Nos3/Acvrl1/Hey1/Tmem100/Eng/Tbx3	6
GO:0048732	BP	GO:0048732	gland development	17/256	489/23012	3.75319745598127e-05	0.000679828	0.000475256	Edn1/Csmd1/Cav1/Vwf/Nfib/Vegfa/Sema3c/Scd1/Ntn1/Mafb/Areg/Mki67/Igfbp5/Csf1/Gata2/Lama5/Tbx3	17
GO:0031345	BP	GO:0031345	negative regulation of cell projection organization	11/256	220/23012	3.83267179276722e-05	0.00069082	0.00048294	Id1/Sema3f/Stmn2/Sema3g/Sema6a/Sema3c/Efnb2/Ptprg/Ntn1/Cit/Apoe	11
GO:0050886	BP	GO:0050886	endocrine process	8/256	113/23012	3.93395004495708e-05	0.000702191	0.000490889	Edn1/Bmp6/Aqp1/Nos3/Retn/Ece1/Tbx3/Il1b	8
GO:0110020	BP	GO:0110020	regulation of actomyosin structure organization	8/256	113/23012	3.93395004495708e-05	0.000702191	0.000490889	Edn1/Ppm1f/Phldb2/Tjp1/Fermt2/Dlc1/Arhgef15/S1pr1	8
GO:0015669	BP	GO:0015669	gas transport	4/256	18/23012	4.04910332730221e-05	0.000719254	0.000502818	Hba-a1/Aqp1/Bpgm/Hbb-b1	4
GO:0051961	BP	GO:0051961	negative regulation of nervous system development	10/256	183/23012	4.0885065846844e-05	0.000722761	0.00050527	Fas/Id1/Sema3f/Sema3g/Sema6a/Sema3c/Ntn1/Gata2/Cit/Il1b	10
GO:0045926	BP	GO:0045926	negative regulation of growth	12/256	263/23012	4.19070598651224e-05	0.000737284	0.000515422	Sema3f/Nkd1/Sema3g/Gng4/Sema6a/Sema3c/Lgmn/Ntn1/Acvrl1/Igfbp5/Dab2ip/Myl2	12
GO:0009880	BP	GO:0009880	embryonic pattern specification	7/256	84/23012	4.24371336350853e-05	0.000743054	0.000519456	Sema3f/Efnb1/Stil/Smad6/Meis2/Lama5/Tbx3	7
GO:0072001	BP	GO:0072001	renal system development	14/256	351/23012	4.27034319122417e-05	0.000744173	0.000520238	Bmp6/Aqp1/Gsta3/Nid1/Tns2/Vegfa/Tek/Efnb2/Col4a1/Cenpf/Hey1/Smad6/Cxcr2/Lama5	14
GO:0050730	BP	GO:0050730	regulation of peptidyl-tyrosine phosphorylation	12/256	264/23012	4.34759818748141e-05	0.000754062	0.000527152	Bmp6/Cav2/Cav1/Tspan9/Kit/Cd74/Vegfa/Csf1r/Areg/Kitl/Ghr/Pecam1	12
GO:0050922	BP	GO:0050922	negative regulation of chemotaxis	6/256	58/23012	4.45770749494925e-05	0.00076953	0.000537965	Sema3f/Sema3g/Gstp1/Sema6a/Sema3c/Aif1	6
GO:0019221	BP	GO:0019221	cytokine-mediated signaling pathway	16/256	449/23012	4.74929615348664e-05	0.000816036	0.000570476	Edn1/Cav1/Kit/Cd74/Csf1r/Iigp1/Ackr3/Plvap/Cxcl12/Cxcl15/Cxcl10/Ghr/Csf1/Il1rl1/Cxcr2/Il1b	16
GO:0030857	BP	GO:0030857	negative regulation of epithelial cell differentiation	6/256	59/23012	4.91653593937416e-05	0.000840842	0.000587818	Id1/Cav1/Vegfa/Csf1r/Acvrl1/Tbx3	6
GO:0030038	BP	GO:0030038	contractile actin filament bundle assembly	8/256	117/23012	5.04633029148367e-05	0.000855086	0.000597775	Ppm1f/Phldb2/Tjp1/Fermt2/Dlc1/Arhgef15/S1pr1/Eln	8
GO:0043149	BP	GO:0043149	stress fiber assembly	8/256	117/23012	5.04633029148367e-05	0.000855086	0.000597775	Ppm1f/Phldb2/Tjp1/Fermt2/Dlc1/Arhgef15/S1pr1/Eln	8
GO:0052548	BP	GO:0052548	regulation of endopeptidase activity	14/256	357/23012	5.12710220017158e-05	0.000864787	0.000604557	Ppm1f/Fas/Sox7/Timp3/Serpinb6b/Nlrp12/Aqp1/Acer2/Vegfa/Lgmn/Snca/Tnfsf10/Serpinh1/Dlc1	14
GO:0003206	BP	GO:0003206	cardiac chamber morphogenesis	9/256	152/23012	5.33687232923822e-05	0.000888315	0.000621005	Ccm2l/Tek/Sema3c/Nos3/Hey1/Smad6/Myl2/Eng/Tbx3	9
GO:0014912	BP	GO:0014912	negative regulation of smooth muscle cell migration	5/256	37/23012	5.33906835156062e-05	0.000888315	0.000621005	Cav1/Gstp1/Aif1/Igfbp5/Egfl7	5
GO:0061384	BP	GO:0061384	heart trabecula morphogenesis	5/256	37/23012	5.33906835156062e-05	0.000888315	0.000621005	Ccm2l/Tek/S1pr1/Hey1/Eng	5
GO:0030225	BP	GO:0030225	macrophage differentiation	6/256	60/23012	5.41238829164711e-05	0.000896457	0.000626698	Vegfa/C1qc/Csf1r/Csf1/Il1rl1/Gata2	6
GO:0140962	BP	GO:0140962	multicellular organismal-level chemical homeostasis	7/256	88/23012	5.72796167387969e-05	0.000944472	0.000660264	Hfe/Bmp6/Adgrf5/Aqp1/Vegfa/Epas1/Slc40a1	7
GO:0043491	BP	GO:0043491	phosphatidylinositol 3-kinase/protein kinase B signal transduction	13/256	316/23012	5.8582118992283e-05	0.000961636	0.000672263	Edn1/Vegfa/Tek/Csf1r/Fermt2/Gcnt2/Cxcl12/Igfbp5/Tmem100/Selp/Dab2ip/Ppp1r16b/Eng	13
GO:0003231	BP	GO:0003231	cardiac ventricle development	9/256	154/23012	5.90773141651649e-05	0.000965455	0.000674932	Ccm2l/Ltbp1/Sema3c/Nos3/Hey1/Smad6/Myl2/Eng/Tbx3	9
GO:0043405	BP	GO:0043405	regulation of MAP kinase activity	10/256	193/23012	6.40228797476016e-05	0.00104165	0.000728197	Edn1/Cav1/Kit/Gstp1/Vegfa/Kitl/Ghr/Dab2ip/Apoe/Il1b	10
GO:0018108	BP	GO:0018108	peptidyl-tyrosine phosphorylation	13/256	320/23012	6.65500167595856e-05	0.00107799	0.000753606	Bmp6/Cav2/Cav1/Tspan9/Kit/Cd74/Vegfa/Tek/Csf1r/Areg/Kitl/Ghr/Pecam1	13
GO:1902106	BP	GO:1902106	negative regulation of leukocyte differentiation	8/256	122/23012	6.79398286872584e-05	0.00109568	0.00076597	Tmem176b/Tmem176a/Cd74/C1qc/Fgl2/Mafb/Tbx21/Gata2	8
GO:0035909	BP	GO:0035909	aorta morphogenesis	5/256	39/23012	6.92545712500631e-05	0.00111087	0.00077659	Efnb2/Acvrl1/Hey1/Ephb4/Eng	5
GO:0055001	BP	GO:0055001	muscle cell development	11/256	235/23012	6.95667108441658e-05	0.00111087	0.00077659	Myh11/Edn1/Cav2/Homer1/Vegfa/Ramp2/Smad6/Myl2/Eng/Tbx3/Actc1	11
GO:0051495	BP	GO:0051495	positive regulation of cytoskeleton organization	10/256	195/23012	6.97881558836955e-05	0.00111087	0.00077659	Edn1/Ppm1f/Id1/Cav1/Stmn2/Fermt2/Arhgef15/Cdc42ep1/Mapt/Stil	10
GO:0018212	BP	GO:0018212	peptidyl-tyrosine modification	13/256	322/23012	7.08753903215411e-05	0.00112331	0.000785289	Bmp6/Cav2/Cav1/Tspan9/Kit/Cd74/Vegfa/Tek/Csf1r/Areg/Kitl/Ghr/Pecam1	13
GO:0007163	BP	GO:0007163	establishment or maintenance of cell polarity	11/256	236/23012	7.22619414786131e-05	0.00114037	0.000797216	Phldb2/Ripor2/Prickle2/Rhoj/Amotl1/Aqp1/Tek/Amotl2/Cdh5/Pard3/Hey1	11
GO:0035051	BP	GO:0035051	cardiocyte differentiation	10/256	197/23012	7.59889393317522e-05	0.00119407	0.00083475	Myh11/Edn1/Vegfa/Sema3c/Efnb2/Sox18/Smad6/Myl2/Tbx3/Actc1	10
GO:2000116	BP	GO:2000116	regulation of cysteine-type endopeptidase activity	11/256	238/23012	7.79217504020319e-05	0.00121178	0.000847131	Ppm1f/Fas/Sox7/Nlrp12/Aqp1/Acer2/Vegfa/Lgmn/Snca/Tnfsf10/Dlc1	11
GO:0032232	BP	GO:0032232	negative regulation of actin filament bundle assembly	5/256	40/23012	7.84342324628403e-05	0.00121178	0.000847131	Phldb2/Tjp1/Shank3/Dlc1/S1pr1	5
GO:0090022	BP	GO:0090022	regulation of neutrophil chemotaxis	5/256	40/23012	7.84342324628403e-05	0.00121178	0.000847131	Edn1/Ripor2/Cd74/Cxcr2/Il1b	5
GO:1905314	BP	GO:1905314	semi-lunar valve development	5/256	40/23012	7.84342324628403e-05	0.00121178	0.000847131	Tie1/Nos3/Hey1/Eln/Smad6	5
GO:0048863	BP	GO:0048863	stem cell differentiation	12/256	283/23012	8.46046611062452e-05	0.00129621	0.00090616	Edn1/Sema3f/Kit/Sema3g/Efnb1/Tcof1/Sema6a/Sema3c/Sox18/Kitl/Lama5/Tbx3	12
GO:0051258	BP	GO:0051258	protein polymerization	12/256	283/23012	8.46046611062452e-05	0.00129621	0.00090616	Esam/Cav1/Sptbn1/Stmn2/Snca/Cdh5/Cdc42ep1/Mapt/Aif1/Diaph3/Eln/Pecam1	12
GO:0031400	BP	GO:0031400	negative regulation of protein modification process	16/256	472/23012	8.53361159907589e-05	0.001302	0.000910202	Ppm1f/Cav1/Nlrp12/Gstp1/Snca/Pard3/Mapt/Ptprb/Dab2ip/Hexim1/Rasip1/Ppp1r16b/Apoe/Eng/Pecam1/Il1b	16
GO:0045667	BP	GO:0045667	regulation of osteoblast differentiation	9/256	162/23012	8.73361500207625e-05	0.001327	0.000927685	Id1/Bmp6/Hdac7/Vegfa/Fermt2/Areg/Hey1/Igfbp5/Smad6	9
GO:0060603	BP	GO:0060603	mammary gland duct morphogenesis	5/256	41/23012	8.85224114254189e-05	0.00133949	0.000936416	Csmd1/Ntn1/Areg/Csf1/Tbx3	5
GO:0071902	BP	GO:0071902	positive regulation of protein serine/threonine kinase activity	10/256	201/23012	8.98035465170883e-05	0.00135331	0.000946075	Edn1/Kit/Vegfa/Fermt2/Snca/Kitl/Ghr/Stil/Dab2ip/Il1b	10
GO:0001954	BP	GO:0001954	positive regulation of cell-matrix adhesion	6/256	66/23012	9.29138119905635e-05	0.00139136	0.000972677	Ppm1f/Cdh13/Vegfa/Tek/Fermt2/Csf1	6
GO:0002693	BP	GO:0002693	positive regulation of cellular extravasation	4/256	22/23012	9.34638418609755e-05	0.00139136	0.000972677	Ripor2/Lyve1/Plvap/Pecam1	4
GO:0010039	BP	GO:0010039	response to iron ion	4/256	22/23012	9.34638418609755e-05	0.00139136	0.000972677	Hfe/Bmp6/Snca/Slc40a1	4
GO:1903707	BP	GO:1903707	negative regulation of hemopoiesis	8/256	128/23012	9.52754480149875e-05	0.00141261	0.000987532	Tmem176b/Tmem176a/Cd74/C1qc/Fgl2/Mafb/Tbx21/Gata2	8
GO:0010977	BP	GO:0010977	negative regulation of neuron projection development	9/256	165/23012	0.000100513	0.00148428	0.00103764	Sema3f/Stmn2/Sema3g/Sema6a/Sema3c/Efnb2/Ptprg/Ntn1/Apoe	9
GO:0001822	BP	GO:0001822	kidney development	13/256	335/23012	0.000105409	0.00154772	0.00108199	Bmp6/Aqp1/Gsta3/Nid1/Tns2/Vegfa/Tek/Efnb2/Cenpf/Hey1/Smad6/Cxcr2/Lama5	13
GO:0003279	BP	GO:0003279	cardiac septum development	8/256	130/23012	0.000106194	0.00154772	0.00108199	Ltbp1/Ndst1/Sema3c/Nos3/Hey1/Smad6/Eng/Tbx3	8
GO:0071675	BP	GO:0071675	regulation of mononuclear cell migration	8/256	130/23012	0.000106194	0.00154772	0.00108199	Ripor2/Csf1r/Lgmn/Jam2/Cxcl12/Aif1/Cxcl10/Csf1	8
GO:0061515	BP	GO:0061515	myeloid cell development	7/256	97/23012	0.000106493	0.00154772	0.00108199	Kit/Hba-a1/Hba-a2/Adgrf5/Csf1r/Bpgm/Hbb-b1	7
GO:0007179	BP	GO:0007179	transforming growth factor beta receptor signaling pathway	10/256	206/23012	0.000110016	0.00158638	0.00110901	Ptprk/Cav2/Ltbp1/Fermt2/Cdh5/Gcnt2/Acvrl1/Chst11/Smad6/Eng	10
GO:0032271	BP	GO:0032271	regulation of protein polymerization	10/256	206/23012	0.000110016	0.00158638	0.00110901	Esam/Cav1/Sptbn1/Stmn2/Snca/Cdh5/Cdc42ep1/Mapt/Eln/Pecam1	10
GO:0050919	BP	GO:0050919	negative chemotaxis	5/256	43/23012	0.000111666	0.00160389	0.00112125	Sema3f/Sema3g/Sema6a/Sema3c/Ntn1	5
GO:1900746	BP	GO:1900746	regulation of vascular endothelial growth factor signaling pathway	4/256	23/23012	0.000112155	0.00160465	0.00112178	Jcad/Vegfa/Sema6a/Dab2ip	4
GO:0030509	BP	GO:0030509	BMP signaling pathway	9/256	168/23012	0.000115318	0.0016435	0.00114894	Hfe/Id1/Bmp6/Cav1/Cdh5/Acvrl1/Tmem100/Smad6/Eng	9
GO:1990266	BP	GO:1990266	neutrophil migration	8/256	132/23012	0.000118129	0.00167706	0.0011724	Edn1/Ripor2/Cd74/Cxcl15/Cxcl10/Cxcr2/Pecam1/Il1b	8
GO:0051492	BP	GO:0051492	regulation of stress fiber assembly	7/256	99/23012	0.000121111	0.00171278	0.00119738	Ppm1f/Phldb2/Tjp1/Fermt2/Dlc1/Arhgef15/S1pr1	7
GO:0035886	BP	GO:0035886	vascular associated smooth muscle cell differentiation	5/256	44/23012	0.000124847	0.00175886	0.00122959	Kit/Vegfa/Ramp2/Smad6/Eng	5
GO:0030100	BP	GO:0030100	regulation of endocytosis	13/256	341/23012	0.000125727	0.0017645	0.00123353	Hfe/Ston1/Cav1/Cdh13/Epn2/Vegfa/Efnb2/Snca/Pard3/Sftpa1/Gata2/Apoe/Il1b	13
GO:0043281	BP	GO:0043281	regulation of cysteine-type endopeptidase activity involved in apoptotic process	10/256	210/23012	0.000128842	0.00180133	0.00125928	Ppm1f/Fas/Sox7/Nlrp12/Aqp1/Acer2/Vegfa/Snca/Tnfsf10/Dlc1	10
GO:0010717	BP	GO:0010717	regulation of epithelial to mesenchymal transition	7/256	101/23012	0.000137317	0.00191256	0.00133703	Phldb2/Vegfa/Fermt2/Gcnt2/Dab2ip/Eng/Il1b	7
GO:0085029	BP	GO:0085029	extracellular matrix assembly	5/256	45/23012	0.000139188	0.00192403	0.00134506	Myh11/Phldb2/Ramp2/Tie1/Eln	5
GO:1902624	BP	GO:1902624	positive regulation of neutrophil migration	5/256	45/23012	0.000139188	0.00192403	0.00134506	Edn1/Ripor2/Cd74/Cxcr2/Il1b	5
GO:0008347	BP	GO:0008347	glial cell migration	6/256	71/23012	0.000139833	0.00192571	0.00134623	Hexb/Fas/Ntn1/Csf1/Ptprb/Dab2ip	6
GO:0031334	BP	GO:0031334	positive regulation of protein-containing complex assembly	10/256	213/23012	0.000144686	0.00198511	0.00138776	Fas/Cav1/Vegfa/Fermt2/Snca/Cdh5/Cdc42ep1/Mapt/Dab2ip/Rasip1	10
GO:0043583	BP	GO:0043583	ear development	11/256	257/23012	0.000153484	0.002098	0.00146668	Edn1/Ripor2/Gsdme/Clic5/C1qb/Ntn1/Mafb/Hey1/Ece1/Gata2/Tbx3	11
GO:0035907	BP	GO:0035907	dorsal aorta development	3/256	10/23012	0.000154118	0.00209886	0.00146728	Acvrl1/Hey1/Eng	3
GO:1902547	BP	GO:1902547	regulation of cellular response to vascular endothelial growth factor stimulus	4/256	25/23012	0.000157445	0.00213625	0.00149341	Jcad/Vegfa/Sema6a/Dab2ip	4
GO:0055008	BP	GO:0055008	cardiac muscle tissue morphogenesis	6/256	73/23012	0.000163158	0.00220563	0.00154192	Ccm2l/S1pr1/Hey1/Myl2/Eng/Actc1	6
GO:0030593	BP	GO:0030593	neutrophil chemotaxis	7/256	105/23012	0.00017501	0.00235718	0.00164787	Edn1/Ripor2/Cd74/Cxcl15/Cxcl10/Cxcr2/Il1b	7
GO:0010633	BP	GO:0010633	negative regulation of epithelial cell migration	6/256	74/23012	0.000175919	0.00236079	0.00165038	Ptprm/Mmrn2/Ptprg/Acvrl1/Dab2ip/Apoe	6
GO:0052547	BP	GO:0052547	regulation of peptidase activity	15/256	453/23012	0.000182925	0.00244587	0.00170987	Ppm1f/Fas/Sox7/Timp3/Serpinb6b/Cav1/Nlrp12/Aqp1/Acer2/Vegfa/Lgmn/Snca/Tnfsf10/Serpinh1/Dlc1	15
GO:0050927	BP	GO:0050927	positive regulation of positive chemotaxis	4/256	26/23012	0.000184452	0.00244848	0.00171169	Cdh13/Vegfa/Cxcl12/S1pr1	4
GO:0150146	BP	GO:0150146	cell junction disassembly	4/256	26/23012	0.000184452	0.00244848	0.00171169	Ston1/C1qb/C1qc/C1qa	4
GO:0001776	BP	GO:0001776	leukocyte homeostasis	8/256	141/23012	0.000186402	0.00246547	0.00172357	Fas/Tspan9/Cd74/Csf1r/Kitl/Csf1/Slc40a1/Cxcr2	8
GO:0051896	BP	GO:0051896	regulation of phosphatidylinositol 3-kinase/protein kinase B signal transduction	11/256	263/23012	0.000187586	0.00247224	0.0017283	Vegfa/Tek/Csf1r/Fermt2/Gcnt2/Cxcl12/Igfbp5/Selp/Dab2ip/Ppp1r16b/Eng	11
GO:0048638	BP	GO:0048638	regulation of developmental growth	14/256	404/23012	0.000188265	0.00247233	0.00172836	Edn1/Sema3f/Nkd1/Sema3g/Vegfa/Sema6a/Sema3c/Lgmn/Ntn1/Cxcl12/Mapt/Ghr/Csf1/Apoe	14
GO:0048821	BP	GO:0048821	erythrocyte development	5/256	48/23012	0.000189851	0.00248428	0.00173671	Hba-a1/Hba-a2/Adgrf5/Bpgm/Hbb-b1	5
GO:0071772	BP	GO:0071772	response to BMP	9/256	180/23012	0.000194082	0.0025217	0.00176288	Hfe/Id1/Bmp6/Cav1/Cdh5/Acvrl1/Tmem100/Smad6/Eng	9
GO:0071773	BP	GO:0071773	cellular response to BMP stimulus	9/256	180/23012	0.000194082	0.0025217	0.00176288	Hfe/Id1/Bmp6/Cav1/Cdh5/Acvrl1/Tmem100/Smad6/Eng	9
GO:0071901	BP	GO:0071901	negative regulation of protein serine/threonine kinase activity	7/256	107/23012	0.000196769	0.0025476	0.00178098	Cav1/Gstp1/Dab2ip/Hexim1/Rasip1/Apoe/Il1b	7
GO:0001558	BP	GO:0001558	regulation of cell growth	15/256	458/23012	0.000205859	0.00265594	0.00185672	Edn1/Sema3f/Sema3g/Gng4/Vegfa/Sema6a/Sema3c/Ntn1/Cxcl12/Acvrl1/Mapt/Igfbp5/Dab2ip/Myl2/Apoe	15
GO:0030517	BP	GO:0030517	negative regulation of axon extension	5/256	49/23012	0.000209522	0.00265631	0.00185698	Sema3f/Sema3g/Sema6a/Sema3c/Ntn1	5
GO:0033673	BP	GO:0033673	negative regulation of kinase activity	10/256	223/23012	0.000209888	0.00265631	0.00185698	Ppm1f/Cav1/Gstp1/Mapt/Ptprb/Dab2ip/Hexim1/Rasip1/Apoe/Il1b	10
GO:0045602	BP	GO:0045602	negative regulation of endothelial cell differentiation	3/256	11/23012	0.000210171	0.00265631	0.00185698	Id1/Vegfa/Acvrl1	3
GO:0045603	BP	GO:0045603	positive regulation of endothelial cell differentiation	3/256	11/23012	0.000210171	0.00265631	0.00185698	Bmp6/Acvrl1/Tmem100	3
GO:0061299	BP	GO:0061299	retina vasculature morphogenesis in camera-type eye	3/256	11/23012	0.000210171	0.00265631	0.00185698	Rhoj/Col4a1/Arhgef15	3
GO:0070663	BP	GO:0070663	regulation of leukocyte proliferation	12/256	312/23012	0.000210222	0.00265631	0.00185698	Ripor2/H2-Aa/Kit/Efnb1/Gstp1/Cd74/Csf1r/H2-Q10/Aif1/Kitl/Csf1/Il1b	12
GO:0033622	BP	GO:0033622	integrin activation	4/256	27/23012	0.000214648	0.00267473	0.00186986	Fermt2/Cxcl12/Selp/Rasip1	4
GO:0048843	BP	GO:0048843	negative regulation of axon extension involved in axon guidance	4/256	27/23012	0.000214648	0.00267473	0.00186986	Sema3f/Sema3g/Sema6a/Sema3c	4
GO:0050926	BP	GO:0050926	regulation of positive chemotaxis	4/256	27/23012	0.000214648	0.00267473	0.00186986	Cdh13/Vegfa/Cxcl12/S1pr1	4
GO:0051354	BP	GO:0051354	negative regulation of oxidoreductase activity	4/256	27/23012	0.000214648	0.00267473	0.00186986	Cav1/Gstp1/Snca/Eng	4
GO:0008360	BP	GO:0008360	regulation of cell shape	8/256	144/23012	0.000215317	0.00267473	0.00186986	Hexb/Rhoj/Kit/Vegfa/Csf1r/Fermt2/Dlc1/Cdc42ep1	8
GO:1902905	BP	GO:1902905	positive regulation of supramolecular fiber organization	9/256	183/23012	0.00021957	0.00271839	0.00190038	Edn1/Ppm1f/Id1/Cav1/Stmn2/Fermt2/Arhgef15/Cdc42ep1/Mapt	9
GO:0016525	BP	GO:0016525	negative regulation of angiogenesis	7/256	109/23012	0.000220661	0.00272272	0.00190341	Ptprm/Epn2/Sema6a/Tek/Tie1/Cxcl10/Dab2ip	7
GO:0045860	BP	GO:0045860	positive regulation of protein kinase activity	13/256	363/23012	0.000231815	0.00285078	0.00199293	Edn1/Kit/Cenpe/Vegfa/Csf1r/Fermt2/Snca/Kitl/Ghr/Csf1/Stil/Dab2ip/Il1b	13
GO:0072676	BP	GO:0072676	lymphocyte migration	7/256	110/23012	0.000233455	0.00286138	0.00200034	Ripor2/Jam2/Cxcl12/Aif1/S1pr1/Cxcl10/Tbx21	7
GO:2000181	BP	GO:2000181	negative regulation of blood vessel morphogenesis	7/256	111/23012	0.00024684	0.00297328	0.00207857	Ptprm/Epn2/Sema6a/Tek/Tie1/Cxcl10/Dab2ip	7
GO:0035296	BP	GO:0035296	regulation of tube diameter	9/256	186/23012	0.00024778	0.00297328	0.00207857	Edn1/Npr3/Ptprm/Cav1/Vegfa/Nos3/Ece1/Smad6/Apoe	9
GO:0050770	BP	GO:0050770	regulation of axonogenesis	9/256	186/23012	0.00024778	0.00297328	0.00207857	Sema3f/Sema3g/Vegfa/Sema6a/Sema3c/Ntn1/Cxcl12/Mapt/Apoe	9
GO:0097746	BP	GO:0097746	blood vessel diameter maintenance	9/256	186/23012	0.00024778	0.00297328	0.00207857	Edn1/Npr3/Ptprm/Cav1/Vegfa/Nos3/Ece1/Smad6/Apoe	9
GO:2001056	BP	GO:2001056	positive regulation of cysteine-type endopeptidase activity	8/256	147/23012	0.000247813	0.00297328	0.00207857	Ppm1f/Fas/Sox7/Acer2/Lgmn/Snca/Tnfsf10/Dlc1	8
GO:0003272	BP	GO:0003272	endocardial cushion formation	4/256	28/23012	0.000248245	0.00297328	0.00207857	Hey1/Tmem100/Eng/Tbx3	4
GO:0090026	BP	GO:0090026	positive regulation of monocyte chemotaxis	4/256	28/23012	0.000248245	0.00297328	0.00207857	Lgmn/Cxcl12/Aif1/Cxcl10	4
GO:1990868	BP	GO:1990868	response to chemokine	6/256	79/23012	0.000252037	0.00299916	0.00209666	Edn1/Ripor2/Ackr3/Cxcl12/Cxcl15/Cxcl10	6
GO:1990869	BP	GO:1990869	cellular response to chemokine	6/256	79/23012	0.000252037	0.00299916	0.00209666	Edn1/Ripor2/Ackr3/Cxcl12/Cxcl15/Cxcl10	6
GO:0010038	BP	GO:0010038	response to metal ion	12/256	319/23012	0.000257492	0.00304832	0.00213102	Hfe/Fas/Bmp6/Cav1/Aqp1/Homer1/Lgmn/Snca/Mapt/Slc40a1/Rasa4/S100a16	12
GO:0035150	BP	GO:0035150	regulation of tube size	9/256	187/23012	0.000257826	0.00304832	0.00213102	Edn1/Npr3/Ptprm/Cav1/Vegfa/Nos3/Ece1/Smad6/Apoe	9
GO:1901343	BP	GO:1901343	negative regulation of vasculature development	7/256	112/23012	0.000260835	0.00307401	0.00214899	Ptprm/Epn2/Sema6a/Tek/Tie1/Cxcl10/Dab2ip	7
GO:0030948	BP	GO:0030948	negative regulation of vascular endothelial growth factor receptor signaling pathway	3/256	12/23012	0.000277927	0.00324177	0.00226626	Epn2/Mmrn2/Dab2ip	3
GO:0071281	BP	GO:0071281	cellular response to iron ion	3/256	12/23012	0.000277927	0.00324177	0.00226626	Hfe/Bmp6/Slc40a1	3
GO:0001666	BP	GO:0001666	response to hypoxia	10/256	231/23012	0.000278396	0.00324177	0.00226626	Egln3/Edn1/Cav1/Plat/Aqp1/Vegfa/Tek/Epas1/Ece1/Eng	10
GO:0045862	BP	GO:0045862	positive regulation of proteolysis	13/256	370/23012	0.000278659	0.00324177	0.00226626	Ppm1f/Fas/Sox7/Cav1/Acer2/Rnf144a/Lgmn/Snca/Tnfsf10/Dlc1/Dab2ip/Apoe/Il1b	13
GO:0002460	BP	GO:0002460	adaptive immune response based on somatic recombination of immune receptors built from immunoglobulin superfamily domains	14/256	420/23012	0.000279655	0.00324177	0.00226626	Hfe/Fas/Iglc2/Cd74/Vegfa/C1qb/C1qc/C1qa/Fgl2/H2-Q10/Pou2f2/Il1rl1/Tbx21/Il1b	14
GO:0030198	BP	GO:0030198	extracellular matrix organization	12/256	322/23012	0.000280359	0.00324177	0.00226626	Myh11/Phldb2/Cav2/Cav1/Nid1/Ramp2/Tie1/Col4a1/Serpinh1/Hmcn1/Eln/Eng	12
GO:0042744	BP	GO:0042744	hydrogen peroxide catabolic process	4/256	29/23012	0.000285462	0.00328014	0.00229309	Hba-a1/Snca/Hbb-bt/Hbb-b1	4
GO:0060444	BP	GO:0060444	branching involved in mammary gland duct morphogenesis	4/256	29/23012	0.000285462	0.00328014	0.00229309	Csmd1/Areg/Csf1/Tbx3	4
GO:0045229	BP	GO:0045229	external encapsulating structure organization	12/256	323/23012	0.000288356	0.00330306	0.00230911	Myh11/Phldb2/Cav2/Cav1/Nid1/Ramp2/Tie1/Col4a1/Serpinh1/Hmcn1/Eln/Eng	12
GO:0051897	BP	GO:0051897	positive regulation of phosphatidylinositol 3-kinase/protein kinase B signal transduction	9/256	190/23012	0.000290011	0.00331171	0.00231516	Vegfa/Tek/Csf1r/Fermt2/Gcnt2/Cxcl12/Igfbp5/Selp/Eng	9
GO:0043062	BP	GO:0043062	extracellular structure organization	12/256	324/23012	0.000296544	0.00337351	0.00235836	Myh11/Phldb2/Cav2/Cav1/Nid1/Ramp2/Tie1/Col4a1/Serpinh1/Hmcn1/Eln/Eng	12
GO:0031623	BP	GO:0031623	receptor internalization	8/256	151/23012	0.000297285	0.00337351	0.00235836	Cav1/Vegfa/Ramp2/Efnb2/Snca/Pard3/Ackr3/Cxcr2	8
GO:0045637	BP	GO:0045637	regulation of myeloid cell differentiation	10/256	233/23012	0.000298175	0.00337351	0.00235836	Fas/Cd74/C1qc/Csf1r/Rcor1/Mafb/Kitl/Csf1/Meis2/Gata2	10
GO:0070661	BP	GO:0070661	leukocyte proliferation	14/256	423/23012	0.000300478	0.00338913	0.00236928	Ripor2/H2-Aa/Npr3/Kit/Efnb1/Gstp1/Cd74/Csf1r/H2-Q10/Cxcl12/Aif1/Kitl/Csf1/Il1b	14
GO:0006022	BP	GO:0006022	aminoglycan metabolic process	7/256	115/23012	0.000306694	0.00342771	0.00239625	Hexb/Cemip2/Lyve1/Ndst1/Chst11/B3gnt2/Il1b	7
GO:0014909	BP	GO:0014909	smooth muscle cell migration	7/256	115/23012	0.000306694	0.00342771	0.00239625	Cav1/Plat/Gstp1/Retn/Aif1/Igfbp5/Egfl7	7
GO:0048661	BP	GO:0048661	positive regulation of smooth muscle cell proliferation	7/256	115/23012	0.000306694	0.00342771	0.00239625	Edn1/Cdh13/Vegfa/Retn/Aif1/S1pr1/Igfbp5	7
GO:0071677	BP	GO:0071677	positive regulation of mononuclear cell migration	6/256	82/23012	0.000308824	0.00344104	0.00240557	Lgmn/Jam2/Cxcl12/Aif1/Cxcl10/Csf1	6
GO:0048738	BP	GO:0048738	cardiac muscle tissue development	11/256	279/23012	0.000311375	0.00345899	0.00241812	Myh11/Edn1/Ccm2l/Vegfa/Efnb2/S1pr1/Hey1/Myl2/Eng/Tbx3/Actc1	11
GO:1903038	BP	GO:1903038	negative regulation of leukocyte cell-cell adhesion	8/256	153/23012	0.000324886	0.0035839	0.00250544	Hfe/Ripor2/H2-Aa/Gstp1/Cd74/Fgl2/Cxcl12/Tbx21	8
GO:0051894	BP	GO:0051894	positive regulation of focal adhesion assembly	4/256	30/23012	0.000326518	0.0035839	0.00250544	Ppm1f/Vegfa/Tek/Fermt2	4
GO:0061298	BP	GO:0061298	retina vasculature development in camera-type eye	4/256	30/23012	0.000326518	0.0035839	0.00250544	Rhoj/Col4a1/Arhgef15/Acvrl1	4
GO:0061484	BP	GO:0061484	hematopoietic stem cell homeostasis	4/256	30/23012	0.000326518	0.0035839	0.00250544	Emcn/Myct1/Cadps2/Gata2	4
GO:0070373	BP	GO:0070373	negative regulation of ERK1 and ERK2 cascade	6/256	83/23012	0.000329828	0.00360105	0.00251743	Timp3/Cav1/Nlrp12/Gstp1/Sema6a/Dab2ip	6
GO:0070374	BP	GO:0070374	positive regulation of ERK1 and ERK2 cascade	10/256	236/23012	0.000330039	0.00360105	0.00251743	Cd74/Vegfa/Tek/Csf1r/Fermt2/Ackr3/Gcnt2/Cxcl12/Apoe/Il1b	10
GO:0003179	BP	GO:0003179	heart valve morphogenesis	5/256	54/23012	0.000332141	0.00360261	0.00251852	Tie1/Nos3/Hey1/Eln/Smad6	5
GO:0045773	BP	GO:0045773	positive regulation of axon extension	5/256	54/23012	0.000332141	0.00360261	0.00251852	Vegfa/Ntn1/Cxcl12/Mapt/Apoe	5
GO:0006470	BP	GO:0006470	protein dephosphorylation	10/256	237/23012	0.000341273	0.00369076	0.00258015	Ppm1f/Ptprk/Ptprm/Tns2/Ptpn14/Cdh5/Ptprg/Dlc1/Ptprb/Ppp1r16b	10
GO:0150076	BP	GO:0150076	neuroinflammatory response	6/256	84/23012	0.000351935	0.00379491	0.00265295	C1qa/Csf1r/Snca/Bpgm/Aif1/Il1b	6
GO:0030098	BP	GO:0030098	lymphocyte differentiation	15/256	482/23012	0.000353983	0.00380076	0.00265704	Cd83/Fas/Igkc/H2-Aa/Dnajb9/Hdac7/Kit/Cd74/Fgl2/Ctla2a/Mafb/Pou2f2/Sox13/Tbx21/Il1b	15
GO:0072073	BP	GO:0072073	kidney epithelium development	8/256	155/23012	0.000354544	0.00380076	0.00265704	Aqp1/Gsta3/Vegfa/Efnb2/Hey1/Smad6/Cxcr2/Lama5	8
GO:0031953	BP	GO:0031953	negative regulation of protein autophosphorylation	3/256	13/23012	0.000358339	0.00383027	0.00267768	Cav1/Nlrp12/Eng	3
GO:0031113	BP	GO:0031113	regulation of microtubule polymerization	5/256	55/23012	0.000362073	0.00383672	0.00268218	Cav1/Stmn2/Snca/Cdh5/Mapt	5
GO:0046580	BP	GO:0046580	negative regulation of Ras protein signal transduction	5/256	55/23012	0.000362073	0.00383672	0.00268218	Ripor2/Dlc1/Rasa4/Dab2ip/Rasip1	5
GO:0051353	BP	GO:0051353	positive regulation of oxidoreductase activity	5/256	55/23012	0.000362073	0.00383672	0.00268218	Edn1/Npr3/Snca/Apoe/Il1b	5
GO:0060411	BP	GO:0060411	cardiac septum morphogenesis	6/256	85/23012	0.000375185	0.00396424	0.00277133	Sema3c/Nos3/Hey1/Smad6/Eng/Tbx3	6
GO:0019724	BP	GO:0019724	B cell mediated immunity	10/256	240/23012	0.000376904	0.00397099	0.00277605	Fas/Iglc2/Cd74/C1qb/C1qc/C1qa/Fgl2/H2-Q10/Pou2f2/Tbx21	10
GO:0048562	BP	GO:0048562	embryonic organ morphogenesis	12/256	334/23012	0.000389891	0.00409608	0.0028635	Edn1/Ripor2/Aldh1a1/Clic5/Ndst1/Ntn1/Mafb/Chst11/Stil/Gata2/Eng/Tbx3	12
GO:1902622	BP	GO:1902622	regulation of neutrophil migration	5/256	56/23012	0.000393998	0.00412744	0.00288542	Edn1/Ripor2/Cd74/Cxcr2/Il1b	5
GO:0055006	BP	GO:0055006	cardiac cell development	7/256	120/23012	0.000397332	0.00415054	0.00290157	Myh11/Edn1/Vegfa/Smad6/Myl2/Tbx3/Actc1	7
GO:0010639	BP	GO:0010639	negative regulation of organelle organization	13/256	386/23012	0.000416955	0.00433658	0.00303163	Phldb2/Tjp1/Shank3/Top2a/Sptbn1/Cenpe/Stmn2/Snca/Cdh5/Dlc1/Mapt/S1pr1/Pecam1	13
GO:0070507	BP	GO:0070507	regulation of microtubule cytoskeleton organization	8/256	159/23012	0.000420486	0.00433658	0.00303163	Phldb2/Ripor2/Cav1/Stmn2/Snca/Cdh5/Mapt/Stil	8
GO:0035162	BP	GO:0035162	embryonic hemopoiesis	4/256	32/23012	0.000421039	0.00433658	0.00303163	Kit/Vegfa/Kitl/Gata2	4
GO:0060317	BP	GO:0060317	cardiac epithelial to mesenchymal transition	4/256	32/23012	0.000421039	0.00433658	0.00303163	Hey1/Tmem100/Eng/Tbx3	4
GO:0060586	BP	GO:0060586	multicellular organismal-level iron ion homeostasis	4/256	32/23012	0.000421039	0.00433658	0.00303163	Hfe/Bmp6/Epas1/Slc40a1	4
GO:0060415	BP	GO:0060415	muscle tissue morphogenesis	6/256	87/23012	0.000425277	0.004368	0.00305359	Ccm2l/S1pr1/Hey1/Myl2/Eng/Actc1	6
GO:0010596	BP	GO:0010596	negative regulation of endothelial cell migration	5/256	57/23012	0.000428004	0.00438376	0.00306461	Ptprm/Mmrn2/Acvrl1/Dab2ip/Apoe	5
GO:0045807	BP	GO:0045807	positive regulation of endocytosis	9/256	201/23012	0.000437825	0.00445951	0.00311756	Hfe/Cav1/Vegfa/Snca/Pard3/Sftpa1/Gata2/Apoe/Il1b	9
GO:0070665	BP	GO:0070665	positive regulation of leukocyte proliferation	9/256	201/23012	0.000437825	0.00445951	0.00311756	Kit/Efnb1/Cd74/Csf1r/H2-Q10/Aif1/Kitl/Csf1/Il1b	9
GO:0048588	BP	GO:0048588	developmental cell growth	11/256	291/23012	0.000444199	0.00451193	0.00315421	Edn1/Sema3f/Sema3g/Vegfa/Sema6a/Csf1r/Sema3c/Ntn1/Cxcl12/Mapt/Apoe	11
GO:0070830	BP	GO:0070830	bicellular tight junction assembly	6/256	88/23012	0.000452204	0.00454428	0.00317683	Tjp1/Esam/Ramp2/Cdh5/Pard3/Pecam1	6
GO:0015670	BP	GO:0015670	carbon dioxide transport	3/256	14/23012	0.000452327	0.00454428	0.00317683	Hba-a1/Aqp1/Hbb-b1	3
GO:0032769	BP	GO:0032769	negative regulation of monooxygenase activity	3/256	14/23012	0.000452327	0.00454428	0.00317683	Cav1/Snca/Eng	3
GO:0098883	BP	GO:0098883	synapse pruning	3/256	14/23012	0.000452327	0.00454428	0.00317683	C1qb/C1qc/C1qa	3
GO:0006469	BP	GO:0006469	negative regulation of protein kinase activity	9/256	202/23012	0.000453878	0.00454744	0.00317904	Ppm1f/Cav1/Gstp1/Ptprb/Dab2ip/Hexim1/Rasip1/Apoe/Il1b	9
GO:0043407	BP	GO:0043407	negative regulation of MAP kinase activity	5/256	58/23012	0.000464177	0.00462541	0.00323355	Cav1/Gstp1/Dab2ip/Apoe/Il1b	5
GO:0061900	BP	GO:0061900	glial cell activation	5/256	58/23012	0.000464177	0.00462541	0.00323355	C1qa/Csf1r/Snca/Aif1/Il1b	5
GO:0001780	BP	GO:0001780	neutrophil homeostasis	4/256	33/23012	0.000474955	0.0047073	0.00329079	Tspan9/Csf1r/Csf1/Cxcr2	4
GO:0031295	BP	GO:0031295	T cell costimulation	4/256	33/23012	0.000474955	0.0047073	0.00329079	Cav1/Efnb1/Efnb2/Ephb4	4
GO:2000351	BP	GO:2000351	regulation of endothelial cell apoptotic process	5/256	59/23012	0.000502604	0.00496794	0.003473	Id1/Ramp2/Tek/Cdh5/Gata2	5
GO:0030308	BP	GO:0030308	negative regulation of cell growth	9/256	205/23012	0.000504968	0.00497793	0.00347998	Sema3f/Sema3g/Gng4/Sema6a/Sema3c/Ntn1/Acvrl1/Dab2ip/Myl2	9
GO:0030879	BP	GO:0030879	mammary gland development	8/256	164/23012	0.000516585	0.00507884	0.00355053	Csmd1/Cav1/Vegfa/Ntn1/Areg/Igfbp5/Csf1/Tbx3	8
GO:0032602	BP	GO:0032602	chemokine production	7/256	126/23012	0.0005331	0.00519072	0.00362874	Gstp1/Cd74/Csf1r/Aif1/Slamf9/Il1rl1/Il1b	7
GO:0044319	BP	GO:0044319	wound healing, spreading of cells	4/256	34/23012	0.000533613	0.00519072	0.00362874	Phldb2/Fermt2/Pard3/Acvrl1	4
GO:0051497	BP	GO:0051497	negative regulation of stress fiber assembly	4/256	34/23012	0.000533613	0.00519072	0.00362874	Phldb2/Tjp1/Dlc1/S1pr1	4
GO:0090505	BP	GO:0090505	epiboly involved in wound healing	4/256	34/23012	0.000533613	0.00519072	0.00362874	Phldb2/Fermt2/Pard3/Acvrl1	4
GO:0035924	BP	GO:0035924	cellular response to vascular endothelial growth factor stimulus	5/256	60/23012	0.000543374	0.00527174	0.00368538	Jcad/Vegfa/Sema6a/Ramp2/Dab2ip	5
GO:0003198	BP	GO:0003198	epithelial to mesenchymal transition involved in endocardial cushion formation	3/256	15/23012	0.000560773	0.00541197	0.00378342	Hey1/Tmem100/Eng	3
GO:0031115	BP	GO:0031115	negative regulation of microtubule polymerization	3/256	15/23012	0.000560773	0.00541197	0.00378342	Stmn2/Snca/Cdh5	3
GO:0050878	BP	GO:0050878	regulation of body fluid levels	12/256	349/23012	0.000575829	0.00554273	0.00387482	Edn1/Npr3/Cav1/Vwf/Plat/Tspan9/Aqp1/Vegfa/Tspan18/Selp/Thbd/Apoe	12
GO:0010812	BP	GO:0010812	negative regulation of cell-substrate adhesion	5/256	61/23012	0.00058658	0.00563147	0.00393686	Phldb2/Acer2/Dlc1/Gcnt2/Acvrl1	5
GO:0031294	BP	GO:0031294	lymphocyte costimulation	4/256	35/23012	0.000597241	0.00568927	0.00397727	Cav1/Efnb1/Efnb2/Ephb4	4
GO:0090504	BP	GO:0090504	epiboly	4/256	35/23012	0.000597241	0.00568927	0.00397727	Phldb2/Fermt2/Pard3/Acvrl1	4
GO:0150117	BP	GO:0150117	positive regulation of cell-substrate junction organization	4/256	35/23012	0.000597241	0.00568927	0.00397727	Ppm1f/Vegfa/Tek/Fermt2	4
GO:0007009	BP	GO:0007009	plasma membrane organization	8/256	168/23012	0.000605652	0.00573965	0.00401249	Sh3tc2/Cavin2/Cav2/Cav1/Sptbn1/Tie1/Mafb/Prx	8
GO:0010950	BP	GO:0010950	positive regulation of endopeptidase activity	8/256	168/23012	0.000605652	0.00573965	0.00401249	Ppm1f/Fas/Sox7/Acer2/Lgmn/Snca/Tnfsf10/Dlc1	8
GO:0043280	BP	GO:0043280	positive regulation of cysteine-type endopeptidase activity involved in apoptotic process	7/256	129/23012	0.000613597	0.00577032	0.00403393	Ppm1f/Fas/Sox7/Acer2/Snca/Tnfsf10/Dlc1	7
GO:0043406	BP	GO:0043406	positive regulation of MAP kinase activity	7/256	129/23012	0.000613597	0.00577032	0.00403393	Edn1/Kit/Vegfa/Kitl/Ghr/Dab2ip/Il1b	7
GO:0048640	BP	GO:0048640	negative regulation of developmental growth	7/256	129/23012	0.000613597	0.00577032	0.00403393	Sema3f/Nkd1/Sema3g/Sema6a/Sema3c/Lgmn/Ntn1	7
GO:0051058	BP	GO:0051058	negative regulation of small GTPase mediated signal transduction	5/256	62/23012	0.000632311	0.00591605	0.00413581	Ripor2/Dlc1/Rasa4/Dab2ip/Rasip1	5
GO:0072577	BP	GO:0072577	endothelial cell apoptotic process	5/256	62/23012	0.000632311	0.00591605	0.00413581	Id1/Ramp2/Tek/Cdh5/Gata2	5
GO:0014812	BP	GO:0014812	muscle cell migration	7/256	130/23012	0.000642474	0.00596905	0.00417286	Cav1/Plat/Gstp1/Retn/Aif1/Igfbp5/Egfl7	7
GO:0035050	BP	GO:0035050	embryonic heart tube development	6/256	94/23012	0.000642845	0.00596905	0.00417286	Edn1/Sox18/Ece1/Stil/Eng/Tbx3	6
GO:0120192	BP	GO:0120192	tight junction assembly	6/256	94/23012	0.000642845	0.00596905	0.00417286	Tjp1/Esam/Ramp2/Cdh5/Pard3/Pecam1	6
GO:0051348	BP	GO:0051348	negative regulation of transferase activity	10/256	258/23012	0.000661998	0.0061314	0.00428636	Ppm1f/Cav1/Gstp1/Mapt/Ptprb/Dab2ip/Hexim1/Rasip1/Apoe/Il1b	10
GO:0090025	BP	GO:0090025	regulation of monocyte chemotaxis	4/256	36/23012	0.000666072	0.00613821	0.00429112	Lgmn/Cxcl12/Aif1/Cxcl10	4
GO:1901889	BP	GO:1901889	negative regulation of cell junction assembly	4/256	36/23012	0.000666072	0.00613821	0.00429112	Phldb2/Dlc1/Acvrl1/Il1b	4
GO:0048644	BP	GO:0048644	muscle organ morphogenesis	6/256	95/23012	0.00067989	0.00621482	0.00434467	Ccm2l/S1pr1/Hey1/Myl2/Eng/Actc1	6
GO:0032488	BP	GO:0032488	Cdc42 protein signal transduction	3/256	16/23012	0.000684526	0.00621482	0.00434467	Rhoj/Ntn1/Apoe	3
GO:0051895	BP	GO:0051895	negative regulation of focal adhesion assembly	3/256	16/23012	0.000684526	0.00621482	0.00434467	Phldb2/Dlc1/Acvrl1	3
GO:0150118	BP	GO:0150118	negative regulation of cell-substrate junction organization	3/256	16/23012	0.000684526	0.00621482	0.00434467	Phldb2/Dlc1/Acvrl1	3
GO:1902287	BP	GO:1902287	semaphorin-plexin signaling pathway involved in axon guidance	3/256	16/23012	0.000684526	0.00621482	0.00434467	Edn1/Sema3f/Ece1	3
GO:2001212	BP	GO:2001212	regulation of vasculogenesis	3/256	16/23012	0.000684526	0.00621482	0.00434467	Ramp2/Hey1/Tmem100	3
GO:1990845	BP	GO:1990845	adaptive thermogenesis	8/256	173/23012	0.000734017	0.00664591	0.00464604	Npr3/Id1/Cav1/Aldh1a1/Clic5/Vegfa/Scd1/Epas1	8
GO:1902414	BP	GO:1902414	protein localization to cell junction	7/256	133/23012	0.000735623	0.00664591	0.00464604	Tjp1/Homer1/Fermt2/Cdh5/Mapt/Nsg1/Pecam1	7
GO:0001953	BP	GO:0001953	negative regulation of cell-matrix adhesion	4/256	37/23012	0.000740337	0.0066721	0.00466435	Phldb2/Acer2/Dlc1/Acvrl1	4
GO:0036293	BP	GO:0036293	response to decreased oxygen levels	10/256	262/23012	0.000744976	0.0066975	0.00468211	Egln3/Edn1/Cav1/Plat/Aqp1/Vegfa/Tek/Epas1/Ece1/Eng	10
GO:0043297	BP	GO:0043297	apical junction assembly	6/256	97/23012	0.000758924	0.00680625	0.00475813	Tjp1/Esam/Ramp2/Cdh5/Pard3/Pecam1	6
GO:0001921	BP	GO:0001921	positive regulation of receptor recycling	3/256	17/23012	0.000824402	0.00732205	0.00511872	Snca/Ece1/Nsg1	3
GO:0003222	BP	GO:0003222	ventricular trabecula myocardium morphogenesis	3/256	17/23012	0.000824402	0.00732205	0.00511872	Ccm2l/Hey1/Eng	3
GO:0097531	BP	GO:0097531	mast cell migration	3/256	17/23012	0.000824402	0.00732205	0.00511872	Kit/Vegfa/Kitl	3
GO:1902285	BP	GO:1902285	semaphorin-plexin signaling pathway involved in neuron projection guidance	3/256	17/23012	0.000824402	0.00732205	0.00511872	Edn1/Sema3f/Ece1	3
GO:0003170	BP	GO:0003170	heart valve development	5/256	66/23012	0.000842377	0.00744572	0.00520517	Tie1/Nos3/Hey1/Eln/Smad6	5
GO:2000401	BP	GO:2000401	regulation of lymphocyte migration	5/256	66/23012	0.000842377	0.00744572	0.00520517	Ripor2/Jam2/Cxcl12/Aif1/Cxcl10	5
GO:0002367	BP	GO:0002367	cytokine production involved in immune response	8/256	177/23012	0.000851754	0.00751055	0.00525049	Hfe/Kit/Cd74/Tek/H2-Q10/Slamf9/Tbx21/Il1b	8
GO:0007416	BP	GO:0007416	synapse assembly	9/256	221/23012	0.000863525	0.00759613	0.00531032	Negr1/Shank3/Efnb1/Pcdh17/Efnb2/Snca/Ntn1/Arhgef15/Mapt	9
GO:0120193	BP	GO:0120193	tight junction organization	6/256	100/23012	0.000890567	0.00781531	0.00546355	Tjp1/Esam/Ramp2/Cdh5/Pard3/Pecam1	6
GO:0072678	BP	GO:0072678	T cell migration	5/256	67/23012	0.000902156	0.00789816	0.00552147	Ripor2/Cxcl12/Aif1/S1pr1/Cxcl10	5
GO:0002573	BP	GO:0002573	myeloid leukocyte differentiation	10/256	269/23012	0.000910756	0.00795451	0.00556086	Kit/Cd74/Vegfa/C1qc/Csf1r/Mafb/Kitl/Csf1/Il1rl1/Gata2	10
GO:0030203	BP	GO:0030203	glycosaminoglycan metabolic process	6/256	101/23012	0.000938141	0.00817428	0.00571449	Hexb/Cemip2/Lyve1/Ndst1/Chst11/Il1b	6
GO:0048839	BP	GO:0048839	inner ear development	9/256	224/23012	0.000949531	0.00821604	0.00574369	Ripor2/Gsdme/Clic5/C1qb/Ntn1/Mafb/Hey1/Gata2/Tbx3	9
GO:0050866	BP	GO:0050866	negative regulation of cell activation	9/256	224/23012	0.000949531	0.00821604	0.00574369	Hfe/Fas/Ripor2/H2-Aa/Adgrf5/Cd74/Fgl2/Tbx21/Apoe	9
GO:0007599	BP	GO:0007599	hemostasis	8/256	180/23012	0.000949638	0.00821604	0.00574369	Cav1/Vwf/Plat/Tspan9/Tspan18/Selp/Thbd/Apoe	8
GO:0003229	BP	GO:0003229	ventricular cardiac muscle tissue development	5/256	68/23012	0.000965036	0.00832966	0.00582312	Ccm2l/Hey1/Myl2/Eng/Tbx3	5
GO:0070482	BP	GO:0070482	response to oxygen levels	11/256	320/23012	0.000970818	0.00835995	0.00584429	Egln3/Edn1/Fas/Cav1/Plat/Aqp1/Vegfa/Tek/Epas1/Ece1/Eng	11
GO:0033623	BP	GO:0033623	regulation of integrin activation	3/256	18/23012	0.000981185	0.00840983	0.00587916	Fermt2/Selp/Rasip1	3
GO:0070486	BP	GO:0070486	leukocyte aggregation	3/256	18/23012	0.000981185	0.00840983	0.00587916	Gstp1/Jam2/Il1b	3
GO:0010811	BP	GO:0010811	positive regulation of cell-substrate adhesion	7/256	140/23012	0.000994716	0.00850598	0.00594638	Ppm1f/Cdh13/Nid1/Vegfa/Tek/Fermt2/Csf1	7
GO:0030212	BP	GO:0030212	hyaluronan metabolic process	4/256	40/23012	0.00099806	0.00851477	0.00595253	Hexb/Cemip2/Lyve1/Il1b	4
GO:0090596	BP	GO:0090596	sensory organ morphogenesis	11/256	322/23012	0.00102089	0.00868941	0.00607461	Edn1/Ripor2/Ptprm/Aldh1a1/Aqp1/Clic5/Vegfa/Ntn1/Mafb/Gata2/Tbx3	11
GO:0032663	BP	GO:0032663	regulation of interleukin-2 production	5/256	69/23012	0.00103111	0.00873596	0.00610716	Cd83/Sptbn1/Hdac7/Tbx21/Il1b	5
GO:0070098	BP	GO:0070098	chemokine-mediated signaling pathway	5/256	69/23012	0.00103111	0.00873596	0.00610716	Edn1/Ackr3/Cxcl12/Cxcl15/Cxcl10	5
GO:0032370	BP	GO:0032370	positive regulation of lipid transport	6/256	103/23012	0.00103914	0.00878368	0.00614052	Edn1/Bmp6/Cav1/Retn/Apoe/Il1b	6
GO:0014910	BP	GO:0014910	regulation of smooth muscle cell migration	6/256	104/23012	0.00109266	0.00920477	0.00643489	Cav1/Gstp1/Retn/Aif1/Igfbp5/Egfl7	6
GO:0043409	BP	GO:0043409	negative regulation of MAPK cascade	8/256	184/23012	0.00109396	0.00920477	0.00643489	Timp3/Cav1/Nlrp12/Gstp1/Sema6a/Dab2ip/Apoe/Il1b	8
GO:0032102	BP	GO:0032102	negative regulation of response to external stimulus	14/256	483/23012	0.00109934	0.00921756	0.00644384	Phldb2/Sema3f/Nlrp12/Plat/Sema3g/Gstp1/Sema6a/Sema3c/Fgl2/Ctla2a/Cdh5/H2-Q10/Aif1/Apoe	14
GO:0045668	BP	GO:0045668	negative regulation of osteoblast differentiation	5/256	70/23012	0.00110049	0.00921756	0.00644384	Id1/Hdac7/Areg/Igfbp5/Smad6	5
GO:0032946	BP	GO:0032946	positive regulation of mononuclear cell proliferation	8/256	185/23012	0.00113264	0.00946529	0.00661702	Efnb1/Cd74/Csf1r/H2-Q10/Aif1/Kitl/Csf1/Il1b	8
GO:0001649	BP	GO:0001649	osteoblast differentiation	9/256	230/23012	0.00114243	0.00952539	0.00665904	Id1/Bmp6/Hdac7/Vegfa/Fermt2/Areg/Hey1/Igfbp5/Smad6	9
GO:0003184	BP	GO:0003184	pulmonary valve morphogenesis	3/256	19/23012	0.00115562	0.00954883	0.00667542	Nos3/Hey1/Smad6	3
GO:0030214	BP	GO:0030214	hyaluronan catabolic process	3/256	19/23012	0.00115562	0.00954883	0.00667542	Hexb/Cemip2/Lyve1	3
GO:1901550	BP	GO:1901550	regulation of endothelial cell development	3/256	19/23012	0.00115562	0.00954883	0.00667542	Vegfa/Cdh5/Il1b	3
GO:1903140	BP	GO:1903140	regulation of establishment of endothelial barrier	3/256	19/23012	0.00115562	0.00954883	0.00667542	Vegfa/Cdh5/Il1b	3
GO:0050771	BP	GO:0050771	negative regulation of axonogenesis	5/256	71/23012	0.00117327	0.00965126	0.00674702	Sema3f/Sema3g/Sema6a/Sema3c/Ntn1	5
GO:0050818	BP	GO:0050818	regulation of coagulation	5/256	71/23012	0.00117327	0.00965126	0.00674702	Cav1/Vwf/Plat/Thbd/Apoe	5
GO:0006636	BP	GO:0006636	unsaturated fatty acid biosynthetic process	4/256	42/23012	0.00120132	0.00979432	0.00684704	Edn1/Cd74/Scd1/Il1b	4
GO:0019755	BP	GO:0019755	one-carbon compound transport	4/256	42/23012	0.00120132	0.00979432	0.00684704	Hba-a1/Aqp1/Aqp9/Hbb-b1	4
GO:0038084	BP	GO:0038084	vascular endothelial growth factor signaling pathway	4/256	42/23012	0.00120132	0.00979432	0.00684704	Jcad/Vegfa/Sema6a/Dab2ip	4
GO:1901532	BP	GO:1901532	regulation of hematopoietic progenitor cell differentiation	4/256	42/23012	0.00120132	0.00979432	0.00684704	Fas/Vegfa/Kitl/Gata2	4
GO:0090288	BP	GO:0090288	negative regulation of cellular response to growth factor stimulus	6/256	106/23012	0.00120603	0.00981104	0.00685873	Cav1/Epn2/Sema6a/Mmrn2/Smad6/Dab2ip	6
GO:0071248	BP	GO:0071248	cellular response to metal ion	8/256	187/23012	0.00121329	0.00984825	0.00688474	Hfe/Fas/Bmp6/Aqp1/Lgmn/Snca/Slc40a1/Rasa4	8
GO:0060986	BP	GO:0060986	endocrine hormone secretion	5/256	72/23012	0.00124955	0.0101202	0.00707488	Bmp6/Aqp1/Retn/Tbx3/Il1b	5
GO:0001894	BP	GO:0001894	tissue homeostasis	10/256	281/23012	0.00126484	0.0101991	0.00713004	Tjp1/Aldh1a1/Nfib/Vegfa/Csf1r/Nos3/Gcnt2/S1pr1/Csf1/Gata2	10
GO:0060249	BP	GO:0060249	anatomical structure homeostasis	10/256	281/23012	0.00126484	0.0101991	0.00713004	Tjp1/Aldh1a1/Nfib/Vegfa/Csf1r/Nos3/Gcnt2/S1pr1/Csf1/Gata2	10
GO:0042471	BP	GO:0042471	ear morphogenesis	7/256	146/23012	0.00126966	0.0102156	0.00714158	Edn1/Ripor2/Clic5/Ntn1/Mafb/Gata2/Tbx3	7
GO:0045580	BP	GO:0045580	regulation of T cell differentiation	8/256	189/23012	0.00129844	0.0104244	0.00728753	Cd83/Fas/H2-Aa/Cd74/Fgl2/Ctla2a/Sox13/Tbx21	8
GO:2000403	BP	GO:2000403	positive regulation of lymphocyte migration	4/256	43/23012	0.00131307	0.0105189	0.00735358	Jam2/Cxcl12/Aif1/Cxcl10	4
GO:0016311	BP	GO:0016311	dephosphorylation	11/256	333/23012	0.00133597	0.0106791	0.00746555	Ppm1f/Ptprk/Ptprm/Plpp1/Tns2/Ptpn14/Cdh5/Ptprg/Dlc1/Ptprb/Ppp1r16b	11
GO:0035313	BP	GO:0035313	wound healing, spreading of epidermal cells	3/256	20/23012	0.00134844	0.0107321	0.0075026	Phldb2/Fermt2/Acvrl1	3
GO:0060973	BP	GO:0060973	cell migration involved in heart development	3/256	20/23012	0.00134844	0.0107321	0.0075026	Edn1/Sema3c/Eng	3
GO:0007156	BP	GO:0007156	homophilic cell adhesion via plasma membrane adhesion molecules	6/256	109/23012	0.00139272	0.0110605	0.00773222	Ptprm/Esam/Cdh13/Cdh5/Hmcn1/Pecam1	6
GO:0021700	BP	GO:0021700	developmental maturation	12/256	387/23012	0.00140237	0.0111132	0.00776901	Edn1/Vegfa/C1qa/Sox18/Cdh5/Pde3a/Arhgef15/Pou2f2/Epas1/S1pr1/Dab2ip/Gata2	12
GO:0016064	BP	GO:0016064	immunoglobulin mediated immune response	9/256	237/23012	0.0014063	0.0111204	0.00777405	Iglc2/Cd74/C1qb/C1qc/C1qa/Fgl2/H2-Q10/Pou2f2/Tbx21	9
GO:0010952	BP	GO:0010952	positive regulation of peptidase activity	8/256	192/23012	0.00143503	0.0113232	0.00791587	Ppm1f/Fas/Sox7/Acer2/Lgmn/Snca/Tnfsf10/Dlc1	8
GO:0007389	BP	GO:0007389	pattern specification process	14/256	498/23012	0.00146533	0.0115375	0.00806566	Edn1/Sema3f/Efnb1/C1qa/Sema3c/Mafb/Acvrl1/Hey1/Stil/Smad6/Meis2/Lama5/Eng/Tbx3	14
GO:0030217	BP	GO:0030217	T cell differentiation	11/256	337/23012	0.0014687	0.0115394	0.00806696	Cd83/Fas/H2-Aa/Kit/Cd74/Fgl2/Ctla2a/Mafb/Sox13/Tbx21/Il1b	11
GO:0120161	BP	GO:0120161	regulation of cold-induced thermogenesis	7/256	150/23012	0.00148373	0.0116326	0.00813215	Npr3/Id1/Cav1/Aldh1a1/Vegfa/Scd1/Epas1	7
GO:0055013	BP	GO:0055013	cardiac muscle cell development	6/256	111/23012	0.0015289	0.0119612	0.00836186	Myh11/Edn1/Vegfa/Myl2/Tbx3/Actc1	6
GO:0002761	BP	GO:0002761	regulation of myeloid leukocyte differentiation	7/256	151/23012	0.00154141	0.0119777	0.00837339	Cd74/C1qc/Csf1r/Mafb/Kitl/Csf1/Gata2	7
GO:0032944	BP	GO:0032944	regulation of mononuclear cell proliferation	10/256	289/23012	0.00155797	0.0119777	0.00837339	Ripor2/H2-Aa/Efnb1/Cd74/Csf1r/H2-Q10/Aif1/Kitl/Csf1/Il1b	10
GO:0031952	BP	GO:0031952	regulation of protein autophosphorylation	4/256	45/23012	0.00155802	0.0119777	0.00837339	Cav1/Nlrp12/Vegfa/Eng	4
GO:0050918	BP	GO:0050918	positive chemotaxis	4/256	45/23012	0.00155802	0.0119777	0.00837339	Cdh13/Vegfa/Cxcl12/S1pr1	4
GO:0002577	BP	GO:0002577	regulation of antigen processing and presentation	3/256	21/23012	0.00156032	0.0119777	0.00837339	Hfe/Cd74/Fgl2	3
GO:0019886	BP	GO:0019886	antigen processing and presentation of exogenous peptide antigen via MHC class II	3/256	21/23012	0.00156032	0.0119777	0.00837339	H2-Aa/H2-Eb1/Cd74	3
GO:0035234	BP	GO:0035234	ectopic germ cell programmed cell death	3/256	21/23012	0.00156032	0.0119777	0.00837339	Kit/Kitl/Il1b	3
GO:0045649	BP	GO:0045649	regulation of macrophage differentiation	3/256	21/23012	0.00156032	0.0119777	0.00837339	C1qc/Csf1/Gata2	3
GO:0048143	BP	GO:0048143	astrocyte activation	3/256	21/23012	0.00156032	0.0119777	0.00837339	C1qa/Csf1r/Il1b	3
GO:0001659	BP	GO:0001659	temperature homeostasis	8/256	195/23012	0.0015828	0.0121249	0.0084763	Npr3/Id1/Cav1/Aldh1a1/Vegfa/Scd1/Epas1/Il1b	8
GO:1904705	BP	GO:1904705	regulation of vascular associated smooth muscle cell proliferation	5/256	76/23012	0.00159172	0.0121679	0.00850638	Edn1/Timp3/Cav1/Gstp1/Igfbp5	5
GO:0002720	BP	GO:0002720	positive regulation of cytokine production involved in immune response	6/256	112/23012	0.00160068	0.0121857	0.00851879	Kit/Cd74/Tek/H2-Q10/Tbx21/Il1b	6
GO:0042116	BP	GO:0042116	macrophage activation	6/256	112/23012	0.00160068	0.0121857	0.00851879	Adgrf5/C1qa/Csf1r/Snca/Aif1/Il1rl1	6
GO:0097191	BP	GO:0097191	extrinsic apoptotic signaling pathway	9/256	242/23012	0.00162324	0.0123319	0.00862102	Fas/Timp3/Cav1/Gstp1/Vegfa/Tnfsf10/Kitl/Dab2ip/Il1b	9
GO:0032623	BP	GO:0032623	interleukin-2 production	5/256	77/23012	0.00168705	0.0127175	0.00889058	Cd83/Sptbn1/Hdac7/Tbx21/Il1b	5
GO:0048002	BP	GO:0048002	antigen processing and presentation of peptide antigen	5/256	77/23012	0.00168705	0.0127175	0.00889058	Hfe/H2-Aa/H2-Eb1/Cd74/H2-Q10	5
GO:1904036	BP	GO:1904036	negative regulation of epithelial cell apoptotic process	5/256	77/23012	0.00168705	0.0127175	0.00889058	Id1/Ramp2/Tek/Cdh5/Gata2	5
GO:0008154	BP	GO:0008154	actin polymerization or depolymerization	8/256	197/23012	0.00168783	0.0127175	0.00889058	Esam/Sptbn1/Cdc42ep1/Aif1/Diaph3/Eln/Cit/Pecam1	8
GO:0030324	BP	GO:0030324	lung development	9/256	244/23012	0.00171719	0.0129123	0.00902678	Id1/Nfib/Vegfa/Nos3/Hs6st1/Epas1/Igfbp5/Fendrr/Lama5	9
GO:0002718	BP	GO:0002718	regulation of cytokine production involved in immune response	7/256	154/23012	0.00172497	0.0129179	0.0090307	Hfe/Kit/Cd74/Tek/H2-Q10/Tbx21/Il1b	7
GO:0106106	BP	GO:0106106	cold-induced thermogenesis	7/256	154/23012	0.00172497	0.0129179	0.0090307	Npr3/Id1/Cav1/Aldh1a1/Vegfa/Scd1/Epas1	7
GO:0046578	BP	GO:0046578	regulation of Ras protein signal transduction	8/256	198/23012	0.00174237	0.0130217	0.00910326	Ripor2/Dlc1/Kitl/Csf1/Rasa4/Dab2ip/Rasip1/Apoe	8
GO:0045639	BP	GO:0045639	positive regulation of myeloid cell differentiation	6/256	114/23012	0.00175189	0.0130663	0.00913443	Cd74/Csf1r/Rcor1/Kitl/Csf1/Gata2	6
GO:0061180	BP	GO:0061180	mammary gland epithelium development	5/256	78/23012	0.00178651	0.0132841	0.00928672	Csmd1/Ntn1/Areg/Csf1/Tbx3	5
GO:0046660	BP	GO:0046660	female sex differentiation	7/256	155/23012	0.00178979	0.0132841	0.00928672	Csmd1/Kit/Vegfa/Nos3/Retn/Kitl/Tbx3	7
GO:0044794	BP	GO:0044794	positive regulation by host of viral process	3/256	22/23012	0.00179193	0.0132841	0.00928672	Cav2/Csf1r/Apoe	3
GO:0048873	BP	GO:0048873	homeostasis of number of cells within a tissue	4/256	47/23012	0.00183306	0.0135617	0.00948073	Vegfa/Nos3/Csf1/Gata2	4
GO:0030323	BP	GO:0030323	respiratory tube development	9/256	247/23012	0.00186626	0.0137796	0.00963305	Id1/Nfib/Vegfa/Nos3/Hs6st1/Epas1/Igfbp5/Fendrr/Lama5	9
GO:0032642	BP	GO:0032642	regulation of chemokine production	6/256	116/23012	0.0019137	0.0141016	0.00985815	Gstp1/Cd74/Csf1r/Aif1/Il1rl1/Il1b	6
GO:0055007	BP	GO:0055007	cardiac muscle cell differentiation	7/256	158/23012	0.00199564	0.0146654	0.0102523	Myh11/Edn1/Vegfa/Efnb2/Myl2/Tbx3/Actc1	7
GO:1903510	BP	GO:1903510	mucopolysaccharide metabolic process	5/256	80/23012	0.0019982	0.0146654	0.0102523	Hexb/Cemip2/Lyve1/Chst11/Il1b	5
GO:0003177	BP	GO:0003177	pulmonary valve development	3/256	23/23012	0.0020439	0.014882	0.0104038	Nos3/Hey1/Smad6	3
GO:0045217	BP	GO:0045217	cell-cell junction maintenance	3/256	23/23012	0.0020439	0.014882	0.0104038	Tjp1/Csf1r/Fermt2	3
GO:0051043	BP	GO:0051043	regulation of membrane protein ectodomain proteolysis	3/256	23/23012	0.0020439	0.014882	0.0104038	Timp3/Apoe/Il1b	3
GO:1903672	BP	GO:1903672	positive regulation of sprouting angiogenesis	3/256	23/23012	0.0020439	0.014882	0.0104038	Tjp1/Jcad/Vegfa	3
GO:0044272	BP	GO:0044272	sulfur compound biosynthetic process	6/256	118/23012	0.00208658	0.0151628	0.0106	Gstp1/Ndst1/Snca/Fmo1/Hs6st1/Chst11	6
GO:1990874	BP	GO:1990874	vascular associated smooth muscle cell proliferation	5/256	81/23012	0.00211066	0.0153075	0.0107012	Edn1/Timp3/Cav1/Gstp1/Igfbp5	5
GO:0001774	BP	GO:0001774	microglial cell activation	4/256	49/23012	0.00214003	0.0154595	0.0108075	C1qa/Csf1r/Snca/Aif1	4
GO:0002931	BP	GO:0002931	response to ischemia	4/256	49/23012	0.00214003	0.0154595	0.0108075	Npr3/Cav1/Csf1r/Csf1	4
GO:0043547	BP	GO:0043547	positive regulation of GTPase activity	9/256	253/23012	0.0021954	0.0158284	0.0110653	Dock9/Cav2/Rasgrp3/Arap3/Fermt2/Adap2/Arhgef15/S1pr1/Arhgap29	9
GO:0003208	BP	GO:0003208	cardiac ventricle morphogenesis	5/256	82/23012	0.00222766	0.0159884	0.0111772	Ccm2l/Sema3c/Hey1/Myl2/Eng	5
GO:0051149	BP	GO:0051149	positive regulation of muscle cell differentiation	5/256	82/23012	0.00222766	0.0159884	0.0111772	Edn1/Kit/Nid1/Efnb2/Eng	5
GO:0002695	BP	GO:0002695	negative regulation of leukocyte activation	8/256	206/23012	0.00223063	0.0159884	0.0111772	Hfe/Fas/Ripor2/H2-Aa/Adgrf5/Cd74/Fgl2/Tbx21	8
GO:0150105	BP	GO:0150105	protein localization to cell-cell junction	3/256	24/23012	0.00231683	0.0165739	0.0115865	Tjp1/Cdh5/Pecam1	3
GO:0008585	BP	GO:0008585	female gonad development	6/256	122/23012	0.00246745	0.0175829	0.0122919	Csmd1/Kit/Vegfa/Nos3/Retn/Kitl	6
GO:0042472	BP	GO:0042472	inner ear morphogenesis	6/256	122/23012	0.00246745	0.0175829	0.0122919	Ripor2/Clic5/Ntn1/Mafb/Gata2/Tbx3	6
GO:0032272	BP	GO:0032272	negative regulation of protein polymerization	5/256	84/23012	0.00247573	0.0176078	0.0123093	Sptbn1/Stmn2/Snca/Cdh5/Pecam1	5
GO:2000404	BP	GO:2000404	regulation of T cell migration	4/256	51/23012	0.00248075	0.0176095	0.0123105	Ripor2/Cxcl12/Aif1/Cxcl10	4
GO:0002449	BP	GO:0002449	lymphocyte mediated immunity	12/256	416/23012	0.00255057	0.0180702	0.0126326	Hfe/Fas/Iglc2/Cd74/C1qb/C1qc/C1qa/Fgl2/H2-Q10/Pou2f2/Tbx21/Il1b	12
GO:0032963	BP	GO:0032963	collagen metabolic process	6/256	123/23012	0.00257033	0.0181752	0.012706	Id1/Ltbp1/Tns2/Serpinh1/Retn/Eng	6
GO:0098742	BP	GO:0098742	cell-cell adhesion via plasma-membrane adhesion molecules	8/256	211/23012	0.00258652	0.0182546	0.0127615	Ptprm/Esam/Cdh13/Pcdh17/Cdh5/Hmcn1/Selp/Pecam1	8
GO:0043112	BP	GO:0043112	receptor metabolic process	5/256	85/23012	0.00260701	0.018289	0.0127855	Lgmn/Snca/Ece1/Nsg1/Apoe	5
GO:0002495	BP	GO:0002495	antigen processing and presentation of peptide antigen via MHC class II	3/256	25/23012	0.00261129	0.018289	0.0127855	H2-Aa/H2-Eb1/Cd74	3
GO:0035024	BP	GO:0035024	negative regulation of Rho protein signal transduction	3/256	25/23012	0.00261129	0.018289	0.0127855	Ripor2/Dlc1/Rasip1	3
GO:1901739	BP	GO:1901739	regulation of myoblast fusion	3/256	25/23012	0.00261129	0.018289	0.0127855	Ripor2/Cxcl12/Cxcl10	3
GO:0019722	BP	GO:0019722	calcium-mediated signaling	8/256	212/23012	0.00266275	0.0185896	0.0129956	Edn1/Cdh13/Ackr3/Tspan18/Mapt/Tmem100/Selp/Cxcr2	8
GO:0002478	BP	GO:0002478	antigen processing and presentation of exogenous peptide antigen	4/256	52/23012	0.00266432	0.0185896	0.0129956	H2-Aa/H2-Eb1/Cd74/H2-Q10	4
GO:0030010	BP	GO:0030010	establishment of cell polarity	7/256	167/23012	0.00272453	0.0189736	0.0132641	Phldb2/Ripor2/Amotl1/Amotl2/Cdh5/Pard3/Hey1	7
GO:0032722	BP	GO:0032722	positive regulation of chemokine production	5/256	86/23012	0.00274327	0.0190321	0.013305	Cd74/Csf1r/Aif1/Il1rl1/Il1b	5
GO:0043954	BP	GO:0043954	cellular component maintenance	5/256	86/23012	0.00274327	0.0190321	0.013305	Tjp1/Homer1/Csf1r/Fermt2/Apoe	5
GO:0090092	BP	GO:0090092	regulation of transmembrane receptor protein serine/threonine kinase signaling pathway	9/256	262/23012	0.00277417	0.0192102	0.0134295	Bmp6/Cav2/Cav1/Ltbp1/Cdh5/Acvrl1/Chst11/Smad6/Eng	9
GO:0046545	BP	GO:0046545	development of primary female sexual characteristics	6/256	125/23012	0.00278572	0.0192539	0.0134601	Csmd1/Kit/Vegfa/Nos3/Retn/Kitl	6
GO:0002440	BP	GO:0002440	production of molecular mediator of immune response	12/256	421/23012	0.00281003	0.0193855	0.0135521	Hfe/Fas/Dnajb9/Kit/Cd74/Tek/Fgl2/H2-Q10/Pou2f2/Slamf9/Tbx21/Il1b	12
GO:0002269	BP	GO:0002269	leukocyte activation involved in inflammatory response	4/256	53/23012	0.00285699	0.0195991	0.0137014	C1qa/Csf1r/Snca/Aif1	4
GO:0042088	BP	GO:0042088	T-helper 1 type immune response	4/256	53/23012	0.00285699	0.0195991	0.0137014	Vegfa/Il1rl1/Tbx21/Il1b	4
GO:0071709	BP	GO:0071709	membrane assembly	4/256	53/23012	0.00285699	0.0195991	0.0137014	Cav2/Cav1/Sptbn1/Mafb	4
GO:1905954	BP	GO:1905954	positive regulation of lipid localization	6/256	126/23012	0.00289835	0.0198459	0.0138739	Edn1/Bmp6/Cav1/Retn/Apoe/Il1b	6
GO:0071695	BP	GO:0071695	anatomical structure maturation	10/256	315/23012	0.00291163	0.0198998	0.0139116	Edn1/Vegfa/C1qa/Sox18/Cdh5/Pde3a/Pou2f2/Epas1/S1pr1/Gata2	10
GO:1902230	BP	GO:1902230	negative regulation of intrinsic apoptotic signaling pathway in response to DNA damage	3/256	26/23012	0.00292783	0.0199364	0.0139372	Cd74/Ackr3/Cxcl12	3
GO:1903975	BP	GO:1903975	regulation of glial cell migration	3/256	26/23012	0.00292783	0.0199364	0.0139372	Fas/Ntn1/Csf1	3
GO:0062197	BP	GO:0062197	cellular response to chemical stress	10/256	316/23012	0.00297813	0.0202414	0.0141504	Edn1/Fas/Ptprk/Serpinb6b/Cav1/Aqp1/Snca/Nos3/Aif1/Epas1	10
GO:0002702	BP	GO:0002702	positive regulation of production of molecular mediator of immune response	7/256	170/23012	0.00300805	0.0203372	0.0142174	Dnajb9/Kit/Cd74/Tek/H2-Q10/Tbx21/Il1b	7
GO:0030041	BP	GO:0030041	actin filament polymerization	7/256	170/23012	0.00300805	0.0203372	0.0142174	Esam/Sptbn1/Cdc42ep1/Aif1/Diaph3/Eln/Pecam1	7
GO:0019882	BP	GO:0019882	antigen processing and presentation	6/256	127/23012	0.00301435	0.0203372	0.0142174	Hfe/H2-Aa/H2-Eb1/Cd74/Fgl2/H2-Q10	6
GO:0061041	BP	GO:0061041	regulation of wound healing	6/256	127/23012	0.00301435	0.0203372	0.0142174	Phldb2/Cav1/Vwf/Plat/Fermt2/Apoe	6
GO:0046785	BP	GO:0046785	microtubule polymerization	5/256	88/23012	0.00303114	0.020413	0.0142704	Cav1/Stmn2/Snca/Cdh5/Mapt	5
GO:0010718	BP	GO:0010718	positive regulation of epithelial to mesenchymal transition	4/256	54/23012	0.00305897	0.0205253	0.0143489	Fermt2/Gcnt2/Eng/Il1b	4
GO:0099054	BP	GO:0099054	presynapse assembly	4/256	54/23012	0.00305897	0.0205253	0.0143489	Efnb1/Pcdh17/Efnb2/Snca	4
GO:0003281	BP	GO:0003281	ventricular septum development	5/256	89/23012	0.00318297	0.0213184	0.0149033	Ltbp1/Nos3/Hey1/Smad6/Tbx3	5
GO:0002070	BP	GO:0002070	epithelial cell maturation	3/256	27/23012	0.00326698	0.0216678	0.0151476	Vegfa/Epas1/Gata2	3
GO:0002504	BP	GO:0002504	antigen processing and presentation of peptide or polysaccharide antigen via MHC class II	3/256	27/23012	0.00326698	0.0216678	0.0151476	H2-Aa/H2-Eb1/Cd74	3
GO:0003148	BP	GO:0003148	outflow tract septum morphogenesis	3/256	27/23012	0.00326698	0.0216678	0.0151476	Sema3c/Smad6/Eng	3
GO:0032878	BP	GO:0032878	regulation of establishment or maintenance of cell polarity	3/256	27/23012	0.00326698	0.0216678	0.0151476	Ripor2/Tek/Cdh5	3
GO:0097396	BP	GO:0097396	response to interleukin-17	3/256	27/23012	0.00326698	0.0216678	0.0151476	Shank3/Cxcl10/Il1b	3
GO:0006693	BP	GO:0006693	prostaglandin metabolic process	4/256	55/23012	0.0032705	0.0216678	0.0151476	Edn1/Gstp1/Cd74/Il1b	4
GO:0150063	BP	GO:0150063	visual system development	12/256	431/23012	0.0033934	0.0224416	0.0156885	Ptprm/Bmp6/Rhoj/Aldh1a1/Nfib/Aqp1/Vegfa/C1qa/Col4a1/Arhgef15/Acvrl1/Meis2	12
GO:0051250	BP	GO:0051250	negative regulation of lymphocyte activation	7/256	174/23012	0.00342058	0.0225808	0.0157858	Hfe/Fas/Ripor2/H2-Aa/Cd74/Fgl2/Tbx21	7
GO:0048639	BP	GO:0048639	positive regulation of developmental growth	8/256	221/23012	0.00343064	0.0226065	0.0158038	Edn1/Vegfa/Ntn1/Cxcl12/Mapt/Ghr/Csf1/Apoe	8
GO:0006692	BP	GO:0006692	prostanoid metabolic process	4/256	56/23012	0.00349176	0.0228863	0.0159994	Edn1/Gstp1/Cd74/Il1b	4
GO:0031529	BP	GO:0031529	ruffle organization	4/256	56/23012	0.00349176	0.0228863	0.0159994	Ston1/Cav1/Csf1r/Aif1	4
GO:0055010	BP	GO:0055010	ventricular cardiac muscle tissue morphogenesis	4/256	56/23012	0.00349176	0.0228863	0.0159994	Ccm2l/Hey1/Myl2/Eng	4
GO:0045619	BP	GO:0045619	regulation of lymphocyte differentiation	8/256	223/23012	0.0036225	0.023701	0.0165689	Cd83/Fas/H2-Aa/Cd74/Fgl2/Ctla2a/Sox13/Tbx21	8
GO:0007596	BP	GO:0007596	blood coagulation	7/256	176/23012	0.00364236	0.0237885	0.0166302	Cav1/Vwf/Plat/Tspan9/Selp/Thbd/Apoe	7
GO:0048880	BP	GO:0048880	sensory system development	12/256	435/23012	0.00365258	0.023813	0.0166472	Ptprm/Bmp6/Rhoj/Aldh1a1/Nfib/Aqp1/Vegfa/C1qa/Col4a1/Arhgef15/Acvrl1/Meis2	12
GO:0008593	BP	GO:0008593	regulation of Notch signaling pathway	5/256	92/23012	0.00367131	0.0238505	0.0166735	Kit/Epn2/Hey1/Gata2/Egfl7	5
GO:0031110	BP	GO:0031110	regulation of microtubule polymerization or depolymerization	5/256	92/23012	0.00367131	0.0238505	0.0166735	Cav1/Stmn2/Snca/Cdh5/Mapt	5
GO:0042743	BP	GO:0042743	hydrogen peroxide metabolic process	4/256	57/23012	0.00372299	0.0241436	0.0168784	Hba-a1/Snca/Hbb-bt/Hbb-b1	4
GO:2001233	BP	GO:2001233	regulation of apoptotic signaling pathway	12/256	437/23012	0.00378803	0.0245221	0.017143	Fas/Timp3/Gsdme/Cav1/Gstp1/Cd74/Vegfa/Tnfsf10/Ackr3/Cxcl12/Dab2ip/Il1b	12
GO:0002274	BP	GO:0002274	myeloid leukocyte activation	9/256	276/23012	0.00390785	0.0252534	0.0176542	Kit/Adgrf5/C1qa/Csf1r/Snca/Aif1/Il1rl1/Cxcr2/Gata2	9
GO:0050817	BP	GO:0050817	coagulation	7/256	179/23012	0.00399533	0.0257643	0.0180114	Cav1/Vwf/Plat/Tspan9/Selp/Thbd/Apoe	7
GO:0060541	BP	GO:0060541	respiratory system development	9/256	277/23012	0.00400093	0.0257643	0.0180114	Id1/Nfib/Vegfa/Nos3/Hs6st1/Epas1/Igfbp5/Fendrr/Lama5	9
GO:0014821	BP	GO:0014821	phasic smooth muscle contraction	3/256	29/23012	0.00401505	0.025765	0.0180118	Edn1/Kit/Tbx3	3
GO:0032770	BP	GO:0032770	positive regulation of monooxygenase activity	3/256	29/23012	0.00401505	0.025765	0.0180118	Npr3/Apoe/Il1b	3
GO:0019884	BP	GO:0019884	antigen processing and presentation of exogenous antigen	4/256	59/23012	0.00421615	0.0269146	0.0188155	H2-Aa/H2-Eb1/Cd74/H2-Q10	4
GO:0140353	BP	GO:0140353	lipid export from cell	4/256	59/23012	0.00421615	0.0269146	0.0188155	Edn1/Bmp6/Retn/Il1b	4
GO:1900271	BP	GO:1900271	regulation of long-term synaptic potentiation	4/256	59/23012	0.00421615	0.0269146	0.0188155	Shank3/Lgmn/Nsg1/Apoe	4
GO:0032943	BP	GO:0032943	mononuclear cell proliferation	11/256	387/23012	0.00424526	0.0270259	0.0188934	Ripor2/H2-Aa/Efnb1/Cd74/Csf1r/H2-Q10/Cxcl12/Aif1/Kitl/Csf1/Il1b	11
GO:0051056	BP	GO:0051056	regulation of small GTPase mediated signal transduction	8/256	229/23012	0.0042483	0.0270259	0.0188934	Ripor2/Dlc1/Kitl/Csf1/Rasa4/Dab2ip/Rasip1/Apoe	8
GO:0035148	BP	GO:0035148	tube formation	7/256	182/23012	0.00437365	0.0277274	0.0193838	Shank3/Nfib/Vegfa/Mmrn2/Dlc1/Stil/Dab2ip	7
GO:0050671	BP	GO:0050671	positive regulation of lymphocyte proliferation	7/256	182/23012	0.00437365	0.0277274	0.0193838	Efnb1/Cd74/Csf1r/H2-Q10/Aif1/Kitl/Il1b	7
GO:0001919	BP	GO:0001919	regulation of receptor recycling	3/256	30/23012	0.00442488	0.027765	0.01941	Snca/Ece1/Nsg1	3
GO:0007350	BP	GO:0007350	blastoderm segmentation	3/256	30/23012	0.00442488	0.027765	0.01941	Sema3f/Lama5/Tbx3	3
GO:0015732	BP	GO:0015732	prostaglandin transport	3/256	30/23012	0.00442488	0.027765	0.01941	Edn1/Slco2a1/Il1b	3
GO:0030224	BP	GO:0030224	monocyte differentiation	3/256	30/23012	0.00442488	0.027765	0.01941	Cd74/Vegfa/Csf1	3
GO:0060343	BP	GO:0060343	trabecula formation	3/256	30/23012	0.00442488	0.027765	0.01941	Vegfa/Tek/Slc40a1	3
GO:1990000	BP	GO:1990000	amyloid fibril formation	3/256	30/23012	0.00442488	0.027765	0.01941	Snca/Mapt/Apoe	3
GO:0003012	BP	GO:0003012	muscle system process	12/256	446/23012	0.00444854	0.0278659	0.0194806	Myh11/Edn1/Cav1/Kit/Homer1/Nos3/Aif1/Igfbp5/Ece1/Myl2/Tbx3/Actc1	12
GO:0044091	BP	GO:0044091	membrane biogenesis	4/256	60/23012	0.00447849	0.0280058	0.0195784	Cav2/Cav1/Sptbn1/Mafb	4
GO:0021782	BP	GO:0021782	glial cell development	6/256	138/23012	0.0045309	0.0282375	0.0197403	Sh3tc2/C1qa/Csf1r/Pard3/Prx/Il1b	6
GO:0050868	BP	GO:0050868	negative regulation of T cell activation	6/256	138/23012	0.0045309	0.0282375	0.0197403	Hfe/Ripor2/H2-Aa/Cd74/Fgl2/Tbx21	6
GO:0048469	BP	GO:0048469	cell maturation	8/256	233/23012	0.00470965	0.0293018	0.0204844	Edn1/Vegfa/C1qa/Sox18/Pde3a/Pou2f2/Epas1/Gata2	8
GO:0050670	BP	GO:0050670	regulation of lymphocyte proliferation	9/256	285/23012	0.00480957	0.029873	0.0208837	Ripor2/H2-Aa/Efnb1/Cd74/Csf1r/H2-Q10/Aif1/Kitl/Il1b	9
GO:0001516	BP	GO:0001516	prostaglandin biosynthetic process	3/256	31/23012	0.00485916	0.0298781	0.0208873	Edn1/Cd74/Il1b	3
GO:0002026	BP	GO:0002026	regulation of the force of heart contraction	3/256	31/23012	0.00485916	0.0298781	0.0208873	Cav1/Nos3/Myl2	3
GO:0006027	BP	GO:0006027	glycosaminoglycan catabolic process	3/256	31/23012	0.00485916	0.0298781	0.0208873	Hexb/Cemip2/Lyve1	3
GO:0042044	BP	GO:0042044	fluid transport	3/256	31/23012	0.00485916	0.0298781	0.0208873	Edn1/Aqp1/Aqp9	3
GO:0043129	BP	GO:0043129	surfactant homeostasis	3/256	31/23012	0.00485916	0.0298781	0.0208873	Adgrf5/Vegfa/Epas1	3
GO:0046457	BP	GO:0046457	prostanoid biosynthetic process	3/256	31/23012	0.00485916	0.0298781	0.0208873	Edn1/Cd74/Il1b	3
GO:0002244	BP	GO:0002244	hematopoietic progenitor cell differentiation	7/256	186/23012	0.00491948	0.0301986	0.0211113	Fas/Top2a/Kit/Vegfa/Eml1/Kitl/Gata2	7
GO:0021675	BP	GO:0021675	nerve development	5/256	99/23012	0.0050161	0.0306892	0.0214543	Edn1/Sema3f/Ackr3/Mafb/Ece1	5
GO:0045638	BP	GO:0045638	negative regulation of myeloid cell differentiation	5/256	99/23012	0.0050161	0.0306892	0.0214543	C1qc/Csf1r/Mafb/Meis2/Gata2	5
GO:0002011	BP	GO:0002011	morphogenesis of an epithelial sheet	4/256	62/23012	0.0050357	0.0307069	0.0214667	Phldb2/Fermt2/Pard3/Acvrl1	4
GO:0099172	BP	GO:0099172	presynapse organization	4/256	62/23012	0.0050357	0.0307069	0.0214667	Efnb1/Pcdh17/Efnb2/Snca	4
GO:0002700	BP	GO:0002700	regulation of production of molecular mediator of immune response	8/256	236/23012	0.00508019	0.0309269	0.0216205	Hfe/Dnajb9/Kit/Cd74/Tek/H2-Q10/Tbx21/Il1b	8
GO:0003002	BP	GO:0003002	regionalization	12/256	455/23012	0.00519842	0.031119	0.0217548	Edn1/Sema3f/C1qa/Sema3c/Mafb/Acvrl1/Hey1/Stil/Smad6/Lama5/Eng/Tbx3	12
GO:0072089	BP	GO:0072089	stem cell proliferation	6/256	142/23012	0.00520178	0.031119	0.0217548	Nfib/Fermt2/Sox18/Kitl/Mki67/Tbx3	6
GO:0001765	BP	GO:0001765	membrane raft assembly	2/256	10/23012	0.00523023	0.031119	0.0217548	Cav2/Cav1	2
GO:0002604	BP	GO:0002604	regulation of dendritic cell antigen processing and presentation	2/256	10/23012	0.00523023	0.031119	0.0217548	Cd74/Fgl2	2
GO:0003253	BP	GO:0003253	cardiac neural crest cell migration involved in outflow tract morphogenesis	2/256	10/23012	0.00523023	0.031119	0.0217548	Edn1/Sema3c	2
GO:0044857	BP	GO:0044857	plasma membrane raft organization	2/256	10/23012	0.00523023	0.031119	0.0217548	Cav2/Cav1	2
GO:0048703	BP	GO:0048703	embryonic viscerocranium morphogenesis	2/256	10/23012	0.00523023	0.031119	0.0217548	Ndst1/Chst11	2
GO:0051001	BP	GO:0051001	negative regulation of nitric-oxide synthase activity	2/256	10/23012	0.00523023	0.031119	0.0217548	Cav1/Eng	2
GO:0051583	BP	GO:0051583	dopamine uptake involved in synaptic transmission	2/256	10/23012	0.00523023	0.031119	0.0217548	Slc6a2/Snca	2
GO:0051934	BP	GO:0051934	catecholamine uptake involved in synaptic transmission	2/256	10/23012	0.00523023	0.031119	0.0217548	Slc6a2/Snca	2
GO:0071670	BP	GO:0071670	smooth muscle cell chemotaxis	2/256	10/23012	0.00523023	0.031119	0.0217548	Gstp1/Aif1	2
GO:0071830	BP	GO:0071830	triglyceride-rich lipoprotein particle clearance	2/256	10/23012	0.00523023	0.031119	0.0217548	Gpihbp1/Apoe	2
GO:0075509	BP	GO:0075509	endocytosis involved in viral entry into host cell	2/256	10/23012	0.00523023	0.031119	0.0217548	Cav2/Cav1	2
GO:1903596	BP	GO:1903596	regulation of gap junction assembly	2/256	10/23012	0.00523023	0.031119	0.0217548	Cav1/Il1b	2
GO:1902074	BP	GO:1902074	response to salt	10/256	343/23012	0.00528272	0.0313123	0.0218899	Fas/Cav1/Homer1/Lgmn/Snca/Ly6a/Ly6c1/Rasa4/S100a16/Il1b	10
GO:0007263	BP	GO:0007263	nitric oxide mediated signal transduction	3/256	32/23012	0.00531827	0.0313123	0.0218899	Vegfa/Nos3/Apoe	3
GO:0010623	BP	GO:0010623	programmed cell death involved in cell development	3/256	32/23012	0.00531827	0.0313123	0.0218899	Kit/Kitl/Il1b	3
GO:0022011	BP	GO:0022011	myelination in peripheral nervous system	3/256	32/23012	0.00531827	0.0313123	0.0218899	Sh3tc2/Pard3/Prx	3
GO:0032292	BP	GO:0032292	peripheral nervous system axon ensheathment	3/256	32/23012	0.00531827	0.0313123	0.0218899	Sh3tc2/Pard3/Prx	3
GO:0060037	BP	GO:0060037	pharyngeal system development	3/256	32/23012	0.00531827	0.0313123	0.0218899	Edn1/Adgrf5/Ece1	3
GO:0006956	BP	GO:0006956	complement activation	4/256	63/23012	0.00533096	0.0313123	0.0218899	C1qb/C1qc/C1qa/Il1b	4
GO:0042491	BP	GO:0042491	inner ear auditory receptor cell differentiation	4/256	63/23012	0.00533096	0.0313123	0.0218899	Ripor2/Gsdme/Clic5/Hey1	4
GO:0046777	BP	GO:0046777	protein autophosphorylation	8/256	238/23012	0.00533935	0.0313123	0.0218899	Cav1/Nlrp12/Kit/Vegfa/Tek/Csf1r/Ephb4/Eng	8
GO:0050772	BP	GO:0050772	positive regulation of axonogenesis	5/256	101/23012	0.00545693	0.0319509	0.0223363	Vegfa/Ntn1/Cxcl12/Mapt/Apoe	5
GO:0009612	BP	GO:0009612	response to mechanical stimulus	7/256	190/23012	0.00551509	0.0322401	0.0225385	Ripor2/Shank3/Cav1/Kit/Aqp1/Nos3/Cxcl12	7
GO:0014902	BP	GO:0014902	myotube differentiation	6/256	145/23012	0.00575074	0.0335642	0.0234642	Ripor2/Cav2/Homer1/Csf1r/Cxcl12/Cxcl10	6
GO:0002825	BP	GO:0002825	regulation of T-helper 1 type immune response	3/256	33/23012	0.00580261	0.0337598	0.0236009	Il1rl1/Tbx21/Il1b	3
GO:0008045	BP	GO:0008045	motor neuron axon guidance	3/256	33/23012	0.00580261	0.0337598	0.0236009	Sema3f/Ntn1/Cxcl12	3
GO:0031346	BP	GO:0031346	positive regulation of cell projection organization	12/256	462/23012	0.00584869	0.0339741	0.0237507	Ripor2/Negr1/Kit/Stmn2/Aqp1/Vegfa/Ntn1/Cdc42ep1/Cxcl12/Mapt/Dab2ip/Apoe	12
GO:1901222	BP	GO:1901222	regulation of non-canonical NF-kappaB signal transduction	5/256	103/23012	0.00592446	0.03436	0.0240205	Edn1/Nlrp12/Hdac7/Tek/Il1b	5
GO:0002548	BP	GO:0002548	monocyte chemotaxis	4/256	65/23012	0.00595573	0.0344327	0.0240713	Lgmn/Cxcl12/Aif1/Cxcl10	4
GO:0048008	BP	GO:0048008	platelet-derived growth factor receptor signaling pathway	4/256	65/23012	0.00595573	0.0344327	0.0240713	Ston1/Plat/Vegfa/Snca	4
GO:0030193	BP	GO:0030193	regulation of blood coagulation	4/256	66/23012	0.00628563	0.0355152	0.0248281	Cav1/Vwf/Plat/Apoe	4
GO:0042311	BP	GO:0042311	vasodilation	4/256	66/23012	0.00628563	0.0355152	0.0248281	Npr3/Ptprm/Vegfa/Apoe	4
GO:0071260	BP	GO:0071260	cellular response to mechanical stimulus	4/256	66/23012	0.00628563	0.0355152	0.0248281	Ripor2/Cav1/Aqp1/Nos3	4
GO:0010758	BP	GO:0010758	regulation of macrophage chemotaxis	3/256	34/23012	0.00631251	0.0355152	0.0248281	Csf1r/Mtus1/Csf1	3
GO:1904706	BP	GO:1904706	negative regulation of vascular associated smooth muscle cell proliferation	3/256	34/23012	0.00631251	0.0355152	0.0248281	Timp3/Cav1/Gstp1	3
GO:0002725	BP	GO:0002725	negative regulation of T cell cytokine production	2/256	11/23012	0.0063458	0.0355152	0.0248281	Hfe/Tbx21	2
GO:0008354	BP	GO:0008354	germ cell migration	2/256	11/23012	0.0063458	0.0355152	0.0248281	Kit/Cxcl12	2
GO:0034370	BP	GO:0034370	triglyceride-rich lipoprotein particle remodeling	2/256	11/23012	0.0063458	0.0355152	0.0248281	Gpihbp1/Apoe	2
GO:0035701	BP	GO:0035701	hematopoietic stem cell migration	2/256	11/23012	0.0063458	0.0355152	0.0248281	Kit/Jam2	2
GO:0035744	BP	GO:0035744	T-helper 1 cell cytokine production	2/256	11/23012	0.0063458	0.0355152	0.0248281	Tbx21/Il1b	2
GO:0042045	BP	GO:0042045	epithelial fluid transport	2/256	11/23012	0.0063458	0.0355152	0.0248281	Edn1/Aqp1	2
GO:0042118	BP	GO:0042118	endothelial cell activation	2/256	11/23012	0.0063458	0.0355152	0.0248281	Acvrl1/Cxcl10	2
GO:0060056	BP	GO:0060056	mammary gland involution	2/256	11/23012	0.0063458	0.0355152	0.0248281	Cav1/Igfbp5	2
GO:0060385	BP	GO:0060385	axonogenesis involved in innervation	2/256	11/23012	0.0063458	0.0355152	0.0248281	Edn1/Ece1	2
GO:0060600	BP	GO:0060600	dichotomous subdivision of an epithelial terminal unit	2/256	11/23012	0.0063458	0.0355152	0.0248281	Sema3c/Areg	2
GO:0060837	BP	GO:0060837	blood vessel endothelial cell differentiation	2/256	11/23012	0.0063458	0.0355152	0.0248281	Hey1/Tmem100	2
GO:0090269	BP	GO:0090269	fibroblast growth factor production	2/256	11/23012	0.0063458	0.0355152	0.0248281	Ccm2l/Aif1	2
GO:0090270	BP	GO:0090270	regulation of fibroblast growth factor production	2/256	11/23012	0.0063458	0.0355152	0.0248281	Ccm2l/Aif1	2
GO:0110011	BP	GO:0110011	regulation of basement membrane organization	2/256	11/23012	0.0063458	0.0355152	0.0248281	Phldb2/Nid1	2
GO:2001214	BP	GO:2001214	positive regulation of vasculogenesis	2/256	11/23012	0.0063458	0.0355152	0.0248281	Ramp2/Tmem100	2
GO:2001280	BP	GO:2001280	positive regulation of unsaturated fatty acid biosynthetic process	2/256	11/23012	0.0063458	0.0355152	0.0248281	Cd74/Il1b	2
GO:0009100	BP	GO:0009100	glycoprotein metabolic process	10/256	354/23012	0.00654879	0.0365956	0.0255833	Hexb/Man1a/Acer2/Ndst1/Galnt18/Hs6st1/Gcnt2/Chst11/Tmtc1/B3gnt2	10
GO:0072091	BP	GO:0072091	regulation of stem cell proliferation	5/256	106/23012	0.00667759	0.0372587	0.0260469	Nfib/Fermt2/Sox18/Kitl/Tbx3	5
GO:0031112	BP	GO:0031112	positive regulation of microtubule polymerization or depolymerization	3/256	35/23012	0.00684832	0.0380957	0.026632	Cav1/Stmn2/Mapt	3
GO:0060142	BP	GO:0060142	regulation of syncytium formation by plasma membrane fusion	3/256	35/23012	0.00684832	0.0380957	0.026632	Ripor2/Cxcl12/Cxcl10	3
GO:0001657	BP	GO:0001657	ureteric bud development	5/256	107/23012	0.00694287	0.0383894	0.0268373	Gsta3/Vegfa/Hey1/Smad6/Lama5	5
GO:0030510	BP	GO:0030510	regulation of BMP signaling pathway	5/256	107/23012	0.00694287	0.0383894	0.0268373	Cav1/Cdh5/Acvrl1/Smad6/Eng	5
GO:0043502	BP	GO:0043502	regulation of muscle adaptation	5/256	107/23012	0.00694287	0.0383894	0.0268373	Edn1/Nos3/Aif1/Igfbp5/Ece1	5
GO:0070167	BP	GO:0070167	regulation of biomineral tissue development	5/256	107/23012	0.00694287	0.0383894	0.0268373	Bmp6/Csf1r/Nos3/S1pr1/Hey1	5
GO:0006638	BP	GO:0006638	neutral lipid metabolic process	6/256	151/23012	0.00697382	0.0384287	0.0268648	Cav1/Plpp1/Scd1/Snca/Gpihbp1/Apoe	6
GO:0032233	BP	GO:0032233	positive regulation of actin filament bundle assembly	4/256	68/23012	0.00698133	0.0384287	0.0268648	Ppm1f/Id1/Fermt2/Arhgef15	4
GO:1900046	BP	GO:1900046	regulation of hemostasis	4/256	68/23012	0.00698133	0.0384287	0.0268648	Cav1/Vwf/Plat/Apoe	4
GO:1901184	BP	GO:1901184	regulation of ERBB signaling pathway	4/256	69/23012	0.0073475	0.0402838	0.0281617	Sh3tc2/Cdh13/Lgmn/Dab2ip	4
GO:0045165	BP	GO:0045165	cell fate commitment	9/256	305/23012	0.00738948	0.0402838	0.0281617	Edn1/Nfib/Sox18/Epas1/Sox13/Tbx21/Gata2/Myl2/Tbx3	9
GO:0043537	BP	GO:0043537	negative regulation of blood vessel endothelial cell migration	3/256	36/23012	0.00741034	0.0402838	0.0281617	Mmrn2/Acvrl1/Apoe	3
GO:0002399	BP	GO:0002399	MHC class II protein complex assembly	2/256	12/23012	0.00755938	0.0402838	0.0281617	H2-Aa/H2-Eb1	2
GO:0002503	BP	GO:0002503	peptide antigen assembly with MHC class II protein complex	2/256	12/23012	0.00755938	0.0402838	0.0281617	H2-Aa/H2-Eb1	2
GO:0009404	BP	GO:0009404	toxin metabolic process	2/256	12/23012	0.00755938	0.0402838	0.0281617	Gsta3/Fmo1	2
GO:0031392	BP	GO:0031392	regulation of prostaglandin biosynthetic process	2/256	12/23012	0.00755938	0.0402838	0.0281617	Cd74/Il1b	2
GO:0033625	BP	GO:0033625	positive regulation of integrin activation	2/256	12/23012	0.00755938	0.0402838	0.0281617	Fermt2/Rasip1	2
GO:0035810	BP	GO:0035810	positive regulation of urine volume	2/256	12/23012	0.00755938	0.0402838	0.0281617	Edn1/Npr3	2
GO:0036295	BP	GO:0036295	cellular response to increased oxygen levels	2/256	12/23012	0.00755938	0.0402838	0.0281617	Fas/Cav1	2
GO:0036302	BP	GO:0036302	atrioventricular canal development	2/256	12/23012	0.00755938	0.0402838	0.0281617	Eng/Tbx3	2
GO:0038063	BP	GO:0038063	collagen-activated tyrosine kinase receptor signaling pathway	2/256	12/23012	0.00755938	0.0402838	0.0281617	Tspan9/Col4a1	2
GO:0045654	BP	GO:0045654	positive regulation of megakaryocyte differentiation	2/256	12/23012	0.00755938	0.0402838	0.0281617	Rcor1/Gata2	2
GO:0050774	BP	GO:0050774	negative regulation of dendrite morphogenesis	2/256	12/23012	0.00755938	0.0402838	0.0281617	Id1/Cit	2
GO:0060215	BP	GO:0060215	primitive hemopoiesis	2/256	12/23012	0.00755938	0.0402838	0.0281617	Vegfa/Gata2	2
GO:0060426	BP	GO:0060426	lung vasculature development	2/256	12/23012	0.00755938	0.0402838	0.0281617	Id1/Vegfa	2
GO:0060872	BP	GO:0060872	semicircular canal development	2/256	12/23012	0.00755938	0.0402838	0.0281617	Gata2/Tbx3	2
GO:0061517	BP	GO:0061517	macrophage proliferation	2/256	12/23012	0.00755938	0.0402838	0.0281617	Csf1r/Csf1	2
GO:0061626	BP	GO:0061626	pharyngeal arch artery morphogenesis	2/256	12/23012	0.00755938	0.0402838	0.0281617	Edn1/Adgrf5	2
GO:0070262	BP	GO:0070262	peptidyl-serine dephosphorylation	2/256	12/23012	0.00755938	0.0402838	0.0281617	Ppm1f/Ppp1r16b	2
GO:0070831	BP	GO:0070831	basement membrane assembly	2/256	12/23012	0.00755938	0.0402838	0.0281617	Phldb2/Ramp2	2
GO:1900747	BP	GO:1900747	negative regulation of vascular endothelial growth factor signaling pathway	2/256	12/23012	0.00755938	0.0402838	0.0281617	Sema6a/Dab2ip	2
GO:0006801	BP	GO:0006801	superoxide metabolic process	4/256	70/23012	0.00772611	0.0410533	0.0286997	Edn1/Gstp1/Nos3/Mapt	4
GO:0035315	BP	GO:0035315	hair cell differentiation	4/256	70/23012	0.00772611	0.0410533	0.0286997	Ripor2/Gsdme/Clic5/Hey1	4
GO:0045787	BP	GO:0045787	positive regulation of cell cycle	10/256	363/23012	0.00775041	0.0411231	0.0287484	Edn1/Cenpe/Csf1r/Lgmn/Aif1/Stil/Meis2/Cit/Tbx3/Il1b	10
GO:0072163	BP	GO:0072163	mesonephric epithelium development	5/256	110/23012	0.00778278	0.0411688	0.0287804	Gsta3/Vegfa/Hey1/Smad6/Lama5	5
GO:0072164	BP	GO:0072164	mesonephric tubule development	5/256	110/23012	0.00778278	0.0411688	0.0287804	Gsta3/Vegfa/Hey1/Smad6/Lama5	5
GO:0007249	BP	GO:0007249	canonical NF-kappaB signal transduction	8/256	254/23012	0.00779263	0.0411688	0.0287804	Edn1/Nlrp12/Gstp1/Cd74/Tnfsf10/Dab2ip/Trim30b/Il1b	8
GO:0007435	BP	GO:0007435	salivary gland morphogenesis	3/256	37/23012	0.00799887	0.0420169	0.0293733	Nfib/Sema3c/Lama5	3
GO:0045746	BP	GO:0045746	negative regulation of Notch signaling pathway	3/256	37/23012	0.00799887	0.0420169	0.0293733	Hey1/Gata2/Egfl7	3
GO:0048169	BP	GO:0048169	regulation of long-term neuronal synaptic plasticity	3/256	37/23012	0.00799887	0.0420169	0.0293733	Shank3/Kit/Snca	3
GO:2000406	BP	GO:2000406	positive regulation of T cell migration	3/256	37/23012	0.00799887	0.0420169	0.0293733	Cxcl12/Aif1/Cxcl10	3
GO:0050807	BP	GO:0050807	regulation of synapse organization	9/256	309/23012	0.00801293	0.0420307	0.029383	Negr1/Shank3/Sema3f/Homer1/Snca/Ntn1/Arhgef15/Dab2ip/Apoe	9
GO:0001503	BP	GO:0001503	ossification	12/256	482/23012	0.00806796	0.0422503	0.0295365	Id1/Bmp6/Hdac7/Vegfa/Csf1r/Fermt2/Areg/S1pr1/Hey1/Igfbp5/Csf1/Smad6	12
GO:0019217	BP	GO:0019217	regulation of fatty acid metabolic process	5/256	111/23012	0.00807778	0.0422503	0.0295365	Cav1/Cd74/Snca/Fmo1/Il1b	5
GO:0042509	BP	GO:0042509	regulation of tyrosine phosphorylation of STAT protein	4/256	71/23012	0.00811732	0.0423969	0.0296389	Cav1/Kit/Csf1r/Pecam1	4
GO:0072593	BP	GO:0072593	reactive oxygen species metabolic process	8/256	256/23012	0.00815048	0.0425097	0.0297178	Edn1/Hba-a1/Gstp1/Snca/Nos3/Mapt/Hbb-bt/Hbb-b1	8
GO:0030900	BP	GO:0030900	forebrain development	11/256	424/23012	0.00822807	0.0428535	0.0299582	Shank3/Nfib/Aqp1/Ndst1/Csf1r/Dlc1/Cxcl12/Stil/Dab2ip/Gata2/Tbx3	11
GO:0071241	BP	GO:0071241	cellular response to inorganic substance	8/256	257/23012	0.00833397	0.0433437	0.0303008	Hfe/Fas/Bmp6/Aqp1/Lgmn/Snca/Slc40a1/Rasa4	8
GO:0061326	BP	GO:0061326	renal tubule development	5/256	112/23012	0.00838044	0.0435239	0.0304268	Aqp1/Vegfa/Col4a1/Hey1/Lama5	5
GO:0001764	BP	GO:0001764	neuron migration	7/256	206/23012	0.00844975	0.0438219	0.0306351	Vegfa/Sema6a/Ntn1/Cxcl12/Mapt/Dab2ip/Gata2	7
GO:0043506	BP	GO:0043506	regulation of JUN kinase activity	4/256	72/23012	0.00852131	0.0441147	0.0308398	Edn1/Gstp1/Dab2ip/Il1b	4
GO:0002724	BP	GO:0002724	regulation of T cell cytokine production	3/256	38/23012	0.00861418	0.0441147	0.0308398	Hfe/Tbx21/Il1b	3
GO:0006958	BP	GO:0006958	complement activation, classical pathway	3/256	38/23012	0.00861418	0.0441147	0.0308398	C1qb/C1qc/C1qa	3
GO:0014002	BP	GO:0014002	astrocyte development	3/256	38/23012	0.00861418	0.0441147	0.0308398	C1qa/Csf1r/Il1b	3
GO:0016339	BP	GO:0016339	calcium-dependent cell-cell adhesion via plasma membrane cell adhesion molecules	3/256	38/23012	0.00861418	0.0441147	0.0308398	Cdh13/Cdh5/Selp	3
GO:0019934	BP	GO:0019934	cGMP-mediated signaling	3/256	38/23012	0.00861418	0.0441147	0.0308398	Aqp1/Pde3a/Apoe	3
GO:0048013	BP	GO:0048013	ephrin receptor signaling pathway	3/256	38/23012	0.00861418	0.0441147	0.0308398	Efnb1/Efnb2/Ephb4	3
GO:0050901	BP	GO:0050901	leukocyte tethering or rolling	3/256	38/23012	0.00861418	0.0441147	0.0308398	Jam2/Cxcl12/Selp	3
GO:1902229	BP	GO:1902229	regulation of intrinsic apoptotic signaling pathway in response to DNA damage	3/256	38/23012	0.00861418	0.0441147	0.0308398	Cd74/Ackr3/Cxcl12	3
GO:0032368	BP	GO:0032368	regulation of lipid transport	6/256	158/23012	0.00862694	0.0441186	0.0308425	Edn1/Bmp6/Cav1/Retn/Apoe/Il1b	6
GO:0001823	BP	GO:0001823	mesonephros development	5/256	113/23012	0.00869088	0.0443839	0.031028	Gsta3/Vegfa/Hey1/Smad6/Lama5	5
GO:0001654	BP	GO:0001654	eye development	11/256	428/23012	0.00879105	0.0444885	0.0311011	Ptprm/Bmp6/Rhoj/Aldh1a1/Nfib/Aqp1/Vegfa/Col4a1/Arhgef15/Acvrl1/Meis2	11
GO:0002158	BP	GO:0002158	osteoclast proliferation	2/256	13/23012	0.00886866	0.0444885	0.0311011	Npr3/Csf1	2
GO:0002468	BP	GO:0002468	dendritic cell antigen processing and presentation	2/256	13/23012	0.00886866	0.0444885	0.0311011	Cd74/Fgl2	2
GO:0014029	BP	GO:0014029	neural crest formation	2/256	13/23012	0.00886866	0.0444885	0.0311011	Edn1/Tcof1	2
GO:0014745	BP	GO:0014745	negative regulation of muscle adaptation	2/256	13/23012	0.00886866	0.0444885	0.0311011	Nos3/Igfbp5	2
GO:0017038	BP	GO:0017038	protein import	2/256	13/23012	0.00886866	0.0444885	0.0311011	Gpihbp1/Apoe	2
GO:0031272	BP	GO:0031272	regulation of pseudopodium assembly	2/256	13/23012	0.00886866	0.0444885	0.0311011	Kit/Cdc42ep1	2
GO:0031274	BP	GO:0031274	positive regulation of pseudopodium assembly	2/256	13/23012	0.00886866	0.0444885	0.0311011	Kit/Cdc42ep1	2
GO:0034116	BP	GO:0034116	positive regulation of heterotypic cell-cell adhesion	2/256	13/23012	0.00886866	0.0444885	0.0311011	Gcnt2/Il1b	2
GO:0036005	BP	GO:0036005	response to macrophage colony-stimulating factor	2/256	13/23012	0.00886866	0.0444885	0.0311011	Csf1r/Csf1	2
GO:0036006	BP	GO:0036006	cellular response to macrophage colony-stimulating factor stimulus	2/256	13/23012	0.00886866	0.0444885	0.0311011	Csf1r/Csf1	2
GO:0071679	BP	GO:0071679	commissural neuron axon guidance	2/256	13/23012	0.00886866	0.0444885	0.0311011	Nfib/Vegfa	2
GO:1905063	BP	GO:1905063	regulation of vascular associated smooth muscle cell differentiation	2/256	13/23012	0.00886866	0.0444885	0.0311011	Kit/Eng	2
GO:0030032	BP	GO:0030032	lamellipodium assembly	4/256	73/23012	0.00893823	0.0446547	0.0312173	Kit/Cdh13/Aqp1/S1pr1	4
GO:0050805	BP	GO:0050805	negative regulation of synaptic transmission	4/256	73/23012	0.00893823	0.0446547	0.0312173	Shank3/Pcdh17/Mapt/Il1b	4
GO:1905330	BP	GO:1905330	regulation of morphogenesis of an epithelium	4/256	73/23012	0.00893823	0.0446547	0.0312173	Nkd1/Vegfa/Mmrn2/Cxcl10	4
GO:0046889	BP	GO:0046889	positive regulation of lipid biosynthetic process	5/256	114/23012	0.00900918	0.0449481	0.0314224	Bmp6/Adgrf5/Cd74/Apoe/Il1b	5
GO:0002699	BP	GO:0002699	positive regulation of immune effector process	9/256	316/23012	0.0091995	0.0458354	0.0320427	Hfe/Dnajb9/Kit/Cd74/Tek/H2-Q10/Tbx21/Gata2/Il1b	9
GO:0002763	BP	GO:0002763	positive regulation of myeloid leukocyte differentiation	4/256	74/23012	0.00936824	0.046605	0.0325808	Cd74/Csf1r/Kitl/Csf1	4
GO:0050803	BP	GO:0050803	regulation of synapse structure or activity	9/256	317/23012	0.00937931	0.046605	0.0325808	Negr1/Shank3/Sema3f/Homer1/Snca/Ntn1/Arhgef15/Dab2ip/Apoe	9
GO:0071453	BP	GO:0071453	cellular response to oxygen levels	6/256	161/23012	0.00941496	0.046719	0.0326604	Egln3/Fas/Cav1/Aqp1/Vegfa/Epas1	6
GO:0001708	BP	GO:0001708	cell fate specification	5/256	116/23012	0.00966976	0.0479187	0.0334991	Nfib/Sox18/Tbx21/Myl2/Tbx3	5
GO:0072006	BP	GO:0072006	nephron development	6/256	162/23012	0.00968868	0.0479479	0.0335195	Aqp1/Nid1/Vegfa/Tek/Hey1/Lama5	6
GO:1902107	BP	GO:1902107	positive regulation of leukocyte differentiation	7/256	212/23012	0.00980244	0.0483604	0.0338079	Cd83/H2-Aa/Cd74/Csf1r/Kitl/Csf1/Sox13	7
GO:1903708	BP	GO:1903708	positive regulation of hemopoiesis	7/256	212/23012	0.00980244	0.0483604	0.0338079	Cd83/H2-Aa/Cd74/Csf1r/Kitl/Csf1/Sox13	7
GO:0007260	BP	GO:0007260	tyrosine phosphorylation of STAT protein	4/256	75/23012	0.0098115	0.0483604	0.0338079	Cav1/Kit/Csf1r/Pecam1	4
GO:0032886	BP	GO:0032886	regulation of microtubule-based process	8/256	265/23012	0.00991544	0.048535	0.03393	Phldb2/Ripor2/Cav1/Stmn2/Snca/Cdh5/Mapt/Stil	8
GO:0006026	BP	GO:0006026	aminoglycan catabolic process	3/256	40/23012	0.00992612	0.048535	0.03393	Hexb/Cemip2/Lyve1	3
GO:0010714	BP	GO:0010714	positive regulation of collagen metabolic process	3/256	40/23012	0.00992612	0.048535	0.03393	Ltbp1/Retn/Eng	3
GO:0030513	BP	GO:0030513	positive regulation of BMP signaling pathway	3/256	40/23012	0.00992612	0.048535	0.03393	Cdh5/Acvrl1/Eng	3
GO:0090162	BP	GO:0090162	establishment of epithelial cell polarity	3/256	40/23012	0.00992612	0.048535	0.03393	Amotl1/Pard3/Hey1	3
GO:2000273	BP	GO:2000273	positive regulation of signaling receptor activity	3/256	40/23012	0.00992612	0.048535	0.03393	Edn1/Hfe/Shank3	3
GO:0051147	BP	GO:0051147	regulation of muscle cell differentiation	6/256	163/23012	0.00996803	0.0486107	0.0339829	Edn1/Kit/Nid1/Csf1r/Efnb2/Eng	6
GO:1904019	BP	GO:1904019	epithelial cell apoptotic process	6/256	163/23012	0.00996803	0.0486107	0.0339829	Fas/Id1/Ramp2/Tek/Cdh5/Gata2	6
GO:0043122	BP	GO:0043122	regulation of canonical NF-kappaB signal transduction	7/256	213/23012	0.0100424	0.0489085	0.0341911	Nlrp12/Gstp1/Cd74/Tnfsf10/Dab2ip/Trim30b/Il1b	7
GO:0007613	BP	GO:0007613	memory	6/256	164/23012	0.0102531	0.0493053	0.0344685	Shank3/Csmd1/Lgmn/Mapt/Apoe/Il1b	6
GO:0007585	BP	GO:0007585	respiratory gaseous exchange by respiratory system	4/256	76/23012	0.0102682	0.0493053	0.0344685	Edn1/Ndst1/Mafb/Chst11	4
GO:0002551	BP	GO:0002551	mast cell chemotaxis	2/256	14/23012	0.0102714	0.0493053	0.0344685	Kit/Vegfa	2
GO:0036296	BP	GO:0036296	response to increased oxygen levels	2/256	14/23012	0.0102714	0.0493053	0.0344685	Fas/Cav1	2
GO:0045060	BP	GO:0045060	negative thymic T cell selection	2/256	14/23012	0.0102714	0.0493053	0.0344685	Fas/Cd74	2
GO:0061309	BP	GO:0061309	cardiac neural crest cell development involved in outflow tract morphogenesis	2/256	14/23012	0.0102714	0.0493053	0.0344685	Edn1/Sema3c	2
GO:0097113	BP	GO:0097113	AMPA glutamate receptor clustering	2/256	14/23012	0.0102714	0.0493053	0.0344685	Shank3/Apoe	2
GO:0097688	BP	GO:0097688	glutamate receptor clustering	2/256	14/23012	0.0102714	0.0493053	0.0344685	Shank3/Apoe	2
GO:1902548	BP	GO:1902548	negative regulation of cellular response to vascular endothelial growth factor stimulus	2/256	14/23012	0.0102714	0.0493053	0.0344685	Sema6a/Dab2ip	2
GO:2000822	BP	GO:2000822	regulation of behavioral fear response	2/256	14/23012	0.0102714	0.0493053	0.0344685	Shank3/Apoe	2
GO:2001279	BP	GO:2001279	regulation of unsaturated fatty acid biosynthetic process	2/256	14/23012	0.0102714	0.0493053	0.0344685	Cd74/Il1b	2
GO:0006939	BP	GO:0006939	smooth muscle contraction	5/256	118/23012	0.0103629	0.0496798	0.0347303	Myh11/Edn1/Cav1/Kit/Tbx3	5
GO:0005901	CC	GO:0005901	caveola	10/262	97/22778	1.78426791761167e-07	2.48507090372713e-05	2.07123625049149e-05	Cavin2/Cav2/Cav1/Plpp1/Cdh13/Aqp1/Nos3/Dlc1/Plvap/Cavin1	10
GO:0062023	CC	GO:0062023	collagen-containing extracellular matrix	19/262	395/22778	1.81277294989577e-07	2.48507090372713e-05	2.07123625049149e-05	Timp3/Vwf/Tspan9/Ltbp1/Nid1/Vegfa/Plxdc2/Mmrn2/Sema3c/Col4a1/Fgl2/Clec14a/Serpinh1/Ntn1/Sftpa1/Hmcn1/Eln/Egfl7/Lama5	19
GO:0005912	CC	GO:0005912	adherens junction	12/262	154/22778	2.35180211709192e-07	2.48507090372713e-05	2.07123625049149e-05	Ptprm/Tjp1/Esam/Jcad/Cdh13/Vegfa/Frmd5/Fermt2/Cdh5/Pard3/Hmcn1/Ccdc85a	12
GO:0045121	CC	GO:0045121	membrane raft	16/262	301/22778	4.6393395962503e-07	3.07430910533309e-05	2.56234961128543e-05	Fas/Cavin2/Cav2/Cav1/Plpp1/Cdh13/Aqp1/Efnb1/Tek/Serpinh1/Nos3/Dlc1/Plvap/Mapt/Pecam1/Cavin1	16
GO:0098857	CC	GO:0098857	membrane microdomain	16/262	302/22778	4.84906798948438e-07	3.07430910533309e-05	2.56234961128543e-05	Fas/Cavin2/Cav2/Cav1/Plpp1/Cdh13/Aqp1/Efnb1/Tek/Serpinh1/Nos3/Dlc1/Plvap/Mapt/Pecam1/Cavin1	16
GO:0005833	CC	GO:0005833	hemoglobin complex	4/262	10/22778	3.40238303776066e-06	0.00016148	0.000134589	Hba-a1/Hba-a2/Hbb-bt/Hbb-b1	4
GO:0044853	CC	GO:0044853	plasma membrane raft	10/262	134/22778	3.56579437942755e-06	0.00016148	0.000134589	Cavin2/Cav2/Cav1/Plpp1/Cdh13/Aqp1/Nos3/Dlc1/Plvap/Cavin1	10
GO:0031838	CC	GO:0031838	haptoglobin-hemoglobin complex	4/262	11/22778	5.29824661306149e-06	0.000209943	0.000174982	Hba-a1/Hba-a2/Hbb-bt/Hbb-b1	4
GO:0031252	CC	GO:0031252	cell leading edge	16/262	413/22778	2.60714654161421e-05	0.000918295	0.000765373	Ston1/Phldb2/Ripor2/Ptprk/Ptprm/Sptbn1/Amotl1/Jcad/Stmn2/Dlc1/Podxl/Mapt/Aif1/Kitl/Cit/Pecam1	16
GO:0005604	CC	GO:0005604	basement membrane	8/262	114/22778	5.29803781102063e-05	0.00167948	0.0013998	Timp3/Nid1/Vegfa/Mmrn2/Col4a1/Ntn1/Hmcn1/Lama5	8
GO:0042613	CC	GO:0042613	MHC class II protein complex	3/262	13/22778	0.000395078	0.0108703	0.00906013	H2-Aa/H2-Eb1/Cd74	3
GO:0045178	CC	GO:0045178	basal part of cell	12/262	325/22778	0.000411496	0.0108703	0.00906013	Edn1/Hfe/Phldb2/Tjp1/Cav1/Aqp1/Tek/Slco2a1/Aqp9/Gpihbp1/Slc40a1/Slc43a3	12
GO:0030141	CC	GO:0030141	secretory granule	15/262	478/22778	0.000460143	0.0112204	0.0093519	Hexb/Edn1/Fas/Cav2/Cav1/Vwf/Plat/Kit/Aqp1/Vegfa/Snca/Sftpc/Ece1/Selp/Il1b	15
GO:0042611	CC	GO:0042611	MHC protein complex	4/262	40/22778	0.00112904	0.0255647	0.0213074	H2-Aa/H2-Eb1/Cd74/H2-Q10	4
GO:0005923	CC	GO:0005923	bicellular tight junction	7/262	142/22778	0.00130908	0.0271993	0.0226699	Tjp1/Esam/Amotl1/Jam2/Amotl2/Cdh5/Pard3	7
GO:0030055	CC	GO:0030055	cell-substrate junction	8/262	186/22778	0.00144801	0.0271993	0.0226699	Phldb2/Cav2/Cav1/Tns2/Fermt2/Dlc1/Hmcn1/Il1rl1	8
GO:0016324	CC	GO:0016324	apical plasma membrane	13/262	428/22778	0.00145864	0.0271993	0.0226699	Fas/Ripor2/Tjp1/Cav1/Amotl1/Plpp1/Aqp1/Tek/Amotl2/Pard3/Podxl/Slc34a2/Gpihbp1	13
GO:0070160	CC	GO:0070160	tight junction	7/262	152/22778	0.00193324	0.0340465	0.0283768	Tjp1/Esam/Amotl1/Jam2/Amotl2/Cdh5/Pard3	7
GO:0031256	CC	GO:0031256	leading edge membrane	7/262	159/22778	0.00249216	0.0415796	0.0346555	Ripor2/Ptprk/Sptbn1/Jcad/Dlc1/Mapt/Aif1	7
GO:0005938	CC	GO:0005938	cell cortex	10/262	307/22778	0.00307381	0.0451512	0.0376323	Hfe/Phldb2/Cav1/Sptbn1/Crip2/Snca/Pard3/Dlc1/Hmcn1/Myzap	10
GO:0016327	CC	GO:0016327	apicolateral plasma membrane	3/262	26/22778	0.00321629	0.0451512	0.0376323	Tjp1/Prickle2/Thbd	3
GO:0043296	CC	GO:0043296	apical junction complex	7/262	167/22778	0.00327483	0.0451512	0.0376323	Tjp1/Esam/Amotl1/Jam2/Amotl2/Cdh5/Pard3	7
GO:0043235	CC	GO:0043235	receptor complex	12/262	415/22778	0.00327596	0.0451512	0.0376323	Hfe/Kit/Cd74/Ramp2/Tek/Csf1r/Tie1/Acvrl1/Ghr/Ptprb/Ephb4/Eng	12
GO:0030667	CC	GO:0030667	secretory granule membrane	5/262	88/22778	0.00349434	0.0461544	0.0384684	Cav2/Cav1/Aqp1/Snca/Selp	5
GO:0050839	MF	GO:0050839	cell adhesion molecule binding	15/252	307/22543	2.1206041179501e-06	0.000708136	0.000553954	Ptprm/Tjp1/Esam/Vwf/Cdh13/Frmd5/Jam2/Fermt2/Cdh5/Nos3/Cxcl12/Ptprb/Bcam/Lama5/Il1b	15
GO:0031720	MF	GO:0031720	haptoglobin binding	4/252	10/22543	3.03726113447119e-06	0.000708136	0.000553954	Hba-a1/Hba-a2/Hbb-bt/Hbb-b1	4
GO:0019838	MF	GO:0019838	growth factor binding	10/252	146/22543	5.96324819169071e-06	0.000708136	0.000553954	Kit/Ltbp1/Vegfa/Tek/Csf1r/Col4a1/Acvrl1/Ghr/Igfbp5/Eng	10
GO:0019955	MF	GO:0019955	cytokine binding	10/252	146/22543	5.96324819169071e-06	0.000708136	0.000553954	Kit/Ltbp1/Cd74/Csf1r/Ackr3/Acvrl1/Ghr/Il1rl1/Cxcr2/Eng	10
GO:0019199	MF	GO:0019199	transmembrane receptor protein kinase activity	7/252	76/22543	2.275392569125e-05	0.00216162	0.00169098	Kit/Tek/Csf1r/Tie1/Acvrl1/Ephb4/Eng	7
GO:0005201	MF	GO:0005201	extracellular matrix structural constituent	9/252	145/22543	3.82431769271171e-05	0.00302758	0.00236839	Vwf/Ltbp1/Nid1/Mmrn2/Col4a1/Ntn1/Hmcn1/Eln/Lama5	9
GO:0005125	MF	GO:0005125	cytokine activity	11/252	233/22543	6.71076285570337e-05	0.00400692	0.0031345	Edn1/Bmp6/Vegfa/Tnfsf10/Cxcl12/Cxcl15/Areg/Cxcl10/Kitl/Csf1/Il1b	11
GO:0005126	MF	GO:0005126	cytokine receptor binding	13/252	319/22543	6.74850211482759e-05	0.00400692	0.0031345	Vegfa/Fermt2/Cdh5/Tnfsf10/Cxcl12/Cxcl15/Cxcl10/Kitl/Csf1/Smad6/Dab2ip/Eng/Il1b	13
GO:0030215	MF	GO:0030215	semaphorin receptor binding	4/252	22/22543	9.51873245667489e-05	0.00502378	0.00392996	Sema3f/Sema3g/Sema6a/Sema3c	4
GO:0005344	MF	GO:0005344	oxygen carrier activity	3/252	12/22543	0.000281844	0.00938562	0.0073421	Hba-a1/Hbb-bt/Hbb-b1	3
GO:0034713	MF	GO:0034713	type I transforming growth factor beta receptor binding	3/252	12/22543	0.000281844	0.00938562	0.0073421	Fermt2/Smad6/Eng	3
GO:0045499	MF	GO:0045499	chemorepellent activity	4/252	29/22543	0.000290644	0.00938562	0.0073421	Sema3f/Sema3g/Sema6a/Sema3c	4
GO:0033612	MF	GO:0033612	receptor serine/threonine kinase binding	4/252	31/22543	0.000378351	0.00938562	0.0073421	Bmp6/Cav1/Cdh5/Smad6	4
GO:0071813	MF	GO:0071813	lipoprotein particle binding	4/252	31/22543	0.000378351	0.00938562	0.0073421	Cdh13/Mapt/Gpihbp1/Apoe	4
GO:0071814	MF	GO:0071814	protein-lipid complex binding	4/252	31/22543	0.000378351	0.00938562	0.0073421	Cdh13/Mapt/Gpihbp1/Apoe	4
GO:0016209	MF	GO:0016209	antioxidant activity	6/252	85/22543	0.000384617	0.00938562	0.0073421	Hba-a1/Hba-a2/Gstp1/Hbb-bt/Hbb-b1/Apoe	6
GO:0015631	MF	GO:0015631	tubulin binding	13/252	385/22543	0.00042471	0.00938562	0.0073421	Reep1/Cenpe/Stmn2/Kif4/Slc6a2/Snca/Spatc1/Eml1/Mtus1/Ttll7/Mapt/Cnn3/Kif15	13
GO:0042562	MF	GO:0042562	hormone binding	6/252	87/22543	0.000435933	0.00938562	0.0073421	Npr3/Cdh13/Ramp2/Pde3a/Ghr/Slc40a1	6
GO:0004601	MF	GO:0004601	peroxidase activity	5/252	57/22543	0.000437283	0.00938562	0.0073421	Hba-a1/Hba-a2/Gstp1/Hbb-bt/Hbb-b1	5
GO:0023026	MF	GO:0023026	MHC class II protein complex binding	3/252	14/22543	0.000458667	0.00938562	0.0073421	H2-Aa/H2-Eb1/Cd74	3
GO:0030550	MF	GO:0030550	acetylcholine receptor inhibitor activity	3/252	14/22543	0.000458667	0.00938562	0.0073421	Ly6a/Ly6c1/Gpihbp1	3
GO:0045236	MF	GO:0045236	CXCR chemokine receptor binding	3/252	14/22543	0.000458667	0.00938562	0.0073421	Cxcl12/Cxcl15/Cxcl10	3
GO:0097110	MF	GO:0097110	scaffold protein binding	6/252	88/22543	0.000463515	0.00938562	0.0073421	Shank3/Cav2/Homer1/Tcof1/Nos3/Cit	6
GO:0004714	MF	GO:0004714	transmembrane receptor protein tyrosine kinase activity	5/252	58/22543	0.000474221	0.00938562	0.0073421	Kit/Tek/Csf1r/Tie1/Ephb4	5
GO:0016684	MF	GO:0016684	oxidoreductase activity, acting on peroxide as acceptor	5/252	59/22543	0.000513458	0.00975571	0.00763161	Hba-a1/Hba-a2/Gstp1/Hbb-bt/Hbb-b1	5
GO:0004725	MF	GO:0004725	protein tyrosine phosphatase activity	6/252	93/22543	0.000622448	0.0113716	0.00889572	Ptprk/Ptprm/Tns2/Ptpn14/Ptprg/Ptprb	6
GO:0005172	MF	GO:0005172	vascular endothelial growth factor receptor binding	3/252	16/22543	0.000694067	0.0122104	0.00955188	Vegfa/Cdh5/Dab2ip	3
GO:0045296	MF	GO:0045296	cadherin binding	5/252	70/22543	0.00112376	0.0190637	0.014913	Ptprm/Cdh13/Cdh5/Nos3/Ptprb	5
GO:0001664	MF	GO:0001664	G protein-coupled receptor binding	11/252	332/22543	0.00135295	0.0221604	0.0173355	Edn1/Reep1/Shank3/Cav2/Hba-a1/Hba-a2/Homer1/Cxcl12/Cxcl15/S1pr1/Cxcl10	11
GO:0005547	MF	GO:0005547	phosphatidylinositol-3,4,5-trisphosphate binding	4/252	46/22543	0.0017212	0.0269636	0.0210928	Arap3/Fermt2/Pard3/Adap2	4
GO:0005178	MF	GO:0005178	integrin binding	7/252	154/22543	0.00177121	0.0269636	0.0210928	Vwf/Frmd5/Jam2/Fermt2/Cxcl12/Lama5/Il1b	7
GO:0050998	MF	GO:0050998	nitric-oxide synthase binding	3/252	22/22543	0.00181649	0.0269636	0.0210928	Cav1/Cd74/Nos3	3
GO:0023023	MF	GO:0023023	MHC protein complex binding	3/252	23/22543	0.00207183	0.0281177	0.0219957	H2-Aa/H2-Eb1/Cd74	3
GO:0070696	MF	GO:0070696	transmembrane receptor protein serine/threonine kinase binding	3/252	23/22543	0.00207183	0.0281177	0.0219957	Bmp6/Cdh5/Smad6	3
GO:0140416	MF	GO:0140416	transcription regulator inhibitor activity	3/252	23/22543	0.00207183	0.0281177	0.0219957	Id1/Nfib/Smad6	3
GO:0071889	MF	GO:0071889	14-3-3 protein binding	4/252	50/22543	0.00234596	0.029355	0.0229636	Ripor2/Hdac7/H2-Q10/Dab2ip	4
GO:0019825	MF	GO:0019825	oxygen binding	3/252	24/22543	0.0023484	0.029355	0.0229636	Hba-a1/Hbb-bt/Hbb-b1	3
GO:0050431	MF	GO:0050431	transforming growth factor beta binding	3/252	24/22543	0.0023484	0.029355	0.0229636	Ltbp1/Acvrl1/Eng	3
GO:0004721	MF	GO:0004721	phosphoprotein phosphatase activity	7/252	163/22543	0.00244181	0.02974	0.0232648	Ppm1f/Ptprk/Ptprm/Tns2/Ptpn14/Ptprg/Ptprb	7
GO:0017046	MF	GO:0017046	peptide hormone binding	4/252	51/22543	0.00252357	0.0299674	0.0234426	Npr3/Ramp2/Ghr/Slc40a1	4
GO:0030548	MF	GO:0030548	acetylcholine receptor regulator activity	3/252	27/22543	0.00331113	0.0367051	0.0287133	Ly6a/Ly6c1/Gpihbp1	3
GO:0099602	MF	GO:0099602	neurotransmitter receptor regulator activity	3/252	27/22543	0.00331113	0.0367051	0.0287133	Ly6a/Ly6c1/Gpihbp1	3
GO:0008017	MF	GO:0008017	microtubule binding	9/252	268/22543	0.00332277	0.0367051	0.0287133	Reep1/Cenpe/Kif4/Snca/Eml1/Mtus1/Mapt/Cnn3/Kif15	9
GO:0005160	MF	GO:0005160	transforming growth factor beta receptor binding	3/252	28/22543	0.00367813	0.0397071	0.0310617	Fermt2/Smad6/Eng	3
GO:0005543	MF	GO:0005543	phospholipid binding	13/252	492/22543	0.00378158	0.0399167	0.0312257	Cavin2/Gsdme/Sptbn1/Pitpnm2/Epn2/Arap3/Fermt2/Snca/Pard3/Adap2/Rasa4/Dab2ip/Apoe	13
GO:0050840	MF	GO:0050840	extracellular matrix binding	4/252	58/22543	0.0040317	0.0416317	0.0325673	Nid1/Clec14a/Eln/Bcam	4
GO:0016798	MF	GO:0016798	hydrolase activity, acting on glycosyl bonds	6/252	137/22543	0.00447407	0.0437006	0.0341858	Hexb/Neil3/Cemip2/Man1a/Acer2/Il1rl1	6
GO:0004896	MF	GO:0004896	cytokine receptor activity	5/252	96/22543	0.00449143	0.0437006	0.0341858	Cd74/Ackr3/Ghr/Il1rl1/Cxcr2	5
GO:0030246	MF	GO:0030246	carbohydrate binding	9/252	281/22543	0.00452451	0.0437006	0.0341858	Egln3/Hexb/H2-Eb1/Galnt18/Clec14a/Clec1a/Selp/Cd93/Eng	9
GO:0043177	MF	GO:0043177	organic acid binding	8/252	231/22543	0.00460007	0.0437006	0.0341858	Egln3/Hba-a1/Gstp1/Snca/Nos3/Selp/Hbb-bt/Hbb-b1	8
GO:0140375	MF	GO:0140375	immune receptor activity	6/252	139/22543	0.0047996	0.0447022	0.0349692	H2-Eb1/Cd74/Ackr3/Ghr/Il1rl1/Cxcr2	6
GO:0046875	MF	GO:0046875	ephrin receptor binding	3/252	32/22543	0.00538912	0.0491825	0.0384741	Aqp1/Efnb1/Efnb2	3
GO:0005096	MF	GO:0005096	GTPase activator activity	8/252	238/22543	0.00548773	0.0491825	0.0384741	Rasgrp3/Arap3/Adap2/Dlc1/Arhgef15/Arhgap29/Rasa4/Dab2ip	8

## Sheet: File 1e
Supplementary File 1e: DESeq2 results showing the significant (p<0.05) DEGs in the myeloid cell cluster from mouse lungs exposed to 5-day nose-only exposure to fruit-flavored ecig aerosol when compared to air control.
	baseMean	log2FoldChange	lfcSE	stat	pvalue	padj
Hbb-bt	3801.24	9.01061	1.86105	4.84168	1.29E-06	0.00103822
Hba-a1	5476.75	7.16553	1.69915	4.21712	2.47E-05	0.00831399
Hba-a2	4437.1	7.09911	1.66661	4.25962	2.05E-05	0.00750605
Hbb-bs	14667.4	6.72873	1.85661	3.6242	0.000289853	0.0486953
Cirbp	1045.44	1.1887	0.267443	4.44469	8.80E-06	0.00443621
Hs6st1	1045.64	0.827664	0.223159	3.70884	0.000208208	0.0424224
Malt1	2919.94	0.748213	0.145871	5.12928	2.91E-07	0.000586365
Stap1	1115.67	0.740633	0.1646	4.49959	6.81E-06	0.0039216
Neurl3	1175.74	0.734614	0.169165	4.34258	1.41E-05	0.00616175
Hist1h1c	1349.53	0.729286	0.168637	4.32458	1.53E-05	0.00616175
Egr1	3572.64	0.70095	0.152355	4.60077	4.21E-06	0.00282872
Nr4a1	3489.01	0.68488	0.169326	4.04473	5.24E-05	0.0162466
Arih2	1787.09	0.539437	0.139799	3.85867	0.000114006	0.0306448
Rps29	43441.7	0.444541	0.120394	3.69239	0.000222158	0.0426542
Dusp5	1681.95	0.43572	0.117567	3.70616	0.000210428	0.0424224
Rpl38	21484.1	0.421966	0.111439	3.78653	0.000152765	0.0362323
Rps21	24573.2	0.367363	0.100808	3.6442	0.000268226	0.0476432
Gmds	3381.36	-0.52752	0.138517	-3.80835	0.000139898	0.0352543
Htr2c	4069.4	-0.552761	0.113452	-4.87218	1.10E-06	0.00103822
Mitf	3170.56	-0.589448	0.149211	-3.95043	7.80E-05	0.0224668
Morrbid	2337.15	-0.608075	0.167016	-3.64082	0.000271774	0.0476432
Tfec	1275.08	-0.734502	0.147806	-4.96936	6.72E-07	0.000902824
Rad51b	660.696	-0.74997	0.199312	-3.76279	0.00016803	0.0376388
Egfem1	4037.37	-1.24104	0.155634	-7.9741	1.53E-15	6.19E-12

## Sheet: File 1f
Supplementary File 1f: GO analyses results of the (a) upregulated DEGs (log2fold change > 0.5) and (b) downregulated DEGs (log2fold change < -0.5) in the myeloid cell cluster from mouse lungs exposed to 5-day nose-only exposure to fruit-flavored e-cig aerosols when compared to air control.
(a) Upregulated DEGs
	ONTOLOGY	ID	Description	GeneRatio	BgRatio	RichFactor	FoldEnrichment	zScore	pvalue	p.adjust	qvalue	geneID	Count
GO:0002423	BP	GO:0002423	natural killer cell mediated immune response to tumor cell	8/1454	13/23040	0.615385	9.75135	8.19136	2.38710128973416e-07	0.000267854	0.000237536	Ceacam1/Cd160/Il12b/Klre1/Havcr2/Klrk1/Il12a/Nkg7	8
GO:0002420	BP	GO:0002420	natural killer cell mediated cytotoxicity directed against tumor cell target	7/1454	12/23040	0.583333	9.24347	7.41311	2.34891083726881e-06	0.000872285	0.000773551	Ceacam1/Il12b/Klre1/Havcr2/Klrk1/Il12a/Nkg7	7
GO:0002855	BP	GO:0002855	regulation of natural killer cell mediated immune response to tumor cell	7/1454	12/23040	0.583333	9.24347	7.41311	2.34891083726881e-06	0.000872285	0.000773551	Ceacam1/Cd160/Il12b/Klre1/Havcr2/Klrk1/Il12a	7
GO:0002858	BP	GO:0002858	regulation of natural killer cell mediated cytotoxicity directed against tumor cell target	6/1454	11/23040	0.545455	8.64324	6.58058	2.19251029053157e-05	0.0051813	0.00459483	Ceacam1/Il12b/Klre1/Havcr2/Klrk1/Il12a	6
GO:0008046	MF	GO:0008046	axon guidance receptor activity	6/1453	11/22548	0.545455	8.46449	6.49884	2.47057602268312e-05	0.0027871	0.0025037	Robo1/Ephb3/Ephb1/Epha7/L1cam/Robo2	6
GO:0005833	CC	GO:0005833	hemoglobin complex	5/1470	10/22834	0.5	7.76667	5.61407	0.000210551	0.00778467	0.00687827	Hba-a1/Hba-a2/Hbq1a/Hbb-bt/Hbb-b1	5
GO:0031720	MF	GO:0031720	haptoglobin binding	5/1453	10/22548	0.5	7.75912	5.61074	0.000211505	0.00961846	0.00864045	Hba-a1/Hba-a2/Hbq1a/Hbb-bt/Hbb-b1	5
GO:0009068	BP	GO:0009068	aspartate family amino acid catabolic process	6/1454	13/23040	0.461538	7.31351	5.90952	7.29502806674333e-05	0.011493	0.0101921	Tdh/Ddo/Gcat/Gcat/Pipox/Sdsl	6
GO:0031838	CC	GO:0031838	haptoglobin-hemoglobin complex	5/1470	11/22834	0.454545	7.06061	5.27382	0.000365533	0.0112455	0.00993617	Hba-a1/Hba-a2/Hbq1a/Hbb-bt/Hbb-b1	5
GO:0005005	MF	GO:0005005	transmembrane-ephrin receptor activity	5/1453	11/22548	0.454545	7.05374	5.2706	0.000367172	0.014026	0.0125998	Ephb3/Epha10/Ephb1/Epha7/Ephb6	5
GO:0005344	MF	GO:0005344	oxygen carrier activity	5/1453	12/22548	0.416667	6.46593	4.97054	0.000596074	0.0179078	0.0160869	Hba-a1/Hbq1a/Mb/Hbb-bt/Hbb-b1	5
GO:0015269	MF	GO:0015269	calcium-activated potassium channel activity	5/1453	12/22548	0.416667	6.46593	4.97054	0.000596074	0.0179078	0.0160869	Kcnn2/Kcnma1/Kcnmb2/Kcnmb3/Kcnn1	5
GO:0015669	BP	GO:0015669	gas transport	7/1454	18/23040	0.388889	6.16231	5.68639	6.73926691172283e-05	0.0113024	0.0100231	Hba-a1/Car2/Rhag/Bpgm/Mb/Aqp5/Hbb-b1	7
GO:0033689	BP	GO:0033689	negative regulation of osteoblast proliferation	5/1454	13/23040	0.384615	6.09459	4.76859	0.000834017	0.046509	0.0412447	Sfrp1/Tnn/Smad3/Nell1/Bcl2	5
GO:0048340	BP	GO:0048340	paraxial mesoderm morphogenesis	5/1454	13/23040	0.384615	6.09459	4.76859	0.000834017	0.046509	0.0412447	Wnt5a/Lef1/Smad3/Foxc2/Wnt11	5
GO:0019825	MF	GO:0019825	oxygen binding	7/1453	21/22548	0.333333	5.17275	5.02074	0.000236979	0.0102871	0.00924106	Tdo2/Hba-a1/Hbq1a/Haao/Mb/Hbb-bt/Hbb-b1	7
GO:0048019	MF	GO:0048019	receptor antagonist activity	5/1453	15/22548	0.333333	5.17275	4.24273	0.00192054	0.0438504	0.0393917	Dkk2/Fst/Adh7/Dkkl1/Wfikkn2	5
GO:0045198	BP	GO:0045198	establishment of epithelial cell apical/basal polarity	6/1454	19/23040	0.315789	5.00398	4.53142	0.000830539	0.046509	0.0412447	Spag6l/Wnt5a/Lama1/Camsap3/Syne4/Tcf15	6
GO:0033270	CC	GO:0033270	paranode region of axon	5/1470	16/22834	0.3125	4.85417	4.0453	0.00263534	0.0492244	0.043493	Epb41l3/Ncmap/Nfasc/Gjc2/Scn2a	5
GO:0019755	BP	GO:0019755	one-carbon compound transport	7/1454	24/23040	0.291667	4.62173	4.60718	0.000524414	0.037471	0.0332297	Slc14a1/Hba-a1/Car2/Rhag/Aqp3/Aqp5/Hbb-b1	7
GO:0048339	BP	GO:0048339	paraxial mesoderm development	7/1454	24/23040	0.291667	4.62173	4.60718	0.000524414	0.037471	0.0332297	Wnt5a/Lef1/Smad3/Foxc2/Dll3/Tcf15/Wnt11	7
GO:0015125	MF	GO:0015125	bile acid transmembrane transporter activity	7/1453	24/22548	0.291667	4.52615	4.53598	0.000594677	0.0179078	0.0160869	Slco1c1/Slco1b2/Slco1a6/Ceacam1/Ceacam2/Slc51a/Abcb11	7
GO:0007214	BP	GO:0007214	gamma-aminobutyric acid signaling pathway	9/1454	32/23040	0.28125	4.45667	5.07834	0.000115331	0.0150381	0.0133359	Gabre/Gabra3/Htr4/Slc12a2/Atp1a3/Gabbr2/Phf24/Gabrd/Shisa7	9
GO:0051281	BP	GO:0051281	positive regulation of release of sequestered calcium ion into cytosol	11/1454	41/23040	0.268293	4.25135	5.40791	3.30534625776726e-05	0.00660942	0.0058613	Cd19/Trdn/Gpr39/F2/Snca/Gstm7/Cxcl9/Bdkrb1/Gper1/Casq1/Il13	11
GO:0060343	BP	GO:0060343	trabecula formation	8/1454	30/23040	0.266667	4.22558	4.58816	0.000413013	0.0335508	0.0297532	Hey2/Tgfbr3/Sfrp1/Mmp2/Bmp10/Wnt10b/Fhl2/Col1a1	8
GO:0033688	BP	GO:0033688	regulation of osteoblast proliferation	8/1454	31/23040	0.258065	4.08928	4.46701	0.000526136	0.037471	0.0332297	Sfrp1/Tnn/Smad3/Gata1/Nell1/Bcl2/Bmp2/Hpse	8
GO:0003156	BP	GO:0003156	regulation of animal organ formation	8/1454	32/23040	0.25	3.96149	4.35084	0.000663071	0.0420403	0.0372818	Wnt5a/Fgf2/Sulf1/Six1/Robo1/Fgfr4/Robo2/Bmp2	8
GO:0070098	BP	GO:0070098	chemokine-mediated signaling pathway	17/1454	69/23040	0.246377	3.90407	6.27004	9.39667254630546e-07	0.000610666	0.000541545	Robo1/Mpl/Slit2/Ppbp/Cxcl3/Gpr35/Ccrl2/Cxcl9/Ccl19/Ackr1/Ccl4/Cxcl13/Ccl11/Ccl12/Cxcl17/Padi2/Gpr75	17
GO:0030547	MF	GO:0030547	signaling receptor inhibitor activity	9/1453	36/22548	0.25	3.87956	4.53793	0.000359407	0.014026	0.0125998	Lypd1/Dkk2/Fst/Adh7/Ly6i/Ly6g6d/Pcsk9/Dkkl1/Wfikkn2	9
GO:0030020	MF	GO:0030020	extracellular matrix structural constituent conferring tensile strength	11/1453	45/22548	0.244444	3.79335	4.92264	0.000101378	0.00537864	0.00483174	Col12a1/Col3a1/Col4a4/Col25a1/Col17a1/Colq/Col9a2/Col8a1/Col13a1/Col1a1/Col16a1	11
GO:0022839	MF	GO:0022839	monoatomic ion-gated channel activity	7/1453	29/22548	0.241379	3.74578	3.88309	0.00202033	0.0438504	0.0393917	Kcnn2/Asic1/Kcnma1/Kcnmb2/Kcnmb3/Kcnn1/Catsper4	7
GO:0098632	MF	GO:0098632	cell-cell adhesion mediator activity	8/1453	34/22548	0.235294	3.65135	4.06039	0.00117101	0.0294002	0.0264107	Jam3/Tmigd1/Cntn6/Nfasc/Lrrc4c/Epcam/Izumo1/Clstn3	8
GO:1990868	BP	GO:1990868	response to chemokine	18/1454	79/23040	0.227848	3.61047	6.03204	1.55746239708506e-06	0.000674771	0.000598393	Robo1/Mpl/Slc12a2/Slit2/Ppbp/Cxcl3/Gpr35/Ccrl2/Cxcl9/Ccl19/Ackr1/Ccl4/Cxcl13/Ccl11/Ccl12/Cxcl17/Padi2/Gpr75	18
GO:1990869	BP	GO:1990869	cellular response to chemokine	18/1454	79/23040	0.227848	3.61047	6.03204	1.55746239708506e-06	0.000674771	0.000598393	Robo1/Mpl/Slc12a2/Slit2/Ppbp/Cxcl3/Gpr35/Ccrl2/Cxcl9/Ccl19/Ackr1/Ccl4/Cxcl13/Ccl11/Ccl12/Cxcl17/Padi2/Gpr75	18
GO:0048821	BP	GO:0048821	erythrocyte development	12/1454	53/23040	0.226415	3.58776	4.89496	9.04506029618026e-05	0.0134358	0.011915	Alas2/Rhd/Hba-a1/Hba-a2/Adgrf4/Gata1/Rhag/Bpgm/Klf1/Hbb-b1/Slc4a1/Epb42	12
GO:0060603	BP	GO:0060603	mammary gland duct morphogenesis	9/1454	41/23040	0.219512	3.47838	4.12224	0.000861787	0.0469404	0.0416272	Wnt5a/Csmd1/Pthlh/Robo1/Esr1/Slc12a2/Slit2/Areg/Ccl11	9
GO:0010463	BP	GO:0010463	mesenchymal cell proliferation	12/1454	56/23040	0.214286	3.39556	4.65818	0.000158826	0.0183497	0.0162727	Wnt5a/Dchs2/Foxp2/Six1/Mycn/Msx1/Gas1/Ptn/Bmp2/Sox9/Fgf7/Wnt11	12
GO:0072132	BP	GO:0072132	mesenchyme morphogenesis	12/1454	56/23040	0.214286	3.39556	4.65818	0.000158826	0.0183497	0.0162727	Wnt5a/Robo1/Lef1/Msx1/Snai2/Smad3/Foxc2/Robo2/Bmp5/Bmp2/Sox9/Wnt11	12
GO:0010543	BP	GO:0010543	regulation of platelet activation	10/1454	47/23040	0.212766	3.37148	4.22375	0.000586614	0.0403363	0.0357706	Ceacam1/Emilin2/Pdgfra/Adamts18/Gp1bb/Ctsg/Alox12/Gp9/Gp1ba/C1qtnf1	10
GO:0005109	MF	GO:0005109	frizzled binding	9/1453	42/22548	0.214286	3.32534	3.95867	0.00120063	0.0294002	0.0264107	Wnt5a/Wnt9a/Bambi/Sfrp1/Wnt8b/Wnt10b/Ror2/Wnt6/Wnt11	9
GO:0008028	MF	GO:0008028	monocarboxylic acid transmembrane transporter activity	15/1453	71/22548	0.211268	3.2785	5.04657	3.79395508647709e-05	0.0027871	0.0025037	Slco1c1/Slco1b2/Slco1a6/Ceacam1/Ceacam2/Slc22a27/Slc51a/Slc6a12/Slc16a13/Slc16a5/Slc1a4/Slc32a1/Mfsd2a/Abcb11/Slc16a3	15
GO:1901618	MF	GO:1901618	organic hydroxy compound transmembrane transporter activity	11/1453	53/22548	0.207547	3.22077	4.24801	0.000473536	0.0173933	0.0156248	Slco1c1/Slco1b2/Slco1a6/Ceacam1/Ceacam2/Slc22a3/Slc51a/Aqp3/Slc5a11/Abcb11/Slc16a3	11
GO:0008009	MF	GO:0008009	chemokine activity	9/1453	45/22548	0.2	3.10365	3.7072	0.00200525	0.0438504	0.0393917	Ppbp/Cxcl3/Cxcl9/Ccl19/Ccl4/Cxcl13/Ccl11/Ccl12/Cxcl17	9
GO:0005581	CC	GO:0005581	collagen trimer	16/1470	81/22834	0.197531	3.06831	4.89146	5.00298984503272e-05	0.0032158	0.00284137	Col12a1/Col3a1/Col4a4/Emilin2/Lum/Col25a1/Col17a1/Colq/Col9a2/Col8a1/Col13a1/Col1a1/C1qtnf1/Fcna/Col16a1/C1qtnf7	16
GO:0070169	BP	GO:0070169	positive regulation of biomineral tissue development	11/1454	58/23040	0.189655	3.00526	3.96844	0.000887304	0.0470724	0.0417443	Adgrv1/Cftr/Cd276/Smad3/Wnt10b/Ptn/Nell1/Bmp2/Fam20c/Wnt6/Odaph	11
GO:0051963	BP	GO:0051963	regulation of synapse assembly	27/1454	144/23040	0.1875	2.97111	6.15802	3.08581498547838e-07	0.000267854	0.000237536	Wnt5a/Srpx2/Gpc4/St8sia2/Negr1/Lrrtm4/Six1/Robo1/Ephb3/Il1rapl1/Elavl2/Lzts1/Colq/Snca/Ephb1/Xlr3b/Epha7/Nlgn1/Lingo2/Slit2/Psd/Vstm5/Adgrb1/Ptprd/Clstn3/Adgrb3/Grin1	27
GO:0051932	BP	GO:0051932	synaptic transmission, GABAergic	13/1454	70/23040	0.185714	2.94282	4.22502	0.000386769	0.0324325	0.0287614	Gabre/Gabra3/Adra1a/Nalcn/Tacr1/Cntnap4/Car2/Nlgn1/Nps/Gabbr2/Phf24/Gabrd/Clstn3	13
GO:0051965	BP	GO:0051965	positive regulation of synapse assembly	15/1454	82/23040	0.182927	2.89865	4.47005	0.000169058	0.0191072	0.0169445	Srpx2/St8sia2/Lrrtm4/Ephb3/Il1rapl1/Ephb1/Xlr3b/Nlgn1/Lingo2/Slit2/Vstm5/Adgrb1/Ptprd/Clstn3/Adgrb3	15
GO:0008201	MF	GO:0008201	heparin binding	32/1453	175/22548	0.182857	2.83762	6.40472	7.66960226306784e-08	5.47007724815751e-05	4.91387484954354e-05	Eva1c/Ecm2/Lamc2/Tgfbr3/Fgf2/Alk/Col25a1/Col17a1/Pcolce2/Sfrp1/Colq/F2/Sost/Rspo1/Ctsg/Serpind1/Fgfr4/Slit2/Saa1/Fgfbp3/Ptn/Nell1/Defb34/Fn1/Col13a1/Prss34/Reg4/Pcsk6/Cxcl13/Pcolce/Fgf7/Fbln7	32
GO:0060076	CC	GO:0060076	excitatory synapse	18/1470	99/22834	0.181818	2.82424	4.77146	5.53387652310241e-05	0.0032158	0.00284137	Ntm/Srpx2/Syp/Elavl2/Pclo/Cntn6/Sptbn2/Nlgn1/Unc13a/Cacng3/Cadm3/Sema3a/Slc17a8/Adgrb3/Shank1/Shisa7/Slc16a3/Grin1	18
GO:1905330	BP	GO:1905330	regulation of morphogenesis of an epithelium	13/1454	73/23040	0.178082	2.82188	4.04629	0.000589643	0.0403363	0.0357706	Wnt5a/Fgf2/Sulf1/Six1/Pdgfra/Esr1/Sfrp1/Hgf/Snai2/Agt/Alox12/Sox9/Fgf7	13
GO:0061515	BP	GO:0061515	myeloid cell development	18/1454	102/23040	0.176471	2.79634	4.71889	6.43327693536649e-05	0.0111489	0.00988693	Alas2/Rhd/Hba-a1/Hba-a2/Adgrf4/Slc9b2/Gp1bb/Gata1/Rhag/Bpgm/Klf1/Gp9/Fam20c/Gp1ba/Hbb-b1/Evi2b/Slc4a1/Epb42	18
GO:0062014	BP	GO:0062014	negative regulation of small molecule metabolic process	21/1454	121/23040	0.173554	2.75012	5.00946	2.12657930006383e-05	0.0051813	0.00459483	Ceacam1/Ceacam2/Malrd1/Fbp1/Fmo4/Sik1/Snai2/Erfe/Ppargc1a/Atcay/Ddit4/Bmp5/Rd3/Bmp2/Sox9/Cda/Dkkl1/Slc4a1/Gck/Mfsd2a/Trib3	21
GO:0032729	BP	GO:0032729	positive regulation of type II interferon production	16/1454	93/23040	0.172043	2.72618	4.32906	0.000218583	0.0224441	0.0199036	Tlr9/Wnt5a/Cd160/Il12b/Klre1/Cd276/Havcr2/Klrk1/F2rl1/Tnfsf4/Ptpn22/Cd14/Il12a/Cd27/Cd244a/Slamf1	16
GO:0060997	BP	GO:0060997	dendritic spine morphogenesis	13/1454	76/23040	0.171053	2.71049	3.87643	0.000875787	0.0469404	0.0416272	Zdhhc15/Tiam1/Myo5b/Ephb3/Ppfia2/Ngef/Ephb1/Xlr3b/Reln/Nlgn1/Arhgap44/Camk2b/Shank1	13
GO:0005267	MF	GO:0005267	potassium channel activity	21/1453	122/22548	0.172131	2.67117	4.8575	3.28371931425093e-05	0.0027871	0.0025037	Kcnj8/Kcnh8/Abcc9/Kcne4/Kcnk10/Kcnip1/Kcnq5/Kcng2/Kcnn2/Kcne2/Kcnd3/Kcnu1/Kcnma1/Kcnk12/Kcna2/Hcn3/Kcnj16/Kcnmb2/Kcnmb3/Kcnn1/Kcnk2	21
GO:0022612	BP	GO:0022612	gland morphogenesis	26/1454	158/23040	0.164557	2.60756	5.26231	6.43032354943866e-06	0.00196654	0.00174395	Ceacam1/Ceacam2/Wnt5a/Rxfp1/Lama1/Csmd1/Sulf1/Pthlh/Robo1/Esr2/Esr1/Sfrp1/Hgf/Mmp2/Slc12a2/Tnfaip3/Snai2/Slit2/Areg/Ptn/Bcl2/Pax6/Sox9/Sema3a/Ccl11/Fgf7	26
GO:0098839	CC	GO:0098839	postsynaptic density membrane	19/1470	114/22834	0.166667	2.58889	4.46109	0.00011823	0.0056213	0.00496679	Tiam1/Oprd1/Lrrtm4/Il1rapl1/Neto2/Lzts1/Sorcs3/Mpp2/Ptpro/Epha7/Ptprt/Lrrc4c/Grin3a/Cacng3/Cacng5/Clstn3/Adgrb3/Slc16a3/Grin1	19
GO:0005249	MF	GO:0005249	voltage-gated potassium channel activity	16/1453	98/22548	0.163265	2.53359	3.99302	0.000508057	0.0179078	0.0160869	Kcnj8/Kcnh8/Kcne4/Kcnk10/Kcnq5/Kcng2/Kcnn2/Kcne2/Kcnd3/Kcnma1/Kcnk12/Kcna2/Hcn3/Kcnj16/Kcnn1/Kcnk2	16
GO:0050773	BP	GO:0050773	regulation of dendrite development	23/1454	144/23040	0.159722	2.53095	4.78289	3.50890151350123e-05	0.00675658	0.00599181	Zdhhc15/Tiam1/Vldlr/Wnt5a/Alk/Myo5b/Robo1/Dgkg/Il1rapl1/Csmd3/Fat3/Lzts1/Xlr3b/Reln/Ptn/Bmp5/Crp/Mgarp/Ptprd/Camk2b/Mfsd2a/Adgrb3/Grin1	23
GO:0099634	CC	GO:0099634	postsynaptic specialization membrane	25/1470	154/22834	0.162338	2.52165	4.96994	1.71562987832192e-05	0.00200632	0.00177272	Gabra3/Tiam1/Cdh10/Oprd1/Lrrtm4/Il1rapl1/Neto2/Lzts1/Sorcs3/Mpp2/Ptpro/Epha7/Nlgn1/Kcnd3/Ptprt/Lrrc4c/Grin3a/Cacng3/Cacng5/Chrne/Clstn3/Adgrb3/Shisa7/Slc16a3/Grin1	25
GO:1904427	BP	GO:1904427	positive regulation of calcium ion transmembrane transport	15/1454	95/23040	0.157895	2.50199	3.80726	0.000868005	0.0469404	0.0416272	Cd19/Trdn/Gimap3/Gpr39/F2/Snca/Ms4a1/Gstm7/Cxcl9/Bdkrb1/Gper1/Casq1/Gjc2/Il13/Grin1	15
GO:0000795	CC	GO:0000795	synaptonemal complex	13/1470	81/22834	0.160494	2.493	3.53088	0.0019189	0.0385994	0.0341052	Gm21865/Smc1b/Tex12/Sycp3/1700013H16Rik/Xlr3b/Xlr4c/4930447C04Rik/Dmc1/3830403N18Rik/Xlr5a/Fkbp6/Syce1	13
GO:0099086	CC	GO:0099086	synaptonemal structure	13/1470	81/22834	0.160494	2.493	3.53088	0.0019189	0.0385994	0.0341052	Gm21865/Smc1b/Tex12/Sycp3/1700013H16Rik/Xlr3b/Xlr4c/4930447C04Rik/Dmc1/3830403N18Rik/Xlr5a/Fkbp6/Syce1	13
GO:0015370	MF	GO:0015370	solute:sodium symporter activity	13/1453	81/22548	0.160494	2.49058	3.52706	0.00193498	0.0438504	0.0393917	Slc1a3/Slc22a3/Slc6a14/Slc12a2/Slc28a2/Slc28a1/Slc28a3/Slc4a9/Slc5a11/Slc6a12/Slc13a4/Slc17a8/Mfsd2a	13
GO:0022843	MF	GO:0022843	voltage-gated monoatomic cation channel activity	23/1453	144/22548	0.159722	2.47861	4.67153	4.83718467791375e-05	0.00329965	0.00296414	Kcnj8/Kcnh8/Cacna2d3/Kcne4/Kcnk10/Kcnq5/Kcng2/Kcnn2/Kcne2/Kcnd3/Cacng3/Kcnma1/Kcnk12/Kcna2/Cacng1/Cacng5/Hcn3/Kcnj16/Kcnn1/Tmc2/Kcnk2/Catsper4/Grin1	23
GO:0019226	BP	GO:0019226	transmission of nerve impulse	17/1454	109/23040	0.155963	2.47139	3.99628	0.000469463	0.036429	0.0323056	Jam3/Kcnj8/Nfasc/Atp1a3/Penk/Gpr35/Cacng3/Kcnma1/Kcna2/Agt/Atp1a2/Cacng5/Kcnmb2/Kcnmb3/P2rx3/Scn3a/Scn2a	17
GO:0005201	MF	GO:0005201	extracellular matrix structural constituent	23/1453	145/22548	0.158621	2.46151	4.63363	5.40421951006017e-05	0.00338678	0.00304241	Srpx2/Col12a1/Col3a1/Lamc2/Lama1/Col4a4/Emilin2/Lum/Col25a1/Col17a1/Pcolce2/Colq/Col9a2/Reln/Lamb3/Dpt/Slit2/Bmper/Col8a1/Fn1/Col13a1/Col1a1/Col16a1	23
GO:0045833	BP	GO:0045833	negative regulation of lipid metabolic process	18/1454	116/23040	0.155172	2.45885	4.08812	0.000345467	0.0315102	0.0279436	Ceacam1/Ceacam2/Gimap3/Alk/Esr1/Malrd1/Fmo4/Sik1/Snai2/Bmp5/Bmp2/Sox9/Gper1/Dkkl1/Sphk1/Apoc2/Mfsd2a/Trib3	18
GO:2000027	BP	GO:2000027	regulation of animal organ morphogenesis	17/1454	110/23040	0.154545	2.44892	3.95336	0.000523217	0.037471	0.0332297	Spag6l/Wnt5a/Fgf2/Sulf1/Six1/Robo1/Pkhd1/Sfrp1/Hgf/Msx1/Snai2/Fgfr4/Robo2/Agt/Bmp2/Sox9/Fgf7	17
GO:0015081	MF	GO:0015081	sodium ion transmembrane transporter activity	25/1453	160/22548	0.15625	2.42472	4.74647	3.3860740275942e-05	0.0027871	0.0025037	Slc1a3/Nalcn/Slc22a3/Scn3b/Slc8a3/Slc9b2/Slc6a14/Slc12a2/Slc28a2/Slc28a1/Slc28a3/Slc4a9/Atp1a3/Slc24a1/Asic1/Scnn1g/Slc5a11/Slc6a12/Atp1a2/Hcn3/Slc13a4/Slc17a8/Mfsd2a/Scn3a/Scn2a	25
GO:0015079	MF	GO:0015079	potassium ion transmembrane transporter activity	25/1453	161/22548	0.15528	2.40966	4.71105	3.76726421042556e-05	0.0027871	0.0025037	Kcnj8/Kcnh8/Abcc9/Kcne4/Kcnk10/Kcnip1/Kcnq5/Slc12a2/Kcng2/Kcnn2/Atp1a3/Kcne2/Kcnd3/Slc24a1/Kcnu1/Kcnma1/Kcnk12/Kcna2/Atp1a2/Hcn3/Kcnj16/Kcnmb2/Kcnmb3/Kcnn1/Kcnk2	25
GO:0007416	BP	GO:0007416	synapse assembly	35/1454	231/23040	0.151515	2.4009	5.55377	1.30435513154417e-06	0.000674771	0.000598393	Gabre/Gabra3/Kcnj8/Shank2/Wnt5a/Srpx2/Gpc4/St8sia2/Negr1/Lrrtm4/Six1/Robo1/Ephb3/Il1rapl1/Elavl2/Lzts1/Pclo/Colq/Sptbn2/Snca/Ephb1/Xlr3b/Epha7/Reln/Nlgn1/Lingo2/Slit2/Lgi2/Psd/Vstm5/Adgrb1/Ptprd/Clstn3/Adgrb3/Grin1	35
GO:0071772	BP	GO:0071772	response to BMP	27/1454	180/23040	0.15	2.37689	4.81311	2.45404125562842e-05	0.00531607	0.00471434	Fstl5/Wnt5a/Tgfbr3/Sulf1/Lef1/Adamts7/Bglap/Dlx1/Fst/Pdcd4/Bambi/Sfrp1/Msx1/Bmp8b/Sost/Foxd1/Kcnd3/Bmp10/Tmprss6/Bmper/Egr1/Hes1/Vwc2l/Ror2/Bmp5/Bmp2/Crb2	27
GO:0071773	BP	GO:0071773	cellular response to BMP stimulus	27/1454	180/23040	0.15	2.37689	4.81311	2.45404125562842e-05	0.00531607	0.00471434	Fstl5/Wnt5a/Tgfbr3/Sulf1/Lef1/Adamts7/Bglap/Dlx1/Fst/Pdcd4/Bambi/Sfrp1/Msx1/Bmp8b/Sost/Foxd1/Kcnd3/Bmp10/Tmprss6/Bmper/Egr1/Hes1/Vwc2l/Ror2/Bmp5/Bmp2/Crb2	27
GO:0006813	BP	GO:0006813	potassium ion transport	35/1454	239/23040	0.146444	2.32054	5.32599	2.89064498523736e-06	0.0010019	0.000888493	Atp1b4/Kcnj8/Slc1a3/Kcnh8/Abcc9/Kcne4/Kcnk10/Nalcn/Kcnip1/Gja5/Kcnq5/Slc12a2/Kcng2/Kcnn2/Atp1a3/Kcne2/Kcnd3/Slc24a1/Rgs4/Wnk3/Fxyd3/Kcnu1/Kcnma1/Kcnk12/Kcna2/Atp1a2/Rgs7/Hcn3/Kcnj16/Kcnmb2/Kcnmb3/Kcnn1/Nppa/Kcnk2/Gck	35
GO:0051208	BP	GO:0051208	sequestering of calcium ion	20/1454	137/23040	0.145985	2.31328	4.00127	0.000381568	0.0324325	0.0287614	Cd19/Trdn/Fgf2/Atp7b/Plch2/Gpr39/F2/Snca/Fasl/Gp1bb/Gstm7/Cxcl9/Bdkrb1/Ccl19/Glp1r/Gp9/Gp1ba/Gper1/Casq1/Il13	20
GO:0071805	BP	GO:0071805	potassium ion transmembrane transport	29/1454	199/23040	0.145729	2.30921	4.81399	2.18143359543606e-05	0.0051813	0.00459483	Kcnj8/Slc1a3/Kcnh8/Abcc9/Kcne4/Kcnk10/Nalcn/Kcnip1/Kcnq5/Slc12a2/Kcng2/Kcnn2/Atp1a3/Kcne2/Kcnd3/Slc24a1/Rgs4/Wnk3/Kcnu1/Kcnma1/Kcnk12/Kcna2/Atp1a2/Rgs7/Hcn3/Kcnj16/Kcnn1/Nppa/Kcnk2	29
GO:0001508	BP	GO:0001508	action potential	23/1454	158/23040	0.14557	2.30669	4.27741	0.000151104	0.0182695	0.0162016	Kcnj8/Abcc9/Kcne4/Adra1a/Tacr1/Scn3b/Kcnip1/Dsp/Gna14/Gja5/Kcnn2/Kcne2/Gpr35/Nps/Kcnma1/Kcna2/Atp1a2/Slc4a3/Kcnmb2/Kcnmb3/P2rx3/Scn3a/Scn2a	23
GO:0022832	MF	GO:0022832	voltage-gated channel activity	26/1453	175/22548	0.148571	2.30557	4.55034	5.75132502540991e-05	0.00338678	0.00304241	Kcnj8/Kcnh8/Cacna2d3/Kcne4/Kcnk10/Tmem266/Kcnq5/Kcng2/Kcnn2/Kcne2/Kcnd3/Grin3a/Cacng3/Kcnma1/Kcnk12/Kcna2/Cacng1/Cacng5/Hcn3/Kcnj16/Kcnn1/Tmc2/Kcnk2/Scn2a/Catsper4/Grin1	26
GO:1901890	BP	GO:1901890	positive regulation of cell junction assembly	19/1454	131/23040	0.145038	2.29827	3.86745	0.000573277	0.0402766	0.0357177	Srpx2/St8sia2/Lrrtm4/Ace2/Ephb3/Il1rapl1/Ephb1/Xlr3b/Nlgn1/Smad3/Lingo2/Slit2/Agt/Vstm5/Adgrb1/Ptprd/Clstn3/Col16a1/Adgrb3	19
GO:0035725	BP	GO:0035725	sodium ion transmembrane transport	22/1454	152/23040	0.144737	2.29349	4.1525	0.000226376	0.0224441	0.0199036	Nalcn/Scn3b/Cftr/Slc8a3/Slc6a14/Slc12a2/Slc28a3/Slc4a9/Atp1a3/Slc24a1/Asic1/Wnk3/Fxyd3/Scnn1g/Slc6a12/Atp1a2/Slc6a19/Hcn3/Pcsk9/Nppa/Scn3a/Scn2a	22
GO:0051209	BP	GO:0051209	release of sequestered calcium ion into cytosol	19/1454	132/23040	0.143939	2.28086	3.8302	0.000630826	0.0409958	0.0363555	Cd19/Trdn/Fgf2/Plch2/Gpr39/F2/Snca/Fasl/Gp1bb/Gstm7/Cxcl9/Bdkrb1/Ccl19/Glp1r/Gp9/Gp1ba/Gper1/Casq1/Il13	19
GO:0008037	BP	GO:0008037	cell recognition	23/1454	160/23040	0.14375	2.27785	4.2096	0.000182835	0.0202247	0.0179355	Megf10/Wnt5a/Clgn/Adam2/Zpbp2/Robo1/Ephb3/Havcr2/Cntn6/Adam18/Tnn/Adam3/Adam5/Ephb1/L1cam/Robo2/Ccl19/Tulp1/Clec2i/Adgrb1/Sema3a/Izumo1/Ndn	23
GO:0030509	BP	GO:0030509	BMP signaling pathway	24/1454	168/23040	0.142857	2.26371	4.26655	0.000147553	0.018265	0.0161976	Fstl5/Wnt5a/Tgfbr3/Sulf1/Lef1/Dlx1/Fst/Pdcd4/Bambi/Sfrp1/Msx1/Bmp8b/Sost/Foxd1/Bmp10/Tmprss6/Bmper/Egr1/Hes1/Vwc2l/Ror2/Bmp5/Bmp2/Crb2	24
GO:0051283	BP	GO:0051283	negative regulation of sequestering of calcium ion	19/1454	133/23040	0.142857	2.26371	3.79329	0.000693287	0.0434265	0.038511	Cd19/Trdn/Fgf2/Plch2/Gpr39/F2/Snca/Fasl/Gp1bb/Gstm7/Cxcl9/Bdkrb1/Ccl19/Glp1r/Gp9/Gp1ba/Gper1/Casq1/Il13	19
GO:0050807	BP	GO:0050807	regulation of synapse organization	44/1454	309/23040	0.142395	2.25638	5.77057	3.60642546795701e-07	0.000267854	0.000237536	Zdhhc15/Tiam1/Shank2/Wnt5a/Srpx2/Gpc4/St8sia2/Negr1/Lrrtm4/Six1/Myo5b/Robo1/Cntnap4/Ephb3/Ppfia2/Il1rapl1/Elavl2/Lzts1/Frmpd4/Colq/Ngef/Snca/Ephb1/Ptpro/Xlr3b/Epha7/Reln/Nlgn1/Lingo2/Slit2/Ptprt/Ptn/Psd/Ror2/Vstm5/Adgrb1/Il10ra/Arhgap44/Ptprd/Clstn3/Camk2b/Adgrb3/Klk8/Grin1	44
GO:0044309	CC	GO:0044309	neuron spine	31/1470	214/22834	0.14486	2.25016	4.81974	1.91808962412188e-05	0.00200632	0.00177272	Tiam1/Shisa8/Shank2/Slc1a3/Oprd1/Syp/Nrgn/Myo5b/Ppfia2/Tenm2/Lzts1/Slc8a3/Frmpd4/Kcnn2/Mpp2/Ptpro/Atp1a3/Nlgn1/Kcnd3/Asic1/Psd/Atp1a2/Gper1/Lpar1/Grip2/Arhgap44/P2rx3/Myl7/Shank1/Shisa7/Grin1	31
GO:0050803	BP	GO:0050803	regulation of synapse structure or activity	45/1454	317/23040	0.141956	2.24942	5.81346	2.9146600589128e-07	0.000267854	0.000237536	Zdhhc15/Tiam1/Shank2/Wnt5a/Srpx2/Gpc4/St8sia2/Negr1/Lrrtm4/Six1/Myo5b/Robo1/Cntnap4/Ephb3/Ppfia2/Il1rapl1/Elavl2/Lzts1/Frmpd4/Colq/Ngef/Snca/Ephb1/Ptpro/Xlr3b/Epha7/Reln/Nlgn1/Lingo2/Slit2/Ptprt/Ptn/Psd/Ror2/Vstm5/Adgrb1/Il10ra/Arhgap44/Ptprd/Slc17a8/Clstn3/Camk2b/Adgrb3/Klk8/Grin1	45
GO:0032609	BP	GO:0032609	type II interferon production	21/1454	148/23040	0.141892	2.24841	3.95434	0.000408864	0.0335508	0.0297532	Tlr9/Wnt5a/Foxp3/Gimap3/Cd160/Il12b/Klre1/Itk/Cd276/Havcr2/Klrk1/F2rl1/Tnfsf4/Ptpn22/Cd14/Avpr2/Il12a/Cd27/Cd244a/Spn/Slamf1	21
GO:0005244	MF	GO:0005244	voltage-gated monoatomic ion channel activity	25/1453	173/22548	0.144509	2.24252	4.30559	0.000124653	0.00595217	0.00534695	Kcnj8/Kcnh8/Cacna2d3/Kcne4/Kcnk10/Kcnq5/Kcng2/Kcnn2/Kcne2/Kcnd3/Grin3a/Cacng3/Kcnma1/Kcnk12/Kcna2/Cacng1/Cacng5/Hcn3/Kcnj16/Kcnn1/Tmc2/Kcnk2/Scn2a/Catsper4/Grin1	25
GO:0098742	BP	GO:0098742	cell-cell adhesion via plasma-membrane adhesion molecules	30/1454	212/23040	0.141509	2.24235	4.71635	2.81617996780097e-05	0.00585653	0.00519363	Cdh19/Ceacam1/Ceacam2/Pcdh19/Cdh4/Cdh10/Cdh12/Gpc4/Robo1/Pcdh10/Tenm2/Il1rapl1/Fat3/Cntn6/Dab1/Tnfaip3/Unc5d/Nlgn1/Cdh11/L1cam/Ptprt/Itga4/Lrrc4c/Robo2/Epcam/Cadm3/Bmp2/Crb2/Ptprd/Clstn3	30
GO:0098802	CC	GO:0098802	plasma membrane signaling receptor complex	28/1470	194/22834	0.14433	2.24192	4.55677	5.07950969712223e-05	0.0032158	0.00284137	Shisa8/Ceacam1/Ceacam2/Ighd/Lrrtm4/Chrng/Gp1bb/Itga4/Gabbr2/Grin3a/Vwc2l/Cacng3/Cacng5/Trat1/Bmp2/Gp9/Chrne/Gp1ba/Cd3d/Acvr1c/Itgb6/Cd79b/Traf4/Zap70/Itga2b/Cd79a/Itgad/Grin1	28
GO:0051282	BP	GO:0051282	regulation of sequestering of calcium ion	19/1454	135/23040	0.140741	2.23017	3.72044	0.000834317	0.046509	0.0412447	Cd19/Trdn/Fgf2/Plch2/Gpr39/F2/Snca/Fasl/Gp1bb/Gstm7/Cxcl9/Bdkrb1/Ccl19/Glp1r/Gp9/Gp1ba/Gper1/Casq1/Il13	19
GO:0099094	MF	GO:0099094	ligand-gated monoatomic cation channel activity	17/1453	121/22548	0.140496	2.18025	3.41639	0.00194494	0.0438504	0.0393917	Kcnj8/Cnga1/Chrng/Kcnn2/Cngb1/Kcne2/Asic1/Scnn1g/Kcnma1/Chrne/Kcnj16/Kcnmb2/Kcnmb3/Kcnn1/P2rx3/Catsper4/Grin1	17
GO:0050671	BP	GO:0050671	positive regulation of lymphocyte proliferation	24/1454	175/23040	0.137143	2.17316	4.04313	0.000276713	0.0266414	0.0236258	Tlr9/Ighd/Foxp3/Tacr1/Il12b/Slc7a1/Cd276/Havcr2/Mpl/Tnfsf4/Ptpn22/Hes1/Il12a/Bcl2/Ccl19/Btnl2/Cd244a/Spn/Flt3l/Zap70/Cd55/Slc4a1/Il13/Slamf1	24
GO:0015293	MF	GO:0015293	symporter activity	21/1453	150/22548	0.14	2.17255	3.78147	0.00064305	0.0179078	0.0160869	Slc1a3/Slc17a1/Slc22a3/Slc6a14/Slc12a2/Slc28a2/Slc28a1/Slc28a3/Slc4a9/Slc24a1/Slc5a11/Slc6a12/Slc16a13/Slc6a19/Slc45a3/Slc16a5/Slc1a4/Slc13a4/Slc17a8/Mfsd2a/Slc16a3	21
GO:0005342	MF	GO:0005342	organic acid transmembrane transporter activity	27/1453	193/22548	0.139896	2.17095	4.28761	0.000119296	0.00595217	0.00534695	Slco1c1/Slco1b2/Slc25a21/Slco1a6/Slc1a3/Ceacam1/Ceacam2/Slc22a27/Slc25a29/Slc7a1/Slc6a14/Slc51a/Slc26a3/Grin3a/Slc6a12/Slc16a13/Slc6a19/Slc29a4/Slc16a5/Slc1a4/Slc32a1/Slc17a8/Mfsd2a/Abcb11/AU018091/Slc16a3/Grin1	27
GO:0005125	MF	GO:0005125	cytokine activity	33/1453	236/22548	0.139831	2.16992	4.74167	2.24334934457997e-05	0.0027871	0.0025037	Wnt5a/Wnt9a/Fgf2/Inhbb/Cntf/Il17f/Il12b/Bmp8b/Tnfsf4/Fasl/Wnt8b/Bmp10/Ppbp/Cxcl3/Areg/Wnt10b/Cxcl9/Il12a/Ccl19/Bmp5/Inha/Bmp2/Ccl4/Wnt6/Flt3l/Cxcl13/Il13/Ccl11/Ccl12/Cxcl17/Ctf1/Ctf2/Wnt11	33
GO:0007613	BP	GO:0007613	memory	23/1454	168/23040	0.136905	2.16938	3.9481	0.000376506	0.0324325	0.0287614	Camk4/Shank2/Brinp1/Tafa2/Csmd1/Tacr1/Sorcs3/Slc8a3/Atp1a3/Reln/Egr1/Ptn/Lmx1a/Asic1/Glp1r/B4galt2/Chst10/Scn2a/Pak6/Shank1/Shisa7/Klk8/Grin1	23
GO:0043197	CC	GO:0043197	dendritic spine	29/1470	208/22834	0.139423	2.16571	4.43012	7.12374001317324e-05	0.00372572	0.00329192	Tiam1/Shisa8/Shank2/Slc1a3/Oprd1/Nrgn/Myo5b/Ppfia2/Tenm2/Lzts1/Slc8a3/Frmpd4/Kcnn2/Mpp2/Ptpro/Atp1a3/Nlgn1/Kcnd3/Asic1/Psd/Atp1a2/Gper1/Lpar1/Arhgap44/P2rx3/Myl7/Shank1/Shisa7/Grin1	29
GO:1903169	BP	GO:1903169	regulation of calcium ion transmembrane transport	25/1454	183/23040	0.136612	2.16475	4.10559	0.00022182	0.0224441	0.0199036	Tlr9/Cd19/Trdn/Sln/Gimap3/Gpr39/F2/Snca/Ms4a1/Ptpn22/Sestd1/Gstm7/Gpr35/Cxcl9/Bdkrb1/Bcl2/Atp1a2/Cacng1/Gper1/Casq1/Gjc2/Nppa/Tmc2/Il13/Grin1	25
GO:0045211	CC	GO:0045211	postsynaptic membrane	49/1470	353/22834	0.13881	2.15619	5.74256	3.17610766726902e-07	0.00016611	0.00014677	Gabre/Gabra3/Tiam1/Shisa8/Shank2/Kctd8/Kctd16/Cdh10/Oprd1/Adra1a/Lrrtm4/Nrgn/Tenm2/Il1rapl1/Neto2/Lzts1/Sorcs3/Slc8a3/Chrng/Zc4h2/Kcnn2/Mpp2/Ptpro/Epha7/Nlgn1/Kcnd3/Prr7/Ptprt/Lrrc4c/Gabbr2/Grin3a/Cacng3/Kcnma1/Kcna2/Cacng5/Rgs7/Col13a1/Chrne/Adgrb1/Gper1/Lpar1/Grip2/Gabrd/Clstn3/Adgrb3/Shank1/Shisa7/Slc16a3/Grin1	49
GO:0007612	BP	GO:0007612	learning	26/1454	192/23040	0.135417	2.1458	4.13776	0.00019355	0.0209639	0.018591	Shank2/Adam2/Tafa2/Csmd1/Tacr1/Foxp2/Sorcs3/Adra1b/Slc8a3/Atp1a3/Reln/Ptn/Nps/Asic1/Agt/Atp1a2/Glp1r/B4galt2/Chst10/Htr6/Clstn3/Adgrb3/Pak6/Shank1/Grin1/Oprl1	26
GO:0120254	BP	GO:0120254	olefinic compound metabolic process	23/1454	170/23040	0.135294	2.14386	3.88502	0.000446757	0.0351923	0.0312089	Lrat/Dhrs9/Cyp11a1/Bglap/Cyp2j8/Cyp2j9/Adh7/Adh1/Ppargc1a/Egr1/Gstm7/Bco1/Kcnma1/Bmp5/Alox12/Plb1/Bmp2/Cyp2t4/Cyp2e1/Dkkl1/Sphk1/Alox8/Grin1	23
GO:0005539	MF	GO:0005539	glycosaminoglycan binding	33/1453	239/22548	0.138075	2.14269	4.66094	2.90973123956113e-05	0.0027871	0.0025037	Eva1c/Ecm2/Lamc2/Tgfbr3/Fgf2/Sulf1/Alk/Col25a1/Col17a1/Pcolce2/Sfrp1/Colq/F2/Sost/Rspo1/Ctsg/Serpind1/Fgfr4/Slit2/Saa1/Fgfbp3/Ptn/Nell1/Defb34/Fn1/Col13a1/Prss34/Reg4/Pcsk6/Cxcl13/Pcolce/Fgf7/Fbln7	33
GO:0032946	BP	GO:0032946	positive regulation of mononuclear cell proliferation	24/1454	178/23040	0.134831	2.13653	3.95059	0.000357404	0.0315816	0.0280069	Tlr9/Ighd/Foxp3/Tacr1/Il12b/Slc7a1/Cd276/Havcr2/Mpl/Tnfsf4/Ptpn22/Hes1/Il12a/Bcl2/Ccl19/Btnl2/Cd244a/Spn/Flt3l/Zap70/Cd55/Slc4a1/Il13/Slamf1	24
GO:0070588	BP	GO:0070588	calcium ion transmembrane transport	45/1454	334/23040	0.134731	2.13493	5.42252	1.27623594532877e-06	0.000674771	0.000598393	Tlr9/Kcnj8/Cd19/Cacna2d3/Trdn/Trpm1/Sln/Gimap3/Adra1a/Nalcn/Fgf2/Plch2/Trpm6/Gpr39/Slc8a3/F2/Snca/Fasl/Ms4a1/Ptpn22/Gp1bb/Slc24a1/Sestd1/Gstm7/Gpr35/Cxcl9/Asic1/Bdkrb1/Bcl2/Cacng3/Ccl19/Atp1a2/Cacng1/Glp1r/Gp9/Gp1ba/Gper1/Casq1/Gjc2/Nppa/Tmc2/P2rx3/Il13/Catsper4/Grin1	45
GO:0005261	MF	GO:0005261	monoatomic cation channel activity	44/1453	320/22548	0.1375	2.13376	5.36084	1.65731084561728e-06	0.000395683	0.00035545	Kcnj8/Kcnh8/Abcc9/Cacna2d3/Trpm1/Kcne4/Cnga1/Kcnk10/Pkd1l3/Nalcn/Scn3b/Kcnip1/Trpm6/Kcnq5/Chrng/Kcng2/Kcnn2/Cngb1/Kcne2/Kcnd3/Slc24a1/Asic1/Grin3a/Kcnu1/Scnn1g/Cacng3/Kcnma1/Kcnk12/Kcna2/Cacng1/Cacng5/Hcn3/Chrne/Kcnj16/Kcnmb2/Kcnmb3/Kcnn1/Tmc2/Kcnk2/P2rx3/Scn3a/Scn2a/Catsper4/Grin1	44
GO:0015276	MF	GO:0015276	ligand-gated monoatomic ion channel activity	22/1453	160/22548	0.1375	2.13376	3.77711	0.00062121	0.0179078	0.0160869	Gabre/Gabra3/Kcnj8/Cnga1/Cftr/Chrng/Kcnn2/Cngb1/Kcne2/Asic1/Grin3a/Scnn1g/Kcnma1/Chrne/Kcnj16/Kcnmb2/Kcnmb3/Kcnn1/Gabrd/P2rx3/Catsper4/Grin1	22
GO:0097553	BP	GO:0097553	calcium ion transmembrane import into cytosol	26/1454	194/23040	0.134021	2.12368	4.07913	0.000228801	0.0224441	0.0199036	Cd19/Trdn/Trpm1/Gimap3/Adra1a/Fgf2/Plch2/Gpr39/Slc8a3/F2/Snca/Fasl/Ms4a1/Gp1bb/Gstm7/Cxcl9/Bdkrb1/Bcl2/Ccl19/Glp1r/Gp9/Gp1ba/Gper1/Casq1/Il13/Grin1	26
GO:1901681	MF	GO:1901681	sulfur compound binding	40/1453	293/22548	0.136519	2.11853	5.05773	5.77301924420336e-06	0.00110265	0.000990529	Eva1c/Pnpla3/Sult2a2/Ecm2/Lamc2/Tgfbr3/Fgf2/Lrrtm4/Alk/Col25a1/Col17a1/Pcolce2/Fst/Sfrp1/Colq/F2/Sost/Rspo1/Atp1a3/Ctsg/Serpind1/Fgfr4/Slit2/Saa1/Fgfbp3/Gstm7/Hnf4a/Ptn/Nell1/Defb34/N6amt1/Fn1/Col13a1/Prss34/Reg4/Pcsk6/Cxcl13/Pcolce/Fgf7/Fbln7	40
GO:0006814	BP	GO:0006814	sodium ion transport	33/1454	247/23040	0.133603	2.11707	4.58095	3.77588051438416e-05	0.00676924	0.00600303	Atp1b4/Slc17a1/Nkain1/Nalcn/Scn3b/Cftr/Slc8a3/Slc9b2/Slc9b1/Slc6a14/Slc12a2/Slc28a3/Slc4a9/Sik1/Atp1a3/Slc24a1/Asic1/Wnk3/Fxyd3/Scnn1g/Slc5a11/Slc6a12/Atp1a2/Slc6a19/Maged2/Hcn3/Pcsk9/Nppa/Slc17a8/Nkain3/Scn3a/Scn2a/Catsper4	33
GO:1901888	BP	GO:1901888	regulation of cell junction assembly	33/1454	247/23040	0.133603	2.11707	4.58095	3.77588051438416e-05	0.00676924	0.00600303	Wnt5a/Srpx2/Gpc4/St8sia2/Negr1/Lrrtm4/Six1/Robo1/Ace2/Ephb3/Il1rapl1/Elavl2/Lzts1/Colq/Snca/Ephb1/Snai2/Xlr3b/Epha7/Nlgn1/Smad3/Lingo2/Slit2/Psd/Camsap3/Agt/Vstm5/Adgrb1/Ptprd/Clstn3/Col16a1/Adgrb3/Grin1	33
GO:0042391	BP	GO:0042391	regulation of membrane potential	66/1454	495/23040	0.133333	2.11279	6.4956	6.94407175233422e-09	3.61022290403856e-05	3.20158255528672e-05	Gabre/Gabra3/Kcnj8/Kcnh8/Abcc9/Trdn/Kcne4/Cnga1/Kcnk10/Oprd1/Gimap3/Adra1a/Nalcn/Tacr1/Gabrr3/Tafa4/Scn3b/Kcnip1/Dsp/Cntf/Gna14/Gja5/Gpr39/Cftr/Slc8a3/Pclo/Chrng/Slc26a3/Snca/Kcnn2/Cngb1/Mpp2/Atp1a3/Reln/Kcne2/Nlgn1/Kcnd3/Gpr35/Ptn/Nps/Rgs4/Asic1/Bcl2/Kcnma1/Kcnk12/Kcna2/Agt/Atp1a2/Alox12/Rgs7/Hcn3/Slc4a3/Chrne/Kcnmb2/Kcnmb3/Grip2/Xirp1/Nppa/Gabrd/Kcnk2/P2rx3/Scn3a/Scn2a/Insyn2b/Shank1/Grin1	66
GO:0050921	BP	GO:0050921	positive regulation of chemotaxis	22/1454	165/23040	0.133333	2.11279	3.72309	0.00071841	0.0436603	0.0387184	Tiam1/Wnt5a/Fgf2/Pdgfra/F2rl1/Snai2/Smad3/Slit2/Ppbp/Ptn/Ccr4/Il12a/Fn1/Ccl19/Lpar1/S100a14/Zfp580/Trem1/Cxcl13/Cxcl17/Defb25/Slamf1	22
GO:0034702	CC	GO:0034702	monoatomic ion channel complex	45/1470	331/22834	0.135952	2.11178	5.34457	1.69242158758474e-06	0.000442568	0.000391038	Gabra3/Shisa8/Kcnj8/Kcnh8/Abcc9/Cacna2d3/Trdn/Kcne4/Cnga1/Pkd1l3/Nalcn/Lrrtm4/Scn3b/Kcnip1/Cftr/Kcnq5/Chrng/Kcng2/Cngb1/Kcne2/Kcnd3/Sestd1/Grin3a/Kcnu1/Vwc2l/Scnn1g/Cacng3/Kcnma1/Clic3/Kcna2/Cacng1/Cacng5/Hcn3/Chrne/Kcnj16/Kcnmb2/Kcnmb3/Gabrd/Ttyh1/Kcnk2/Slc17a8/Scn3a/Scn2a/Catsper4/Grin1	45
GO:0046943	MF	GO:0046943	carboxylic acid transmembrane transporter activity	26/1453	192/22548	0.135417	2.10143	4.02251	0.000267642	0.011113	0.00998298	Slco1c1/Slco1b2/Slc25a21/Slco1a6/Slc1a3/Ceacam1/Ceacam2/Slc22a27/Slc25a29/Slc7a1/Slc6a14/Slc51a/Slc26a3/Grin3a/Slc6a12/Slc16a13/Slc6a19/Slc16a5/Slc1a4/Slc32a1/Slc17a8/Mfsd2a/Abcb11/AU018091/Slc16a3/Grin1	26
GO:0010565	BP	GO:0010565	regulation of cellular ketone metabolic process	23/1454	174/23040	0.132184	2.09458	3.76144	0.000622315	0.0409546	0.036319	Ceacam1/Ceacam2/Bglap/Malrd1/Snca/Fmo4/Fgfr4/Erfe/Ppargc1a/Egr1/Hnf4a/Atcay/Kcnma1/Agt/Bmp5/Bmp2/Sox9/Slc45a3/Dkkl1/Apoc2/Mfsd2a/Trib3/Abcb11	23
GO:0022836	MF	GO:0022836	gated channel activity	40/1453	298/22548	0.134228	2.08298	4.93916	8.71243494400453e-06	0.00138673	0.00124573	Gabre/Gabra3/Kcnj8/Kcnh8/Cacna2d3/Kcne4/Cnga1/Kcnk10/Tmem266/Cftr/Kcnq5/Chrng/Kcng2/Kcnn2/Cngb1/Kcne2/Kcnd3/Asic1/Grin3a/Scnn1g/Cacng3/Kcnma1/Kcnk12/Kcna2/Cacng1/Cacng5/Hcn3/Chrne/Kcnj16/Kcnmb2/Kcnmb3/Kcnn1/Gabrd/Tmc2/Kcnk2/P2rx3/Scn2a/Catsper4/Tmem150c/Grin1	40
GO:0022834	MF	GO:0022834	ligand-gated channel activity	22/1453	164/22548	0.134146	2.08171	3.64883	0.000869547	0.0224437	0.0201616	Gabre/Gabra3/Kcnj8/Cnga1/Cftr/Chrng/Kcnn2/Cngb1/Kcne2/Asic1/Grin3a/Scnn1g/Kcnma1/Chrne/Kcnj16/Kcnmb2/Kcnmb3/Kcnn1/Gabrd/P2rx3/Catsper4/Grin1	22
GO:0061138	BP	GO:0061138	morphogenesis of a branching epithelium	30/1454	229/23040	0.131004	2.07589	4.24659	0.00011936	0.0151354	0.0134223	Hhip/Wnt5a/Lama1/Fgf2/Csmd1/Sulf1/Six1/Pdgfra/Angpt1/Lef1/Pkhd1/Esr1/Sfrp1/Hgf/Mycn/Slc12a2/Foxd1/Snai2/Slit2/Areg/Grhl2/Bcl2/Foxc2/Agt/Bmp2/Sox9/Sema3a/Wnt6/Ccl11/Fgf7	30
GO:0060326	BP	GO:0060326	cell chemotaxis	43/1454	329/23040	0.130699	2.07105	5.07829	4.81588928508169e-06	0.00156486	0.00138774	Tiam1/Jam3/Defb47/Wnt5a/Fgf2/Agr2/Arhgef16/Tafa4/Pdgfra/Lef1/Hgf/Mmp2/Slc12a2/F2rl1/Stap1/Ephb1/Ptpro/Snai2/Ctsg/Slit2/Ppbp/Cxcl3/Gpr35/Ccrl2/Cxcl9/Ptn/Nr4a1/Ccr4/Il12a/Dpep1/Ccl19/Lpar1/S100a14/Ccl4/Zfp580/Trem1/Cxcl13/Ccl11/Ccl12/Cxcl17/Padi2/Defb25/Slamf1	43
GO:0046873	MF	GO:0046873	metal ion transmembrane transporter activity	58/1453	435/22548	0.133333	2.0691	5.90916	1.14556591584451e-07	5.47007724815751e-05	4.91387484954354e-05	Kcnj8/Slc1a3/Kcnh8/Abcc9/Cacna2d3/Trpm1/Kcne4/Kcnk10/Pkd1l3/Nalcn/Atp7b/Slc22a3/Scn3b/Kcnip1/Trpm6/Slc8a3/Slc9b2/Kcnq5/Atp13a4/Slc6a14/Slc12a2/Slc28a2/Slc28a1/Slc28a3/Kcng2/Kcnn2/Slc4a9/Atp1a3/Kcne2/Kcnd3/Slc24a1/Asic1/Grin3a/Kcnu1/Scnn1g/Cacng3/Slc5a11/Kcnma1/Slc6a12/Kcnk12/Kcna2/Atp1a2/Cacng1/Cacng5/Hcn3/Kcnj16/Kcnmb2/Kcnmb3/Kcnn1/Slc13a4/Tmc2/Kcnk2/Slc17a8/Mfsd2a/Scn3a/Scn2a/Catsper4/Grin1	58
GO:0007411	BP	GO:0007411	axon guidance	33/1454	255/23040	0.129412	2.05065	4.37857	7.13189179762575e-05	0.011493	0.0101921	Wnt5a/Fzd3/Lamc2/Cdh4/Lama1/Arhgef25/Kif5a/Robo1/Ephb3/Tenm2/Cyfip2/Cntn6/Gas1/Epha10/Unc5c/Ephb1/Unc5d/Ptpro/Foxd1/Nfasc/Epha7/Reln/Lamb3/Slit2/L1cam/Lmx1a/Robo2/Pax6/Sema3a/Ephb6/Kif5c/Draxin/Chn1	33
GO:0097485	BP	GO:0097485	neuron projection guidance	33/1454	256/23040	0.128906	2.04264	4.35379	7.7016347726663e-05	0.0117767	0.0104437	Wnt5a/Fzd3/Lamc2/Cdh4/Lama1/Arhgef25/Kif5a/Robo1/Ephb3/Tenm2/Cyfip2/Cntn6/Gas1/Epha10/Unc5c/Ephb1/Unc5d/Ptpro/Foxd1/Nfasc/Epha7/Reln/Lamb3/Slit2/L1cam/Lmx1a/Robo2/Pax6/Sema3a/Ephb6/Kif5c/Draxin/Chn1	33
GO:0001763	BP	GO:0001763	morphogenesis of a branching structure	32/1454	249/23040	0.128514	2.03643	4.26761	0.000104016	0.0146157	0.0129614	Hhip/Wnt5a/Lama1/Fgf2/Csmd1/Sulf1/Six1/Pdgfra/Angpt1/Lef1/Pkhd1/Esr1/Sfrp1/Hgf/Mycn/Slc12a2/Foxd1/Snai2/Epha7/Slit2/Areg/Grhl2/Bcl2/Foxc2/Agt/Col13a1/Bmp2/Sox9/Sema3a/Wnt6/Ccl11/Fgf7	32
GO:0034703	CC	GO:0034703	cation channel complex	26/1470	199/22834	0.130653	2.02948	3.82607	0.000463556	0.0134689	0.0119007	Kcnj8/Abcc9/Cacna2d3/Trdn/Kcne4/Cnga1/Pkd1l3/Scn3b/Kcnip1/Kcnq5/Kcng2/Cngb1/Kcne2/Kcnd3/Sestd1/Scnn1g/Kcnma1/Kcna2/Cacng1/Hcn3/Kcnmb2/Kcnmb3/Kcnk2/Scn3a/Scn2a/Catsper4	26
GO:0034329	BP	GO:0034329	cell junction assembly	62/1454	486/23040	0.127572	2.0215	5.90707	1.01490929204764e-07	0.000263826	0.000233963	Gabre/Gabra3/Jam3/Kcnj8/Shank2/Cdh19/Wnt5a/Srpx2/Cdh4/Cdh10/Cdh12/Epb41l3/Gpc4/St8sia2/Negr1/Lrrtm4/Six1/Robo1/Ace2/Ephb3/Gja5/Il1rapl1/Elavl2/Col17a1/Lzts1/Pclo/Mpp7/Colq/Cldn34c1/Sptbn2/Snca/Ephb1/Ptpro/Nfasc/Snai2/Xlr3b/Epha7/Reln/Nlgn1/Smad3/Cdh11/Lingo2/Slit2/Lgi2/Gjb2/Grhl2/Cldn11/Psd/Camsap3/Bcl2/Fn1/Agt/Vstm5/Cgn/Adgrb1/Ptprd/Nphs1/Clstn3/Col16a1/Adgrb3/Wnt11/Grin1	62
GO:0006816	BP	GO:0006816	calcium ion transport	57/1454	447/23040	0.127517	2.02062	5.65536	3.34908685390818e-07	0.000267854	0.000237536	Tlr9/Kcnj8/Homer2/Cd19/Cacna2d3/Trdn/Trpm1/Oprd1/Sln/Pkd1l3/Gimap3/Adra1a/Nalcn/Fgf2/Plch2/Trpm6/Gpr39/Slc8a3/F2/Snca/Fasl/Ms4a1/Ptpn22/Gp1bb/Slc24a1/Sestd1/Gstm7/Gpr35/Hes1/Cxcl9/Rgs4/Asic1/Wnk3/Grin3a/Bspry/Bdkrb1/Bcl2/Cacng3/Ccl19/Agt/Atp1a2/Cacng1/Cacng5/Glp1r/Gp9/Gp1ba/Gper1/Casq1/Gjc2/Nppa/Tmc2/P2rx3/Il13/Gck/Camk2b/Catsper4/Grin1	57
GO:0042734	CC	GO:0042734	presynaptic membrane	31/1470	239/22834	0.129707	2.01478	4.13681	0.000159221	0.00640557	0.00565974	Gabra3/Fosl1/Kcnj8/Kctd16/Cdh10/Oprd1/Adra1a/Gpc4/Syp/Stx19/Cntnap4/Ppfia2/Kcnq5/Cntn6/Dnajc6/Atp1a3/L1cam/Unc13a/Gabbr2/Otof/Kcnma1/Kcna2/Cadm3/Gper1/Lpar1/Ptprd/P2rx3/Cyth1/Scn2a/Dnm1/Grin1	31
GO:0045216	BP	GO:0045216	cell-cell junction organization	29/1454	230/23040	0.126087	1.99797	3.94771	0.000297222	0.0277844	0.0246395	Jam3/Cdh19/Ceacam1/Cdh4/Cdh10/Cdh12/Epb41l3/Tmigd1/Dsp/Ace2/Gja5/Pkhd1/Mpp7/F2rl1/Cldn34c1/Ptpro/Nfasc/Snai2/Smad3/Cdh11/Hnf4a/Gjb2/Grhl2/Cldn11/Camsap3/Agt/Cgn/Nphs1/Wnt11	29
GO:0005216	MF	GO:0005216	monoatomic ion channel activity	55/1453	434/22548	0.126728	1.9666	5.33635	1.23892975623009e-06	0.000394393	0.00035429	Gabre/Gabra3/Kcnj8/Kcnh8/Abcc9/Cacna2d3/Trpm1/Kcne4/Cnga1/Kcnk10/Pkd1l3/Nalcn/Tmem266/Gabrr3/Scn3b/Kcnip1/Trpm6/Cftr/Kcnq5/Chrng/Kcng2/Kcnn2/Cngb1/Kcne2/Kcnd3/Slc24a1/Asic1/Grin3a/Kcnu1/Scnn1g/Cacng3/Kcnma1/Clic3/Kcnk12/Kcna2/Cacng1/Cacng5/Hcn3/Chrne/Kcnj16/Kcnmb2/Kcnmb3/Kcnn1/Slc1a4/Gabrd/Tmc2/Ttyh1/Kcnk2/Slc17a8/P2rx3/Scn3a/Scn2a/Catsper4/Tmem150c/Grin1	55
GO:0043235	CC	GO:0043235	receptor complex	52/1470	415/22834	0.125301	1.94635	5.10346	3.26628680239531e-06	0.000569423	0.000503123	Gabre/Gabra3/Shisa8/Vldlr/Ceacam1/Ceacam2/Kctd8/Ighd/Ahrr/Kctd16/Pkd1l3/Tgfbr3/Lrrtm4/Gabrr3/Alk/Adgrv1/Pdgfra/Chrng/Klrc1/Tas1r2/Cd14/Gp1bb/Nlgn1/Smad3/Fgfr4/Cr2/Itga4/Gabbr2/Grin3a/Vwc2l/Cacng3/Ror2/Cacng5/Trat1/Bmp2/Gp9/Chrne/Gp1ba/Gpr84/Cd3d/Lrp1b/Acvr1c/Gabrd/Itgb6/Cd79b/Traf4/Zap70/P2rx3/Itga2b/Cd79a/Itgad/Grin1	52
GO:0030595	BP	GO:0030595	leukocyte chemotaxis	29/1454	237/23040	0.122363	1.93895	3.77095	0.000490465	0.0369652	0.0327811	Jam3/Wnt5a/Tafa4/Mmp2/Slc12a2/F2rl1/Stap1/Ptpro/Ctsg/Slit2/Ppbp/Cxcl3/Gpr35/Cxcl9/Ptn/Il12a/Dpep1/Ccl19/S100a14/Ccl4/Zfp580/Trem1/Cxcl13/Ccl11/Ccl12/Cxcl17/Padi2/Defb25/Slamf1	29
GO:0099173	BP	GO:0099173	postsynapse organization	31/1454	255/23040	0.121569	1.92637	3.86063	0.000358399	0.0315816	0.0280069	Zdhhc15/Tiam1/Shank2/Wnt5a/Lrrtm4/Myo5b/Ephb3/Ppfia2/Il1rapl1/Lzts1/Frmpd4/Colq/Ngef/Sptbn2/Ephb1/Mpp2/Xlr3b/Epha7/Reln/Nlgn1/Ptn/Psd/Ror2/Adgrb1/Grip2/Arhgap44/Ptprd/Camk2b/Shank1/Shisa7/Grin1	31
GO:0022853	MF	GO:0022853	active monoatomic ion transmembrane transporter activity	29/1453	234/22548	0.123932	1.9232	3.72566	0.000555033	0.0179078	0.0160869	Kcnj8/Slc1a3/Abcc9/Atp7b/Slc22a3/Slc8a3/Slc9b2/Atp13a5/Atp13a4/Slc6a14/Slc12a2/Slc28a2/Slc28a1/Slc26a3/Slc28a3/Slc4a9/Atp1a3/Slc24a1/Slc5a11/Slc6a12/Atp1a2/Slc4a3/Slc45a3/Slc13a4/Slc32a1/Slc17a8/Slc4a1/Mfsd2a/Slc16a3	29
GO:0043679	CC	GO:0043679	axon terminus	25/1470	203/22834	0.123153	1.91297	3.4273	0.00139232	0.0330991	0.0292453	Cnga1/Oprd1/Syp/Slc8a3/Pclo/Kcnq5/Esr1/Tnn/Snca/Cngb1/Atp1a3/Penk/L1cam/Unc13a/Kcnma1/Kcna2/Tulp1/Hcn3/Gper1/Ptprn/Slc32a1/Kcnk2/Slc17a8/P2rx3/Grin1	25
GO:0007286	BP	GO:0007286	spermatid development	33/1454	275/23040	0.12	1.90151	3.9033	0.000299274	0.0277844	0.0246395	Gm21865/Jam3/Spag6l/Sycp3/Zpbp2/Ccdc38/Adad1/Cftr/Cfap43/Spag17/Armc3/Dnah1/1700013H16Rik/Slc26a3/Dnali1/Xlr3b/Xlr4c/Spata16/Ccdc42/Spaca1/Dmc1/Cfap73/Osbp2/3830403N18Rik/Xlr5a/Cfap65/Tdrd5/Pygo1/Spem1/Brdt/Spag6/Catsper4/Ica1l	33
GO:0001664	MF	GO:0001664	G protein-coupled receptor binding	41/1453	335/22548	0.122388	1.89925	4.35196	6.02883100564236e-05	0.00338678	0.00304241	Mrap/Homer2/Defb47/Wnt5a/Wnt9a/Mrap2/Hba-a1/Hba-a2/Gna14/Esr1/Bambi/Sfrp1/Rspo1/Wnt8b/Npb/Atp1a3/Penk/Ppbp/Cxcl3/Saa1/Qrfp/Wnt10b/Ccrl2/Cxcl9/Npw/Defb34/Ccl19/Ror2/Agt/S100a14/Ccl4/Wnt6/Nppa/Ptger1/Cxcl13/Ccl11/Ccl12/Cxcl17/Wnt11/Shank1/Dnm1	41
GO:0030198	BP	GO:0030198	extracellular matrix organization	39/1454	327/23040	0.119266	1.88988	4.20627	0.000101588	0.0146157	0.0129614	Rxfp1/Col3a1/Ecm2/Adamts17/Lama1/Tgfbr3/Col4a4/Sulf1/Adamts20/Pdgfra/Adamts18/Adamtsl1/Adamts7/Col17a1/Loxl1/Mmp2/Colq/Col9a2/Prdm5/Ctsg/Smad3/Lamb3/Fgfr4/Adamts3/Dpt/Noxo1/Col8a1/Foxc2/Fn1/Agt/Col13a1/Bmp2/Sox9/Adamts9/Mia/Col1a1/Mmp20/Col16a1/Tcf15	39
GO:0045229	BP	GO:0045229	external encapsulating structure organization	39/1454	328/23040	0.118902	1.88412	4.18552	0.000108436	0.0148358	0.0131566	Rxfp1/Col3a1/Ecm2/Adamts17/Lama1/Tgfbr3/Col4a4/Sulf1/Adamts20/Pdgfra/Adamts18/Adamtsl1/Adamts7/Col17a1/Loxl1/Mmp2/Colq/Col9a2/Prdm5/Ctsg/Smad3/Lamb3/Fgfr4/Adamts3/Dpt/Noxo1/Col8a1/Foxc2/Fn1/Agt/Col13a1/Bmp2/Sox9/Adamts9/Mia/Col1a1/Mmp20/Col16a1/Tcf15	39
GO:0003341	BP	GO:0003341	cilium movement	29/1454	244/23040	0.118852	1.88333	3.60011	0.000786801	0.0462582	0.0410223	Spag6l/Ttll8/Dnah7c/Hydin/Ccdc38/Tacr1/Qrich2/Tekt5/Cfap43/Spag17/Slc9b2/Slc9b1/Armc3/Adam3/Dnah1/Tekt3/Dnali1/Cfap52/Dnah12/Camsap3/Dnaaf1/Spata33/Cfap65/Cfap70/Spem1/Cyb5d1/Spag6/Dnah17/Catsper4	29
GO:0043062	BP	GO:0043062	extracellular structure organization	39/1454	329/23040	0.118541	1.87839	4.16483	0.0001157	0.0150381	0.0133359	Rxfp1/Col3a1/Ecm2/Adamts17/Lama1/Tgfbr3/Col4a4/Sulf1/Adamts20/Pdgfra/Adamts18/Adamtsl1/Adamts7/Col17a1/Loxl1/Mmp2/Colq/Col9a2/Prdm5/Ctsg/Smad3/Lamb3/Fgfr4/Adamts3/Dpt/Noxo1/Col8a1/Foxc2/Fn1/Agt/Col13a1/Bmp2/Sox9/Adamts9/Mia/Col1a1/Mmp20/Col16a1/Tcf15	39
GO:0008514	MF	GO:0008514	organic anion transmembrane transporter activity	32/1453	269/22548	0.118959	1.84604	3.66357	0.000609347	0.0179078	0.0160869	Slco1c1/Slco1b2/Slc25a21/Slco1a6/Slc1a3/Ceacam1/Ceacam2/Slc22a27/Slc22a3/Cftr/Slc25a29/Slc7a1/Slc6a14/Slc51a/Slc26a3/Slc35d3/Slc4a9/Grin3a/Slc6a12/Slc16a13/Slc6a19/Slc4a3/Slc16a5/Slc1a4/Slc32a1/Slc17a8/Slc4a1/Mfsd2a/Abcb11/AU018091/Slc16a3/Grin1	32
GO:0097729	CC	GO:0097729	9+2 motile cilium	28/1470	236/22834	0.118644	1.84294	3.41441	0.00132732	0.0330567	0.0292078	Akap14/Spag6l/Ttll8/Cabcoco1/Dnah7c/Aldoart1/Ccdc38/Tacr1/Qrich2/Tekt5/Cfap43/Slc9b2/Slc9b1/Dnah1/Slc26a3/Tekt3/Dnali1/Cfap52/Pfkm/Odf4/Dnah12/Cfap126/Spata33/Cfap65/Cfap70/Spag6/Dnah17/Catsper4	28
GO:0016358	BP	GO:0016358	dendrite development	38/1454	327/23040	0.116208	1.84142	3.97722	0.00021144	0.0224342	0.0198949	Zdhhc15/Tiam1/Vldlr/Wnt5a/Alk/Mcf2/Myo5b/Robo1/Ephb3/Ppfia2/Dgkg/Il1rapl1/Csmd3/Fat3/Lzts1/Ngef/Dab1/Ephb1/Xlr3b/Reln/Nlgn1/Ptn/Grin3a/Lst1/Bmp5/Crp/Tulp1/Mgarp/Lpar1/Sema3a/Arhgap44/Actl6b/Ptprd/Camk2b/Mfsd2a/Adgrb3/Shank1/Grin1	38
GO:0006935	BP	GO:0006935	chemotaxis	53/1454	458/23040	0.115721	1.8337	4.67724	1.50105639483821e-05	0.00433555	0.00384481	Tiam1/Jam3/Defb47/Wnt5a/Fgf2/Agr2/Arhgef16/Robo1/Tafa4/Pdgfra/Angpt1/Lef1/Hgf/Mmp2/Slc12a2/F2rl1/Stap1/Unc5c/Ephb1/Ptpro/Snai2/Ctsg/Smad3/Slit2/Ppbp/Cxcl3/Gpr35/Ccrl2/Cxcl9/Ptn/Nr4a1/Ccr4/Il12a/Fn1/Robo2/Dpep1/Ccl19/Rnase2a/Lpar1/Sema3a/S100a14/Ccl4/Pik3c2g/Zfp580/Trem1/Cxcl13/Ccl11/Ccl12/Cxcl17/Padi2/Fgf7/Defb25/Slamf1	53
GO:0098862	CC	GO:0098862	cluster of actin-based cell projections	25/1470	212/22834	0.117925	1.83176	3.19154	0.00253557	0.0491149	0.0433963	Tiam1/Shank2/Homer2/Scin/Myo5b/Adgrv1/Ace2/Pdzk1/Trpm6/Pls1/Slc6a14/Slc28a2/Slc28a1/Slc26a3/Slc28a3/Dab1/Pjvk/Tspear/Espnl/Slc6a19/Plb1/Cgn/Nppa/Tmc2/Myo3a	25
GO:0051924	BP	GO:0051924	regulation of calcium ion transport	32/1454	277/23040	0.115523	1.83058	3.60939	0.00071089	0.0436603	0.0387184	Tlr9/Homer2/Cd19/Trdn/Oprd1/Sln/Gimap3/Gpr39/F2/Snca/Ms4a1/Ptpn22/Sestd1/Gstm7/Gpr35/Hes1/Cxcl9/Rgs4/Wnk3/Bdkrb1/Bcl2/Agt/Atp1a2/Cacng1/Glp1r/Gper1/Casq1/Gjc2/Nppa/Tmc2/Il13/Grin1	32
GO:0048515	BP	GO:0048515	spermatid differentiation	33/1454	286/23040	0.115385	1.82838	3.65856	0.000604868	0.0408404	0.0362176	Gm21865/Jam3/Spag6l/Sycp3/Zpbp2/Ccdc38/Adad1/Cftr/Cfap43/Spag17/Armc3/Dnah1/1700013H16Rik/Slc26a3/Dnali1/Xlr3b/Xlr4c/Spata16/Ccdc42/Spaca1/Dmc1/Cfap73/Osbp2/3830403N18Rik/Xlr5a/Cfap65/Tdrd5/Pygo1/Spem1/Brdt/Spag6/Catsper4/Ica1l	33
GO:0042330	BP	GO:0042330	taxis	53/1454	460/23040	0.115217	1.82573	4.64282	1.69521303202646e-05	0.00463864	0.00411359	Tiam1/Jam3/Defb47/Wnt5a/Fgf2/Agr2/Arhgef16/Robo1/Tafa4/Pdgfra/Angpt1/Lef1/Hgf/Mmp2/Slc12a2/F2rl1/Stap1/Unc5c/Ephb1/Ptpro/Snai2/Ctsg/Smad3/Slit2/Ppbp/Cxcl3/Gpr35/Ccrl2/Cxcl9/Ptn/Nr4a1/Ccr4/Il12a/Fn1/Robo2/Dpep1/Ccl19/Rnase2a/Lpar1/Sema3a/S100a14/Ccl4/Pik3c2g/Zfp580/Trem1/Cxcl13/Ccl11/Ccl12/Cxcl17/Padi2/Fgf7/Defb25/Slamf1	53
GO:1902495	CC	GO:1902495	transmembrane transporter complex	50/1470	426/22834	0.117371	1.82316	4.4987	2.97837471400889e-05	0.00259615	0.00229387	Gabre/Gabra3/Shisa8/Atp1b4/Kcnj8/Kcnh8/Abcc9/Cacna2d3/Trdn/Kcne4/Cnga1/Pkd1l3/Nalcn/Lrrtm4/Gabrr3/Scn3b/Kcnip1/Cftr/Kcnq5/Chrng/Kcng2/Cngb1/Atp1a3/Kcne2/Kcnd3/Sestd1/Grin3a/Kcnu1/Vwc2l/Scnn1g/Cacng3/Kcnma1/Clic3/Kcna2/Atp1a2/Cacng1/Cacng5/Hcn3/Chrne/Kcnj16/Kcnmb2/Kcnmb3/Gabrd/Ttyh1/Kcnk2/Slc17a8/Scn3a/Scn2a/Catsper4/Grin1	50
GO:0015291	MF	GO:0015291	secondary active transmembrane transporter activity	34/1453	293/22548	0.116041	1.80075	3.6208	0.000656306	0.0179078	0.0160869	Slco1c1/Slco1b2/Slc25a21/Slco1a6/Slc1a3/Slc17a1/Slc22a27/Slc22a3/Slc8a3/Slc9b2/Slc9b1/Slc6a14/Slc12a2/Slc28a2/Slc28a1/Slc26a3/Slc28a3/Slc35d3/Slc4a9/Slc24a1/Slc5a11/Slc6a12/Slc16a13/Slc6a19/Slc4a3/Slc45a3/Slc16a5/Slc1a4/Slc13a4/Slc32a1/Slc17a8/Slc4a1/Mfsd2a/Slc16a3	34
GO:1904062	BP	GO:1904062	regulation of monoatomic cation transmembrane transport	37/1454	327/23040	0.11315	1.79297	3.74817	0.000427784	0.0342161	0.0303432	Tlr9/Kcnj8/Abcc9/Cd19/Trdn/Kcne4/Sln/Gimap3/Scn3b/Kcnip1/Gpr39/F2/Snca/Kcnn2/Ms4a1/Ptpn22/Kcne2/Sestd1/Gstm7/Gpr35/Cxcl9/Rgs4/Wnk3/Fxyd3/Bdkrb1/Bcl2/Atp1a2/Cacng1/Rgs7/Gper1/Casq1/Pcsk9/Gjc2/Nppa/Tmc2/Il13/Grin1	37
GO:0060485	BP	GO:0060485	mesenchyme development	35/1454	313/23040	0.111821	1.77191	3.56858	0.000746246	0.0445947	0.039547	Tiam1/Rbm24/Wnt5a/Hey2/Cyp26c1/Tgfbr3/Six1/Robo1/Lef1/Pdcd4/Bambi/Sfrp1/Msx1/Ranbp3l/Foxd1/Snai2/Smad3/Hes1/Itga4/Bcl2/Foxc2/Fn1/Robo2/Pax6/Agt/Bmp5/Bmp2/Sox9/Radil/Sema3a/Col1a1/Crb2/Dll3/Tcf15/Wnt11	35
GO:0007611	BP	GO:0007611	learning or memory	37/1454	334/23040	0.110778	1.75539	3.60912	0.000639399	0.0410399	0.0363946	Camk4/Shank2/Adam2/Brinp1/Tafa2/Csmd1/Tacr1/Foxp2/Esr2/Sorcs3/Adra1b/Slc8a3/Bglap/Atp1a3/Reln/Egr1/Ptn/Lmx1a/Nps/Asic1/Pax6/Agt/Atp1a2/Glp1r/B4galt2/Chst10/Htr6/Ccl11/Clstn3/Scn2a/Adgrb3/Pak6/Shank1/Shisa7/Klk8/Grin1/Oprl1	37
GO:0090287	BP	GO:0090287	regulation of cellular response to growth factor stimulus	36/1454	327/23040	0.110092	1.74451	3.51912	0.000840902	0.046509	0.0412447	Hhip/Fstl5/Wnt5a/Tgfbr3/Fgf2/Sulf1/Robo1/Angpt1/Il17f/Il12b/Dlx1/Cyfip2/Fst/Bambi/Sfrp1/Spry4/Msx1/Sost/Foxd1/Smad3/Tmprss6/Adamts3/Veph1/Slit2/Cilp/Bmper/Fgfbp3/Hes1/Vwc2l/Il12a/Agt/Bmp2/Fam20c/Crb2/Cxcl13/Wfikkn2	36
GO:0034765	BP	GO:0034765	regulation of monoatomic ion transmembrane transport	40/1454	365/23040	0.109589	1.73654	3.68127	0.000490594	0.0369652	0.0327811	Tlr9/Kcnj8/Abcc9/Cd19/Trdn/Kcne4/Sln/Gimap3/Scn3b/Kcnip1/Gpr39/Cftr/F2/Snca/Kcnn2/Ms4a1/Ptpn22/Reln/Kcne2/Sestd1/Gstm7/Gpr35/Cxcl9/Rgs4/Wnk3/Fxyd3/Bdkrb1/Bcl2/Atp1a2/Cacng1/Rgs7/Kcnj16/Gper1/Casq1/Pcsk9/Gjc2/Nppa/Tmc2/Il13/Grin1	40
GO:0062023	CC	GO:0062023	collagen-containing extracellular matrix	44/1470	395/22834	0.111392	1.7303	3.84056	0.000283075	0.009253	0.00817564	Srpx2/Col12a1/Col3a1/Ecm2/Lamc2/Adamts17/Lama1/Col4a4/Gpc4/Emilin2/Itih4/Lum/Adamtsl1/Col25a1/Angpt1/Col17a1/Pcolce2/Loxl1/Sfrp1/Tnn/Colq/Col9a2/F2/Reln/Lamb3/Dpt/Slit2/Cilp/Bmper/Fibcd1/Col8a1/Ptn/Fn1/Angptl2/Col13a1/S100a3/Col1a1/Prss2/Spn/Pcsk6/Nphs1/Angptl1/Fcna/Col16a1	44
GO:1990351	CC	GO:1990351	transporter complex	50/1470	452/22834	0.110619	1.71829	4.04593	0.000134155	0.00584693	0.00516616	Gabre/Gabra3/Shisa8/Atp1b4/Kcnj8/Kcnh8/Abcc9/Cacna2d3/Trdn/Kcne4/Cnga1/Pkd1l3/Nalcn/Lrrtm4/Gabrr3/Scn3b/Kcnip1/Cftr/Kcnq5/Chrng/Kcng2/Cngb1/Atp1a3/Kcne2/Kcnd3/Sestd1/Grin3a/Kcnu1/Vwc2l/Scnn1g/Cacng3/Kcnma1/Clic3/Kcna2/Atp1a2/Cacng1/Cacng5/Hcn3/Chrne/Kcnj16/Kcnmb2/Kcnmb3/Gabrd/Ttyh1/Kcnk2/Slc17a8/Scn3a/Scn2a/Catsper4/Grin1	50
GO:0016324	CC	GO:0016324	apical plasma membrane	47/1470	426/22834	0.110329	1.71377	3.90087	0.00022327	0.00778467	0.00687827	Tlr9/Shank2/Slc17a1/Ceacam1/Ceacam2/Fzd3/Kcne4/Slc2a5/Mlc1/BC034090/Slc22a3/Ace2/Pdzk1/Trpm6/Cftr/Pkhd1/Lzts1/Slc7a1/Slc9b2/Pappa2/Slc6a14/Slc12a2/Muc13/Slc28a1/Slc26a3/Sptbn2/Mpp3/Cd300lg/Ptpro/Kcne2/Pfkm/Cfap126/Aqp5/Scnn1g/Fn1/Kcnma1/Epcam/Slc6a19/Prkab2/Slc29a4/Il10ra/Crb2/Upk1a/Kcnk2/Cd55/Abcb11/Slc16a3	47
GO:0050890	BP	GO:0050890	cognition	40/1454	374/23040	0.106952	1.69475	3.51566	0.000791879	0.0462582	0.0410223	Camk4/Shank2/Adam2/Brinp1/Tafa2/Csmd1/Tacr1/Foxp2/Esr2/Sorcs3/Adra1b/Slc8a3/Bglap/Jakmip1/Atp1a3/Reln/Egr1/Ptn/Lmx1a/Nps/Asic1/Pax6/Agt/Atp1a2/Glp1r/B4galt2/Chst10/Htr6/Slc1a4/Ccl11/Clstn3/Mfsd2a/Scn2a/Adgrb3/Pak6/Shank1/Shisa7/Klk8/Grin1/Oprl1	40
GO:0010959	BP	GO:0010959	regulation of metal ion transport	45/1454	430/23040	0.104651	1.6583	3.57629	0.00061586	0.0409546	0.036319	Tlr9/Nkain1/Homer2/Abcc9/Cd19/Trdn/Kcne4/Oprd1/Sln/Gimap3/Scn3b/Kcnip1/Gpr39/F2/Snca/Kcnn2/Ms4a1/Ptpn22/Sik1/Kcne2/Sestd1/Gstm7/Gpr35/Hes1/Cxcl9/Rgs4/Wnk3/Fxyd3/Bdkrb1/Bcl2/Agt/Atp1a2/Cacng1/Rgs7/Glp1r/Gper1/Casq1/Pcsk9/Gjc2/Nppa/Tmc2/Il13/Gck/Nkain3/Grin1	45
GO:0099572	CC	GO:0099572	postsynaptic specialization	46/1470	433/22834	0.106236	1.65019	3.58303	0.000594376	0.0155429	0.0137332	Gabra3/Tiam1/Shisa8/Shank2/Homer2/Cdh10/Oprd1/Epb41l3/Syp/Lrrtm4/Ppfia2/Il1rapl1/Neto2/Lzts1/Sorcs3/Slc8a3/Pclo/Frmpd4/Dnajc6/Mpp2/Ptpro/Epha7/Nlgn1/Kcnd3/Prr7/Ptprt/Lrrc4c/Grin3a/Psd/Cacng3/Cacng5/Chrne/Adgrb1/Gper1/Syn2/Grip2/Arhgap44/Clstn3/Camk2b/Insyn2b/Adgrb3/Pak6/Shank1/Shisa7/Slc16a3/Grin1	46
GO:0098984	CC	GO:0098984	neuron to neuron synapse	47/1470	444/22834	0.105856	1.64429	3.59623	0.000563834	0.0155203	0.0137132	Tiam1/Shisa8/Shank2/Homer2/Oprd1/Epb41l3/Syp/Lrrtm4/Il1rapl1/Neto2/Elavl2/Lzts1/Sorcs3/Slc8a3/Pclo/Frmpd4/Dnajc6/Mpp2/Ptpro/Atp1a3/Epha7/Nlgn1/Penk/Prr7/Ptprt/Lrrc4c/Grin3a/Psd/Cacng3/Cacng5/Adgrb1/Gper1/Sema3a/Syn2/Grip2/Arhgap44/Ptprd/P2rx3/Clstn3/Camk2b/Insyn2b/Adgrb3/Pak6/Shank1/Shisa7/Slc16a3/Grin1	47
GO:0022804	MF	GO:0022804	active transmembrane transporter activity	46/1453	437/22548	0.105263	1.6335	3.5097	0.000736597	0.0195403	0.0175534	Slco1c1/Slco1b2/Slc25a21/Slco1a6/Kcnj8/Slc1a3/Slc17a1/Abcc9/Slc22a27/Atp7b/Slc22a3/Cftr/Slc8a3/Slc9b2/Slc9b1/Atp13a5/Atp13a4/Slc6a14/Slc12a2/Slc28a2/Slc28a1/Slc26a3/Slc28a3/Slc35d3/Slc4a9/Atp1a3/Slc24a1/Slc5a11/Slc6a12/Atp1a2/Slc16a13/Slc6a19/Slc4a3/Slc45a3/Slc29a4/Slc16a5/Slc1a4/Slc13a4/Slc32a1/Slc17a8/Slc4a1/Mfsd2a/Abca8a/Abca5/Abcb11/Slc16a3	46
GO:0014069	CC	GO:0014069	postsynaptic density	40/1470	381/22834	0.104987	1.6308	3.25697	0.00162695	0.035454	0.031326	Tiam1/Shisa8/Shank2/Homer2/Oprd1/Epb41l3/Syp/Lrrtm4/Il1rapl1/Neto2/Lzts1/Sorcs3/Slc8a3/Pclo/Frmpd4/Dnajc6/Mpp2/Ptpro/Epha7/Prr7/Ptprt/Lrrc4c/Grin3a/Psd/Cacng3/Cacng5/Adgrb1/Gper1/Syn2/Grip2/Arhgap44/Clstn3/Camk2b/Insyn2b/Adgrb3/Pak6/Shank1/Shisa7/Slc16a3/Grin1	40
GO:0007281	BP	GO:0007281	germ cell development	47/1454	458/23040	0.10262	1.62611	3.51262	0.000722213	0.0436603	0.0387184	Gm21865/Jam3/Spag6l/Sycp3/Zpbp2/Ccdc38/Adad1/Inhbb/Cftr/Cfap43/Spag17/Rec114/Zar1l/Armc3/Dnah1/Mycn/1700013H16Rik/Bmp8b/Slc26a3/Dnali1/Gpr149/Xlr3b/Xlr4c/Spata16/Ccdc42/Spaca1/4930447C04Rik/Ptn/Majin/Dmc1/Cfap73/Bcl2/Osbp2/3830403N18Rik/Nanos3/Xlr5a/Cfap65/Tut4/Tdrd5/Pygo1/Stra8/Spem1/Brdt/Ndn/Spag6/Catsper4/Ica1l	47
GO:0032279	CC	GO:0032279	asymmetric synapse	42/1470	404/22834	0.10396	1.61485	3.27073	0.00152645	0.0347101	0.0306687	Tiam1/Shisa8/Shank2/Homer2/Oprd1/Epb41l3/Syp/Lrrtm4/Il1rapl1/Neto2/Elavl2/Lzts1/Sorcs3/Slc8a3/Pclo/Frmpd4/Dnajc6/Mpp2/Ptpro/Epha7/Prr7/Ptprt/Lrrc4c/Grin3a/Psd/Cacng3/Cacng5/Adgrb1/Gper1/Sema3a/Syn2/Grip2/Arhgap44/Clstn3/Camk2b/Insyn2b/Adgrb3/Pak6/Shank1/Shisa7/Slc16a3/Grin1	42
(b) Downregulated DEGs
	ONTOLOGY	ID	Description	GeneRatio	BgRatio	RichFactor	FoldEnrichment	zScore	pvalue	p.adjust	qvalue	geneID	Count
GO:0140776	MF	GO:0140776	protein-containing complex destabilizing activity	6/1651	11/22548	0.545455	7.44937	6.0137	5.11625871655197e-05	0.00867206	0.00796162	Hspa1b/Hspa1a/Fignl2/Hspa8/Fignl1/Katnal1	6
GO:0033085	BP	GO:0033085	negative regulation of T cell differentiation in thymus	6/1654	13/23040	0.461538	6.42917	5.44529	0.000149825	0.0163633	0.0144043	Erbb2/Bmp4/Cdkn2a/Ihh/Clec4g/Foxj1	6
GO:0048251	BP	GO:0048251	elastic fiber assembly	5/1654	11/23040	0.454545	6.33176	4.91885	0.000606646	0.0296405	0.026092	Myh11/Efemp2/Fbln5/Thsd4/Emilin1	5
GO:1901722	BP	GO:1901722	regulation of cell proliferation involved in kidney development	7/1654	16/23040	0.4375	6.09432	5.66879	6.22624434366888e-05	0.00937302	0.00825088	Myc/Ifng/Bmp4/Serpinb7/C3ar1/Gata3/Lin28a	7
GO:0042045	BP	GO:0042045	epithelial fluid transport	5/1654	12/23040	0.416667	5.80411	4.62925	0.000978608	0.0386585	0.0340303	Edn1/Ednrb/Aqp1/Csf2/Scnn1b	5
GO:1904672	BP	GO:1904672	regulation of somatic stem cell population maintenance	5/1654	12/23040	0.416667	5.80411	4.62925	0.000978608	0.0386585	0.0340303	Myc/Trp63/Taf6l/Tal1/Tcf7l1	5
GO:0099550	BP	GO:0099550	trans-synaptic signaling, modulating synaptic transmission	6/1654	15/23040	0.4	5.57195	4.92586	0.000385557	0.0241298	0.021241	Gucy1a1/Grm5/Ephb2/Ntrk2/Bdnf/Efnb3	6
GO:0005865	CC	GO:0005865	striated muscle thin filament	9/1659	23/22834	0.391304	5.3858	5.89025	1.76939692429741e-05	0.00140388	0.00122663	Actn2/Tnnc1/Fhod3/Tmod4/Acta1/Tpm2/Lmod1/Tnnt2/Ttn	9
GO:0001758	MF	GO:0001758	retinal dehydrogenase activity	7/1651	18/22548	0.388889	5.31112	5.14307	0.000172517	0.0146208	0.013423	Aldh1a3/Akr1c14/Akr1c12/Akr1b8/Akr1b7/Aldh8a1/Akr1cl	7
GO:0015280	MF	GO:0015280	ligand-gated sodium channel activity	6/1651	16/22548	0.375	5.12144	4.63538	0.000644172	0.0344802	0.0316554	Asic5/Grik2/Asic2/Scnn1b/Asic4/Asic3	6
GO:0036379	CC	GO:0036379	myofilament	10/1659	27/22834	0.37037	5.09767	5.96318	1.06822346080934e-05	0.000995228	0.000869571	Obscn/Actn2/Tnnc1/Fhod3/Tmod4/Acta1/Tpm2/Lmod1/Tnnt2/Ttn	10
GO:0072111	BP	GO:0072111	cell proliferation involved in kidney development	8/1654	22/23040	0.363636	5.06541	5.30538	8.90519492189682e-05	0.0121344	0.0106817	Myc/Ifng/Osr1/Bmp4/Serpinb7/C3ar1/Gata3/Lin28a	8
GO:0010832	BP	GO:0010832	negative regulation of myotube differentiation	6/1654	17/23040	0.352941	4.91642	4.49229	0.000841487	0.0359837	0.0316757	Bhlha15/Bhlhe41/Ccn3/Bdnf/Myocd/Plpp7	6
GO:0000940	CC	GO:0000940	outer kinetochore	8/1659	23/22834	0.347826	4.78738	5.08655	0.000139181	0.00648351	0.0056649	Cenpe/Ska1/Cenpf/Ccnb1/Nuf2/Plk1/Knl1/Spdl1	8
GO:0051988	BP	GO:0051988	regulation of attachment of spindle microtubules to kinetochore	7/1654	21/23040	0.333333	4.64329	4.6451	0.000459975	0.0266881	0.023493	Cenpe/Cdca8/Nek2/Ect2/Ccnb1/Spag5/Aurkb	7
GO:0032982	CC	GO:0032982	myosin filament	7/1659	22/22834	0.318182	4.37936	4.43872	0.00068043	0.0159757	0.0139586	Myh11/Obscn/Myom1/Myo18b/Myh6/Myh7b/Mybpc2	7
GO:0021871	BP	GO:0021871	forebrain regionalization	8/1654	27/23040	0.296296	4.12737	4.52178	0.000447439	0.0265132	0.023339	Nkx2-1/Dmrta2/Nr2f1/Fgf8/Bhlhe22/Bmp4/Lhx1/Lhx2	8
GO:0042026	BP	GO:0042026	protein refolding	7/1654	24/23040	0.291667	4.06288	4.17499	0.00113163	0.0437721	0.0385317	Dnaja4/Dnaja1/Hspa1b/Hspa1a/Hspa13/Hspb1/Hspa8	7
GO:0072012	BP	GO:0072012	glomerulus vasculature development	8/1654	28/23040	0.285714	3.97996	4.38781	0.000587301	0.0290235	0.0255488	Edn1/Ifng/Aqp1/Osr1/Notch3/Bmp4/Serpinb7/C3ar1	8
GO:0003180	BP	GO:0003180	aortic valve morphogenesis	8/1654	29/23040	0.275862	3.84272	4.25991	0.000760445	0.0333848	0.0293879	Adamts5/Bmp4/Hey1/Eln/Axin2/Smad6/Emilin1/Gata3	8
GO:0061437	BP	GO:0061437	renal system vasculature development	8/1654	29/23040	0.275862	3.84272	4.25991	0.000760445	0.0333848	0.0293879	Edn1/Ifng/Aqp1/Osr1/Notch3/Bmp4/Serpinb7/C3ar1	8
GO:0061440	BP	GO:0061440	kidney vasculature development	8/1654	29/23040	0.275862	3.84272	4.25991	0.000760445	0.0333848	0.0293879	Edn1/Ifng/Aqp1/Osr1/Notch3/Bmp4/Serpinb7/C3ar1	8
GO:0045499	MF	GO:0045499	chemorepellent activity	8/1651	29/22548	0.275862	3.7675	4.19167	0.000866233	0.0419504	0.0385137	Flrt2/Sema5a/Sema3f/Sema3d/Sema3e/Sema4g/Sema6a/Apoa1	8
GO:0045880	BP	GO:0045880	positive regulation of smoothened signaling pathway	12/1654	45/23040	0.266667	3.71463	5.06915	5.57582519035506e-05	0.00862704	0.00759421	Foxa1/Scube1/Dcdc2a/Ttc23/Tedc1/Prrx1/Dlg5/Dhh/Scube3/Ihh/Foxa2/Stk36	12
GO:0022010	BP	GO:0022010	central nervous system myelination	8/1654	30/23040	0.266667	3.71463	4.13759	0.000972354	0.0386585	0.0340303	Cntn1/Gpm6b/Cntnap1/Tenm4/Mal/Myrf/Hes5/Fgfr3	8
GO:0032291	BP	GO:0032291	axon ensheathment in central nervous system	8/1654	30/23040	0.266667	3.71463	4.13759	0.000972354	0.0386585	0.0340303	Cntn1/Gpm6b/Cntnap1/Tenm4/Mal/Myrf/Hes5/Fgfr3	8
GO:0085029	BP	GO:0085029	extracellular matrix assembly	13/1654	49/23040	0.265306	3.69568	5.25318	2.92068298689685e-05	0.00602526	0.00530391	Myh11/Has2/Efemp2/Ntn4/Fbln5/Prickle1/Gpm6b/Thsd4/Pparg/Eln/Ihh/Emilin1/Has1	13
GO:0016339	BP	GO:0016339	calcium-dependent cell-cell adhesion via plasma membrane cell adhesion molecules	10/1654	38/23040	0.263158	3.66575	4.57366	0.000260001	0.0201674	0.0177529	Cdh2/Pcdh1/Pcdh12/Cdh6/Pcdh18/Cdh13/Pcdhb16/Ajuba/Cdh17/Cdh3	10
GO:0042805	MF	GO:0042805	actinin binding	11/1651	41/22548	0.268293	3.66412	4.79914	0.000127236	0.012698	0.0116577	Pdlim3/Magi1/Trpc5/Ldb3/Prickle4/Pparg/Cacna1c/Lmo7/Trpc6/Mypn/Ttn	11
GO:0045839	BP	GO:0045839	negative regulation of mitotic nuclear division	15/1654	60/23040	0.25	3.48247	5.3545	1.58355842671784e-05	0.00441021	0.00388222	Ttk/Cenpe/Cdc20/Fbxo5/Cdca8/Nme6/Ccnb1/Bmp4/Nuf2/Plk1/Khdc3/Knl1/Fgfr3/Aurkb/Spdl1	15
GO:0030574	BP	GO:0030574	collagen catabolic process	10/1654	40/23040	0.25	3.48247	4.37003	0.00040867	0.0250142	0.0220195	Mmp19/Adamts2/Mmp16/Mmp8/Mmp27/Mmp23/Mmp12/Mmp17/Mmp21/Prtn3	10
GO:0005272	MF	GO:0005272	sodium channel activity	11/1651	44/22548	0.25	3.41429	4.5057	0.000251979	0.0170842	0.0156846	Asic5/Grik2/Kcnk1/Asic2/Scn1b/Scnn1b/Scn8a/Scn4b/Slc4a11/Asic4/Asic3	11
GO:0033046	BP	GO:0033046	negative regulation of sister chromatid segregation	12/1654	50/23040	0.24	3.34317	4.61268	0.000168384	0.0164544	0.0144844	Ttk/Cenpe/Cdc20/Fbxo5/Cdca8/Ccnb1/Nuf2/Plk1/Khdc3/Knl1/Aurkb/Spdl1	12
GO:0033048	BP	GO:0033048	negative regulation of mitotic sister chromatid segregation	12/1654	50/23040	0.24	3.34317	4.61268	0.000168384	0.0164544	0.0144844	Ttk/Cenpe/Cdc20/Fbxo5/Cdca8/Ccnb1/Nuf2/Plk1/Khdc3/Knl1/Aurkb/Spdl1	12
GO:0045841	BP	GO:0045841	negative regulation of mitotic metaphase/anaphase transition	12/1654	50/23040	0.24	3.34317	4.61268	0.000168384	0.0164544	0.0144844	Ttk/Cenpe/Cdc20/Fbxo5/Cdca8/Ccnb1/Nuf2/Plk1/Khdc3/Knl1/Aurkb/Spdl1	12
GO:2000816	BP	GO:2000816	negative regulation of mitotic sister chromatid separation	12/1654	50/23040	0.24	3.34317	4.61268	0.000168384	0.0164544	0.0144844	Ttk/Cenpe/Cdc20/Fbxo5/Cdca8/Ccnb1/Nuf2/Plk1/Khdc3/Knl1/Aurkb/Spdl1	12
GO:0060441	BP	GO:0060441	epithelial tube branching involved in lung morphogenesis	9/1654	38/23040	0.236842	3.29918	3.94472	0.0012019	0.0455412	0.040089	Foxa1/Esrp2/Wnt2/Dlg5/Esrp1/Bmp4/Foxa2/Yap1/Tbx2	9
GO:0050919	BP	GO:0050919	negative chemotaxis	10/1654	43/23040	0.232558	3.2395	4.08776	0.000758934	0.0333848	0.0293879	Rtn4r/Slit1/Sema3f/Sema3d/Sema3e/Sema4g/Sema6a/Apoa1/Lrtm2/Pdgfa	10
GO:1902100	BP	GO:1902100	negative regulation of metaphase/anaphase transition of cell cycle	12/1654	52/23040	0.230769	3.21458	4.44609	0.000250432	0.0201674	0.0177529	Ttk/Cenpe/Cdc20/Fbxo5/Cdca8/Ccnb1/Nuf2/Plk1/Khdc3/Knl1/Aurkb/Spdl1	12
GO:1905819	BP	GO:1905819	negative regulation of chromosome separation	12/1654	52/23040	0.230769	3.21458	4.44609	0.000250432	0.0201674	0.0177529	Ttk/Cenpe/Cdc20/Fbxo5/Cdca8/Ccnb1/Nuf2/Plk1/Khdc3/Knl1/Aurkb/Spdl1	12
GO:0007094	BP	GO:0007094	mitotic spindle assembly checkpoint signaling	11/1654	48/23040	0.229167	3.19226	4.22824	0.00047929	0.0272413	0.0239799	Ttk/Cenpe/Cdc20/Cdca8/Ccnb1/Nuf2/Plk1/Khdc3/Knl1/Aurkb/Spdl1	11
GO:0071173	BP	GO:0071173	spindle assembly checkpoint signaling	11/1654	48/23040	0.229167	3.19226	4.22824	0.00047929	0.0272413	0.0239799	Ttk/Cenpe/Cdc20/Cdca8/Ccnb1/Nuf2/Plk1/Khdc3/Knl1/Aurkb/Spdl1	11
GO:0033047	BP	GO:0033047	regulation of mitotic sister chromatid segregation	13/1654	57/23040	0.22807	3.17699	4.57641	0.000158847	0.0164544	0.0144844	Ttk/Cenpe/Cdc20/Fbxo5/Cdca8/Ccnb1/Nuf2/Plk1/Cdk1/Khdc3/Knl1/Aurkb/Spdl1	13
GO:0008038	BP	GO:0008038	neuron recognition	11/1654	49/23040	0.22449	3.12711	4.14519	0.000578424	0.0290235	0.0255488	Nexn/Robo3/Sema5a/Nrcam/Ephb2/Ptprz1/Gap43/Bdnf/Prtg/Efnb3/Mypn	11
GO:0031672	CC	GO:0031672	A band	9/1659	40/22834	0.225	3.09684	3.71516	0.00192388	0.0316308	0.0276371	Atp2a1/Obscn/Myom1/Myl3/Ryr2/Hspb1/Klhl40/Ttn/Mybpc2	9
GO:0051985	BP	GO:0051985	negative regulation of chromosome segregation	12/1654	54/23040	0.222222	3.09553	4.28739	0.000364196	0.0238656	0.0210084	Ttk/Cenpe/Cdc20/Fbxo5/Cdca8/Ccnb1/Nuf2/Plk1/Khdc3/Knl1/Aurkb/Spdl1	12
GO:0010965	BP	GO:0010965	regulation of mitotic sister chromatid separation	13/1654	59/23040	0.220339	3.06929	4.42587	0.000229571	0.0193744	0.0170549	Ttk/Cenpe/Cdc20/Fbxo5/Cdca8/Ccnb1/Nuf2/Ube2c/Plk1/Khdc3/Knl1/Aurkb/Spdl1	13
GO:0008608	BP	GO:0008608	attachment of spindle microtubules to kinetochore	11/1654	50/23040	0.22	3.06457	4.06425	0.000694077	0.0324875	0.0285981	Sgo1/Cenpe/Ska1/Cdca8/Nek2/Ect2/Ccnb1/Nuf2/Knl1/Spag5/Aurkb	11
GO:0071174	BP	GO:0071174	mitotic spindle checkpoint signaling	11/1654	50/23040	0.22	3.06457	4.06425	0.000694077	0.0324875	0.0285981	Ttk/Cenpe/Cdc20/Cdca8/Ccnb1/Nuf2/Plk1/Khdc3/Knl1/Aurkb/Spdl1	11
GO:0031045	CC	GO:0031045	dense core granule	12/1659	54/22834	0.222222	3.0586	4.23922	0.000406166	0.0123448	0.0107862	Spx/Syt7/Aqp1/Calca/Stxbp5l/Bdnf/Slc6a9/Npy1r/Avp/Cacna2d1/Calcrl/Syt2	12
GO:0055008	BP	GO:0055008	cardiac muscle tissue morphogenesis	16/1654	73/23040	0.219178	3.05312	4.88606	4.85363874865416e-05	0.00819235	0.00721156	Pkp2/Ankrd1/Lrp2/Wnt2/Tnnc1/Tgfb2/Foxc1/Myl3/Myh6/Hey1/Ryr2/Epo/Tnnt2/Epor/Ttn/Actc1	16
GO:0051784	BP	GO:0051784	negative regulation of nuclear division	15/1654	69/23040	0.217391	3.02823	4.69231	9.14983410154716e-05	0.0121344	0.0106817	Ttk/Cenpe/Cdc20/Fbxo5/Cdca8/Nme6/Ccnb1/Bmp4/Nuf2/Plk1/Khdc3/Knl1/Fgfr3/Aurkb/Spdl1	15
GO:0044298	CC	GO:0044298	cell body membrane	9/1659	41/22834	0.219512	3.0213	3.6259	0.00230851	0.035846	0.0313201	Kcnd2/Aqp1/Kcnc2/Slc6a2/Flrt1/Adcy8/Gria1/Dab2ip/Atp1b2	9
GO:0055010	BP	GO:0055010	ventricular cardiac muscle tissue morphogenesis	12/1654	56/23040	0.214286	2.98497	4.1359	0.000518852	0.0279792	0.0246295	Pkp2/Lrp2/Tnnc1/Tgfb2/Foxc1/Myl3/Myh6/Hey1/Ryr2/Epo/Tnnt2/Epor	12
GO:0051306	BP	GO:0051306	mitotic sister chromatid separation	13/1654	62/23040	0.209677	2.92078	4.21165	0.00038531	0.0241298	0.021241	Ttk/Cenpe/Cdc20/Fbxo5/Cdca8/Ccnb1/Nuf2/Ube2c/Plk1/Khdc3/Knl1/Aurkb/Spdl1	13
GO:0060415	BP	GO:0060415	muscle tissue morphogenesis	18/1654	87/23040	0.206897	2.88204	4.89107	3.8147207022821e-05	0.00758857	0.00668006	Efemp2/Pkp2/Ankrd1/Lrp2/Wnt2/Tnnc1/Tgfb2/Foxc1/Myl3/Myh6/Hey1/Ryr2/Epo/Tnnt2/Fzd2/Epor/Ttn/Actc1	18
GO:0006956	BP	GO:0006956	complement activation	13/1654	63/23040	0.206349	2.87442	4.14309	0.000454008	0.0266192	0.0234324	C9/Igha/Masp1/Vsig4/Cd55b/Krt1/Cfd/Cfi/Cfhr2/C8g/C4b/Cd5l/Hc	13
GO:0030239	BP	GO:0030239	myofibril assembly	16/1654	78/23040	0.205128	2.85741	4.56967	0.000112619	0.0135471	0.0119252	Edn1/Myom1/Mylk3/Nebl/Actn2/Ldb3/Fhod3/Myh6/Tmod4/Acta1/Lmod1/Tnnt2/Mypn/Ttn/Actc1/Mybpc2	16
GO:0031577	BP	GO:0031577	spindle checkpoint signaling	11/1654	54/23040	0.203704	2.83757	3.75961	0.00136557	0.0493121	0.0434084	Ttk/Cenpe/Cdc20/Cdca8/Ccnb1/Nuf2/Plk1/Khdc3/Knl1/Aurkb/Spdl1	11
GO:0055002	BP	GO:0055002	striated muscle cell development	16/1654	81/23040	0.197531	2.75158	4.39168	0.000179355	0.0172243	0.0151622	Edn1/Myom1/Mylk3/Nebl/Actn2/Ldb3/Fhod3/Myh6/Tmod4/Acta1/Lmod1/Tnnt2/Mypn/Ttn/Actc1/Mybpc2	16
GO:0016903	MF	GO:0016903	oxidoreductase activity, acting on the aldehyde or oxo group of donors	13/1651	65/22548	0.2	2.73144	3.92927	0.000749496	0.0381119	0.0349896	Aldh5a1/Aldh1l1/Aldh1a3/Akr1c14/Akr1c12/Aox1/Aldh3b2/Aox2/Akr1b8/Akr1b7/Aldh8a1/Akr1cl/Aldh3a1	13
GO:0048709	BP	GO:0048709	oligodendrocyte differentiation	24/1654	123/23040	0.195122	2.71802	5.31297	6.13040267316754e-06	0.00200861	0.00176814	Nkx2-1/Daam2/Il33/Erbb2/Sox5/Il34/Wasf3/Cntn1/Clcn2/Gpm6b/Cntnap1/Ptprz1/Tenm4/Sox6/Ntrk2/Vtn/Pparg/Bmp4/Mal/Myrf/Tppp/Hes5/Aspa/Fgfr3	24
GO:0051965	BP	GO:0051965	positive regulation of synapse assembly	16/1654	82/23040	0.195122	2.71802	4.33415	0.000208186	0.018638	0.0164066	Lrrtm2/Flrt2/Amigo2/Ephb2/Ntrk2/Flrt1/Asic2/Dlg5/Lrrc24/Lrtm2/Dlg4/Cux2/Bdnf/Prkca/Amigo3/Lrrtm3	16
GO:1905818	BP	GO:1905818	regulation of chromosome separation	14/1654	72/23040	0.194444	2.70859	4.03809	0.000527436	0.0279792	0.0246295	Ttk/Cenpe/Cdc20/Fbxo5/Cdca8/Ccnb1/Nuf2/Ube2c/Plk1/Khdc3/Knl1/Aurkb/Spdl1/Ncapg	14
GO:0003229	BP	GO:0003229	ventricular cardiac muscle tissue development	13/1654	68/23040	0.191176	2.66306	3.81943	0.000973499	0.0386585	0.0340303	Pkp2/Lrp2/Tnnc1/Tgfb2/Foxc1/Myl3/Myh6/Hey1/Ryr2/Epo/Tnnt2/Epor/Tbx3	13
GO:0009880	BP	GO:0009880	embryonic pattern specification	16/1654	84/23040	0.190476	2.65331	4.22163	0.000278096	0.0203815	0.0179414	Ripply3/Pld6/Sema3f/Bmp4/Chrdl1/Lhx1/Erbb4/Ihh/Smad6/Cobl/Foxa2/Meis1/Tbx6/Tcf7l1/Tbx3/Satb2	16
GO:0048644	BP	GO:0048644	muscle organ morphogenesis	18/1654	95/23040	0.189474	2.63934	4.45269	0.000127342	0.0144754	0.0127424	Efemp2/Pkp2/Ankrd1/Lrp2/Wnt2/Tnnc1/Tgfb2/Foxc1/Myl3/Myh6/Hey1/Ryr2/Epo/Tnnt2/Fzd2/Epor/Ttn/Actc1	18
GO:0032835	BP	GO:0032835	glomerulus development	13/1654	70/23040	0.185714	2.58698	3.69806	0.00128884	0.0478588	0.0421291	Edn1/Ednrb/Ifng/Aqp1/Adipoq/Osr1/Notch3/Foxc1/Bmp4/Serpinb7/C3ar1/Hc/Col4a3	13
GO:0032414	BP	GO:0032414	positive regulation of ion transmembrane transporter activity	15/1654	81/23040	0.185185	2.5796	3.96049	0.000583215	0.0290235	0.0255488	Akap6/Edn1/Fgf14/Stac3/Ephb2/Actn2/Stac/Scn1b/Ryr2/Wnk2/Plcb1/Arc/Trpc6/Atp1b2/Hap1	15
GO:0008083	MF	GO:0008083	growth factor activity	28/1651	149/22548	0.187919	2.56645	5.39226	3.40032114469223e-06	0.000864532	0.000793707	Fgf16/Pgf/Il34/Fgf14/Ntf3/Fgf23/Lefty1/Fgf8/Fgf18/Bmp6/Ccn3/Hbegf/Jag2/Tgfb2/Bmp8a/Ccn2/Timp1/Csf2/Bmp4/Amelx/Bmp3/Kitl/Fgf17/Bdnf/Pdgfa/Tgfa/Manf/Efemp1	28
GO:0032411	BP	GO:0032411	positive regulation of transporter activity	16/1654	87/23040	0.183908	2.56181	4.05886	0.000420698	0.0254705	0.0224212	Akap6/Edn1/Fgf14/Stac3/Ephb2/Adipoq/Actn2/Stac/Scn1b/Ryr2/Wnk2/Plcb1/Arc/Trpc6/Atp1b2/Hap1	16
GO:0001750	CC	GO:0001750	photoreceptor outer segment	16/1659	86/22834	0.186047	2.56069	4.0587	0.000419592	0.0123448	0.0107862	Map1b/Sptbn5/Gucy2f/Map1a/Gnat3/Pcdhb16/Guca1b/Ush1c/Rp1/Crb1/Cngb3/Prkca/Opn1sw/Gnat1/Rab27a/Pde6g	16
GO:0034703	CC	GO:0034703	cation channel complex	37/1659	199/22834	0.18593	2.55908	6.18299	1.07001462388805e-07	4.35921322385197e-05	3.80882202404164e-05	Akap6/Trpc3/Grik2/Stac3/Dpp10/Kcnd2/Trpc5/Trpc1/Catsper2/Kcnc2/Cachd1/Kcnk1/Kcnh1/Abcc8/Kcnk4/Kcnd1/Dpp6/Kcns1/Cacna1c/Scn1b/Scnn1b/Cacna2d4/Dlg4/Kcnq4/Cngb3/Ryr2/Scn8a/Scn4b/Trpc6/Kcnj3/Kcnq1/Kcnab3/Cacna2d1/Cacna1b/Pkd1l1/Kcnh2/Cacng6	37
GO:0043198	CC	GO:0043198	dendritic shaft	13/1659	70/22834	0.185714	2.55612	3.64973	0.0014366	0.0299428	0.0261623	Grm5/Rtn4r/Rgs7bp/Map1a/Syngap1/Map2/Slc1a2/Grip1/Zfp804a/Cacna1c/Gria1/Hspa8/Cacna1b	13
GO:0051304	BP	GO:0051304	chromosome separation	15/1654	82/23040	0.182927	2.54815	3.90559	0.000667177	0.0317622	0.0279596	Ttk/Cenpe/Cdc20/Fbxo5/Cdca8/Ccnb1/Nuf2/Ube2c/Espl1/Plk1/Khdc3/Knl1/Aurkb/Spdl1/Ncapg	15
GO:0098839	CC	GO:0098839	postsynaptic density membrane	21/1659	114/22834	0.184211	2.53542	4.60011	6.62724115612639e-05	0.00411625	0.00359654	Lrfn2/Lrrtm2/Grm5/Rgs7bp/Grik2/Nrcam/Ptprf/Ptprz1/Actn2/Lrfn4/Shisa6/Dgki/Erbb4/Gria1/Dlg4/Hspb1/Arc/Scn8a/Lrfn3/Efnb3/Lrrtm3	21
GO:0007156	BP	GO:0007156	homophilic cell adhesion via plasma membrane adhesion molecules	20/1654	110/23040	0.181818	2.5327	4.48113	0.00010039	0.0127084	0.011187	Cdh2/Nexn/Pcdh1/Pcdh12/Cdh6/Nrcam/Amigo2/Pcdh18/Palld/Cdh13/Ptprf/Pcdh20/Cdhr3/Igsf9b/Cdh17/Cdh3/Sdk2/Sdk1/Prtg/Mypn	20
GO:0008543	BP	GO:0008543	fibroblast growth factor receptor signaling pathway	15/1654	83/23040	0.180723	2.51745	3.8515	0.000761197	0.0333848	0.0293879	Fgf16/Flrt2/Rhod/Fgf23/Fgf8/Fgf18/Fgfrl1/Ccn2/Flrt1/Fgf17/Lrit3/Fgfr3/Gata3/Tbx2/Fgfbp1	15
GO:0055013	BP	GO:0055013	cardiac muscle cell development	20/1654	111/23040	0.18018	2.50989	4.43453	0.000114311	0.0135471	0.0119252	Akap6/Myh11/Edn1/Prickle1/Mylk3/Nebl/Sgcd/Actn2/Myo18b/Fhod3/Asb2/Myh6/Bmp4/Ppara/Meis1/Myocd/Trip10/Tbx3/Ttn/Actc1	20
GO:0005249	MF	GO:0005249	voltage-gated potassium channel activity	18/1651	98/22548	0.183673	2.50846	4.20644	0.000244726	0.0170842	0.0156846	Kcnj1/Kcnj15/Kcnd2/Kcnc2/Kcnk1/Kcnh1/Kcnk4/Kcnd1/Kcnn3/Kcns1/Kcnk7/Kcnq4/Kcnt2/Kcnj14/Kcnj3/Kcnq1/Kcnab3/Kcnh2	18
GO:0034767	BP	GO:0034767	positive regulation of monoatomic ion transmembrane transport	30/1654	168/23040	0.178571	2.48748	5.3813	3.09009271044398e-06	0.0012578	0.00110721	Akap6/Edn1/Ifng/Trpc3/Fgf14/Stac3/Prss8/Ephb2/Trpc1/Kcnc2/Actn2/Npsr1/Dpp6/Stac/Cxcl10/Bmp4/Cacna1c/Scn1b/Cxcr3/Ryr2/Wnk2/Plcb1/Arc/Cd4/Trpc6/Atp1b2/Kcnq1/Hap1/Kcnh2/Lcn2	30
GO:0030017	CC	GO:0030017	sarcomere	37/1659	205/22834	0.180488	2.48418	5.97482	2.33947042424972e-07	4.35921322385197e-05	3.80882202404164e-05	Nexn/Atp2a1/Obscn/Ankrd1/Pdlim3/Synm/Myom1/Palld/Trpc1/Nebl/Actn2/Tnnc1/Myo18b/Ldb3/Fhod3/Fhl5/Prickle4/Asb2/Myl3/Myh6/Cacna1c/Tmod4/Ryr2/Acta1/Hspb1/Scn8a/Timp4/Des/Myzap/Tpm2/Lmod1/Tnnt2/Mypn/Klhl40/Ttn/Actc1/Mybpc2	37
GO:0099094	MF	GO:0099094	ligand-gated monoatomic cation channel activity	22/1651	121/22548	0.181818	2.48312	4.59791	6.18718812679093e-05	0.0089891	0.00825269	Kcnj1/Asic5/Chrna2/Trpc3/Grik2/Kcnj15/Aqp1/Catsper2/Kcnk1/Asic2/Kcnn3/Scnn1b/Cngb3/Ryr2/Kcnt2/Ano1/Kcnj14/Kcnj3/Trpm8/Asic4/Kcnh2/Asic3	22
GO:0007088	BP	GO:0007088	regulation of mitotic nuclear division	21/1654	118/23040	0.177966	2.47904	4.47951	9.37864326938095e-05	0.0121486	0.0106942	Edn1/Ttk/Fgf8/Cenpe/Cdc20/Fbxo5/Cdca8/Nme6/L3mbtl1/Ccnb1/Bmp4/Nuf2/Ube2c/Cdca2/Plk1/Khdc3/Tgfa/Knl1/Fgfr3/Aurkb/Spdl1	21
GO:1904064	BP	GO:1904064	positive regulation of cation transmembrane transport	27/1654	152/23040	0.177632	2.47438	5.07181	1.04395218477976e-05	0.00323045	0.0028437	Akap6/Edn1/Ifng/Trpc3/Fgf14/Stac3/Prss8/Trpc1/Kcnc2/Actn2/Npsr1/Dpp6/Stac/Cxcl10/Bmp4/Cacna1c/Scn1b/Cxcr3/Ryr2/Wnk2/Plcb1/Cd4/Atp1b2/Kcnq1/Hap1/Kcnh2/Lcn2	27
GO:1902893	BP	GO:1902893	regulation of miRNA transcription	14/1654	79/23040	0.177215	2.46858	3.63623	0.00137224	0.0493121	0.0434084	Myc/Atoh8/Nr2f1/Tgfb2/Gata6/Notch3/Pparg/Bmp4/Nfatc4/Ppara/Tert/Smad6/Myocd/Gata3	14
GO:0045132	BP	GO:0045132	meiotic chromosome segregation	18/1654	102/23040	0.176471	2.45821	4.10466	0.00032169	0.0218514	0.0192353	Sgo1/Mcmdc2/Mnd1/Ttk/Cenpe/Psmc3ip/Fbxo5/Morc2b/Shoc1/Nuf2/Espl1/Plk1/Brip1/Fmn2/Stag3/Fancd2/Knl1/Ccne2	18
GO:0042490	BP	GO:0042490	mechanoreceptor differentiation	17/1654	97/23040	0.175258	2.44132	3.95599	0.000506525	0.0276603	0.0243488	Atp8b1/Gfi1/Gsdme/Ntf3/Tmc1/Jag2/Ntrk2/Ush1c/Esrp1/Bmp4/Hey1/Bdnf/Hes5/Kcnq1/Fgfr3/Fzd2/Tsku	17
GO:0055006	BP	GO:0055006	cardiac cell development	21/1654	120/23040	0.175	2.43773	4.39131	0.000120261	0.0139553	0.0122845	Akap6/Myh11/Edn1/Prickle1/Mylk3/Nebl/Sgcd/Actn2/Myo18b/Fhod3/Asb2/Myh6/Bmp4/Ppara/Smad6/Meis1/Myocd/Trip10/Tbx3/Ttn/Actc1	21
GO:0034705	CC	GO:0034705	potassium channel complex	17/1659	96/22834	0.177083	2.43732	3.95009	0.000512786	0.0130294	0.0113843	Grik2/Dpp10/Kcnd2/Kcnc2/Kcnk1/Kcnh1/Abcc8/Kcnk4/Kcnd1/Dpp6/Kcns1/Dlg4/Kcnq4/Kcnj3/Kcnq1/Kcnab3/Kcnh2	17
GO:0031674	CC	GO:0031674	I band	26/1659	147/22834	0.176871	2.4344	4.88352	2.00912954594603e-05	0.00140388	0.00122663	Nexn/Atp2a1/Obscn/Ankrd1/Pdlim3/Synm/Palld/Nebl/Actn2/Myo18b/Ldb3/Fhl5/Prickle4/Asb2/Myl3/Myh6/Cacna1c/Ryr2/Hspb1/Scn8a/Des/Myzap/Mypn/Klhl40/Ttn/Actc1	26
GO:0034704	CC	GO:0034704	calcium channel complex	12/1659	68/22834	0.176471	2.42889	3.30296	0.00336397	0.0482169	0.0421291	Akap6/Stac3/Trpc5/Catsper2/Cachd1/Cacna1c/Cacna2d4/Ryr2/Cacna2d1/Cacna1b/Pkd1l1/Cacng6	12
GO:0030198	BP	GO:0030198	extracellular matrix organization	57/1654	327/23040	0.174312	2.42814	7.23341	3.61852351992329e-10	8.53470491996916e-07	7.51292743403881e-07	Myh11/Has2/Efemp2/Gfod2/Scara3/Flrt2/Ntn4/Loxl2/Fbln5/Sema5a/Loxl4/Mansc4/Hpse2/Col4a6/Prickle1/Col4a5/Adamts5/Vit/Tnfrsf11b/Smoc1/Gpm6b/Cpb2/Mmp19/Col19a1/Tgfb2/Thsd4/Adamts14/Col7a1/Vtn/Adamts2/Ccn2/Foxc1/Pparg/Adtrp/Col24a1/Mmp16/Ddr2/Olfml2b/Crispld2/Cma1/Mmp8/Mmp27/Mmp23/Eln/Vwa1/Axin2/Mmp12/Ihh/Adamts12/Mmp17/Mmp21/Emilin1/Has1/Elf3/Aebp1/Col4a3/Serpinh1	57
GO:0045229	BP	GO:0045229	external encapsulating structure organization	57/1654	328/23040	0.17378	2.42074	7.20706	4.07973227881214e-10	8.53470491996916e-07	7.51292743403881e-07	Myh11/Has2/Efemp2/Gfod2/Scara3/Flrt2/Ntn4/Loxl2/Fbln5/Sema5a/Loxl4/Mansc4/Hpse2/Col4a6/Prickle1/Col4a5/Adamts5/Vit/Tnfrsf11b/Smoc1/Gpm6b/Cpb2/Mmp19/Col19a1/Tgfb2/Thsd4/Adamts14/Col7a1/Vtn/Adamts2/Ccn2/Foxc1/Pparg/Adtrp/Col24a1/Mmp16/Ddr2/Olfml2b/Crispld2/Cma1/Mmp8/Mmp27/Mmp23/Eln/Vwa1/Axin2/Mmp12/Ihh/Adamts12/Mmp17/Mmp21/Emilin1/Has1/Elf3/Aebp1/Col4a3/Serpinh1	57
GO:0043062	BP	GO:0043062	extracellular structure organization	57/1654	329/23040	0.173252	2.41338	7.18082	4.59678900536939e-10	8.53470491996916e-07	7.51292743403881e-07	Myh11/Has2/Efemp2/Gfod2/Scara3/Flrt2/Ntn4/Loxl2/Fbln5/Sema5a/Loxl4/Mansc4/Hpse2/Col4a6/Prickle1/Col4a5/Adamts5/Vit/Tnfrsf11b/Smoc1/Gpm6b/Cpb2/Mmp19/Col19a1/Tgfb2/Thsd4/Adamts14/Col7a1/Vtn/Adamts2/Ccn2/Foxc1/Pparg/Adtrp/Col24a1/Mmp16/Ddr2/Olfml2b/Crispld2/Cma1/Mmp8/Mmp27/Mmp23/Eln/Vwa1/Axin2/Mmp12/Ihh/Adamts12/Mmp17/Mmp21/Emilin1/Has1/Elf3/Aebp1/Col4a3/Serpinh1	57
GO:0003151	BP	GO:0003151	outflow tract morphogenesis	15/1654	88/23040	0.170455	2.37441	3.59238	0.00141735	0.0497877	0.0438271	Edn1/Lrp2/Prickle1/Fgf8/Tgfb2/Gata6/Foxc1/Bmp4/Hey1/Eln/Npy1r/Smad6/Fzd2/Tbx2/Tbx3	15
GO:0007091	BP	GO:0007091	metaphase/anaphase transition of mitotic cell cycle	16/1654	94/23040	0.170213	2.37104	3.70421	0.0010144	0.0397901	0.0350264	Ttk/Cdc6/Cenpe/Cdc20/Fbxo5/Cdca8/Smarcd3/Ccnb1/Nuf2/Ube2c/Plk1/Khdc3/Knl1/Cit/Aurkb/Spdl1	16
GO:0043292	CC	GO:0043292	contractile fiber	42/1659	245/22834	0.171429	2.35949	5.98832	1.63700297281641e-07	4.35921322385197e-05	3.80882202404164e-05	Myh11/Nexn/Atp2a1/Obscn/Acta2/Ankrd1/Pdlim3/Synm/Myom1/Palld/Trpc1/Ablim2/Nebl/Ido1/Actn2/Tnnc1/Myo18b/Ldb3/Fhod3/Fhl5/Prickle4/Asb2/Myl3/Myh6/Cacna1c/Tmod4/Ryr2/Acta1/Hspb1/Scn8a/Timp4/Des/Myzap/Tpm2/Lmod1/Tnnt2/Mypn/Myh7b/Klhl40/Ttn/Actc1/Mybpc2	42
GO:0032963	BP	GO:0032963	collagen metabolic process	21/1654	124/23040	0.169355	2.35909	4.22012	0.000193716	0.0178433	0.0157071	Ltbp1/Mmp19/Adamts2/Ccn2/Pparg/Mmp16/Bmp4/Ddr2/Arg1/Serpinb7/Mmp8/Mmp27/Mmp23/Mmp12/Ihh/Mmp17/Mmp21/Prtn3/Emilin1/Fgfr3/Serpinh1	21
GO:0005267	MF	GO:0005267	potassium channel activity	21/1651	122/22548	0.172131	2.35083	4.20513	0.000200864	0.0157137	0.0144264	Kcnj1/Grik2/Kcnj15/Kcnd2/Aqp1/Kcnc2/Kcnk1/Kcnh1/Abcc8/Kcnk4/Kcnd1/Kcnn3/Kcns1/Kcnk7/Kcnq4/Kcnt2/Kcnj14/Kcnj3/Kcnq1/Kcnab3/Kcnh2	21
GO:0008076	CC	GO:0008076	voltage-gated potassium channel complex	14/1659	82/22834	0.170732	2.3499	3.42762	0.00221664	0.0354029	0.030933	Dpp10/Kcnd2/Kcnc2/Kcnk1/Kcnh1/Kcnd1/Dpp6/Kcns1/Dlg4/Kcnq4/Kcnj3/Kcnq1/Kcnab3/Kcnh2	14
GO:0044304	CC	GO:0044304	main axon	15/1659	88/22834	0.170455	2.34609	3.54124	0.00159596	0.0299428	0.0261623	Map1b/Pnmt/Nrcam/Map1a/Cntnap1/Kcnc2/Spock1/Kcnh1/Pard3/Map2/Slc1a2/Scn1b/Dlg4/Bcan/Scn8a	15
GO:0070252	BP	GO:0070252	actin-mediated cell contraction	17/1654	102/23040	0.166667	2.32164	3.72025	0.000915671	0.0383488	0.0337576	Akap6/Pkp2/Acta2/Sgcd/Tnnc1/Pard3/Myh6/Cacna1c/Scn1b/Ryr2/Scn4b/Tnnt2/Kcnq1/Myh7b/Cacna2d1/Kcnh2/Actc1	17
GO:0030016	CC	GO:0030016	myofibril	39/1659	232/22834	0.168103	2.31373	5.62949	7.46951983383841e-07	0.000104387	9.12067684973954e-05	Nexn/Atp2a1/Obscn/Ankrd1/Pdlim3/Synm/Myom1/Palld/Trpc1/Ablim2/Nebl/Actn2/Tnnc1/Myo18b/Ldb3/Fhod3/Fhl5/Prickle4/Asb2/Myl3/Myh6/Cacna1c/Tmod4/Ryr2/Acta1/Hspb1/Scn8a/Timp4/Des/Myzap/Tpm2/Lmod1/Tnnt2/Mypn/Myh7b/Klhl40/Ttn/Actc1/Mybpc2	39
GO:0098742	BP	GO:0098742	cell-cell adhesion via plasma-membrane adhesion molecules	35/1654	212/23040	0.165094	2.29974	5.2872	3.1614237156402e-06	0.0012578	0.00110721	Cdh2/Nexn/Tenm1/Pcdh1/Pcdh12/Cdh6/Nrcam/Amigo2/Pcdh18/Palld/Cdh13/Fgfrl1/Adipoq/Ptprf/Tenm4/Tgfb2/Pcdh20/Lrfn4/Pcdhb16/Apoa1/Ajuba/Mpz/Cdhr3/Crb1/Cldn3/Igsf9b/Cdh17/Cdh3/Sdk2/Sdk1/Prtg/Amigo3/Lrfn3/Crtam/Mypn	35
GO:0044784	BP	GO:0044784	metaphase/anaphase transition of cell cycle	16/1654	97/23040	0.164948	2.29771	3.56183	0.00143117	0.0497877	0.0438271	Ttk/Cdc6/Cenpe/Cdc20/Fbxo5/Cdca8/Smarcd3/Ccnb1/Nuf2/Ube2c/Plk1/Khdc3/Knl1/Cit/Aurkb/Spdl1	16
GO:0045666	BP	GO:0045666	positive regulation of neuron differentiation	19/1654	116/23040	0.163793	2.28162	3.84837	0.000588808	0.0290235	0.0255488	Foxa1/Map1b/Ifng/Sh3gl3/Bmp6/Trpc5/Rgs6/Ect2/Bmp4/Adra2b/Bdnf/Ccr5/Brinp3/Foxa2/Gprc5b/Trpc6/Epo/Lin28a/Mmd	19
GO:0022843	MF	GO:0022843	voltage-gated monoatomic cation channel activity	24/1651	144/22548	0.166667	2.2762	4.31829	0.000123006	0.012698	0.0116577	Kcnj1/Kcnj15/Tmc1/Kcnd2/Kcnc2/Cachd1/Kcnk1/Kcnh1/Kcnk4/Kcnd1/Kcnn3/Kcns1/Kcnk7/Cacna1c/Cacna2d4/Kcnq4/Kcnt2/Kcnj14/Kcnj3/Kcnq1/Kcnab3/Cacna2d1/Cacna1b/Kcnh2	24
GO:0005201	MF	GO:0005201	extracellular matrix structural constituent	24/1651	145/22548	0.165517	2.2605	4.28005	0.000137343	0.012698	0.0116577	Efemp2/Scara3/Creld2/Fbln2/Fbln5/Col4a6/Col4a5/Ltbp1/Adipoq/Vcan/Col19a1/Col7a1/Mmrn1/Vtn/Col24a1/Amelx/Ecm1/Eln/Vwa1/Muc2/Creld1/Emilin1/Efemp1/Col4a3	24
GO:0033045	BP	GO:0033045	regulation of sister chromatid segregation	17/1654	105/23040	0.161905	2.25531	3.58535	0.00127614	0.0477054	0.0419941	Ttk/Cdc6/Cenpe/Cdc20/Fbxo5/Cdca8/Smarcd3/Ccnb1/Nuf2/Ube2c/Plk1/Cdk1/Khdc3/Knl1/Cit/Aurkb/Spdl1	17
GO:0048738	BP	GO:0048738	cardiac muscle tissue development	45/1654	279/23040	0.16129	2.24675	5.82669	2.63219508107571e-07	0.000293227	0.000258121	Akap6/Myh11/Edn1/Pkp2/Ankrd1/Mapk11/Lrp2/Prickle1/Fgf8/Wnt2/Mylk3/Nebl/Tenm4/Sgcd/Actn2/Tnnc1/Cacybp/Tgfb2/Myo18b/Sox6/Gata6/Fhod3/Foxc1/Asb2/Myl3/Ccnb1/Myh6/Bmp4/Erbb4/Hey1/Ppara/Cdk1/Ryr2/Meis1/Yap1/Myocd/Epo/Tnnt2/Trip10/Gjc1/Tbx2/Epor/Tbx3/Ttn/Actc1	45
GO:0006939	BP	GO:0006939	smooth muscle contraction	19/1654	118/23040	0.161017	2.24294	3.76445	0.000730848	0.0333848	0.0293879	Myh11/Edn1/Spx/Ednrb/Acta2/Gucy1a1/Arhgap42/Abat/Calca/Adra2b/Cacna1c/Scnn1b/Tshz3/Tbxa2r/Npy1r/Myocd/Tbx2/Tbx3/Calcrl	19
GO:0090288	BP	GO:0090288	negative regulation of cellular response to growth factor stimulus	17/1654	106/23040	0.160377	2.23404	3.5414	0.00142027	0.0497877	0.0438271	Lrp2/Fgfrl1/Ptprf/Cnmd/Adgra2/Sema6a/Skor1/Pparg/Chrdl1/Fstl3/Dand5/Adamts12/Dab2ip/Smad6/Tnfaip6/Emilin1/Gata3	17
GO:0097485	BP	GO:0097485	neuron projection guidance	41/1654	256/23040	0.160156	2.23096	5.50785	1.06307665524276e-06	0.000700351	0.000616504	Edn1/Nkx2-1/Nexn/Pcdhac2/Flrt2/Erbb2/Rtn4r/Ntn4/Robo3/Slit1/Sema5a/Etv1/Sema3f/Cntn1/Lrp2/Ntf3/Nrcam/Fgf8/Ephb2/Sema3d/Sema3e/Gfra3/Tgfb2/Kalrn/Sema4g/Sema6a/Pla2g10/Notch3/Gap43/Lhx1/Scn1b/Lrtm2/Bdnf/Prtg/Lhx2/Plxna1/Tbr1/Efnb3/Mypn/Gata3/Lhx3	41
GO:0014706	BP	GO:0014706	striated muscle tissue development	48/1654	300/23040	0.16	2.22878	5.95763	1.36541796317722e-07	0.000190134	0.000167371	Akap6/Myh11/Edn1/Pkp2/Ankrd1/Mapk11/Lrp2/Prickle1/Fgf8/Wnt2/Mylk3/Nebl/Tenm4/Sgcd/Actn2/Tnnc1/Cacybp/Tgfb2/Myo18b/Sox6/Cenpf/Gata6/Fhod3/Foxc1/Asb2/Myl3/Ccnb1/Myh6/Bmp4/Erbb4/Hey1/Ppara/Cdk1/Ryr2/Bdnf/Meis1/Yap1/Myocd/Epo/Sox15/Tnnt2/Trip10/Gjc1/Tbx2/Epor/Tbx3/Ttn/Actc1	48
GO:0050768	BP	GO:0050768	negative regulation of neurogenesis	28/1654	175/23040	0.16	2.22878	4.53776	5.24207289707859e-05	0.00834238	0.00734363	Daam2/Rtn4r/Slit1/Sema5a/Sema3f/Ephb2/Trpc5/Syngap1/Sema3d/Sema3e/Sema4g/Sema6a/Abcc8/Bmp4/Map2/Nfatc4/Bdnf/Ccr5/Tert/Prtg/Hes5/Lhx2/Trpc6/Ascl2/Fgfr3/Cit/Efnb3/Lin28a	28
GO:0060419	BP	GO:0060419	heart growth	20/1654	125/23040	0.16	2.22878	3.83092	0.000583673	0.0290235	0.0255488	Akap6/Edn1/Mapk11/Dusp6/Wnt2/Tenm4/Tgfb2/Gata6/Foxc1/Ccnb1/Myh6/Erbb4/Ppara/Cdk1/Meis1/Yap1/Myocd/Trip10/Tbx2/Ttn	20
GO:0051963	BP	GO:0051963	regulation of synapse assembly	23/1654	144/23040	0.159722	2.22491	4.10053	0.000241633	0.020088	0.0176831	Lrrtm2/Ptpn13/Flrt2/Amigo2/Ephb2/Ntrk2/Lrfn4/Lhfpl4/Flrt1/Asic2/Dlg5/Lrrc24/Lrtm2/Dlg4/Cux2/Bdnf/Prkca/Amigo3/Icam5/Lrfn3/Efnb3/Lrrtm3/Srcin1	23
GO:0051961	BP	GO:0051961	negative regulation of nervous system development	29/1654	183/23040	0.15847	2.20747	4.56064	4.65527020022489e-05	0.00810308	0.00713298	Daam2/Ptpn13/Rtn4r/Slit1/Sema5a/Sema3f/Ephb2/Trpc5/Syngap1/Sema3d/Sema3e/Sema4g/Sema6a/Abcc8/Bmp4/Map2/Nfatc4/Bdnf/Ccr5/Tert/Prtg/Hes5/Lhx2/Trpc6/Ascl2/Fgfr3/Cit/Efnb3/Lin28a	29
GO:0043195	CC	GO:0043195	terminal bouton	15/1659	94/22834	0.159574	2.19634	3.25323	0.00310824	0.0457239	0.0399508	Pnmt/Ptprn2/Grik2/Cplx3/Slc18a1/Kcnc2/Calca/Ntrk2/Ghrh/Grip1/Cplx2/Bdnf/Opn1sw/Hspa8/Blvrb	15
GO:0007411	BP	GO:0007411	axon guidance	40/1654	255/23040	0.156863	2.18508	5.29209	2.44003326269387e-06	0.00113258	0.000996989	Edn1/Nkx2-1/Nexn/Pcdhac2/Flrt2/Erbb2/Rtn4r/Ntn4/Robo3/Slit1/Sema5a/Etv1/Sema3f/Cntn1/Lrp2/Ntf3/Nrcam/Fgf8/Ephb2/Sema3d/Sema3e/Gfra3/Tgfb2/Kalrn/Sema4g/Sema6a/Pla2g10/Notch3/Gap43/Lhx1/Scn1b/Lrtm2/Bdnf/Prtg/Lhx2/Tbr1/Efnb3/Mypn/Gata3/Lhx3	40
GO:0005261	MF	GO:0005261	monoatomic cation channel activity	51/1651	320/22548	0.159375	2.17661	5.95846	1.17714476960139e-07	0.000119716	0.000109908	Kcnj1/Asic5/Chrna2/Trpc3/Grik2/Kcnj15/Gpm6a/Tmc1/Kcnd2/Trpc5/Aqp1/Trpc1/Catsper2/Kcnc2/Cachd1/Kcnk1/Kcnh1/Abcc8/Kcnk4/Asic2/Kcnd1/Kcnn3/Kcns1/Kcnk7/Cacna1c/Scn1b/Scnn1b/Cacna2d4/Kcnq4/Cngb3/Ryr2/Kcnt2/Scn8a/Ano1/Kcnj14/Scn4b/Otop1/Trpc6/Kcnj3/Trpm8/Kcnq1/Calhm5/Kcnab3/Cacna2d1/Cacna1b/Pkd1l1/Slc4a11/Asic4/Kcnh2/Asic3/Cacng6	51
GO:0008217	BP	GO:0008217	regulation of blood pressure	35/1654	224/23040	0.15625	2.17654	4.92092	1.10579715904467e-05	0.00324173	0.00285363	Edn1/Pgf/Nkx2-1/Spx/Ednrb/Corin/Acta2/Gucy1a1/Arhgap42/Abat/Adipoq/Calca/Coro2b/Pparg/Asic2/Myh6/Adra2b/Cacna1c/Scnn1b/Mcpt4/Ppara/Adrb3/Tbxa2r/Npy1r/Agtr1b/Camk2n1/C3ar1/Emilin1/Kcnq1/Avp/Cacna1b/Manf/Klk1/Klk1b11/Rasl10b	35
GO:0045171	CC	GO:0045171	intercellular bridge	16/1659	102/22834	0.156863	2.15901	3.2837	0.00275306	0.0415936	0.036342	Chrna2/Cep55/Cdc6/Cenpe/Trim45/Acot12/Gpx2/Ska1/Cdca8/Cd34/Apc2/Opn1sw/Klhdc8b/Hsd3b2/Agbl5/Tubb1	16
GO:0010927	BP	GO:0010927	cellular component assembly involved in morphogenesis	22/1654	142/23040	0.15493	2.15815	3.84986	0.000503362	0.0276603	0.0243488	Edn1/Myom1/Cntn1/Mylk3/Cntnap1/Nebl/Tenm4/Actn2/Ldb3/Fhod3/Myh6/Tmod4/Acta1/Tppp/Ccdc136/Ihh/Lmod1/Tnnt2/Mypn/Ttn/Actc1/Mybpc2	22
GO:0007204	BP	GO:0007204	positive regulation of cytosolic calcium ion concentration	31/1654	201/23040	0.154229	2.14839	4.5476	4.43001768524345e-05	0.00810308	0.00713298	Edn1/Ednrb/Trpc3/Trpc5/Cd55b/Adcy5/Ghrh/Ccl28/Pth1r/Bmp4/Adcy8/Cacna1c/Cxcr3/Dlg4/Ryr2/Xcr1/Ccr5/Cxcr6/Tbxa2r/Agtr1b/Cd4/Cxcr1/C3ar1/Trpc6/Epo/Fpr1/Fzd2/Avp/Cacna2d1/Ackr2/Epor	31
GO:0099634	CC	GO:0099634	postsynaptic specialization membrane	24/1659	154/22834	0.155844	2.14499	3.99057	0.000312296	0.010269	0.00897248	Cdh2/Lrfn2/Lrrtm2/Grm5/Rgs7bp/Grik2/Nrcam/Kcnd2/Ptprf/Ptprz1/Actn2/Lrfn4/Shisa6/Dgki/Erbb4/Gria1/Dlg4/Hspb1/Arc/Scn8a/Hspa8/Lrfn3/Efnb3/Lrrtm3	24
GO:1902106	BP	GO:1902106	negative regulation of leukocyte differentiation	19/1654	124/23040	0.153226	2.13442	3.52248	0.00134657	0.049092	0.0432147	Myc/Ifng/Erbb2/Prdm16/Tnfrsf11b/Clec2d/Adipoq/Tnfsf18/Bmp4/Cdkn2a/Gpr68/Fstl3/Hspb1/Ihh/Clec4g/Pglyrp4/Tnfaip6/Ascl2/Foxj1	19
GO:0051783	BP	GO:0051783	regulation of nuclear division	23/1654	151/23040	0.152318	2.12177	3.84603	0.000486359	0.0273638	0.0240878	Edn1/Ttk/Fgf8/Cenpe/Cdc20/Fbxo5/Cdca8/Nme6/L3mbtl1/Ccnb1/Bmp4/Nuf2/Ube2c/Cdca2/Plk1/Plcb1/Khdc3/Tgfa/Knl1/Fgfr3/Aurkb/Gpr3/Spdl1	23
GO:0072006	BP	GO:0072006	nephron development	25/1654	165/23040	0.151515	2.11059	3.98152	0.000307506	0.0211458	0.0186142	Edn1/Pgf/Myc/Ednrb/Ifng/Fgf8/Aqp1/Adipoq/Osr1/Notch3/Foxc1/Wnt9b/Bmp4/Lhx1/Erbb4/Serpinb7/Hey1/Agtr1b/Aqp11/Hes5/C3ar1/Yap1/Gata3/Hc/Col4a3	25
GO:0003206	BP	GO:0003206	cardiac chamber morphogenesis	23/1654	152/23040	0.151316	2.10781	3.81081	0.0005349	0.0281075	0.0247425	Pkp2/Lrp2/Fgf8/Wnt2/Fgfrl1/Tnnc1/Tgfb2/Gata6/Foxc1/Smarcd3/Myl3/Myh6/Bmp4/Hey1/Ryr2/Smad6/Epo/Tnnt2/Gata3/Fzd2/Tbx2/Epor/Tbx3	23
GO:0006936	BP	GO:0006936	muscle contraction	49/1654	324/23040	0.151235	2.10668	5.57908	5.77686888282902e-07	0.000459674	0.000404641	Akap6/Myh11/Edn1/Pkp2/Spx/Ednrb/Atp2a1/Acta2/Gucy1a1/Synm/Myom1/Arhgap42/Stac3/Abat/Kcnd2/Sgcd/Actn2/Tnnc1/Calca/Ccn2/Myl3/Stac/Myh6/Adra2b/Cacna1c/Scn1b/Scnn1b/Tmod4/Ryr2/Tshz3/Prkca/Tbxa2r/Npy1r/Scn4b/Myocd/Tpm2/Lmod1/Tnnt2/Kcnq1/Tbx2/Myh7b/Pgam2/Cacna2d1/Tbx3/Calcrl/Ttn/Kcnh2/Actc1/Mybpc2	49
GO:0097730	CC	GO:0097730	non-motile cilium	26/1659	170/22834	0.152941	2.10504	4.04787	0.000243917	0.010269	0.00897248	Enkd1/Map1b/Dcdc2a/Arl13a/Sptbn5/Ano2/Gucy2f/Glis2/Map1a/Gnat3/Pcdhb16/Guca1b/Ush1c/D630045J12Rik/Rp1/Crb1/Cngb3/Prkca/Opn1sw/Gnat1/Dnaaf4/Rab27a/Pde6g/Erich3/Cfap69/Pkd1l1	26
GO:0000070	BP	GO:0000070	mitotic sister chromatid segregation	27/1654	180/23040	0.15	2.08948	4.08086	0.000213576	0.018638	0.0164066	Cenpi/Ttk/Prickle1/Cenpe/Cdc20/Fbxo5/Ska1/Map10/Cdca8/Nek2/Ccnb1/Nuf2/Ube2c/Hspa1b/Hspa1a/Espl1/Plk1/Cdk1/Uhrf1/Khdc3/Knl1/Kif14/Spag5/Cit/Aurkb/Spdl1/Ncapg	27
GO:0034764	BP	GO:0034764	positive regulation of transmembrane transport	36/1654	241/23040	0.149378	2.08081	4.69067	2.28491593211568e-05	0.00553347	0.004871	Akap6/Edn1/Ifng/Trpc3/Fgf14/Stac3/Prss8/Ephb2/Adipoq/Trpc1/Kcnc2/Actn2/Slc34a1/Npsr1/Dpp6/Stac/Cxcl10/Bmp4/Slc1a2/Cacna1c/Scn1b/Erbb4/Cxcr3/Ryr2/Tert/Wnk2/Plcb1/Arc/Cd4/Irs1/Trpc6/Atp1b2/Kcnq1/Hap1/Kcnh2/Lcn2	36
GO:0055001	BP	GO:0055001	muscle cell development	36/1654	241/23040	0.149378	2.08081	4.69067	2.28491593211568e-05	0.00553347	0.004871	Akap6/Myh11/Efemp2/Edn1/Myom1/Prickle1/Stac3/Mylk3/Cntnap1/Nebl/Sgcd/Actn2/Myo18b/Ldb3/Fhod3/Asb2/Myorg/Myh6/Bmp4/Nfatc4/Tmod4/Ppara/Acta1/Smad6/Meis1/Myocd/Lmod1/Tnnt2/Trip10/Uchl1/Mypn/Klhl40/Tbx3/Ttn/Actc1/Mybpc2	36
GO:0010977	BP	GO:0010977	negative regulation of neuron projection development	25/1654	168/23040	0.14881	2.0729	3.88146	0.000406417	0.0250142	0.0220195	Rtn4r/Gfi1/Slit1/Nr2f1/Sema5a/Cspg4/Sema3f/Ephb2/Syngap1/Sema3d/Sema3e/Ptprz1/Spock1/Crmp1/Sema4g/Sema6a/Map2/Ccr5/Fignl2/Amigo3/Tbx6/Efnb3/Rtn4rl2/Efemp1/Tsku	25
GO:0030018	CC	GO:0030018	Z disc	20/1659	133/22834	0.150376	2.06973	3.46315	0.00149231	0.0299428	0.0261623	Nexn/Obscn/Pdlim3/Synm/Palld/Nebl/Actn2/Myo18b/Ldb3/Fhl5/Prickle4/Asb2/Myh6/Cacna1c/Ryr2/Hspb1/Scn8a/Des/Mypn/Ttn	20
GO:0010721	BP	GO:0010721	negative regulation of cell development	48/1654	324/23040	0.148148	2.06368	5.36234	1.37108254941014e-06	0.000763693	0.000672263	Myc/Daam2/Ednrb/Ifng/Grb14/Erbb2/Rtn4r/Slit1/Sema5a/Sema3f/Prdm16/Tnfrsf11b/Ephb2/Trpc5/Syngap1/Clec2d/Adipoq/Sema3d/Sema3e/Tnfsf18/Sema4g/Sema6a/Abcc8/Bmp4/Map2/Cdkn2a/Nfatc4/Gpr68/Fstl3/Bdnf/Ccr5/Tert/Hspb1/Ihh/Clec4g/Prtg/Pglyrp4/Hes5/Lhx2/Tbx6/Tnfaip6/Trpc6/Ascl2/Fgfr3/Cit/Efnb3/Lin28a/Foxj1	48
GO:0009582	BP	GO:0009582	detection of abiotic stimulus	21/1654	142/23040	0.147887	2.06005	3.52376	0.00123201	0.0463669	0.0408158	Myc/Grik2/Sema5a/Gucy2f/Tmc1/Calca/Grm8/Guca1b/Kcnk4/Asic2/Cacna2d4/Crb1/Ano3/Opn1sw/Gnat1/Ano1/Otop1/Kcnq1/Pkd1l1/Ttn/Asic3	21
GO:0005244	MF	GO:0005244	voltage-gated monoatomic ion channel activity	26/1651	173/22548	0.150289	2.05252	3.90615	0.000363676	0.0217564	0.019974	Kcnj1/Kcnj15/Clcn2/Tmc1/Kcnd2/Kcnc2/Cachd1/Kcnk1/Kcnh1/Kcnk4/Kcnd1/Kcnn3/Kcns1/Kcnk7/Cacna1c/Cacna2d4/Kcnq4/Kcnt2/Ano1/Kcnj14/Kcnj3/Kcnq1/Kcnab3/Cacna2d1/Cacna1b/Kcnh2	26
GO:0009581	BP	GO:0009581	detection of external stimulus	21/1654	143/23040	0.146853	2.04564	3.48817	0.00134849	0.049092	0.0432147	Myc/Grik2/Sema5a/Gucy2f/Tmc1/Calca/Grm8/Guca1b/Kcnk4/Asic2/Cacna2d4/Crb1/Ano3/Opn1sw/Gnat1/Ano1/Otop1/Kcnq1/Pkd1l1/Ttn/Asic3	21
GO:0055007	BP	GO:0055007	cardiac muscle cell differentiation	23/1654	157/23040	0.146497	2.04068	3.6387	0.000846295	0.0359837	0.0316757	Akap6/Myh11/Edn1/Prickle1/Mylk3/Nebl/Sgcd/Actn2/Cacybp/Myo18b/Sox6/Gata6/Fhod3/Asb2/Myh6/Bmp4/Ppara/Meis1/Myocd/Trip10/Tbx3/Ttn/Actc1	23
GO:0072073	BP	GO:0072073	kidney epithelium development	23/1654	157/23040	0.146497	2.04068	3.6387	0.000846295	0.0359837	0.0316757	Edn1/Pgf/Myc/Ednrb/Fgf8/Aqp1/Adipoq/Vcan/Osr1/Foxc1/Wnt9b/Bmp4/Lhx1/Smad9/Hey1/Tshz3/Bdnf/Agtr1b/Aqp11/Smad6/Hes5/Yap1/Gata3	23
GO:0034702	CC	GO:0034702	monoatomic ion channel complex	49/1659	331/22834	0.148036	2.03753	5.32215	1.53399593168367e-06	0.000171501	0.000149847	Akap6/Kcnj1/Chrna2/Trpc3/Grik2/Kcnj15/Ano2/Stac3/Clcn2/Dpp10/Kcnd2/Trpc5/Trpc1/Catsper2/Kcnc2/Cachd1/Kcnk1/Shisa6/Kcnh1/Abcc8/Kcnk4/Kcnd1/Dpp6/Kcns1/Kcnk7/Cacna1c/Scn1b/Gria1/Scnn1b/Cacna2d4/Best3/Dlg4/Kcnq4/Cngb3/Ryr2/Scn8a/Ano1/Kcnj14/Scn4b/Trpc6/Kcnj3/Best2/Kcnq1/Kcnab3/Cacna2d1/Cacna1b/Pkd1l1/Kcnh2/Cacng6	49
GO:0022832	MF	GO:0022832	voltage-gated channel activity	26/1651	175/22548	0.148571	2.02907	3.84128	0.00043594	0.0246306	0.0226128	Kcnj1/Kcnj15/Clcn2/Tmc1/Kcnd2/Kcnc2/Cachd1/Kcnk1/Kcnh1/Kcnk4/Kcnd1/Kcnn3/Kcns1/Kcnk7/Cacna1c/Cacna2d4/Kcnq4/Kcnt2/Ano1/Kcnj14/Kcnj3/Kcnq1/Kcnab3/Cacna2d1/Cacna1b/Kcnh2	26
GO:0050731	BP	GO:0050731	positive regulation of peptidyl-tyrosine phosphorylation	26/1654	180/23040	0.144444	2.01209	3.79099	0.000502858	0.0276603	0.0243488	Plpp3/Ifng/Gfra1/Grm5/Il34/Cspg4/Cntn1/Ntf3/Fgf8/Bmp6/Adipoq/Ptprz1/Hbegf/Tnfsf18/Vtn/Csf2/Erbb4/Kitl/Tgfa/Cd4/Hes5/Gprc5b/Epo/Fgfr3/Srcin1/Hpx	26
GO:0035051	BP	GO:0035051	cardiocyte differentiation	28/1654	196/23040	0.142857	1.98998	3.87083	0.000375547	0.0240437	0.0211651	Akap6/Myh11/Edn1/Prickle1/Mylk3/Nebl/Tenm4/Sgcd/Actn2/Cacybp/Tgfb2/Myo18b/Sox6/Gata6/Fhod3/Asb2/Myh6/Bmp4/Ppara/Smad6/Meis1/Myocd/Trip10/Tbx2/Tbx3/Ttn/Actc1/Sox18	28
GO:0034765	BP	GO:0034765	regulation of monoatomic ion transmembrane transport	52/1654	365/23040	0.142466	1.98453	5.27274	1.68536279951133e-06	0.000853406	0.000751236	Akap6/Edn1/Tcaf2/Ifng/Kcnj1/Trpc3/Grm5/Fgf14/Kcnj15/Stac3/Dpp10/Prss8/Tmc1/Ephb2/Trpc1/Kcnc2/Actn2/Osr1/Tgfb2/Asic2/Npsr1/Dpp6/Kcns1/Stac/Cxcl10/Bmp4/Cacna1c/Scn1b/Cxcr3/Ryr2/Prkca/Wnk2/Slc6a9/Plcb1/Arc/Kcnj14/Cd4/Scn4b/Fxyd6/Trpc6/Epo/Kcnj3/Atp1b2/Fcrl5/Kcnq1/Kcnab3/Cacna2d1/Hap1/Kcnh2/Cacng6/Lcn2/Lime1	52
GO:0031345	BP	GO:0031345	negative regulation of cell projection organization	32/1654	225/23040	0.142222	1.98114	4.11287	0.000162508	0.0164544	0.0144844	Rtn4r/Gfi1/Slit1/Nr2f1/Sema5a/Cspg4/Sema3f/Ephb2/Trpc5/Syngap1/Sema3d/Sema3e/Ptprf/Ptprz1/Spock1/Crmp1/Sema4g/Sema6a/Kif24/Map2/Nfatc4/Ccr5/Fignl2/Amigo3/Tbx6/Yap1/Trpc6/Cit/Efnb3/Rtn4rl2/Efemp1/Tsku	32
GO:0043270	BP	GO:0043270	positive regulation of monoatomic ion transport	34/1654	240/23040	0.141667	1.9734	4.21564	0.000111538	0.0135471	0.0119252	Akap6/Edn1/Ifng/Trpc3/Fgf14/Cntn1/Stac3/Prss8/Ephb2/Trpc1/Cldn16/Kcnc2/Actn2/Abcc8/Npsr1/Dpp6/Stac/Cxcl10/Bmp4/Cacna1c/Scn1b/Cxcr3/Ryr2/Wnk2/Plcb1/Arc/Cd4/Scn4b/Trpc6/Atp1b2/Kcnq1/Hap1/Kcnh2/Lcn2	34
GO:0005912	CC	GO:0005912	adherens junction	22/1659	154/22834	0.142857	1.96624	3.36759	0.00176024	0.0307492	0.0268668	Cdh2/Pkp2/Pof1b/Pdlim3/Cdh6/Magi1/Cdh13/Lin7a/Jcad/Ldb3/Prickle4/Ccdc85c/Pard3/Dlg5/Ajuba/Shroom3/Crb1/Lmo7/Cdh17/Cdh3/Ccdc85a/Vinac1	22
GO:0042734	CC	GO:0042734	presynaptic membrane	34/1659	239/22834	0.142259	1.95802	4.16734	0.000129081	0.00648351	0.0056649	Cdh2/Erbb2/Rgs7bp/Grik2/Gpm6a/Cntn1/Syt7/Ano2/Cplx3/Grm3/Ephb2/Kcnc2/Slc6a2/Grm8/Kcnh1/Dgki/Adcy8/Slc1a2/Grip1/Cacna1c/Erbb4/Gria1/Nrxn2/Slc6a9/Npy1r/Scn8a/Ano1/Grm2/Fxyd6/Snph/Kcnj3/Lrfn3/Efnb3/Cacna2d1	34
GO:0019722	BP	GO:0019722	calcium-mediated signaling	31/1654	221/23040	0.140271	1.95396	3.96291	0.000261669	0.0201674	0.0177529	Htr2c/Akap6/Edn1/Ednrb/Efhb/Bhlha15/Grm5/Defb37/Cdh13/Tox3/Rcan2/Sgcd/Tnfsf11/Ntrk2/Tff2/Cxcr3/Nr5a2/Nfatc4/Ryr2/Xcr1/Ccr5/Cxcr6/Agtr1b/Ramp3/Cd4/Cd8a/Cxcr1/C3ar1/Myh7b/Ackr2/Nr5a1	31
GO:0045165	BP	GO:0045165	cell fate commitment	43/1654	307/23040	0.140065	1.95109	4.66548	1.97105101671087e-05	0.00522798	0.00460208	Edn1/Nkx2-1/Foxa1/Bhlha15/Sox5/Dmrta2/Gfi1/Ntf3/Fgf8/Mitf/Wnt2/Tenm4/Jag2/Tgfb2/Bhlhe22/Sox6/Gata6/Tnfsf18/Notch3/Prrx1/Pparg/Esrp1/Apc2/Dhh/Wnt9b/Gap43/Bmp4/Chrdl1/Erbb4/Spdef/Tal1/Ihh/Hes5/Foxa2/Glis1/Tbx6/Tbr1/Fgfr3/Gata3/Tbx2/Lhx3/Tbx3/Sox18	43
GO:0072001	BP	GO:0072001	renal system development	50/1654	358/23040	0.139665	1.94551	5.01421	4.69006725538167e-06	0.00174158	0.00153308	Edn1/Ovol1/Pgf/Myc/Ednrb/Ifng/Kcnj1/Cyp4a12a/Cyp4a12b/Lrp2/Prickle1/Fgf8/Glis2/Bmp6/Aqp1/Adipoq/Vcan/Lgr5/Osr1/Tgfb2/Cenpf/Notch3/Foxc1/Dlg5/Wnt9b/Bmp4/Mecom/Lhx1/Invs/Erbb4/Smad9/Serpinb7/Hey1/Tshz3/Bdnf/Pdgfa/Agtr1b/Aqp11/Smad6/Mmp17/Ddc/Hes5/C3ar1/Yap1/Myocd/Gata3/Hc/Lin28a/Col4a3/Cc2d2a	50
GO:0031032	BP	GO:0031032	actomyosin structure organization	31/1654	223/23040	0.139013	1.93644	3.90785	0.000307271	0.0211458	0.0186142	Myh11/Edn1/Carmil1/Fam171a1/Tmeff2/Frmd7/Fhdc1/Myom1/Mylk3/Nebl/Kank4/Actn2/Myo18b/Ldb3/Fhod3/Ccn2/Coro2b/Ect2/Apoa1/Myh6/Cgnl1/Tmod4/Acta1/Eln/Lmod1/Tnnt2/Mypn/Cnn1/Ttn/Actc1/Mybpc2	31
GO:0007416	BP	GO:0007416	synapse assembly	32/1654	231/23040	0.138528	1.92968	3.9493	0.000264312	0.0201674	0.0177529	Cdh2/Lrrtm2/Ptpn13/Flrt2/Gpm6a/Amigo2/Ephb2/Ntrk2/Lrfn4/Lhfpl4/Pcdhb16/Flrt1/Asic2/Dlg5/Lrrc24/Gap43/Erbb4/Gria1/Nrxn2/Lrtm2/Dlg4/Cux2/Bdnf/Prkca/Sdk2/Sdk1/Amigo3/Icam5/Lrfn3/Efnb3/Lrrtm3/Srcin1	32
GO:0051216	BP	GO:0051216	cartilage development	31/1654	224/23040	0.138393	1.92779	3.88053	0.000332615	0.0223213	0.019649	Edn1/Sox5/Itgb8/Loxl2/Fgf18/Bmp6/Ccn3/Osr1/Tgfb2/Cnmd/Sox6/Bmp8a/Ccn2/Prrx1/Pth1r/Creb3l2/Bmp4/Bmp3/Smad9/Ecm1/Hoxa3/Prkca/Axin2/Ihh/Adamts12/Hes5/Fgfr3/Gata3/Efemp1/Satb2/Serpinh1	31
GO:0006814	BP	GO:0006814	sodium ion transport	34/1654	247/23040	0.137652	1.91747	4.03158	0.000195411	0.0178433	0.0157071	Edn1/Ednrb/Kcnj1/Asic5/Fgf14/Nkain4/Cntn1/Slc38a4/Prss8/Osr1/Slc6a2/Kcnk1/Slc4a4/Slc34a1/Asic2/Slc5a5/Scn1b/Scnn1b/Slc5a12/Wnk2/Mfsd4b1/Slc6a9/Plcb1/Scn8a/Scn4b/Fxyd6/Gm5134/Atp1b2/Kcnq1/Slc13a2/Slc4a11/Asic4/Asic3/Slc5a10	34
GO:0098813	BP	GO:0098813	nuclear chromosome segregation	43/1654	316/23040	0.136076	1.89552	4.4577	3.97164259308835e-05	0.00762829	0.00671503	Sgo1/Cenpi/Mcmdc2/Mnd1/Ttk/Cdc6/Prickle1/Cenpe/Psmc3ip/Cdc20/Fbxo5/Ska1/Cenpf/Map10/Cdca8/Nek2/Morc2b/Shoc1/Ect2/Smarcd3/Ccnb1/Nuf2/Ube2c/Hspa1b/Hspa1a/Espl1/Plk1/Brip1/Cdk1/Fmn2/Uhrf1/Klhdc8b/Stag3/Khdc3/Fancd2/Knl1/Ccne2/Kif14/Spag5/Cit/Aurkb/Spdl1/Ncapg	43
GO:0003007	BP	GO:0003007	heart morphogenesis	40/1654	294/23040	0.136054	1.89522	4.29621	7.28636165567765e-05	0.0104064	0.00916056	Has2/Edn1/Pkp2/Ankrd1/Flrt2/Lrp2/Prickle1/Adamts5/Lefty1/Fgf8/Wnt2/Fgfrl1/Tnnc1/Tgfb2/Gata6/Foxc1/Smarcd3/Asb2/Myl3/Myh6/Bmp4/Hey1/Ryr2/Eln/Axin2/Ihh/Npy1r/Smad6/Tbx6/Ephb4/Yap1/Epo/Tnnt2/Gata3/Fzd2/Tbx2/Epor/Tbx3/Ttn/Actc1	40
GO:0050767	BP	GO:0050767	regulation of neurogenesis	67/1654	493/23040	0.135903	1.89311	5.57464	3.36700831676786e-07	0.000312571	0.00027515	Myc/Daam2/Map1b/Ifng/Il33/Grm5/Rtn4r/Bhlhe41/Bex1/Dmrta2/Il34/Slit1/Sema5a/Sema3f/Lrp2/Ntf3/Clcn2/Map3k13/Wnt2/Ephb2/Trpc5/Syngap1/Islr2/Sema3d/Sema3e/Vcan/Ptprf/Ptprz1/Tenm4/Rassf10/Kalrn/Ntrk2/Sema4g/Sema6a/Abcc8/Smarcd3/Pparg/Bmp4/Map2/Grip1/Nfatc4/Myrf/Hey1/Xrcc5/Dlg4/Cux2/Bdnf/Ccr5/Tert/Crabp2/Bcan/Prtg/Khdc3/Hes5/Lhx2/Plxna1/Yap1/Trpc6/Aspa/Ascl2/Fgfr3/Cit/Efnb3/Hes7/Lin28a/Hap1/Map6	67
GO:0003012	BP	GO:0003012	muscle system process	61/1654	449/23040	0.135857	1.89248	5.31113	1.13162567580656e-06	0.000700351	0.000616504	Akap6/Myh11/Edn1/Pkp2/Spx/Mlip/Ednrb/Atp2a1/Acta2/Gucy1a1/Trpc3/Synm/Myom1/Arhgap42/Stac3/Abat/Kcnd2/Sgcd/Actn2/Tnnc1/Calca/Gata6/Pde9a/Ccn2/Abcc8/Pparg/Asb2/Myl3/Stac/Myh6/Bmp4/Adra2b/Cacna1c/Scn1b/Scnn1b/Tmod4/Ppara/Igfbp5/Ryr2/Tshz3/Prkca/Tbxa2r/Npy1r/Scn4b/Meis1/Myocd/Tpm2/Lmod1/Tnnt2/Kcnq1/Trip10/Tbx2/Myh7b/Pgam2/Cacna2d1/Tbx3/Calcrl/Ttn/Kcnh2/Actc1/Mybpc2	61
GO:0008016	BP	GO:0008016	regulation of heart contraction	27/1654	199/23040	0.135678	1.88998	3.50659	0.00105539	0.0411087	0.0361871	Akap6/Edn1/Pkp2/Spx/Ednrb/Ifng/Kcnd2/Irx5/Gnao1/Hbegf/Tgfb2/Ccn2/Myl3/Myh6/Cacna1c/Scn1b/Ryr2/Prkca/Scn4b/Tnnt2/Kcnq1/Tnni3k/Gjc1/Myh7b/Cacna2d1/Cacna1b/Kcnh2	27
GO:0005216	MF	GO:0005216	monoatomic ion channel activity	60/1651	434/22548	0.138249	1.88809	5.25102	1.45873386826119e-06	0.000533605	0.00048989	Kcnj1/Asic5/Chrna2/Trpc3/Grik2/Kcnj15/Gpm6a/Ano2/Clcn2/Tmc1/Kcnd2/Trpc5/Aqp1/Trpc1/Catsper2/Kcnc2/Cachd1/Kcnk1/Kcnh1/Abcc8/Tmc5/Kcnk4/Asic2/Kcnd1/Kcnn3/Kcns1/Kcnk7/Cacna1c/Scn1b/Gria1/Scnn1b/Cacna2d4/Best3/Kcnq4/Cngb3/Ryr2/Kcnt2/Ano3/Scn8a/Ano1/Kcnj14/Scn4b/Otop1/Trpc6/Kcnj3/Trpm8/Best2/Kcnq1/Calhm5/Ano7/Gjc1/Kcnab3/Cacna2d1/Cacna1b/Pkd1l1/Slc4a11/Asic4/Kcnh2/Asic3/Cacng6	60
GO:0046873	MF	GO:0046873	metal ion transmembrane transporter activity	60/1651	435/22548	0.137931	1.88375	5.23149	1.57405547048848e-06	0.000533605	0.00048989	Kcnj1/Atp2a1/Asic5/Trpc3/Grik2/Kcnj15/Gpm6a/Slc38a4/Tmc1/Kcnd2/Slc18a1/Trpc5/Aqp1/Trpc1/Catsper2/Kcnc2/Slc6a2/Cachd1/Kcnk1/Kcnh1/Abcc8/Slc4a4/Kcnk4/Slc34a1/Asic2/Kcnd1/Kcnn3/Kcns1/Kcnk7/Slc5a5/Slc1a2/Cacna1c/Scn1b/Scnn1b/Cacna2d4/Kcnq4/Ryr2/Kcnt2/Slc6a9/Slc40a1/Scn8a/Kcnj14/Scn4b/Gm5134/Trpc6/Kcnj3/Atp1b2/Trpm8/Kcnq1/Slc13a2/Kcnab3/Cacna2d1/Cacna1b/Pkd1l1/Slc4a11/Asic4/Kcnh2/Asic3/Cacng6/Slc5a10	60
GO:0003015	BP	GO:0003015	heart process	34/1654	252/23040	0.134921	1.87943	3.90375	0.000286141	0.0205787	0.018115	Akap6/Edn1/Pkp2/Spx/Ednrb/Ifng/Kcnd2/Sgcd/Tnnc1/Irx5/Gnao1/Hbegf/Tgfb2/Gata6/Ccn2/Myl3/Myh6/Cacna1c/Scn1b/Ryr2/Prkca/Ramp3/Scn4b/Yap1/Tnnt2/Kcnq1/Tnni3k/Gjc1/Myh7b/Cacna2d1/Cacna1b/Ttn/Kcnh2/Actc1	34
GO:0022836	MF	GO:0022836	gated channel activity	41/1651	298/22548	0.137584	1.87901	4.2935	7.13381902623288e-05	0.00906887	0.00832592	Kcnj1/Asic5/Chrna2/Trpc3/Grik2/Kcnj15/Clcn2/Tmc1/Kcnd2/Aqp1/Catsper2/Kcnc2/Cachd1/Kcnk1/Kcnh1/Tmc5/Kcnk4/Asic2/Kcnd1/Kcnn3/Kcns1/Kcnk7/Cacna1c/Gria1/Scnn1b/Cacna2d4/Kcnq4/Cngb3/Ryr2/Kcnt2/Ano1/Kcnj14/Kcnj3/Trpm8/Kcnq1/Kcnab3/Cacna2d1/Cacna1b/Asic4/Kcnh2/Asic3	41
GO:0001822	BP	GO:0001822	kidney development	46/1654	342/23040	0.134503	1.87361	4.52658	2.91966924172096e-05	0.00602526	0.00530391	Edn1/Ovol1/Pgf/Myc/Ednrb/Ifng/Kcnj1/Cyp4a12a/Cyp4a12b/Lrp2/Fgf8/Glis2/Bmp6/Aqp1/Adipoq/Vcan/Osr1/Tgfb2/Cenpf/Notch3/Foxc1/Dlg5/Wnt9b/Bmp4/Lhx1/Invs/Erbb4/Smad9/Serpinb7/Hey1/Tshz3/Bdnf/Pdgfa/Agtr1b/Aqp11/Smad6/Mmp17/Ddc/Hes5/C3ar1/Yap1/Gata3/Hc/Lin28a/Col4a3/Cc2d2a	46
GO:0048863	BP	GO:0048863	stem cell differentiation	38/1654	283/23040	0.134276	1.87044	4.09742	0.000143713	0.0160096	0.0140929	Cdh2/Edn1/Foxa1/Esrrb/Ednrb/Sox5/Cyp26a1/Dmrta2/Sema5a/Gpm6a/Sema3f/Prickle1/Sema3d/Sema3e/Trp63/Osr1/Tgfb2/Sox6/Gata6/Sema4g/Sema6a/Foxc1/Zscan10/Bmp4/Erbb4/Kitl/Xrcc5/Tal1/Prkca/Hes5/Yap1/Myocd/Tcf7l1/Tbx2/Tbx3/Lin28a/Slc4a11/Sox18	38
GO:0051146	BP	GO:0051146	striated muscle cell differentiation	47/1654	351/23040	0.133903	1.86525	4.5428	2.69601483915534e-05	0.00600672	0.00528759	Cdh2/Akap6/Myh11/Edn1/Myc/Bhlha15/Bhlhe41/Myom1/Prickle1/Stac3/Adamts5/Mylk3/Ccn3/Cntnap1/Nebl/Sgcd/Actn2/Cacybp/Myo18b/Sox6/Gata6/Ldb3/Fhod3/Asb2/Myorg/Myh6/Cxcl10/Bmp4/Tmod4/Ppara/Igfbp5/Acta1/Bdnf/Meis1/Myocd/Mamstr/Tanc1/Lmod1/Tnnt2/Trip10/Mypn/Klhl40/Tbx3/Ttn/Actc1/Mybpc2/Plpp7	47
GO:0140014	BP	GO:0140014	mitotic nuclear division	36/1654	269/23040	0.133829	1.86422	3.96501	0.000226485	0.0193744	0.0170549	Edn1/Cenpi/Ttk/Prickle1/Fgf8/Cenpe/Cdc20/Fbxo5/Ska1/Map10/Cdca8/Nek2/Nme6/L3mbtl1/Ccnb1/Bmp4/Nuf2/Ube2c/Cdca2/Hspa1b/Hspa1a/Espl1/Plk1/Cdk1/Uhrf1/Klhdc8b/Khdc3/Tgfa/Knl1/Fgfr3/Kif14/Spag5/Cit/Aurkb/Spdl1/Ncapg	36
GO:0060047	BP	GO:0060047	heart contraction	32/1654	240/23040	0.133333	1.85732	3.7129	0.000523778	0.0279792	0.0246295	Akap6/Edn1/Pkp2/Spx/Ednrb/Ifng/Kcnd2/Sgcd/Tnnc1/Irx5/Gnao1/Hbegf/Tgfb2/Gata6/Ccn2/Myl3/Myh6/Cacna1c/Scn1b/Ryr2/Prkca/Scn4b/Tnnt2/Kcnq1/Tnni3k/Gjc1/Myh7b/Cacna2d1/Cacna1b/Ttn/Kcnh2/Actc1	32
GO:0050679	BP	GO:0050679	positive regulation of epithelial cell proliferation	31/1654	233/23040	0.133047	1.85333	3.64079	0.000658189	0.0316044	0.0278207	Has2/Pgf/Myc/Esrp2/St8sia1/Erbb2/Sema5a/Fgf18/Bmp6/Wnt2/Cdh13/Trp63/Jcad/Osr1/Cyp7b1/Vash2/Esrp1/Bmp4/Erbb4/Arg1/Ecm1/Prkca/Mmp12/Ihh/Agtr1b/Cdh3/Tgfa/Gpbar1/Yap1/Fgfr3/Fgfbp1	31
GO:1903046	BP	GO:1903046	meiotic cell cycle process	32/1654	241/23040	0.13278	1.84961	3.68727	0.000563319	0.0290235	0.0255488	Edn1/Ovol1/Tdrd9/Sgo1/Grb14/Mcmdc2/Mnd1/Hfm1/Ttk/Cenpe/Psmc3ip/Cdc20/Fbxo5/Morc2b/Shoc1/Kctd19/Hus1b/Nuf2/Espl1/Plk1/Brip1/Fmn2/Plcb1/Stag3/Fancd2/Knl1/Ccne2/Fignl1/Cenps/Tdrd12/Eme1/Gpr3	32
GO:0050803	BP	GO:0050803	regulation of synapse structure or activity	42/1654	317/23040	0.132492	1.8456	4.21595	8.97443617291003e-05	0.0121344	0.0106817	Cdh2/Lrfn2/Lrrtm2/Ptpn13/Flrt2/Dact1/Gpm6a/Sema3f/Nrcam/Amigo2/Ephb2/Syngap1/Cntnap1/Ptprf/Cdc20/Kalrn/Ntrk2/Lrfn4/Lhfpl4/Flrt1/Asic2/Sybu/Dlg5/Lrrc24/Zfp804a/Tanc2/Nfatc4/Lrtm2/Dlg4/Cux2/Bdnf/Prkca/Arc/Dab2ip/Hspa8/Amigo3/Tanc1/Icam5/Lrfn3/Efnb3/Lrrtm3/Srcin1	42
GO:1903522	BP	GO:1903522	regulation of blood circulation	36/1654	273/23040	0.131868	1.83691	3.86847	0.000302384	0.0211458	0.0186142	Htr2c/Akap6/Edn1/Pkp2/Spx/Ednrb/Ifng/Arhgap42/Kcnd2/Irx5/Gnao1/Hbegf/Tgfb2/Ccn2/Asic2/Myl3/Myh6/Adra2b/Cacna1c/Scn1b/Ryr2/Prkca/Tbxa2r/Npy1r/Agtr1b/Smad6/Scn4b/Tnnt2/Kcnq1/Tnni3k/Gjc1/Avp/Myh7b/Cacna2d1/Cacna1b/Kcnh2	36
GO:0000819	BP	GO:0000819	sister chromatid segregation	29/1654	221/23040	0.131222	1.8279	3.43923	0.00120024	0.0455412	0.040089	Cenpi/Ttk/Cdc6/Prickle1/Cenpe/Cdc20/Fbxo5/Ska1/Map10/Cdca8/Nek2/Smarcd3/Ccnb1/Nuf2/Ube2c/Hspa1b/Hspa1a/Espl1/Plk1/Cdk1/Uhrf1/Khdc3/Knl1/Kif14/Spag5/Cit/Aurkb/Spdl1/Ncapg	29
GO:0045664	BP	GO:0045664	regulation of neuron differentiation	32/1654	245/23040	0.130612	1.81941	3.58591	0.000749045	0.0333848	0.0293879	Foxa1/Map1b/Ednrb/Ifng/Sh3gl3/Sox5/Bex1/Ntf3/Bmp6/Map3k13/Trpc5/Rgs6/Notch3/Ect2/Esrp1/Bmp4/Adra2b/Hey1/Bdnf/Ccr5/Brinp3/Hes5/Foxa2/Gprc5b/Meis1/Tbx6/Trpc6/Epo/Fgfr3/Cit/Lin28a/Mmd	32
GO:0048762	BP	GO:0048762	mesenchymal cell differentiation	33/1654	253/23040	0.130435	1.81694	3.63363	0.000640289	0.0310123	0.0272995	Cdh2/Has2/Edn1/Nkx2-1/Foxa1/Ednrb/Timp3/Cyp26a1/Loxl2/Sema5a/Sema3f/Fgf8/Wnt2/Sema3d/Sema3e/Osr1/Tgfb2/Sema4g/Sema6a/Foxc1/Dlg5/Bmp4/Erbb4/Kitl/Hey1/Axin2/Dab2ip/Foxa2/Myocd/Trip10/Zfp750/Gata3/Tbx3	33
GO:0010001	BP	GO:0010001	glial cell differentiation	38/1654	292/23040	0.130137	1.81279	3.88717	0.00027324	0.0202926	0.0178632	Cdh2/Plpp3/Nkx2-1/Daam2/Ifng/Il33/Erbb2/Sox5/Il34/Wasf3/Cntn1/Ntf3/Clcn2/Gpm6b/Cntnap1/Vcan/Ptprz1/Tenm4/Sox6/Ntrk2/Pou3f1/Vtn/Pard3/Pparg/Dhh/Gap43/Bmp4/Mal/Myrf/Crb1/Tal1/Tppp/Bcan/Ano1/Hes5/Aspa/Fgfr3/Lin28a	38
GO:0050807	BP	GO:0050807	regulation of synapse organization	40/1654	309/23040	0.12945	1.80322	3.95311	0.000214152	0.018638	0.0164066	Cdh2/Lrfn2/Lrrtm2/Ptpn13/Flrt2/Dact1/Gpm6a/Sema3f/Nrcam/Amigo2/Ephb2/Cntnap1/Ptprf/Cdc20/Kalrn/Ntrk2/Lrfn4/Lhfpl4/Flrt1/Asic2/Dlg5/Lrrc24/Zfp804a/Tanc2/Nfatc4/Lrtm2/Dlg4/Cux2/Bdnf/Prkca/Arc/Dab2ip/Hspa8/Amigo3/Tanc1/Icam5/Lrfn3/Efnb3/Lrrtm3/Srcin1	40
GO:0045211	CC	GO:0045211	postsynaptic membrane	46/1659	353/22834	0.130312	1.79357	4.2059	8.47691946072693e-05	0.0047386	0.00414031	Cdh2/Gpr156/Lrfn2/Lrrtm2/Chrna2/Erbb2/Grm5/Sspn/Rgs7bp/Grik2/Cntn1/Nrcam/Lin7a/Kcnd2/Grm3/Ephb2/Ptprf/Ptprz1/Kcnc2/Actn2/Ntrk2/Lrfn4/Lhfpl4/Shisa6/Pcdhb16/Kcnh1/Kcnd1/Ddn/Dgki/Grip1/Cacna1c/Erbb4/Gria1/Faim2/Dlg4/Slc6a9/Hspb1/Igsf9b/Arc/Scn8a/Hspa8/Fxyd6/Lrfn3/Efnb3/Lrrtm3/Cacna2d1	46
GO:0007389	BP	GO:0007389	pattern specification process	63/1654	491/23040	0.12831	1.78734	4.90424	5.19661864917809e-06	0.00180907	0.00159249	Edn1/Nkx2-1/Foxa1/Daam2/Ripply3/Cyp26a1/Bhlhe41/Dmrta2/Dnah5/Pld6/Nr2f1/Sema3f/Lrp2/Prickle1/Lefty1/Fgf8/Wnt2/Tll1/Syngap1/Trp63/Osr1/Bhlhe22/Foxc1/Smarcd3/Asb2/Apc2/Bmp4/Chrdl1/Shroom3/Lhx1/Invs/Erbb4/Hey1/Mns1/Hoxa4/Hoxa3/Axin2/Dand5/Ihh/Arc/Dnaaf4/Smad6/Cobl/Hes5/Foxa2/Meis1/Mmp21/Lhx2/Tbx6/Tbr1/Tcf7l1/Tbx2/Tmem107/Hes7/Hoxb6/Hoxb5/Lhx3/Tbx3/Pkd1l1/Satb2/Ttn/Foxj1/Cc2d2a	63
GO:0051962	BP	GO:0051962	positive regulation of nervous system development	50/1654	391/23040	0.127877	1.78131	4.33335	5.14099328414314e-05	0.00834238	0.00734363	Myc/Map1b/Lrrtm2/Ifng/Il33/Flrt2/Grm5/Bex1/Dmrta2/Il34/Sema5a/Lrp2/Ntf3/Amigo2/Clcn2/Map3k13/Wnt2/Ephb2/Trpc5/Islr2/Vcan/Ptprf/Ptprz1/Tenm4/Rassf10/Kalrn/Ntrk2/Flrt1/Smarcd3/Pparg/Asic2/Dlg5/Lrrc24/Grip1/Myrf/Lrtm2/Xrcc5/Dlg4/Cux2/Bdnf/Prkca/Crabp2/Bcan/Khdc3/Amigo3/Plxna1/Aspa/Lrrtm3/Hap1/Map6	50
GO:0003779	MF	GO:0003779	actin binding	58/1651	447/22548	0.129754	1.77207	4.63427	1.53981455274023e-05	0.00313198	0.0028754	Myh11/Ablim3/Daam2/Pof1b/Map1b/Cap2/Nexn/Ppp1r42/Pdlim3/Wasf1/Avil/Fhdc1/Sptbn5/Wasf3/Coro6/Myo1a/Palld/Map1a/Wipf3/Trpc5/Ablim2/Nebl/Actn2/Tnnc1/Slc6a2/Myo18b/Vash2/Ldb3/Fhod3/Coro2b/Gbp2b/Prickle4/Myl3/Myh6/Map2/Ajuba/Adcy8/Shroom3/Tln2/Tmod4/Ccr5/Mib2/Fmn2/Arc/Mlph/Cobl/Spata32/Trpc6/Tpm2/Lmod1/Tnnt2/Mypn/Myh7b/Cnn1/Eps8l2/Ttn/Mybpc2/Vinac1	58
GO:0018108	BP	GO:0018108	peptidyl-tyrosine phosphorylation	39/1654	307/23040	0.127036	1.76959	3.77517	0.000374124	0.0240437	0.0211651	Plpp3/Ifng/Gfra1/Prlr/Erbb2/Grm5/Ttk/Hyal2/Il34/Cspg4/Cntn1/Ntf3/Fgf8/Bmp6/Ephb2/Adipoq/Ptprz1/Hbegf/Ttbk1/Tnfsf18/Vtn/Csf2/Ddr2/Erbb4/Kitl/Itgb2l/Prkca/Pdgfa/Tgfa/Cd4/Hes5/Gprc5b/Epo/Fgfr3/Srcin1/Hpx/Efemp1/Ptk6/Srms	39
GO:0018212	BP	GO:0018212	peptidyl-tyrosine modification	39/1654	309/23040	0.126214	1.75814	3.73124	0.000426124	0.0255216	0.0224662	Plpp3/Ifng/Gfra1/Prlr/Erbb2/Grm5/Ttk/Hyal2/Il34/Cspg4/Cntn1/Ntf3/Fgf8/Bmp6/Ephb2/Adipoq/Ptprz1/Hbegf/Ttbk1/Tnfsf18/Vtn/Csf2/Ddr2/Erbb4/Kitl/Itgb2l/Prkca/Pdgfa/Tgfa/Cd4/Hes5/Gprc5b/Epo/Fgfr3/Srcin1/Hpx/Efemp1/Ptk6/Srms	39
GO:1904062	BP	GO:1904062	regulation of monoatomic cation transmembrane transport	41/1654	327/23040	0.125382	1.74656	3.78125	0.000353638	0.0234496	0.0206422	Akap6/Edn1/Ifng/Kcnj1/Trpc3/Fgf14/Stac3/Dpp10/Prss8/Tmc1/Trpc1/Kcnc2/Actn2/Osr1/Tgfb2/Npsr1/Dpp6/Kcns1/Stac/Cxcl10/Bmp4/Cacna1c/Scn1b/Cxcr3/Ryr2/Wnk2/Plcb1/Cd4/Scn4b/Fxyd6/Epo/Atp1b2/Fcrl5/Kcnq1/Kcnab3/Cacna2d1/Hap1/Kcnh2/Cacng6/Lcn2/Lime1	41
GO:0033002	BP	GO:0033002	muscle cell proliferation	35/1654	280/23040	0.125	1.74123	3.47042	0.000970834	0.0386585	0.0340303	Efemp2/Edn1/Myc/Timp3/Ifng/Tafa5/Mapk11/Wnt2/Cdh13/Ccn3/Adipoq/Tenm4/Hbegf/Tgfb2/Gata6/Notch3/Foxc1/Pparg/Ccnb1/Bmp4/Rgs5/Ddr2/Erbb4/Xrcc5/Cdk1/Igfbp5/Tert/Prkca/Hes5/C3ar1/Yap1/Myocd/Tbx2/Cnn1/Calcrl	35
GO:0060485	BP	GO:0060485	mesenchyme development	39/1654	313/23040	0.124601	1.73567	3.64434	0.000549798	0.0286203	0.0251939	Cdh2/Has2/Edn1/Myc/Nkx2-1/Foxa1/Ednrb/Timp3/Cyp26a1/Loxl2/Sema5a/Sema3f/Prickle1/Adamts5/Fgf8/Wnt2/Sema3d/Sema3e/Osr1/Tgfb2/Sema4g/Sema6a/Foxc1/Dlg5/Bmp4/Erbb4/Kitl/Hey1/Axin2/Dand5/Dab2ip/Foxa2/Yap1/Myocd/Trip10/Zfp750/Gata3/Tbx2/Tbx3	39
GO:0042692	BP	GO:0042692	muscle cell differentiation	59/1654	474/23040	0.124473	1.73389	4.48978	2.54254315697561e-05	0.00590082	0.00519437	Cdh2/Akap6/Myh11/Efemp2/Edn1/Myc/Ednrb/Bhlha15/Bhlhe41/Myom1/Prickle1/Stac3/Ntf3/Adamts5/Mylk3/Ccn3/Cntnap1/Nebl/Sgcd/Actn2/Cacybp/Myo18b/Sox6/Gata6/Ldb3/Fhod3/Smarcd3/Asb2/Myorg/Myh6/Cxcl10/Bmp4/Cfd/Nfatc4/Tmod4/Hey1/Ppara/Igfbp5/Acta1/Tshz3/Bdnf/Smad6/Meis1/Myocd/Mamstr/Tanc1/Tcf23/Lmod1/Tnnt2/Trip10/Uchl1/Mypn/Tbx2/Klhl40/Tbx3/Ttn/Actc1/Mybpc2/Plpp7	59
GO:0000280	BP	GO:0000280	nuclear division	56/1654	452/23040	0.123894	1.72582	4.33408	4.59972698070552e-05	0.00810308	0.00713298	Edn1/Tdrd9/Sgo1/Cenpi/Mcmdc2/Mnd1/Hfm1/Ttk/Prickle1/Fgf8/Cenpe/Psmc3ip/Cdc20/Fbxo5/Ska1/Map10/Cdca8/Nek2/Nme6/Morc2b/Shoc1/L3mbtl1/Ccnb1/Kctd19/Bmp4/Nuf2/Ube2c/Cdca2/Hspa1b/Hspa1a/Espl1/Plk1/Brip1/Cdk1/Fmn2/Uhrf1/Plcb1/Klhdc8b/Stag3/Khdc3/Fancd2/Tgfa/Knl1/Ccne2/Fignl1/Cenps/Fgfr3/Kif14/Spag5/Cit/Tdrd12/Eme1/Aurkb/Gpr3/Spdl1/Ncapg	56
GO:0003002	BP	GO:0003002	regionalization	55/1654	448/23040	0.122768	1.71014	4.22124	6.85935650610231e-05	0.0100544	0.00885066	Edn1/Nkx2-1/Foxa1/Daam2/Cyp26a1/Bhlhe41/Dmrta2/Dnah5/Pld6/Nr2f1/Sema3f/Lrp2/Prickle1/Lefty1/Fgf8/Wnt2/Tll1/Trp63/Osr1/Bhlhe22/Foxc1/Smarcd3/Asb2/Bmp4/Lhx1/Invs/Hey1/Mns1/Hoxa4/Hoxa3/Axin2/Dand5/Ihh/Arc/Dnaaf4/Smad6/Cobl/Hes5/Foxa2/Mmp21/Lhx2/Tbx6/Tbr1/Tcf7l1/Tbx2/Tmem107/Hes7/Hoxb6/Hoxb5/Lhx3/Tbx3/Pkd1l1/Ttn/Foxj1/Cc2d2a	55
GO:0042063	BP	GO:0042063	gliogenesis	48/1654	396/23040	0.121212	1.68847	3.84317	0.000260186	0.0201674	0.0177529	Cdh2/Myc/Plpp3/Nkx2-1/Daam2/Ifng/Il33/Erbb2/Sox5/Il34/Wasf3/Cspg4/Cntn1/Lrp2/Ntf3/Clcn2/Gpm6b/Cntnap1/Vcan/Ptprz1/Tenm4/Tgfb2/Sox6/Ntrk2/Pou3f1/Vtn/Abcc8/Pard3/Pparg/Dhh/Gap43/Bmp4/Mal/Myrf/Crb1/Tal1/Tert/Tppp/Bcan/Ano1/Dab2ip/Hes5/Atp1b2/Aspa/Ascl2/Fgfr3/Lin28a/Efemp1	48
GO:0015631	MF	GO:0015631	tubulin binding	48/1651	390/22548	0.123077	1.68088	3.81255	0.000285347	0.0181373	0.0166515	Nme8/Enkd1/Kif6/Map1b/Ift81/Reep1/Gtse1/Ppp1r42/Ttll9/Stmn4/Fhdc1/Bex4/Togaram2/Gja6/Stmn3/Map1a/Wipf3/Cenpe/Cacybp/Slc6a2/Ska1/Map10/Vash2/Sybu/Reep2/Mtus1/Apc2/Kif24/D7Ertd443e/Map2/Nuf2/Ttll12/Rp1/Plk1/Fmn2/Tppp/Fsd1/Cep57l1/Dlec1/Mlph/Agbl5/Hsph1/Cep295nl/Kif14/Spag5/Katnal1/Ccdc187/Map6	48
GO:0050678	BP	GO:0050678	regulation of epithelial cell proliferation	51/1654	423/23040	0.120567	1.67949	3.92255	0.000193777	0.0178433	0.0157071	Has2/Ovol1/Pgf/Myc/Ednrb/Ifng/Esrp2/St8sia1/Erbb2/Atoh8/Sema5a/Fgf18/Bmp6/Wnt2/Cdh13/Trp63/Jcad/Cpb2/Osr1/Tgfb2/Cnmd/Cyp7b1/Vash2/Gkn3/Pparg/Esrp1/Bmp4/Erbb4/Cxcr3/Arg1/Cdkn2a/Hey1/Ecm1/Prkca/Mmp12/Uhrf1/Marveld3/Ihh/Agtr1b/Aqp11/Cdh3/Tgfa/Irf6/Dab2ip/Hes5/Gpbar1/Yap1/Fgfr3/Gata3/Col4a3/Fgfbp1	51
GO:0045121	CC	GO:0045121	membrane raft	37/1659	305/22834	0.121311	1.6697	3.29572	0.00151609	0.0299428	0.0261623	Cdh2/Akap6/Has2/Plpp3/Rtn4r/Hyal2/Myo1a/Cdh13/Prss8/Kcnd2/Aqp1/Gpm6b/Trpc1/Cd55b/Adtrp/Adcy8/Slc1a2/Mal/Grip1/Cacna1c/Hspa1b/Hspa1a/Erbb4/Faim2/Itgb2l/Arc/Eno2/Cd4/Irs1/Gprc5b/Cd8a/Prtn3/Kcnq1/Rtn4rl2/Adam1a/Ptgis/Serpinh1	37
GO:0007059	BP	GO:0007059	chromosome segregation	50/1654	418/23040	0.119617	1.66625	3.82293	0.000269008	0.0202483	0.0178242	Sgo1/Esco2/Cenpi/Mcmdc2/Mnd1/Ttk/Bex4/Cdc6/Prickle1/Cenpn/Cenpe/Psmc3ip/Cdc20/Fbxo5/Brca1/Ska1/Cenpf/Map10/Cdca8/Nek2/Morc2b/Shoc1/Ect2/Smarcd3/Ccnb1/Nuf2/Ube2c/Cdca2/Hspa1b/Hspa1a/Espl1/Plk1/Brip1/Cdk1/Fmn2/Uhrf1/Klhdc8b/Stag3/Khdc3/Fancd2/Knl1/Ccne2/Cenps/Kif14/Spag5/Cit/Tubb1/Aurkb/Spdl1/Ncapg	50
GO:0061448	BP	GO:0061448	connective tissue development	38/1654	318/23040	0.119497	1.66458	3.31871	0.00140385	0.0497877	0.0438271	Edn1/Foxa1/Ifng/Sox5/Itgb8/Loxl2/Fgf18/Bmp6/Ccn3/Osr1/Tgfb2/Cnmd/Sox6/Bmp8a/Ccn2/Prrx1/Pparg/Pth1r/Creb3l2/Bmp4/Bmp3/Rorc/Smad9/Serpinb7/Ecm1/Hoxa3/Prkca/Axin2/Ihh/Adamts12/Hes5/Foxa2/C3ar1/Fgfr3/Gata3/Efemp1/Satb2/Serpinh1	38
GO:0098857	CC	GO:0098857	membrane microdomain	37/1659	306/22834	0.120915	1.66424	3.27429	0.00160695	0.0299428	0.0261623	Cdh2/Akap6/Has2/Plpp3/Rtn4r/Hyal2/Myo1a/Cdh13/Prss8/Kcnd2/Aqp1/Gpm6b/Trpc1/Cd55b/Adtrp/Adcy8/Slc1a2/Mal/Grip1/Cacna1c/Hspa1b/Hspa1a/Erbb4/Faim2/Itgb2l/Arc/Eno2/Cd4/Irs1/Gprc5b/Cd8a/Prtn3/Kcnq1/Rtn4rl2/Adam1a/Ptgis/Serpinh1	37
GO:0014069	CC	GO:0014069	postsynaptic density	46/1659	381/22834	0.120735	1.66176	3.64602	0.000488196	0.0129953	0.0113545	Cdh2/Lrfn2/Map1b/Lrrtm2/Cap2/Sh3gl3/Snap47/Drp2/Grm5/Rgs7bp/Grik2/Nrcam/Map1a/Grm3/Syngap1/Ptprf/Ptprz1/Dclk1/Actn2/Kalrn/Ntrk2/Lrfn4/Shisa6/Dlg5/Gap43/Dgki/Map2/Adcy8/Grip1/Cacna1c/Erbb4/Gria1/Tanc2/Dlg4/Slc6a9/Hspb1/Arc/Scn8a/Camk2n1/Hspa8/Tanc1/Lrfn3/Efnb3/Lrrtm3/Srcin1/Cabp1	46
GO:0043235	CC	GO:0043235	receptor complex	50/1659	415/22834	0.120482	1.65828	3.78808	0.000299356	0.010269	0.00897248	Htr2c/Gpr156/Cd200r1/Gfra1/Prlr/Chrna2/Tyro3/Erbb2/Ptprn2/Itgb8/Itgbl1/Grik2/Loxl4/Lrp2/Ifnlr1/Tnfrsf11b/Cubn/Trpc1/Klrc2/Gfra3/Ntrk2/Notch3/Shisa6/Pparg/Csf2/Pth1r/Cntfr/Ddr2/Erbb4/Gria1/Amhr2/Dlg4/Itgb2l/Adrb3/Il23r/Ramp3/Gfra2/Irs1/Gprc5b/Cd8a/Gpbar1/Plxna1/Ephb4/Emilin1/Pla2r1/Tspan32/Fcrl5/Fgfr3/Calcrl/Lime1	50
GO:0010959	BP	GO:0010959	regulation of metal ion transport	51/1654	430/23040	0.118605	1.65215	3.79633	0.000288176	0.0205787	0.018115	Akap6/Efhb/Ifng/Kcnj1/Trpc3/Fgf14/Nkain4/Cntn1/Stc2/Stac3/Dpp10/Prss8/Tmc1/Trpc1/Cldn16/Kcnc2/Actn2/Osr1/Gnao1/Tgfb2/Abcc8/Npsr1/Dpp6/Kcns1/Stac/Cxcl10/Bmp4/Cacna1c/Scn1b/Cxcr3/Scnn1b/Ryr2/Wnk2/Plcb1/Hsd3b2/Cd4/Scn4b/Fxyd6/Trpc6/Epo/Atp1b2/Fcrl5/Kcnq1/Kcnab3/Cacna2d1/Cacna1b/Hap1/Kcnh2/Cacng6/Lcn2/Lime1	51
GO:0050769	BP	GO:0050769	positive regulation of neurogenesis	39/1654	329/23040	0.118541	1.65126	3.30879	0.00142165	0.0497877	0.0438271	Myc/Map1b/Ifng/Il33/Grm5/Bex1/Dmrta2/Il34/Sema5a/Lrp2/Ntf3/Clcn2/Map3k13/Wnt2/Ephb2/Trpc5/Islr2/Vcan/Ptprf/Ptprz1/Tenm4/Rassf10/Kalrn/Ntrk2/Smarcd3/Pparg/Grip1/Myrf/Xrcc5/Dlg4/Cux2/Bdnf/Crabp2/Bcan/Khdc3/Plxna1/Aspa/Hap1/Map6	39
GO:0016324	CC	GO:0016324	apical plasma membrane	51/1659	426/22834	0.119718	1.64777	3.7776	0.000305025	0.010269	0.00897248	Cdh2/Fat1/Atp8b1/Sytl4/Erbb2/Zmynd10/Hyal2/Cyp4a12a/Cyp4a12b/Lrp2/Myo1a/Cubn/Aqp1/Cd55b/Havcr1/Kcnc2/Gnat3/Naaladl1/Slc15a2/Kcnk1/Pard3/Cd34/Slc34a1/Pth1r/Cntfr/Atp6v0a4/Adcy8/Mal/Ddr2/Shroom3/Mgam/Hspa1b/Hspa1a/Cblif/Otoa/Scnn1b/Igfbp2/Slc5a12/Lmo7/Slc6a9/Gnat1/Ano1/Rab27a/Atp1b2/Kcnq1/Slc13a2/Npc1l1/Slc7a13/Slc4a11/Slc47a2/Pard6b	51
GO:1902495	CC	GO:1902495	transmembrane transporter complex	51/1659	426/22834	0.119718	1.64777	3.7776	0.000305025	0.010269	0.00897248	Akap6/Kcnj1/Chrna2/Trpc3/Grik2/Kcnj15/Ano2/Stac3/Clcn2/Dpp10/Kcnd2/Trpc5/Trpc1/Catsper2/Wdr93/Kcnc2/Cachd1/Kcnk1/Shisa6/Kcnh1/Abcc8/Kcnk4/Kcnd1/Dpp6/Kcns1/Kcnk7/Cacna1c/Scn1b/Gria1/Scnn1b/Cacna2d4/Best3/Dlg4/Kcnq4/Cngb3/Ryr2/Scn8a/Ano1/Kcnj14/Scn4b/Trpc6/Kcnj3/Atp1b2/Best2/Kcnq1/Kcnab3/Cacna2d1/Cacna1b/Pkd1l1/Kcnh2/Cacng6	51
GO:0060271	BP	GO:0060271	cilium assembly	46/1654	397/23040	0.115869	1.61404	3.4321	0.000915689	0.0383488	0.0337576	Nme8/Ablim3/Enkd1/Rfx4/Cfap44/Spef2/Ift81/Dcdc2a/Arl13a/Avil/Fhdc1/Zmynd10/Dnah5/Cc2d2b/Rabl2/Prickle1/Dnah7a/Zfp423/Mcidas/Bbs10/Ccdc96/Ccdc113/Cfap206/Kif24/Spag16/Rp1/Wdr90/Mns1/Wdr54/Dusp23/Armc12/Tekt4/Dnaaf4/Tctn2/Cfap61/Stk36/Yap1/Ccdc63/Kcnq1/Erich3/Tmem107/Cntrob/Cfap69/Hap1/Foxj1/Cc2d2a	46
GO:0098984	CC	GO:0098984	neuron to neuron synapse	52/1659	444/22834	0.117117	1.61197	3.64489	0.000452828	0.0126565	0.0110585	Cdh2/Lrfn2/Map1b/Lrrtm2/Cap2/Sh3gl3/Snap47/Drp2/Grm5/Rgs7bp/Grik2/Syt7/Nrcam/Map1a/Grm3/Ephb2/Syngap1/Ptprf/Ptprz1/Dclk1/Actn2/Kalrn/Calca/Ntrk2/Lrfn4/Shisa6/Dlg5/Gap43/Dgki/Map2/Adcy8/Grip1/Cacna1c/Erbb4/Gria1/Tanc2/Dlg4/Bdnf/Slc6a9/Hspb1/Igsf9b/Arc/Scn8a/Camk2n1/Hspa8/Atp1b2/Tanc1/Lrfn3/Efnb3/Lrrtm3/Srcin1/Cabp1	52
GO:0021700	BP	GO:0021700	developmental maturation	46/1654	398/23040	0.115578	1.60998	3.4138	0.000965138	0.0386585	0.0340303	Edn1/Foxa1/Ednrb/Bhlha15/Grb14/Gldn/Ntn4/Pld6/Defb37/Cspg4/Nrcam/Map3k13/Cntnap1/Catsper2/Cdc20/Fbxo5/Irx5/Tgfb2/Calca/Pla2g10/Pparg/Sybu/Pth1r/Ccnb1/Atp6v0a4/Chrdl1/Erbb4/Nfatc4/Dlg4/Tal1/Ihh/Plcb1/Bcan/Adamts12/Cdh3/Dab2ip/Ccdc154/Hes5/Atp6v0e2/Tbx6/Epo/Fgfr3/Kif14/Gata3/Foxj1/Sox18	46
GO:1990351	CC	GO:1990351	transporter complex	52/1659	452/22834	0.115044	1.58344	3.50676	0.000685896	0.0159757	0.0139586	Akap6/Atp8b1/Kcnj1/Chrna2/Trpc3/Grik2/Kcnj15/Ano2/Stac3/Clcn2/Dpp10/Kcnd2/Trpc5/Trpc1/Catsper2/Wdr93/Kcnc2/Cachd1/Kcnk1/Shisa6/Kcnh1/Abcc8/Kcnk4/Kcnd1/Dpp6/Kcns1/Kcnk7/Cacna1c/Scn1b/Gria1/Scnn1b/Cacna2d4/Best3/Dlg4/Kcnq4/Cngb3/Ryr2/Scn8a/Ano1/Kcnj14/Scn4b/Trpc6/Kcnj3/Atp1b2/Best2/Kcnq1/Kcnab3/Cacna2d1/Cacna1b/Pkd1l1/Kcnh2/Cacng6	52
GO:0006935	BP	GO:0006935	chemotaxis	52/1654	458/23040	0.113537	1.58156	3.49606	0.00070876	0.0328983	0.0289597	Fgf16/Edn1/Pgf/Ednrb/Ifng/Defb48/Retnlg/Rtn4r/Il34/Robo3/Slit1/Sema5a/Sema3f/Lrp2/Ntf3/Fgf18/Cdh13/Ccn3/Sema3d/Sema3e/Tnfsf11/Hbegf/Cyp7b1/Tnfsf18/Sema4g/Adgra2/Sema6a/Ccl28/Apoa1/Saa3/Mtus1/Cxcl10/Rnase2b/Cxcr3/Lrtm2/Itgb2l/Xcr1/Ccr5/Prkca/Cxcr6/Hspb1/Pdgfa/Agtr1b/Ear6/Cxcr1/C3ar1/Tnfaip6/Tbr1/Fpr1/Ackr2/Ffar2/Hc	52
GO:0051347	BP	GO:0051347	positive regulation of transferase activity	48/1654	424/23040	0.113208	1.57697	3.33473	0.00118224	0.0454143	0.0399773	Edn1/Myc/C1qtnf9/Ifng/Tenm1/Prlr/Tyro3/Erbb2/Grm5/Il34/Ppp1r3g/Ntf3/Fgf18/Map3k13/Dscc1/Cenpe/Adipoq/Cdc20/Tnfsf11/Tgfb2/Ttbk1/Ntrk2/Nek2/Ect2/Apoa1/Ltf/Adra2b/Ajuba/Ddr2/Erbb4/Kitl/Plk1/Xrcc5/Gckr/Axin2/Pdgfa/Agtr1b/Dab2ip/Cd4/Gprc5b/Spatc1l/Ephb4/Epo/Fgfr3/Kif14/Srcin1/Aurkb/Mmd	48
GO:0042330	BP	GO:0042330	taxis	52/1654	460/23040	0.113043	1.57468	3.46241	0.000782799	0.034064	0.0299858	Fgf16/Edn1/Pgf/Ednrb/Ifng/Defb48/Retnlg/Rtn4r/Il34/Robo3/Slit1/Sema5a/Sema3f/Lrp2/Ntf3/Fgf18/Cdh13/Ccn3/Sema3d/Sema3e/Tnfsf11/Hbegf/Cyp7b1/Tnfsf18/Sema4g/Adgra2/Sema6a/Ccl28/Apoa1/Saa3/Mtus1/Cxcl10/Rnase2b/Cxcr3/Lrtm2/Itgb2l/Xcr1/Ccr5/Prkca/Cxcr6/Hspb1/Pdgfa/Agtr1b/Ear6/Cxcr1/C3ar1/Tnfaip6/Tbr1/Fpr1/Ackr2/Ffar2/Hc	52
GO:0030900	BP	GO:0030900	forebrain development	48/1654	426/23040	0.112676	1.56956	3.29984	0.00130512	0.0481426	0.042379	Cdh2/Rfx4/Nkx2-1/Ptchd1/Tyro3/Aldh1a3/Rtn4r/Dmrta2/Elavl4/Dnah5/Slit1/Nr2f1/Sema5a/Lrp2/Fgf8/Ephb2/Aqp1/Sema3e/Dclk1/Bhlhe22/Ntrk2/Pou3f1/Ghrh/Notch3/Ccdc85c/Bmp4/Slc1a2/Mecom/Lhx1/Erbb4/Tal2/Plcb1/Bcan/Btbd3/Dab2ip/Hsd3b2/Hes5/Lhx2/Plxna1/Atp1b2/Tbr1/Fgfr3/Kif14/Rtn4rl2/Lhx3/Tbx3/Hap1/Tsku	48
GO:0062023	CC	GO:0062023	collagen-containing extracellular matrix	45/1659	395/22834	0.113924	1.56802	3.18751	0.00184013	0.0311707	0.0272351	Efemp2/Timp3/Gpc5/Gpc6/Acta2/Scara3/Fbln2/Ntn4/Loxl2/Fbln5/Loxl4/Cspg4/Col4a6/Col4a5/Adamts5/Ltbp1/Wnt2/Vit/Ccn3/Smoc1/Vcan/Ptprz1/Krt1/Col19a1/Tgfb2/Col7a1/Mmrn1/Vtn/Adamts2/Timp1/Col24a1/Amelx/Ecm1/Eln/Vwa1/Muc2/Bcan/Zg16/Emilin1/Angptl6/Pzp/Prg4/Efemp1/Col4a3/Serpinh1	45
GO:0032279	CC	GO:0032279	asymmetric synapse	46/1659	404/22834	0.113861	1.56716	3.21937	0.00166778	0.0300738	0.0262767	Cdh2/Lrfn2/Map1b/Lrrtm2/Cap2/Sh3gl3/Snap47/Drp2/Grm5/Rgs7bp/Grik2/Nrcam/Map1a/Grm3/Syngap1/Ptprf/Ptprz1/Dclk1/Actn2/Kalrn/Ntrk2/Lrfn4/Shisa6/Dlg5/Gap43/Dgki/Map2/Adcy8/Grip1/Cacna1c/Erbb4/Gria1/Tanc2/Dlg4/Slc6a9/Hspb1/Arc/Scn8a/Camk2n1/Hspa8/Tanc1/Lrfn3/Efnb3/Lrrtm3/Srcin1/Cabp1	46
GO:0044782	BP	GO:0044782	cilium organization	48/1654	428/23040	0.11215	1.56223	3.26512	0.00143911	0.0497877	0.0438271	Nme8/Ablim3/Enkd1/Rfx4/Cfap44/Spef2/Ift81/Dcdc2a/Arl13a/Avil/Fhdc1/Zmynd10/Dnah5/Cc2d2b/Rabl2/Prickle1/Cep78/Dnah7a/Zfp423/Mcidas/Bbs10/Fam161b/Ccdc96/Ccdc113/Cfap206/Kif24/Spag16/Rp1/Wdr90/Mns1/Wdr54/Dusp23/Armc12/Tekt4/Dnaaf4/Tctn2/Cfap61/Stk36/Yap1/Ccdc63/Kcnq1/Erich3/Tmem107/Cntrob/Cfap69/Hap1/Foxj1/Cc2d2a	48
GO:0099572	CC	GO:0099572	postsynaptic specialization	49/1659	433/22834	0.113164	1.55756	3.27863	0.00137022	0.0299428	0.0261623	Cdh2/Lrfn2/Map1b/Lrrtm2/Cap2/Sh3gl3/Snap47/Drp2/Grm5/Rgs7bp/Grik2/Nrcam/Map1a/Kcnd2/Grm3/Syngap1/Ptprf/Ptprz1/Dclk1/Actn2/Kalrn/Ntrk2/Lrfn4/Lhfpl4/Shisa6/Dlg5/Gap43/Dgki/Map2/Adcy8/Grip1/Cacna1c/Erbb4/Gria1/Tanc2/Dlg4/Slc6a9/Hspb1/Igsf9b/Arc/Scn8a/Camk2n1/Hspa8/Tanc1/Lrfn3/Efnb3/Lrrtm3/Srcin1/Cabp1	49
GO:0034329	BP	GO:0034329	cell junction assembly	54/1654	486/23040	0.111111	1.54776	3.39417	0.000937151	0.0386585	0.0340303	Cdh2/Pkp2/Pof1b/Lrrtm2/Cldn10/Ptpn13/Flrt2/Cdh6/Rhod/Gpm6a/Amigo2/Tesk2/Cdh13/Ephb2/Gpm6b/Cntnap1/Cldn16/Actn2/Ntrk2/Lrfn4/Coro2b/Lhfpl4/Pcdhb16/Flrt1/Ect2/Pard3/Asic2/Dlg5/Lrrc24/Gap43/Ajuba/Erbb4/Gria1/Nrxn2/Cldn7/Lrtm2/Dlg4/Cux2/Bdnf/Prkca/Cldn3/Marveld3/Cdh17/Cdh3/Sdk2/Sdk1/Amigo3/Gpbar1/Icam5/Lrfn3/Efnb3/Lrrtm3/Gjc1/Srcin1	54

## Sheet: File 1g
Supplementary File 1g: DESeq2 results showing the significant (p<0.05) DEGs in the myeloid cell cluster from mouse lungs exposed to 5-day nose-only exposure to menthol-flavored ecig aerosol when compared to air control.
	baseMean	log2FoldChange	lfcSE	stat	pvalue	padj
Cxcl3	140.156	2.68441	0.796738	3.36925	0.000753721	0.034897
Tmem132b	177.915	1.82042	0.329957	5.51715	3.44545593583666e-08	3.29197653505848e-05
Dnah17	177.849	1.76111	0.434221	4.0558	4.99634107568226e-05	0.0075123
Intu	78.7246	1.70762	0.421411	4.05215	5.07491193045868e-05	0.0075123
Gm1604a	93.1564	1.55214	0.4297	3.61215	0.000303671	0.0217115
Ninj2	93.1744	1.52842	0.382771	3.99304	6.52325548960936e-05	0.00856491
Gm10851	129.826	1.51214	0.365412	4.13818	3.50068606936248e-05	0.00566034
Adgrv1	133.13	1.49143	0.287641	5.18503	2.15976061371988e-07	0.000141869
Cirbp	1045.44	1.37015	0.267657	5.11906	3.0706897356973e-07	0.000180296
Entpd3	95.8287	1.47931	0.366961	4.03125	5.54806128128493e-05	0.00757274
Ncam1	91.8087	1.4083	0.327298	4.30281	1.68642328545059e-05	0.00334421
Il1bos	74.0418	1.39887	0.418414	3.34328	0.000827946	0.0360682
Cfap43	374.599	1.38976	0.274476	5.06334	4.11975613507115e-07	0.000216493
Ceacam10	106.741	1.3761	0.38782	3.54831	0.000387715	0.0244005
Gm16599	382.827	1.37587	0.285298	4.82257	1.41723522397062e-06	0.000551672
Negr1	180.943	1.37305	0.357972	3.83564	0.000125237	0.0124173
Ifitm1	2864.79	1.33647	0.200289	6.67272	2.51109475474067e-11	1.31958029361622e-07
Smad3	630.872	1.31915	0.277919	4.74654	2.06927057944554e-06	0.000724934
Frmd5	456.129	1.29163	0.328357	3.93362	8.36744398602812e-05	0.0101333
Slc22a15	685.498	1.16969	0.261555	4.47206	7.74682962363468e-06	0.00203548
Gm16174	84.6739	1.15833	0.362463	3.19572	0.00139482	0.0472888
Wfdc17	2837.05	1.1578	0.219199	5.28197	1.27805528596231e-07	8.95490737030923e-05
Oasl1	161.902	1.14508	0.324076	3.53336	0.000410319	0.0255174
Rubcnl	302.478	1.10605	0.345252	3.2036	0.00135721	0.046922
Esr1	111.558	1.10602	0.30938	3.57495	0.000350295	0.02301
Clec1b	138.54	1.10098	0.282217	3.9012	9.57166001727879e-05	0.0105749
Jdp2	2316.49	1.0604	0.269613	3.93303	8.38818005134265e-05	0.0101333
Stat4	783.965	1.05796	0.251938	4.1993	2.67740930472706e-05	0.00453864
Ccrl2	1342.39	1.05321	0.238932	4.40797	1.04343606650485e-05	0.00255035
St3gal5	1424.38	1.04115	0.241026	4.31964	1.56284794897454e-05	0.00334421
Anxa11os	150.344	1.03978	0.324936	3.19994	0.00137455	0.0471387
Pfkfb3	1260.96	1.03852	0.257411	4.03446	5.47287268955871e-05	0.00757274
Epcam	372.692	1.03649	0.293115	3.53612	0.000406048	0.0254021
Lst1	4193.29	1.02401	0.221392	4.62535	3.73975110727128e-06	0.00119036
Txndc16	402.472	1.0153	0.187298	5.42078	5.93404908489082e-08	4.48125841227129e-05
Tiam2	422.049	1.00815	0.272776	3.6959	0.000219109	0.0171853
Neurl3	1175.74	1.00232	0.169369	5.91796	3.25964944874186e-09	5.54539838813209e-06
Ccdc57	275.04	1.0023	0.264096	3.79522	0.00014751	0.0132919
Slc28a2	138.74	1.00194	0.311044	3.22122	0.00127648	0.0459593
Ptpn22	657.196	1.00063	0.292761	3.41791	0.00063105	0.032013
Arhgap15	13843.8	0.992566	0.177333	5.5972	2.17842089189329e-08	2.28952035737985e-05
Trp53inp1	817.579	0.990214	0.286816	3.45244	0.000555548	0.0296386
Slfn4	640.083	0.979636	0.309262	3.16766	0.00153672	0.0498486
Ralgps1	502.923	0.973722	0.241127	4.0382	5.38620117340414e-05	0.00757274
Slc2a6	330.244	0.97265	0.225867	4.30631	1.66003923845021e-05	0.00334421
Prr7	209.582	0.960939	0.276144	3.47985	0.000501689	0.0285516
Pde2a	403.275	0.959074	0.297926	3.21917	0.00128564	0.0459593
Ssbp2	560.539	0.936033	0.270855	3.45585	0.000548565	0.0294913
Pglyrp1	3279.22	0.932228	0.213703	4.36226	1.28723811085901e-05	0.00294106
Elmsan1	3468.21	0.925423	0.259544	3.56558	0.000363054	0.0235537
Slc25a33	695.443	0.916743	0.278391	3.29301	0.000991203	0.0402222
Sik1	2347.73	0.916066	0.227177	4.03239	5.52127128195591e-05	0.00757274
Hist1h1c	1349.53	0.915397	0.168901	5.41972	5.96932614384378e-08	4.48125841227129e-05
Palm	203.851	0.914151	0.264326	3.45843	0.000543339	0.0294913
Dusp2	1051.45	0.913725	0.185418	4.92793	8.31073009899513e-07	0.000363941
S100a6	18480.8	0.905321	0.229573	3.9435	8.03005298650224e-05	0.00992892
Ets2	3164	0.901554	0.262736	3.4314	0.000600471	0.0316318
Arrdc3	913.25	0.892832	0.263601	3.38706	0.000706454	0.0335747
Il1r2	10019.3	0.889713	0.206412	4.31038	1.62977573652625e-05	0.00334421
Trpm2	696.226	0.89141	0.228626	3.89899	9.6593182405502e-05	0.0105749
Ralgapa1	3670.96	0.88853	0.247039	3.59672	0.000322255	0.0222995
Nt5c2	2099.83	0.888283	0.192299	4.61928	3.85083188438421e-06	0.00119036
Rdh11	310.896	0.885599	0.277235	3.1944	0.00140122	0.0473533
Pik3ip1	229.039	0.882425	0.270679	3.26004	0.00111397	0.0435109
Atp1a3	760.325	0.881103	0.231706	3.80268	0.000143139	0.0132522
Cux1	4366.08	0.879304	0.184797	4.75821	1.95314637566278e-06	0.000707847
Igf1r	4732.86	0.874936	0.22554	3.87929	0.000104762	0.0108107
Arhgef18	1399.95	0.866124	0.223211	3.8803	0.00010433	0.0108107
4732465J04Rik	729.927	0.861596	0.222122	3.87893	0.000104919	0.0108107
Cmss1	7477.13	0.861113	0.143425	6.00391	1.92617304238759e-09	5.0610196688734e-06
Nos1ap	343.162	0.857163	0.251346	3.41029	0.000648935	0.0320202
Sag	237.097	0.853821	0.235927	3.61901	0.000295731	0.0212886
Gsn	2310.28	0.84796	0.148838	5.6972	1.21789792127297e-08	1.42223412806432e-05
Zfand4	932.619	0.845533	0.25375	3.33214	0.000861794	0.036522
Gpr65	603.526	0.835716	0.260683	3.20587	0.00134655	0.046922
2310010J17Rik	241.009	0.831473	0.232413	3.57756	0.000346813	0.0229245
Slc2a1	663.274	0.830613	0.220793	3.76195	0.000168594	0.0141754
Adam19	814.846	0.829151	0.173357	4.7829	1.7278465263713e-06	0.00064856
Cd52	14109.1	0.827593	0.145203	5.69956	1.20120190899623e-08	1.42223412806432e-05
Csf3r	6050.45	0.827015	0.18109	4.56688	4.95045984073028e-06	0.00144912
Lmnb1	5690.44	0.824354	0.236913	3.47957	0.000502217	0.0285516
Nlrp12	666.143	0.815595	0.215775	3.77984	0.000156932	0.0137446
Mirt1	1073.48	0.815199	0.187279	4.35285	1.34376992297374e-05	0.0030049
AU019990	611.677	0.813785	0.233574	3.48406	0.000493864	0.0285516
H2-Q10	1024.11	0.811924	0.207342	3.91587	9.00794896449143e-05	0.0104037
Fbxo31	915.822	0.811383	0.223299	3.63361	0.000279479	0.0206854
AY036118	1156.66	0.810974	0.123234	6.58075	4.680897833888e-11	1.63987454113876e-07
Lpcat2	1260.03	0.808821	0.158998	5.08698	3.63802468038657e-07	0.00020124
Gpr132	1035.68	0.807675	0.241129	3.34956	0.000809413	0.0360682
Chrm3	289.623	0.797737	0.237575	3.35783	0.000785569	0.0357936
A330023F24Rik	1080.85	0.793172	0.237943	3.33345	0.00085775	0.0364978
Limd2	1511.53	0.792034	0.178051	4.44835	8.65329101126283e-06	0.0022182
Cass4	1293.41	0.789082	0.230275	3.4267	0.000610966	0.0316318
Chst11	2333.03	0.784088	0.245303	3.19641	0.00139149	0.0472888
Dgkg	715.881	0.781792	0.238314	3.28051	0.0010362	0.0415667
Tctex1d2	448.274	0.780855	0.171003	4.56632	4.96367435462973e-06	0.00144912
Trub2	360.889	0.780824	0.207236	3.7678	0.00016469	0.0139588
Rab11fip4	143.633	0.780111	0.239093	3.26279	0.00110321	0.0435109
Ctse	218.437	0.777023	0.238353	3.25997	0.00111424	0.0435109
Cwc25	882.998	0.77523	0.193865	3.9988	6.36633986944935e-05	0.00846965
Ptgs2	2064.23	0.772672	0.236863	3.26211	0.00110588	0.0435109
Klf3	4830.15	0.7686	0.210876	3.6448	0.000267602	0.0200404
Sgms1	6605.9	0.764678	0.22363	3.41939	0.000627611	0.032013
4930444A19Rik	275.714	0.763106	0.227289	3.35743	0.00078671	0.0357936
Dennd4a	15459.5	0.751559	0.191705	3.92039	8.84075982625271e-05	0.0104037
Sorl1	4738.35	0.743435	0.207405	3.58446	0.000337783	0.0226121
Smim3	1048.97	0.743178	0.152348	4.87816	1.07080430935737e-06	0.000432852
Cyth1	4799.08	0.741502	0.192282	3.85632	0.000115107	0.0115771
Il18rap	968.946	0.735698	0.215506	3.41381	0.000640607	0.0320202
Cyfip2	941.173	0.736876	0.204573	3.60202	0.000315753	0.022173
Plbd1	2613.04	0.735712	0.190098	3.87017	0.00010876	0.0110977
Usp38	896.39	0.734112	0.174383	4.20978	2.55624810218984e-05	0.00440429
Stim2	1399.82	0.733504	0.193259	3.79544	0.000147384	0.0132919
Ptprj	5896.6	0.726817	0.226034	3.21553	0.00130206	0.0462471
Tbc1d8	1131.48	0.724328	0.201766	3.58995	0.000330743	0.0222995
Uvrag	5174.78	0.723701	0.205287	3.52531	0.000422995	0.0257661
Sik3	6561.53	0.723437	0.186054	3.88832	0.000100939	0.0108107
Gm31814	254.582	0.7221	0.216262	3.339	0.000840791	0.0360682
Pip5k1b	1852.22	0.720037	0.210635	3.41842	0.000629869	0.032013
Spata13	558.874	0.714717	0.18774	3.80695	0.000140691	0.0132369
Hs6st1	1045.64	0.712887	0.223782	3.18564	0.00144436	0.0481912
Rbks	663.503	0.711974	0.198808	3.58121	0.000342003	0.0227497
Cd300ld	1913.73	0.711851	0.179156	3.97335	7.08678414452041e-05	0.00908318
Fmnl2	2069.36	0.711417	0.188395	3.7762	0.000159236	0.0138312
4932438A13Rik	2143.11	0.707755	0.204753	3.45664	0.000546962	0.0294913
Cnn2	1542.06	0.702552	0.157077	4.47264	7.72585288791375e-06	0.00203548
Fam114a1	472.512	0.702336	0.21809	3.22039	0.00128017	0.0459593
Emb	3924.61	0.700552	0.172819	4.05368	5.0418136415221e-05	0.0075123
Il1rap	2848.17	0.690568	0.194219	3.55562	0.000377095	0.024032
Gfod1	1400.5	0.700425	0.173511	4.03677	5.4192803846388e-05	0.00757274
Tut4	1008.7	0.699444	0.192916	3.62564	0.000288243	0.0210378
Nudt4	1683.14	0.697341	0.208724	3.34098	0.000834838	0.0360682
Ifitm2	8155.75	0.692612	0.200303	3.45782	0.000544559	0.0294913
Mphosph6	195.751	0.687505	0.20743	3.3144	0.000918409	0.0383035
Rcsd1	1435.34	0.686394	0.213764	3.211	0.00132276	0.0464646
Ltb4r1	482.44	0.682061	0.184314	3.70053	0.000215153	0.0170019
Prkcb	2491.81	0.678609	0.170068	3.99023	6.60092995145287e-05	0.00856491
Slfn1	832.304	0.67731	0.18462	3.66866	0.000243822	0.0185694
Aif1	691.298	0.672067	0.211487	3.17782	0.00148388	0.0490427
Lbr	1037.77	0.671577	0.196625	3.41552	0.000636606	0.032013
Clip1	1623.33	0.671408	0.183781	3.6533	0.000258892	0.0195752
Prim2	920.376	0.668735	0.205759	3.25008	0.00115371	0.0441
Itgam	2692.13	0.661615	0.201391	3.28523	0.001019	0.0410335
Gpr35	519.459	0.659254	0.188185	3.50323	0.000459657	0.0274488
Gm26887	284.632	0.658674	0.203795	3.23204	0.00122909	0.045485
Pilrb2	602.092	0.658363	0.154597	4.25858	2.05725652922993e-05	0.00393123
Gm12216	344.746	0.656943	0.184912	3.55274	0.000381245	0.0241379
Smchd1	2653.12	0.65399	0.152723	4.2822	1.85052921815658e-05	0.00360168
Rbm47	4140.81	0.651231	0.187488	3.47346	0.000513801	0.0287237
Malt1	2919.94	0.647213	0.146185	4.42737	9.53904788696836e-06	0.00238703
Rasgrp4	727.001	0.638319	0.156399	4.08136	4.47727299669916e-05	0.00692002
Cyp4f18	2757.49	0.637613	0.166388	3.83208	0.000127062	0.0124806
Ogfrl1	1590.96	0.63495	0.170387	3.72653	0.000194136	0.0156952
Wnk1	6798.97	0.62846	0.180665	3.47859	0.00050405	0.0285516
Ksr1	859.193	0.62429	0.177124	3.5246	0.000424123	0.0257661
AB124611	1285.75	0.622388	0.192363	3.23549	0.00121436	0.0453371
Wbp1l	1309.36	0.622125	0.177077	3.5133	0.000442585	0.0267331
D16Ertd472e	813.009	0.620148	0.184924	3.35353	0.000797878	0.0359901
St3gal6	1096.43	0.619508	0.17798	3.48077	0.000499982	0.0285516
Chd7	3583.62	0.615291	0.170846	3.60144	0.000316456	0.022173
Kdm7a	3405.09	0.612394	0.189786	3.22676	0.00125201	0.0459593
Hmgb2	5963.41	0.605814	0.15447	3.92189	8.78585039279009e-05	0.0104037
Hivep1	983.121	0.604597	0.187562	3.22346	0.00126652	0.0459593
Ptpn18	2184.04	0.604313	0.178637	3.38291	0.000717234	0.0336524
Atp8b4	3810.23	0.602435	0.158273	3.8063	0.00014106	0.0132369
Hdac9	910.54	0.591319	0.183524	3.22203	0.00127288	0.0459593
Pilra	1934.85	0.590362	0.148732	3.9693	7.20853371955188e-05	0.00912791
Tmem156	776.494	0.589264	0.158423	3.71956	0.000199567	0.016011
Cmip	9278.33	0.578742	0.156787	3.69126	0.000223149	0.0173726
Slc9a9	2448.38	0.576249	0.167951	3.43106	0.000601223	0.0316318
Vav3	3728.08	0.575545	0.149293	3.85515	0.000115661	0.0115771
Gtdc1	2076.48	0.568316	0.132033	4.30434	1.67483777510814e-05	0.00334421
Napsa	2698.02	0.56742	0.163195	3.47695	0.000507152	0.0285516
Cx3cr1	1020.06	0.562399	0.172254	3.26493	0.0010949	0.0434241
Hcst	1550.24	0.561345	0.164328	3.416	0.000635477	0.032013
Atrn	1411.9	0.55943	0.174176	3.21187	0.00131876	0.0464646
Casp3	534.747	0.558241	0.169905	3.2856	0.00101766	0.0410335
Trim11	493.988	0.55275	0.171109	3.23039	0.0012362	0.0455876
Pip4k2a	6071.09	0.55037	0.172356	3.19322	0.00140695	0.0473944
Def6	1124.7	0.547614	0.163999	3.33912	0.000840428	0.0360682
Camk1d	11970.1	0.547301	0.110762	4.94124	7.76254580846958e-07	0.000354715
Coro1a	9199.11	0.545545	0.1443	3.78062	0.000156437	0.0137446
Fgd3	509.239	0.542625	0.154679	3.50807	0.000451378	0.0271085
Fbxo11	3465.22	0.542196	0.163003	3.3263	0.00088007	0.0370097
Epb41	2234.26	0.536873	0.160546	3.34404	0.000825664	0.0360682
Tbc1d1	1082.39	0.53635	0.131026	4.09345	4.24999045921769e-05	0.00666678
Fus	4180.02	0.532895	0.154099	3.45814	0.000543915	0.0294913
Dusp16	3131.58	0.531892	0.14817	3.58975	0.000330992	0.0222995
Stap1	1115.67	0.529137	0.16555	3.19624	0.00139233	0.0472888
Zfp652	1327.44	0.526506	0.164265	3.20521	0.00134962	0.046922
Sh3bp5	1197.78	0.525737	0.150557	3.49196	0.00047949	0.0281533
Cdk8	1511.46	0.517173	0.13604	3.80163	0.000143745	0.0132522
Slc38a2	4338.89	0.513267	0.142808	3.59411	0.000325504	0.0222995
Kctd12	3086.25	0.511339	0.15373	3.32621	0.000880344	0.0370097
Ankrd44	7792.87	0.507855	0.132639	3.82886	0.000128739	0.0125282
Gmfg	4487.03	0.49555	0.156133	3.17389	0.0015041	0.0494002
Itpkb	2112.12	0.493746	0.126018	3.91806	8.92637088205873e-05	0.0104037
H3f3b	17948.9	0.49219	0.147284	3.34177	0.000832462	0.0360682
Babam2	3080.89	0.484776	0.136106	3.56176	0.000368371	0.023752
E230029C05Rik	1206.27	0.480609	0.140126	3.42984	0.00060394	0.0316318
Cd24a	1709.42	0.476413	0.150288	3.16999	0.00152443	0.0497572
Gm26740	4443.99	0.468888	0.123572	3.79445	0.000147969	0.0132919
Gm42418	59761.3	0.467057	0.110124	4.24117	2.22356853704523e-05	0.00409995
Ncf2	9441.38	0.464919	0.140698	3.30437	0.0009519	0.0389279
Selplg	4790.98	0.456822	0.144087	3.17045	0.00152201	0.0497572
Rgs2	4727.36	0.456028	0.119202	3.82569	0.000130408	0.0125742
Arih2	1787.09	0.452457	0.140349	3.22381	0.00126497	0.0459593
Hexb	2138.4	0.440887	0.122815	3.58984	0.000330881	0.0222995
Lyst	3454.83	0.432039	0.132887	3.25119	0.00114924	0.0441
Sirpb1b	1587.09	0.432008	0.13561	3.18567	0.00144422	0.0481912
Lsp1	10895.7	0.423062	0.130071	3.25254	0.0011438	0.0441
Gng2	1757.92	0.419428	0.13091	3.20393	0.00135565	0.046922
Syk	6948.37	0.41879	0.116632	3.59071	0.000329779	0.0222995
Oga	1476.6	0.412643	0.124774	3.30712	0.00094262	0.0388507
Psmb8	2375.53	0.407364	0.119629	3.40522	0.000661103	0.0324682
Arhgap45	2334.65	0.405525	0.12128	3.34372	0.000826642	0.0360682
Lars2	2452.55	0.403812	0.121721	3.31753	0.000908187	0.0380281
Vasp	2956.73	0.402363	0.109574	3.67205	0.000240614	0.0184588
Elmo1	7226.63	0.361765	0.107438	3.36719	0.000759373	0.0350044
Slc12a6	2875.67	0.321599	0.101291	3.17499	0.00149843	0.0493682
Dip2c	4109.09	-0.412808	0.126081	-3.27415	0.0010598	0.0421914
Slc38a6	1030.68	-0.42043	0.132694	-3.16841	0.00153276	0.0498486
Fkbp1a	1776.71	-0.422485	0.125606	-3.36356	0.000769433	0.0353133
Cd93	950.99	-0.445198	0.13106	-3.3969	0.000681527	0.0331614
Tmbim1	1469.7	-0.456624	0.14272	-3.19944	0.00137694	0.0471387
Ptpn12	7819.65	-0.467321	0.144503	-3.23398	0.00122078	0.0453371
Pdlim1	1701.47	-0.483658	0.149114	-3.24355	0.0011805	0.0447907
Prkca	1036.24	-0.485017	0.151566	-3.20004	0.00137409	0.0471387
Adgrf5	1139.96	-0.500164	0.147419	-3.39282	0.000691773	0.0331988
Dst	5693.96	-0.500965	0.140395	-3.56827	0.00035935	0.0234582
Gmds	3381.36	-0.50577	0.138811	-3.64359	0.000268858	0.0200404
Abcc5	2261.77	-0.510299	0.155671	-3.27807	0.0010452	0.0417682
Mitf	3170.56	-0.516375	0.149451	-3.45515	0.00054998	0.0294913
Mertk	5666.04	-0.517074	0.161071	-3.21023	0.0013263	0.0464646
Atp6v0d2	6687.22	-0.517523	0.156424	-3.30847	0.000938085	0.038816
Dpagt1	367.331	-0.519933	0.161464	-3.22011	0.0012814	0.0459593
Plet1	9713.51	-0.522959	0.164529	-3.17853	0.00148026	0.0490427
Il6st	915.25	-0.530782	0.125475	-4.23019	2.33494355630616e-05	0.00416439
P2ry14	1038.13	-0.549489	0.122288	-4.4934	7.00934232127328e-06	0.00197269
Wwtr1	1869.38	-0.556788	0.172059	-3.23602	0.00121207	0.0453371
Htr2c	4069.4	-0.574658	0.113793	-5.05005	4.41705513340191e-07	0.000221063
Ppid	366.67	-0.580078	0.178483	-3.25004	0.0011539	0.0441
Abcd2	1533.39	-0.581234	0.163475	-3.55548	0.000377287	0.024032
Cdh5	883.474	-0.586403	0.168676	-3.4765	0.000508006	0.0285516
Spp1	1893.08	-0.594262	0.175734	-3.3816	0.000720649	0.0336623
Dab2	4012.53	-0.597054	0.164806	-3.62276	0.000291475	0.0211269
Rusc2	283.036	-0.597581	0.184487	-3.23915	0.00119888	0.0453246
Emilin1	524.561	-0.60899	0.19082	-3.19144	0.00141567	0.0475359
Cidec	2270.69	-0.626495	0.168776	-3.712	0.000205629	0.0163724
Spns1	718.826	-0.640857	0.163943	-3.90903	9.26677538356207e-05	0.0104725
Cyp4b1	420.682	-0.642469	0.191651	-3.35228	0.000801487	0.0359984
Pwwp3a	537.301	-0.642727	0.199493	-3.2218	0.00127388	0.0459593
Patj	2301.83	-0.648398	0.196162	-3.30543	0.000948316	0.0389279
Pmp22	451.511	-0.649496	0.173515	-3.74318	0.000181708	0.0149199
Mmd	771.313	-0.652969	0.188832	-3.45794	0.000544331	0.0294913
Plcb1	9766.66	-0.670148	0.163552	-4.09748	4.17678805171252e-05	0.00665122
Manf	1558.7	-0.678526	0.18821	-3.60515	0.000311972	0.0221542
Prx	343.73	-0.680699	0.199486	-3.41226	0.000644259	0.0320202
Eng	731.047	-0.684815	0.196401	-3.48682	0.000488801	0.0285405
Mcam	668.451	-0.687381	0.198875	-3.45635	0.000547537	0.0294913
Creb3l2	605.643	-0.698538	0.186259	-3.75036	0.000176578	0.0146129
Rgl1	725.272	-0.703192	0.199151	-3.53095	0.000414064	0.0255989
Krt19	2336.85	-0.708459	0.209395	-3.38336	0.00071606	0.0336524
Gca	422.068	-0.715909	0.211432	-3.386	0.00070919	0.0335747
Crip2	651.239	-0.718441	0.211703	-3.39363	0.000689734	0.0331988
Prag1	440.287	-0.718624	0.20379	-3.5263	0.000421408	0.0257661
Gpr160	288.333	-0.719036	0.220626	-3.25907	0.00111779	0.0435109
Egr2	385.698	-0.7228	0.216301	-3.34163	0.000832871	0.0360682
Olr1	3107.92	-0.722928	0.219515	-3.2933	0.000990185	0.0402222
Esam	394.052	-0.738461	0.169888	-4.34674	1.38177395925933e-05	0.00302551
Cacybp	1020.62	-0.742158	0.217557	-3.41133	0.000646466	0.0320202
Tspan32	369.654	-0.748138	0.199377	-3.75237	0.000175169	0.0146113
Phldb2	166.345	-0.756128	0.22837	-3.31098	0.000929692	0.0386208
Icam2	425.408	-0.757667	0.235635	-3.21543	0.00130249	0.0462471
Dnajb9	1241.67	-0.757687	0.195327	-3.87907	0.000104855	0.0108107
Tmem100	1095.03	-0.776568	0.232858	-3.33493	0.000853196	0.0364516
Hspa8	18148.5	-0.78257	0.232236	-3.36972	0.000752439	0.034897
Ubfd1	237.921	-0.799791	0.22846	-3.5008	0.000463868	0.0275438
Myzap	280.053	-0.811084	0.223503	-3.62897	0.000284555	0.0209138
Ctla2a	1975.1	-0.814106	0.137845	-5.90595	3.50624165361426e-09	5.54539838813209e-06
Tc2n	708.461	-0.817174	0.204252	-4.0008	6.3127902785454e-05	0.00846965
Kitl	360.89	-0.819845	0.257802	-3.18013	0.00147207	0.0489605
Thbd	944.093	-0.820894	0.196736	-4.17257	3.01176777011794e-05	0.00502439
Rhoj	297.083	-0.824142	0.198214	-4.15784	3.21267483782912e-05	0.00527581
Nova2	138.726	-0.832043	0.248812	-3.34407	0.000825594	0.0360682
Fbxl7	183.657	-0.841082	0.247727	-3.3952	0.000685788	0.0331988
Dmd	269.076	-0.841966	0.228941	-3.67765	0.000235389	0.0181908
Mavs	456.111	-0.861294	0.251246	-3.42809	0.000607845	0.0316318
Adgrl2	1301.43	-0.865955	0.173543	-4.98986	6.04237228889933e-07	0.000288661
Tfec	1275.08	-0.878174	0.148909	-5.89737	3.69341472092528e-09	5.54539838813209e-06
Gm48293	167.177	-0.898936	0.265268	-3.38878	0.000702044	0.0335386
Pparg	4173.41	-0.901914	0.22331	-4.03884	5.37158945695798e-05	0.00757274
Serpinh1	122.657	-0.903449	0.258438	-3.4958	0.000472637	0.0279068
Myc	279.107	-0.907251	0.27928	-3.24854	0.00116001	0.0441728
Ick	214.342	-0.916654	0.209994	-4.36515	1.27033119557701e-05	0.00294106
Acaa1b	1387.09	-0.940329	0.222304	-4.22992	2.33776597099742e-05	0.00416439
Jcad	257.32	-0.955147	0.253244	-3.77165	0.00016217	0.0138603
Slc9a3r2	649.758	-0.991454	0.306331	-3.23655	0.00120984	0.0453371
Gm41307	396.947	-1.00278	0.298883	-3.35509	0.000793385	0.0359417
E330020D12Rik	360.029	-1.02718	0.275301	-3.73113	0.000190624	0.0155307
Smad6	453.177	-1.02798	0.220768	-4.65637	3.2183355309768e-06	0.00106442
Aqp1	912.089	-1.03432	0.189245	-5.46549	4.61619842593572e-08	4.04302045471536e-05
Egfem1	4037.37	-1.07049	0.155809	-6.87057	6.39466722795346e-12	6.72079525657908e-08
Coro2b	301.042	-1.07228	0.280658	-3.82059	0.000133133	0.0127203
Bcam	197.773	-1.08464	0.256748	-4.22453	2.39442694523782e-05	0.00419424
Ackr3	137.907	-1.0916	0.319052	-3.42137	0.000623056	0.032013
Chordc1	454.97	-1.0918	0.318613	-3.42671	0.000610943	0.0316318
Timp3	993.99	-1.09345	0.234902	-4.65493	3.24084646873804e-06	0.00106442
Sema3e	768.439	-1.09508	0.280822	-3.89954	9.63769035274226e-05	0.0105749
Pcdh1	179.583	-1.13553	0.348609	-3.25733	0.00112466	0.0436167
Ahsa2	202.244	-1.14539	0.293006	-3.9091	9.26416367647947e-05	0.0104725
Sox17	92.3727	-1.21766	0.376424	-3.23482	0.0012172	0.0453371
Ednrb	195.823	-1.29017	0.340547	-3.78854	0.000151535	0.0134969
Ecm1	267.274	-1.31416	0.348436	-3.77159	0.000162209	0.0138603
Ltbp1	84.6986	-1.33272	0.398205	-3.34683	0.000817428	0.0360682
Hspb1	263.587	-1.40769	0.275046	-5.118	3.08785411950252e-07	0.000180296
Clu	128.255	-1.44432	0.449851	-3.21067	0.00132426	0.0464646
Wfdc10	275.902	-1.44612	0.3649	-3.96307	7.39932382035073e-05	0.00925796
Prss23	143.332	-1.47856	0.379695	-3.89408	9.8572953119547e-05	0.0106804
Tbx3	194.822	-1.51105	0.355289	-4.25301	2.10916998819882e-05	0.00395846
Cgnl1	69.604	-1.58298	0.465702	-3.39914	0.000675988	0.0330448
Cd209d	107.584	-1.59896	0.366298	-4.36519	1.27010284361241e-05	0.00294106
Edn1	159.573	-1.98257	0.441581	-4.4897	7.13248102387818e-06	0.00197269
March4	70.5445	-2.78575	0.571009	-4.87865	1.06813787269691e-06	0.000432852

## Sheet: File 1h
Supplementary File 1h: GO analyses results of the (a) upregulated DEGs (log2fold change > 0.5) and (b) downregulated DEGs (log2fold change < -0.5) in the myeloid cell cluster from mouse lungs exposed to 5-day nose-only exposure to menthol-flavored e-cig aerosols when compared to air control.
(a) Upregulated DEGs
	ONTOLOGY	ID	Description	GeneRatio	BgRatio	RichFactor	FoldEnrichment	zScore	pvalue	p.adjust	qvalue	geneID	Count
GO:0035744	BP	GO:0035744	T-helper 1 cell cytokine production	2025-06-01	11/23040	0.545455	6.20606	5.36102	0.000143335	0.0114668	0.0102237	Il12b/Arid5a/Il12a/Il18rap/Slamf1/Il1b	6
GO:0060022	BP	GO:0060022	hard palate development	2025-05-01	10/23040	0.5	5.68889	4.60365	0.00090187	0.0360748	0.0321638	Itgb8/Tbx1/Mmp25/Itgb6/Fzd2	5
GO:1990454	CC	GO:1990454	L-type voltage-gated calcium channel complex	2044-05-01	10/22834	0.5	5.58562	4.54775	0.000981312	0.0191356	0.0168717	Cacna1d/Cacnb2/Cacng1/Cacng8/Cacng6	5
GO:0031838	CC	GO:0031838	haptoglobin-hemoglobin complex	2044-05-01	11/22834	0.454545	5.07783	4.24164	0.00166673	0.0295466	0.026051	Hp/Hba-a1/Hba-a2/Hbb-bt/Hbb-b1	5
GO:0008046	MF	GO:0008046	axon guidance receptor activity	2026-05-01	11/22548	0.454545	5.05878	4.23056	0.00169526	0.0319761	0.0287055	Ephb3/Gfra3/Epha7/Hmcn2/Robo2	5
GO:0010572	BP	GO:0010572	positive regulation of platelet activation	2025-06-01	14/23040	0.428571	4.87619	4.50339	0.000738924	0.0322853	0.0287851	Jak2/Gp5/Gp9/Gp1ba/Svep1/Ptprj	6
GO:0032328	BP	GO:0032328	alanine transport	2025-07-01	17/23040	0.411765	4.68497	4.71799	0.000353287	0.018654	0.0166316	Slc38a2/Slc38a4/Slc6a14/Slc36a3/Slc7a5/Slc1a4/Slc7a10	7
GO:0005583	CC	GO:0005583	fibrillar collagen trimer	2044-05-01	12/22834	0.416667	4.65468	3.97062	0.00264759	0.0397138	0.0350153	Col1a2/Lum/Col5a3/Col1a1/Col5a1	5
GO:0098643	CC	GO:0098643	banded collagen fibril	2044-05-01	12/22834	0.416667	4.65468	3.97062	0.00264759	0.0397138	0.0350153	Col1a2/Lum/Col5a3/Col1a1/Col5a1	5
GO:0072378	BP	GO:0072378	blood coagulation, fibrin clot formation	2025-06-01	15/23040	0.4	4.55111	4.27061	0.00114031	0.0397358	0.0354279	Fbln1/F8/Gp5/Gp9/Gp1ba/Itgb3	6
GO:0008569	MF	GO:0008569	minus-end-directed microtubule motor activity	2026-08-01	20/22548	0.4	4.45173	4.85226	0.000196597	0.00691058	0.00620376	Dnah5/Dnah7a/Dnah1/Dnah9/Dnah12/Dnah14/Dnah6/Dnah17	8
GO:0070486	BP	GO:0070486	leukocyte aggregation	2025-07-01	18/23040	0.388889	4.42469	4.51197	0.000534393	0.0254069	0.0226524	Sema4d/Rac2/Adam8/Thbs1/S100a8/S100a9/Il1b	7
GO:1902514	BP	GO:1902514	regulation of calcium ion transmembrane transport via high voltage-gated calcium channel	2025-07-01	18/23040	0.388889	4.42469	4.51197	0.000534393	0.0254069	0.0226524	Fbxo11/Cacna1d/Cacnb2/Sestd1/Cacng1/Nppa/Cacng6	7
GO:0002523	BP	GO:0002523	leukocyte migration involved in inflammatory response	2025-10-01	26/23040	0.384615	4.37607	5.34665	3.8297861858456e-05	0.00435064	0.00387897	Jam3/Ninj1/Ppbp/Ptn/Adam8/S100a8/S100a9/Trim55/Slamf1/Itgam	10
GO:0010752	BP	GO:0010752	regulation of cGMP-mediated signaling	2025-06-01	16/23040	0.375	4.26667	4.05746	0.00168958	0.0497924	0.0443942	Pde10a/Nppc/Pde11a/Thbs1/Nppa/Pde2a	6
GO:0032426	CC	GO:0032426	stereocilium tip	2044-08-01	21/22834	0.380952	4.25571	4.68014	0.000285182	0.00758325	0.00668609	Homer2/Tmc1/Pdzd7/Ush1c/Espnl/Lhfpl5/Coro1a/Tmc2	8
GO:0061577	BP	GO:0061577	calcium ion transmembrane transport via high voltage-gated calcium channel	2025-07-01	19/23040	0.368421	4.19181	4.32048	0.00078224	0.03366	0.0300108	Fbxo11/Cacna1d/Cacnb2/Sestd1/Cacng1/Nppa/Cacng6	7
GO:0050910	BP	GO:0050910	detection of mechanical stimulus involved in sensory perception of sound	2025-08-01	22/23040	0.363636	4.13737	4.57008	0.000364541	0.018654	0.0166316	Adgrv1/Tmc1/Slc12a2/Pdzd7/Pjvk/Lhfpl5/Tmc2/Chrna9	8
GO:0098644	CC	GO:0098644	complex of collagen trimers	2044-07-01	19/22834	0.368421	4.11572	4.2601	0.000873358	0.0179421	0.0158194	Col1a2/Col4a4/Lum/Col5a3/Col1a1/Col4a3/Col5a1	7
GO:0001637	MF	GO:0001637	G protein-coupled chemoattractant receptor activity	2026-09-01	25/22548	0.36	4.00655	4.72585	0.000202138	0.00691058	0.00620376	Ccr7/Cxcr5/Gpr35/Ccrl2/Ccr4/Xcr1/Ccr3/Cx3cr1/Gpr75	9
GO:0004950	MF	GO:0004950	chemokine receptor activity	2026-09-01	25/22548	0.36	4.00655	4.72585	0.000202138	0.00691058	0.00620376	Ccr7/Cxcr5/Gpr35/Ccrl2/Ccr4/Xcr1/Ccr3/Cx3cr1/Gpr75	9
GO:0072376	BP	GO:0072376	protein activation cascade	2025-07-01	20/23040	0.35	3.98222	4.14173	0.00111272	0.0397358	0.0354279	Fbln1/F8/Gp5/F12/Gp9/Gp1ba/Itgb3	7
GO:0008381	MF	GO:0008381	mechanosensitive monoatomic ion channel activity	2026-06-01	17/22548	0.352941	3.92799	3.79454	0.00270755	0.0470168	0.0422079	Tmc1/Tmc7/Tmc5/Kcnk4/Tmc2/Tmc3	6
GO:0008356	BP	GO:0008356	asymmetric cell division	2025-07-01	21/23040	0.333333	3.79259	3.97424	0.00154346	0.0479281	0.042732	Fgf13/Etv5/Pou5f1/Pax6/Tead3/Stra8/Zbtb16	7
GO:0005858	CC	GO:0005858	axonemal dynein complex	2044-09-01	27/22834	0.333333	3.72374	4.44026	0.000382278	0.00972089	0.00857083	Dnah5/Dnah7a/Dnah1/Dnal1/Dnah9/Ccdc65/Dnah12/Dnah6/Dnah17	9
GO:0005242	MF	GO:0005242	inward rectifier potassium channel activity	2026-08-01	24/22548	0.333333	3.70977	4.17321	0.000828185	0.0194749	0.017483	Kcnj8/Kcnj13/Kcnn2/Kcne2/Kcnj10/Kcnj16/Kcnj3/Kcnj12	8
GO:0016493	MF	GO:0016493	C-C chemokine receptor activity	2026-08-01	24/22548	0.333333	3.70977	4.17321	0.000828185	0.0194749	0.017483	Ccr7/Cxcr5/Ccrl2/Ccr4/Xcr1/Ccr3/Cx3cr1/Gpr75	8
GO:0042572	BP	GO:0042572	retinol metabolic process	2025-10-01	31/23040	0.322581	3.67025	4.6181	0.000212542	0.0149042	0.0132884	Lrat/Rbp4/Dhrs7/Dhrs9/Rdh11/Rdh12/Adh7/Rbp1/Adh1/Plb1	10
GO:2000353	BP	GO:2000353	positive regulation of endothelial cell apoptotic process	2025-08-01	25/23040	0.32	3.64089	4.10104	0.000971025	0.0375199	0.0334522	Akr1c14/Cd160/Pdcd4/Cd40lg/Itga4/Cd40/Ager/Thbs1	8
GO:0001968	MF	GO:0001968	fibronectin binding	2026-12-01	37/22548	0.324324	3.60951	4.99133	5.87246074112191e-05	0.00356915	0.0032041	Epha1/Fbln1/Tnc/Igfbp6/Mmp2/Itga4/Mmp9/Loxl3/Mmp13/Igfbp3/Thbs1/Itgb3	12
GO:0019957	MF	GO:0019957	C-C chemokine binding	2026-08-01	25/22548	0.32	3.56138	4.02611	0.0011228	0.0233841	0.0209923	Ccr7/Cxcr5/Ccrl2/Ccr4/Xcr1/Ccr3/Ackr1/Cx3cr1	8
GO:1990573	BP	GO:1990573	potassium ion import across plasma membrane	15/2025	48/23040	0.3125	3.55556	5.5017	9.13362478651629e-06	0.00140213	0.00125012	Kcnj8/Abcc9/Slc12a2/Kcnj13/Atp1a3/Kcne2/Kcnd3/Wnk3/Wnk1/Atp1a2/Kcnj10/Kcnj16/Slc12a3/Kcnj3/Kcnj12	15
GO:0018149	BP	GO:0018149	peptide cross-linking	2025-10-01	32/23040	0.3125	3.55556	4.49056	0.000284963	0.0173358	0.0154564	Dsp/Stfa2l1/Cstdc4/Csta3/Csta2/Stfa1/Cstdc5/Stfa2/Tgm3/Thbs1	10
GO:0019956	MF	GO:0019956	chemokine binding	2026-11-01	35/22548	0.314286	3.49779	4.64651	0.000163693	0.00639573	0.00574157	Fgf2/Ccr7/Cxcr5/Ccrl2/Itga4/Ccr4/Xcr1/Ccr3/Ackr1/Cx3cr1/Itgb3	11
GO:1990868	BP	GO:1990868	response to chemokine	24/2025	79/23040	0.303797	3.45654	6.78925	3.81240181239911e-08	1.66572633034054e-05	1.485138876069e-05	Ripor2/Lox/Dusp1/Slc12a2/Ccl22/Ccl17/Ccl8/Ppbp/Cxcl3/Cxcl1/Cxcl2/Gpr35/Ccrl2/Cxcl9/Wbp1l/Wnk1/Ccl19/Ackr1/Ccl24/Cx3cr1/Ccl11/Ccl12/Cxcl17/Gpr75	24
GO:1990869	BP	GO:1990869	cellular response to chemokine	24/2025	79/23040	0.303797	3.45654	6.78925	3.81240181239911e-08	1.66572633034054e-05	1.485138876069e-05	Ripor2/Lox/Dusp1/Slc12a2/Ccl22/Ccl17/Ccl8/Ppbp/Cxcl3/Cxcl1/Cxcl2/Gpr35/Ccrl2/Cxcl9/Wbp1l/Wnk1/Ccl19/Ackr1/Ccl24/Cx3cr1/Ccl11/Ccl12/Cxcl17/Gpr75	24
GO:1904090	CC	GO:1904090	peptidase inhibitor complex	2044-07-01	23/22834	0.304348	3.39994	3.61066	0.00308979	0.0430363	0.0379448	Stfa2l1/Cstdc4/Csta3/Csta2/Stfa1/Cstdc5/Stfa2	7
GO:0008305	CC	GO:0008305	integrin complex	2044-10-01	33/22834	0.30303	3.38522	4.29936	0.000436692	0.0102186	0.00900964	Itgb8/Itgbl1/Itga8/Itgb7/Itga4/Itgae/Itgb6/Itga2b/Itgb3/Itgam	10
GO:0006883	BP	GO:0006883	intracellular sodium ion homeostasis	2025-08-01	27/23040	0.296296	3.37119	3.82685	0.00170066	0.0497924	0.0443942	C7/Slc1a3/Slc12a2/Atp1a3/Scnn1g/Agt/Atp1a2/Scnn1a	8
GO:0086019	BP	GO:0086019	cell-cell signaling involved in cardiac conduction	2025-08-01	27/23040	0.296296	3.37119	3.82685	0.00170066	0.0497924	0.0443942	Pkp2/Nup155/Cacna1d/Ank2/Cxadr/Cacnb2/Kcnn2/Tbx5	8
GO:0098901	BP	GO:0098901	regulation of cardiac muscle cell action potential	2025-08-01	27/23040	0.296296	3.37119	3.82685	0.00170066	0.0497924	0.0443942	Dsg2/Pkp2/Fgf13/Ank2/Cxadr/Dsp/Slc4a3/Ctnna3	8
GO:0033688	BP	GO:0033688	regulation of osteoblast proliferation	2025-09-01	31/23040	0.290323	3.30323	3.98335	0.00103909	0.0385755	0.0343933	Igf1r/Tnn/Smad3/Gata1/Nell1/Bcl2/Bmp2/Hpse/Itgb3	9
GO:0099622	BP	GO:0099622	cardiac muscle cell membrane repolarization	2025-09-01	31/23040	0.290323	3.30323	3.98335	0.00103909	0.0385755	0.0343933	Kcnj8/Kcne4/Cacna1d/Ank2/Kcnn2/Kcne2/Kcnd3/Nos1ap/Nppa	9
GO:0070098	BP	GO:0070098	chemokine-mediated signaling pathway	20/2025	69/23040	0.289855	3.29791	5.93399	1.1769329739333e-06	0.000351841	0.000313697	Ccl22/Ccl17/Ccl8/Ppbp/Cxcl3/Cxcl1/Cxcl2/Gpr35/Ccrl2/Cxcl9/Wbp1l/Wnk1/Ccl19/Ackr1/Ccl24/Cx3cr1/Ccl11/Ccl12/Cxcl17/Gpr75	20
GO:0061900	BP	GO:0061900	glial cell activation	17/2025	59/23040	0.288136	3.27834	5.43927	8.03114394344639e-06	0.00126714	0.00112976	Tlr9/Kcnj8/Jak2/Snca/Stap1/Syt11/Aif1/Agt/Ager/Egfr/Cx3cr1/Sphk1/Il13/Cst7/Itgam/Tlr1/Il1b	17
GO:0008009	MF	GO:0008009	chemokine activity	13/2026	45/22548	0.288889	3.21514	4.67348	0.000112182	0.00542991	0.00487454	Ccl22/Ccl17/Ccl8/Ppbp/Cxcl3/Cxcl1/Cxcl2/Cxcl9/Ccl19/Ccl24/Ccl11/Ccl12/Cxcl17	13
GO:0001774	BP	GO:0001774	microglial cell activation	14/2025	50/23040	0.28	3.18578	4.80287	7.07830644689295e-05	0.0067008	0.00597434	Tlr9/Kcnj8/Jak2/Snca/Stap1/Syt11/Aif1/Ager/Cx3cr1/Sphk1/Il13/Cst7/Itgam/Tlr1	14
GO:0072349	MF	GO:0072349	modified amino acid transmembrane transporter activity	2026-08-01	28/22548	0.285714	3.17981	3.62633	0.00252978	0.0453702	0.0407297	Slc7a11/Slc22a15/Slc6a14/Slc22a21/Slc22a4/Slc16a12/Slc6a13/Slc1a4	8
GO:0086002	BP	GO:0086002	cardiac muscle cell action potential involved in contraction	2025-12-01	43/23040	0.27907	3.17519	4.43176	0.000238278	0.0158165	0.0141017	Dsg2/Pkp2/Nup155/Kcnj8/Kcne4/Cacna1d/Ank2/Dsp/Cacnb2/Kcnn2/Kcne2/Ctnna3	12
GO:0002269	BP	GO:0002269	leukocyte activation involved in inflammatory response	15/2025	54/23040	0.277778	3.16049	4.93399	4.36262090315321e-05	0.00467541	0.00416853	Tlr9/Kcnj8/Jak2/Snca/Stap1/Syt11/Aif1/Traf3ip2/Ager/Cx3cr1/Sphk1/Il13/Cst7/Itgam/Tlr1	15
GO:0089718	BP	GO:0089718	amino acid import across plasma membrane	16/2025	58/23040	0.275862	3.1387	5.06231	2.69012929017045e-05	0.00325105	0.00289859	Slc1a3/Slc38a2/Slc38a4/Slc7a11/Ace2/Arg2/Slc6a14/Slc22a4/Rgs4/Slc7a5/Slc6a13/Grm1/Agt/Kcnj10/Slc1a4/AU018091	16
GO:0098636	CC	GO:0098636	protein complex involved in cell adhesion	16/2044	57/22834	0.280702	3.13578	5.06222	2.65875544205941e-05	0.00116495	0.00102713	Jam3/Tnc/Itgb8/Itgbl1/Itga8/Itgb7/Tnn/Cd80/Nlgn1/Itga4/Itgae/Itgb6/Itga2b/Itgb3/Itgam/Plaur	16
GO:0061337	BP	GO:0061337	cardiac conduction	19/2025	69/23040	0.275362	3.13301	5.50817	5.01873864007772e-06	0.000979614	0.000873411	Dsg2/Pkp2/Nup155/Abcc9/Kcne4/Cacna1d/Ank2/Cxadr/Pln/Dsp/Ace2/Cacnb2/Kcnn2/Kcne2/Kcnd3/Agt/Slc4a3/Ctnna3/Tbx5	19
GO:0086065	BP	GO:0086065	cell communication involved in cardiac conduction	2025-11-01	40/23040	0.275	3.12889	4.1831	0.000494203	0.0244093	0.021763	Dsg2/Pkp2/Nup155/Cacna1d/Ank2/Cxadr/Dsp/Cacnb2/Kcnn2/Ctnna3/Tbx5	11
GO:0002825	BP	GO:0002825	regulation of T-helper 1 type immune response	2025-09-01	33/23040	0.272727	3.10303	3.75277	0.00169317	0.0497924	0.0443942	Nlrp10/Ccr7/Il12b/Tnfsf4/Arid5a/Ccl19/Il1rl1/Slamf1/Il1b	9
GO:0031295	BP	GO:0031295	T cell costimulation	2025-09-01	33/23040	0.272727	3.10303	3.75277	0.00169317	0.0497924	0.0443942	Ccr7/Cd160/Tnfsf4/Cd80/Ccl19/Tnfsf13b/Tnfrsf13c/Tnfrsf14/Spn	9
GO:2000406	BP	GO:2000406	positive regulation of T cell migration	2025-10-01	37/23040	0.27027	3.07508	3.92123	0.001025	0.0385755	0.0343933	Ccr7/Tnfsf4/Itga4/Aif1/Wnk1/Adam8/Tnfrsf14/Coro1a/Spn/Itgb3	10
GO:0071634	BP	GO:0071634	regulation of transforming growth factor beta production	2025-11-01	41/23040	0.268293	3.05257	4.08334	0.000622334	0.0280544	0.0250129	Fbln1/Itgb8/Lum/Smad3/Cd46/Agt/Adam8/Thbs1/Itgb6/Il13/Ptgs2	11
GO:0005272	MF	GO:0005272	sodium channel activity	2026-12-01	44/22548	0.272727	3.03527	4.24593	0.000369742	0.0115571	0.010375	Asic5/Nalcn/Hcn1/Grik5/Trpm2/Asic1/Scnn1g/Hcn3/Scnn1a/Scn4a/Scn3a/Scn2a	12
GO:0042088	BP	GO:0042088	T-helper 1 type immune response	14/2025	53/23040	0.264151	3.00545	4.53721	0.000141194	0.0114569	0.0102148	Nlrp10/Stat4/Ccr7/Cracr2a/Il12b/Tnfsf4/Arid5a/Il12a/Ccl19/Il1rl1/Il18rap/Spn/Slamf1/Il1b	14
GO:0086091	BP	GO:0086091	regulation of heart rate by cardiac conduction	2025-10-01	38/23040	0.263158	2.99415	3.81898	0.00128284	0.0428619	0.0382151	Dsg2/Pkp2/Kcne4/Cacna1d/Ank2/Dsp/Cacnb2/Kcne2/Kcnd3/Ctnna3	10
GO:0030593	BP	GO:0030593	neutrophil chemotaxis	28/2025	107/23040	0.261682	2.97736	6.36396	1.04044668222798e-07	4.22124082503924e-05	3.76360074300664e-05	Jam3/Ripor2/Camk1d/Ccr7/Cxadr/Ccl22/Ccl17/Csf3r/Rac2/Ccl8/Ppbp/Cxcl3/Cxcl1/Cxcl2/Cxcl9/Vav3/Dpep1/Ccl19/Ccl24/Sell/S100a8/S100a9/Jaml/Trem1/Ccl11/Ccl12/Itgam/Il1b	28
GO:0030020	MF	GO:0030020	extracellular matrix structural constituent conferring tensile strength	2026-12-01	45/22548	0.266667	2.96782	4.15169	0.000463401	0.0132294	0.0118763	Col1a2/Col4a4/Col25a1/Col17a1/Col5a3/Col6a6/Col8a1/Col13a1/Col1a1/Col16a1/Col4a3/Col5a1	12
GO:0071621	BP	GO:0071621	granulocyte chemotaxis	34/2025	132/23040	0.257576	2.93064	6.90517	7.22941234796969e-09	5.13288276705848e-06	4.57640826395818e-06	Jam3/Ripor2/Camk1d/Ccr7/Cxadr/Ccl22/Ccl17/Csf3r/Rac2/Ccl8/Ppbp/Cxcl3/Cxcl1/Cxcl2/Cxcl9/Vav3/Dpep1/Ccl19/Ccr3/Ccl24/Sell/Thbs1/S100a8/S100a9/S100a14/Jaml/Trem1/Ccl11/Ccl12/Cxcl17/Slamf1/Ptprj/Itgam/Il1b	34
GO:0042908	BP	GO:0042908	xenobiotic transport	2025-10-01	39/23040	0.25641	2.91738	3.72003	0.0015911	0.0487797	0.0434913	Slc18a2/Slc2a1/Slc15a2/Nr1i2/Slc22a4/Slc7a5/Abca8b/Abca8a/Abcb11/Slc47a2	10
GO:0071604	BP	GO:0071604	transforming growth factor beta production	2025-11-01	43/23040	0.255814	2.91059	3.89266	0.000962129	0.0374308	0.0333728	Fbln1/Itgb8/Lum/Smad3/Cd46/Agt/Adam8/Thbs1/Itgb6/Il13/Ptgs2	11
GO:0010543	BP	GO:0010543	regulation of platelet activation	2025-12-01	47/23040	0.255319	2.90496	4.05805	0.000583632	0.0265202	0.0236451	Jak2/Emilin2/Pdgfra/Prkcq/Gp5/Ctsg/Alox12/Gp9/Gp1ba/Svep1/C1qtnf1/Ptprj	12
GO:0048246	BP	GO:0048246	macrophage chemotaxis	2025-12-01	47/23040	0.255319	2.90496	4.05805	0.000583632	0.0265202	0.0236451	Ninj1/Ccr7/Tafa4/Mmp2/Stap1/Gpr35/Mmp9/Thbs1/Trem1/Cxcl17/Slamf1/Ptprj	12
GO:1905517	BP	GO:1905517	macrophage migration	17/2025	67/23040	0.253731	2.8869	4.80128	4.95340124899849e-05	0.00521024	0.00464538	Ninj1/Ccr7/Tafa4/Mmp2/Mmp14/Stap1/Gpr35/Mmp9/Cnn2/Ror2/Thbs1/Trim55/Cx3cr1/Trem1/Cxcl17/Slamf1/Ptprj	17
GO:0030315	CC	GO:0030315	T-tubule	19/2044	74/22834	0.256757	2.86829	5.04741	1.9637927596303e-05	0.00102822	0.000906577	Abcc9/Cacna1d/Adra1a/Igf1r/Ank2/Cacnb2/Esr1/Kcnn2/Fer1l5/Nos1/Nos1ap/Atp1a2/Cacng1/Casq1/Kcnj3/Scn2a/Cacng8/Cacng6/Kcnj12	19
GO:0015175	MF	GO:0015175	neutral L-amino acid transmembrane transporter activity	2026-11-01	43/22548	0.255814	2.84704	3.80912	0.00115424	0.0233841	0.0209923	Slc1a3/Slc38a2/Slc38a4/Slc7a11/Slc6a14/Slc36a3/Slc7a5/Slc6a19/Slc1a4/Slc32a1/Slc7a10	11
GO:0003009	BP	GO:0003009	skeletal muscle contraction	2025-11-01	44/23040	0.25	2.84444	3.80142	0.00118228	0.0406991	0.0362868	Atp8a2/Slc8a3/Chrng/Rcsd1/Tnnc2/Chrne/Casq1/Scn4a/Tnni2/Myh14/Tnnt1	11
GO:0086001	BP	GO:0086001	cardiac muscle cell action potential	15/2025	61/23040	0.245902	2.79781	4.36439	0.000197606	0.0143898	0.0128297	Dsg2/Pkp2/Nup155/Kcnj8/Kcne4/Cacna1d/Fgf13/Ank2/Cxadr/Dsp/Cacnb2/Kcnn2/Kcne2/Slc4a3/Ctnna3	15
GO:0034113	BP	GO:0034113	heterotypic cell-cell adhesion	14/2025	57/23040	0.245614	2.79454	4.21083	0.000323709	0.0182046	0.016231	Dsg2/Pkp2/Jam3/Ninj1/Cxadr/Dsp/Itgb7/Tnfaip3/Itga4/Wnk1/Ager/Ctnna3/Itgb3/Il1b	14
GO:1902476	BP	GO:1902476	chloride transmembrane transport	15/2025	62/23040	0.241935	2.75269	4.28967	0.000239729	0.0158165	0.0141017	Gabre/Gabra3/Slc1a3/Ano4/Gabrr3/Cftr/Slc12a2/Casr/Slc26a9/Glra1/Best3/Ano3/Slc12a3/Gabrd/Slc4a1	15
GO:0034109	BP	GO:0034109	homotypic cell-cell adhesion	21/2025	87/23040	0.241379	2.74636	5.06586	1.54763501086717e-05	0.00214404	0.0019116	Dsg2/Megf10/Pkp2/Ncam1/Jak2/Entpd1/Emilin2/Cxadr/Pdgfra/Slc7a11/Prkcq/Dsp/Ctsg/Gata1/Megf11/Alox12/C1qtnf1/Ctnna3/Itgb3/Gp6/Plaur	21
GO:0007157	BP	GO:0007157	heterophilic cell-cell adhesion via plasma membrane cell adhesion molecules	2025-12-01	50/23040	0.24	2.73067	3.80284	0.00105951	0.0390781	0.0348415	Fat4/Cxadr/Cd6/Nlgn1/Itga4/Cadm3/Sele/Sell/Jaml/Crb2/Igsf21/Ptprd	12
GO:0086003	BP	GO:0086003	cardiac muscle cell contraction	17/2025	72/23040	0.236111	2.68642	4.44887	0.000130568	0.011069	0.00986899	Dsg2/Pkp2/Nup155/Kcnj8/Abcc9/Kcne4/Cacna1d/Fgf13/Ank2/Pln/Dsp/Cacnb2/Kcnn2/Kcne2/Atp1a2/Ctnna3/Gsn	17
GO:0071622	BP	GO:0071622	regulation of granulocyte chemotaxis	15/2025	65/23040	0.230769	2.62564	4.07411	0.000415668	0.0210803	0.0187949	Jam3/Ripor2/Camk1d/Ccr7/Rac2/Ppbp/Ccl19/Sell/Thbs1/S100a14/Trem1/Cxcl17/Slamf1/Ptprj/Il1b	15
GO:0045332	BP	GO:0045332	phospholipid translocation	2025-12-01	52/23040	0.230769	2.62564	3.64297	0.00152848	0.0479281	0.042732	Atp8a2/Atp11b/Ano4/Tmem30c/Abcb4/Trpc5/Ano3/Atp11a/Plscr5/Slc4a1/Mfsd2a/Atp8b4	12
GO:0005581	CC	GO:0005581	collagen trimer	19/2044	81/22834	0.234568	2.62041	4.58082	7.56654043448755e-05	0.00245913	0.00216819	C1qtnf9/Col1a2/Lox/Col4a4/Emilin2/Lum/Col25a1/Col17a1/Col5a3/Col6a6/Col8a1/Col13a1/Col1a1/C1qtnf1/Fcna/Col16a1/Col4a3/C1qtnf7/Col5a1	19
GO:0008201	MF	GO:0008201	heparin binding	41/2026	175/22548	0.234286	2.60744	6.70727	8.50706326266877e-09	4.26746371701807e-06	3.83098590202815e-06	Eva1c/Adamts15/Ncam1/Ecm2/Lamc2/Ccn4/Tgfbr3/Fgf2/Alk/Lipg/Col25a1/Col17a1/Pcolce2/Fgf12/Col5a3/Fgf10/Sost/Rspo1/Ctsg/Serpind1/Fgfr4/Ccl8/Fgfbp3/Ptn/Igfals/Nell1/Defb34/Crispld2/Lipc/Thbs2/Prss57/Col13a1/Prss34/Reg4/Thbs1/Pcsk6/Pcolce/Prelp/Clec3b/Itgam/Col5a1	41
[truncated: 700 more rows]

## Sheet: File 1i
Supplementary File 1i: DESeq2 results showing the significant (p<0.05) DEGs in the myeloid cell cluster from mouse lungs exposed to 5-day nose-only exposure to tobacco-flavored ecig aerosol when compared to air control.
[truncated: 554 more rows]

[truncated: 15 more sheets: File 1j, File 1k, File 1l, File 1m, File 1n, File 1o, File 1p, File 1q, File 1r, File 1s, File 1t, File 1u, File 1v, File 1w, File 1x]
